# Supplementary material for: Transcriptomics and Metabolomics Changes Triggered by Inflorescence Removal in Panax notoginseng (Burk.)
Source: Front Plant Sci. 2021 Nov 12;12:761821. doi: 10.3389/fpls.2021.761821 (PMC8636121; doi:10.3389/fpls.2021.761821)
Supplement: Supplementary file 2 [file Data_Sheet_2.xlsx]

## Sheet: S1
Summary of the transcriptome assembly of P. notoginseng
Type	Number	Mean Length	N50	N90	Total Bases
Transcript	240748	1216	2045	512	292657861
Unigene	231922	1252	2062	534	290444294

## Sheet: S2
Summary of functional annotation for P. notoginseng unigenes.
Database	Number of Genes	Percentage (%)
KEGG	115980	50.01
NR	144866	62.46
SwissProt	103136	44.47
Trembl	143668	61.95
KOG	90888	39.19
GO	121606	52.43
Pfam	102866	44.35
Total Unigenes	231922	100

## Sheet: S3
DEGs shared among the three different organs
ID	A-L_vs_B-L	A-R_vs_B-R	A-J_vs_B-J	KEGG	NR	Swissprot	Tremble	KOG	GO	Pfam
Cluster-10658.113199	TRUE	TRUE	TRUE	K15718 linoleate 9S-lipoxygenase [EC:1.13.11.58] | (RefSeq) probable linoleate 9S-lipoxygenase 5 (A)	hypothetical protein DCAR_029405 [Daucus carota subsp. sativus]	RecName: Full=Probable linoleate 9S-lipoxygenase 5; EC=1.13.11.58; AltName: Full=Leaf lipoxygenase;	RecName: Full=Lipoxygenase {ECO:0000256|RuleBase:RU003975}; EC=1.13.11.- {ECO:0000256|RuleBase:RU003975};	--	GO:0005737,cytoplasm; GO:0046872,metal ion binding; GO:0016702,oxidoreductase activity, acting on single donors with incorporation of molecular oxygen, incorporation of two atoms of oxygen; GO:0031408,oxylipin biosynthetic process	Lipoxygenase
Cluster-10658.117838	TRUE	TRUE	TRUE	K20562 biphenyl-4-hydroxylase | (RefSeq) cytochrome P450 CYP736A12-like (A)	cytochrome P450 [Panax ginseng]	RecName: Full=Cytochrome P450 CYP736A12; EC=1.14.-.-;	SubName: Full=Cytochrome P450 {ECO:0000313|EMBL:BAD15331.1};	Cytochrome P450 CYP2 subfamily	GO:0016021,integral component of membrane; GO:0020037,heme binding; GO:0005506,iron ion binding; GO:0004497,monooxygenase activity; GO:0016705,oxidoreductase activity, acting on paired donors, with incorporation or reduction of molecular oxygen	Cytochrome P450
Cluster-10658.85268	TRUE	TRUE	TRUE	--	PREDICTED: uncharacterized protein LOC108197747 [Daucus carota subsp. sativus]	--	SubName: Full=Uncharacterized protein {ECO:0000313|EMBL:KZM83787.1};	--	--	PAR1 protein
Cluster-10658.98589	TRUE	TRUE	TRUE	--	PREDICTED: patatin-like protein 2 [Daucus carota subsp. sativus]	RecName: Full=Patatin-like protein 3; Short=AtPLP3; EC=3.1.1.-; AltName: Full=Patatin-related phospholipase A IIbeta; Short=pPLAIIb; AltName: Full=Phospholipase A IVC; Short=AtPLAIVC;	RecName: Full=Patatin {ECO:0000256|RuleBase:RU361262}; EC=3.1.1.- {ECO:0000256|RuleBase:RU361262};	Ca2+-independent phospholipase A2	GO:0005737,cytoplasm; GO:0016020,membrane; GO:0047372,acylglycerol lipase activity; GO:0004620,phospholipase activity; GO:0006952,defense response; GO:0016042,lipid catabolic process; GO:0009737,response to abscisic acid	Patatin-like phospholipase
Cluster-10658.107538	TRUE	TRUE	TRUE	K16055 trehalose 6-phosphate synthase/phosphatase [EC:2.4.1.15 3.1.3.12] | (RefSeq) probable alpha,alpha-trehalose-phosphate synthase [UDP-forming] 11 (A)	PREDICTED: probable alpha,alpha-trehalose-phosphate synthase [UDP-forming]	RecName: Full=Probable alpha,alpha-trehalose-phosphate synthase [UDP-forming] 11; EC=2.4.1.15; AltName: Full=Trehalose-6-phosphate synthase 11; Short=AtTPS11;	SubName: Full=Trehalose-6-phosphate synthase {ECO:0000313|EMBL:AGD98700.1};	Trehalose-6-phosphate synthase component TPS1 and related subunits	GO:0005829,cytosol; GO:0005739,mitochondrion; GO:0016791,phosphatase activity; GO:0016757,transferase activity, transferring glycosyl groups; GO:0005992,trehalose biosynthetic process; GO:0070413,trehalose metabolism in response to stress	haloacid dehalogenase-like hydrolase
Cluster-10658.118905	TRUE	TRUE	TRUE	K14652 3,4-dihydroxy 2-butanone 4-phosphate synthase / GTP cyclohydrolase II [EC:4.1.99.12 3.5.4.25] | (RefSeq) bifunctional riboflavin biosynthesis protein RIBA 1, chloroplastic (A)	PREDICTED: bifunctional riboflavin biosynthesis protein RIBA 1, chloroplastic [Daucus carota subsp. sativus]	RecName: Full=Bifunctional riboflavin biosynthesis protein RIBA 1, chloroplastic; Short=AtRIBA1; Includes: RecName: Full=3,4-dihydroxy-2-butanone 4-phosphate synthase; Short=DHBP synthase; EC=4.1.99.12; Includes: RecName: Full=GTP cyclohydrolase-2; EC=3.5.4.25; AltName: Full=GTP cyclohydrolase II; Flags: Precursor;	SubName: Full=Uncharacterized protein {ECO:0000313|EMBL:KZN09114.1};	Bifunctional GTP cyclohydrolase II/3,4-dihydroxy-2butanone-4-phosphate synthase	GO:0009507,chloroplast; GO:0009570,chloroplast stroma; GO:0016020,membrane; GO:0008686,3,4-dihydroxy-2-butanone-4-phosphate synthase activity; GO:0005525,GTP binding; GO:0003935,GTP cyclohydrolase II activity; GO:0046872,metal ion binding; GO:0009231,riboflavin biosynthetic process	GTP cyclohydrolase II
Cluster-10658.95051	TRUE	TRUE	TRUE	K15718 linoleate 9S-lipoxygenase [EC:1.13.11.58] | (RefSeq) probable linoleate 9S-lipoxygenase 5 (A)	PREDICTED: probable linoleate 9S-lipoxygenase 5 [Daucus carota subsp. sativus]	RecName: Full=Probable linoleate 9S-lipoxygenase 5; EC=1.13.11.58; AltName: Full=Leaf lipoxygenase;	RecName: Full=Lipoxygenase {ECO:0000256|RuleBase:RU003975}; EC=1.13.11.- {ECO:0000256|RuleBase:RU003975};	--	GO:0005737,cytoplasm; GO:0046872,metal ion binding; GO:0016702,oxidoreductase activity, acting on single donors with incorporation of molecular oxygen, incorporation of two atoms of oxygen; GO:0031408,oxylipin biosynthetic process	PLAT/LH2 domain
Cluster-10658.98186	TRUE	TRUE	TRUE	K04733 interleukin-1 receptor-associated kinase 4 [EC:2.7.11.1] | (RefSeq) probable LRR receptor-like serine/threonine-protein kinase At1g51880 (A)	PREDICTED: heavy metal-associated isoprenylated plant protein 3-like [Daucus carota subsp. sativus]	RecName: Full=Heavy metal-associated isoprenylated plant protein 39 {ECO:0000303|PubMed:21072340, ECO:0000303|PubMed:23368984}; Short=AtHIP39 {ECO:0000303|PubMed:21072340, ECO:0000303|PubMed:23368984}; Flags: Precursor;	SubName: Full=heavy metal-associated isoprenylated plant protein 3-like isoform X1 {ECO:0000313|RefSeq:XP_018838608.1};	Copper chaperone	GO:0005737,cytoplasm; GO:0046914,transition metal ion binding; GO:0046916,cellular transition metal ion homeostasis; GO:0030001,metal ion transport	Heavy-metal-associated domain
Cluster-10658.96885	TRUE	TRUE	TRUE	--	--	--	--	--	--	--
Cluster-10658.124942	TRUE	TRUE	TRUE	K15718 linoleate 9S-lipoxygenase [EC:1.13.11.58] | (RefSeq) probable linoleate 9S-lipoxygenase 5 (A)	PREDICTED: probable linoleate 9S-lipoxygenase 5 [Daucus carota subsp. sativus]	RecName: Full=Probable linoleate 9S-lipoxygenase 5; EC=1.13.11.58; AltName: Full=Leaf lipoxygenase;	RecName: Full=Lipoxygenase {ECO:0000256|RuleBase:RU003975}; EC=1.13.11.- {ECO:0000256|RuleBase:RU003975};	--	GO:0005737,cytoplasm; GO:0046872,metal ion binding; GO:0016702,oxidoreductase activity, acting on single donors with incorporation of molecular oxygen, incorporation of two atoms of oxygen; GO:0031408,oxylipin biosynthetic process	Lipoxygenase
Cluster-10658.97055	TRUE	TRUE	TRUE	--	--	--	--	--	--	--
Cluster-10658.79690	TRUE	TRUE	TRUE	K02943 large subunit ribosomal protein LP2 | (RefSeq) 60S acidic ribosomal protein P2-like (A)	hypothetical protein CFP56_34476 [Quercus suber]	--	SubName: Full=Uncharacterized protein {ECO:0000313|EMBL:CDP04409.1};	--	--	--
Cluster-10658.97674	TRUE	TRUE	TRUE	--	hypothetical protein DCAR_008982 [Daucus carota subsp. sativus]	--	SubName: Full=Uncharacterized protein {ECO:0000313|EMBL:KZN00228.1};	--	--	--
Cluster-10658.104921	TRUE	TRUE	TRUE	K22534 PR domain zinc finger protein 5 | (RefSeq) zinc finger protein ZAT4-like (A)	hypothetical protein CDL12_14978 [Handroanthus impetiginosus]	RecName: Full=Zinc finger protein ZAT10; AltName: Full=Salt-tolerance zinc finger;	SubName: Full=Uncharacterized protein {ECO:0000313|EMBL:PIN12402.1};	FOG: Zn-finger	GO:0005634,nucleus; GO:0003700,DNA-binding transcription factor activity; GO:0046872,metal ion binding; GO:0043565,sequence-specific DNA binding; GO:0035264,multicellular organism growth; GO:0045892,negative regulation of transcription, DNA-templated; GO:0010117,photoprotection; GO:0015979,photosynthesis; GO:0009737,response to abscisic acid; GO:0010200,response to chitin; GO:0009409,response to …	Zinc-finger double domain
Cluster-10658.118284	TRUE	TRUE	TRUE	K08332 vacuolar protein 8 | (RefSeq) U-box domain-containing protein 11-like (A)	PREDICTED: U-box domain-containing protein 19-like [Daucus carota subsp. sativus]	RecName: Full=U-box domain-containing protein 19; EC=2.3.2.27; AltName: Full=Plant U-box protein 19; AltName: Full=RING-type E3 ubiquitin transferase PUB19 {ECO:0000305};	RecName: Full=RING-type E3 ubiquitin transferase {ECO:0000256|SAAS:SAAS00702733}; EC=2.3.2.27 {ECO:0000256|SAAS:SAAS00702733};	FOG: Armadillo/beta-catenin-like repeats	GO:0005737,cytoplasm; GO:0005634,nucleus; GO:0004842,ubiquitin-protein transferase activity; GO:0010029,regulation of seed germination	Rotatin, an armadillo repeat protein, centriole functioning
Cluster-10658.98082	TRUE	TRUE	TRUE	K18211 synaptosomal-associated protein 25 | (RefSeq) SNAP25 homologous protein SNAP33 (A)	PREDICTED: SNAP25 homologous protein SNAP33 [Nicotiana tomentosiformis]	RecName: Full=SNAP25 homologous protein SNAP33 {ECO:0000303|PubMed:12746539}; Short=AtSNAP33 {ECO:0000303|PubMed:12746539}; AltName: Full=Snap25a {ECO:0000303|PubMed:11718726}; AltName: Full=Synaptosomal-associated protein SNAP25-like 1 {ECO:0000303|PubMed:11718726}; Short=SNAP-25-like protein 1 {ECO:0000303|PubMed:11718726};	SubName: Full=Snap25 likeous protein snap33 {ECO:0000313|EMBL:OIT02873.1};	SNAP-25 (synaptosome-associated protein) component of SNARE complex	GO:0009504,cell plate; GO:0009507,chloroplast; GO:0016021,integral component of membrane; GO:0005886,plasma membrane; GO:0005484,SNAP receptor activity; GO:0000911,cytokinesis by cell plate formation; GO:0061025,membrane fusion; GO:0015031,protein transport; GO:0009737,response to abscisic acid; GO:0009612,response to mechanical stimulus; GO:0051707,response to other organism; GO:0016192,vesicle-…	Snare region anchored in the vesicle membrane C-terminus
Cluster-10658.89047	TRUE	TRUE	TRUE	--	protein of unknown function DUF296 [Cynara cardunculus var. scolymus]	RecName: Full=AT-hook motif nuclear-localized protein 15 {ECO:0000312|EMBL:FAA00286.1}; AltName: Full=AT-hook protein of GA feedback 2 {ECO:0000303|PubMed:17277098};	RecName: Full=AT-hook motif nuclear-localized protein {ECO:0000256|PIRNR:PIRNR016021};	--	GO:0005634,nucleus; GO:0003680,AT DNA binding; GO:0003700,DNA-binding transcription factor activity; GO:0045087,innate immune response; GO:0045824,negative regulation of innate immune response; GO:0006351,transcription, DNA-templated	Plants and Prokaryotes Conserved (PCC) domain
Cluster-10658.106671	TRUE	TRUE	TRUE	K08332 vacuolar protein 8 | (RefSeq) hypothetical protein (A)	PREDICTED: U-box domain-containing protein 28-like [Daucus carota subsp. sativus]	RecName: Full=U-box domain-containing protein 29; EC=2.3.2.27; AltName: Full=Plant U-box protein 29; AltName: Full=RING-type E3 ubiquitin transferase PUB29 {ECO:0000305};	RecName: Full=RING-type E3 ubiquitin transferase {ECO:0000256|SAAS:SAAS00702733}; EC=2.3.2.27 {ECO:0000256|SAAS:SAAS00702733};	--	GO:0009506,plasmodesma; GO:0070696,transmembrane receptor protein serine/threonine kinase binding; GO:0004842,ubiquitin-protein transferase activity; GO:0016567,protein ubiquitination; GO:0010200,response to chitin	U-box domain
Cluster-10658.96812	TRUE	TRUE	TRUE	--	Arabinogalactan peptide, AGP [Cynara cardunculus var. scolymus]	--	SubName: Full=Arabinogalactan peptide, AGP {ECO:0000313|EMBL:KVH93911.1};	--	GO:0016021,integral component of membrane	Arabinogalactan peptide
Cluster-10658.98558	TRUE	TRUE	TRUE	K14497 protein phosphatase 2C [EC:3.1.3.16] | (RefSeq) protein phosphatase 2C 37 (A)	PREDICTED: protein phosphatase 2C 37 [Daucus carota subsp. sativus]	RecName: Full=Protein phosphatase 2C 37; Short=AtPP2C37; EC=3.1.3.16; AltName: Full=Protein ABA-HYPERSENSITIVE GERMINATION 3; AltName: Full=Protein phosphatase 2C A; Short=PP2CA;	SubName: Full=Uncharacterized protein {ECO:0000313|EMBL:KZM84982.1};	Serine/threonine protein phosphatase	GO:0005829,cytosol; GO:0005634,nucleus; GO:0046872,metal ion binding; GO:0004721,phosphoprotein phosphatase activity; GO:0019901,protein kinase binding; GO:0004722,protein serine/threonine phosphatase activity; GO:0009738,abscisic acid-activated signaling pathway; GO:0009788,negative regulation of abscisic acid-activated signaling pathway; GO:0010360,negative regulation of anion channel activity;…	Protein phosphatase 2C
Cluster-10658.122048	TRUE	TRUE	TRUE	K16055 trehalose 6-phosphate synthase/phosphatase [EC:2.4.1.15 3.1.3.12] | (RefSeq) probable alpha,alpha-trehalose-phosphate synthase [UDP-forming] 11 (A)	PREDICTED: probable alpha,alpha-trehalose-phosphate synthase [UDP-forming]	RecName: Full=Probable alpha,alpha-trehalose-phosphate synthase [UDP-forming] 11; EC=2.4.1.15; AltName: Full=Trehalose-6-phosphate synthase 11; Short=AtTPS11;	SubName: Full=Trehalose-6-phosphate synthase {ECO:0000313|EMBL:AGD98700.1};	Trehalose-6-phosphate synthase component TPS1 and related subunits	GO:0005829,cytosol; GO:0005739,mitochondrion; GO:0016791,phosphatase activity; GO:0016757,transferase activity, transferring glycosyl groups; GO:0005992,trehalose biosynthetic process; GO:0070413,trehalose metabolism in response to stress	haloacid dehalogenase-like hydrolase
Cluster-10658.102380	TRUE	TRUE	TRUE	--	PREDICTED: nematode resistance protein-like HSPRO2 [Daucus carota subsp. sativus]	RecName: Full=Nematode resistance protein-like HSPRO2; AltName: Full=AKINbetagamma-interacting protein 2; AltName: Full=Ortholog of sugar beet HS1 PRO-1 protein 2; AltName: Full=Protein Hs1pro-2;	SubName: Full=Uncharacterized protein {ECO:0000313|EMBL:KZN03041.1};	--	GO:0005737,cytoplasm; GO:0020037,heme binding; GO:0046872,metal ion binding; GO:0009816,defense response to bacterium, incompatible interaction; GO:0006979,response to oxidative stress; GO:0009751,response to salicylic acid; GO:0019441,tryptophan catabolic process to kynurenine	Hs1pro-1 N-terminus
Cluster-10658.97780	TRUE	TRUE	TRUE	--	alpha-amylase, partial [Ligusticum sinense]	RecName: Full=Miraculin; Short=MIR; Flags: Precursor;	SubName: Full=Alpha-amylase {ECO:0000313|EMBL:AOO34766.1}; Flags: Fragment;	--	GO:0004866,endopeptidase inhibitor activity	Trypsin and protease inhibitor
Cluster-10658.97616	TRUE	TRUE	TRUE	--	PREDICTED: protein YLS9 [Daucus carota subsp. sativus]	RecName: Full=NDR1/HIN1-like protein 10 {ECO:0000303|PubMed:14666423}; Short=AtNHL10 {ECO:0000305}; AltName: Full=Protein YELLOW-LEAF-SPECIFIC GENE 9 {ECO:0000303|PubMed:11230571};	SubName: Full=Uncharacterized protein {ECO:0000313|EMBL:KZM91921.1};	--	GO:0046658,anchored component of plasma membrane; GO:0009507,chloroplast; GO:0016021,integral component of membrane; GO:0009506,plasmodesma; GO:0004871,NA; GO:0051607,defense response to virus; GO:0010150,leaf senescence; GO:0051707,response to other organism	Cysteine-rich TM module stress tolerance
Cluster-10658.56431	TRUE	TRUE	TRUE	K00511 squalene monooxygenase [EC:1.14.14.17] | (RefSeq) squalene monooxygenase-like (A)	squalene epoxidase [Panax notoginseng]	RecName: Full=Squalene monooxygenase; EC=1.14.14.17 {ECO:0000250|UniProtKB:Q9SM02}; AltName: Full=Squalene epoxidase; Short=SE;	SubName: Full=Squalene epoxidase {ECO:0000313|EMBL:AGI19257.1};	Squalene monooxygenase	GO:0016021,integral component of membrane; GO:0050660,flavin adenine dinucleotide binding; GO:0004506,squalene monooxygenase activity	Tryptophan halogenase
Cluster-10658.102682	TRUE	TRUE	TRUE	K16040 trans-resveratrol di-O-methyltransferase [EC:2.1.1.240] | (RefSeq) trans-resveratrol di-O-methyltransferase (A)	PREDICTED: trans-resveratrol di-O-methyltransferase [Vitis vinifera]	RecName: Full=Trans-resveratrol di-O-methyltransferase; EC=2.1.1.240; AltName: Full=Resveratrol O-methyltransferase; Short=ROMT; Short=VvROMT;	SubName: Full=Uncharacterized protein {ECO:0000313|EMBL:CCB47328.1};	Hydroxyindole-O-methyltransferase and related SAM-dependent methyltransferases	GO:0008171,O-methyltransferase activity; GO:0046983,protein dimerization activity; GO:0102303,resveratrol 3,5-O-dimethyltransferase activity; GO:0008757,S-adenosylmethionine-dependent methyltransferase activity; GO:0019438,aromatic compound biosynthetic process	IclR helix-turn-helix domain
Cluster-10658.126659	TRUE	TRUE	TRUE	K03526 (E)-4-hydroxy-3-methylbut-2-enyl-diphosphate synthase [EC:1.17.7.1 1.17.7.3] | (RefSeq) 4-hydroxy-3-methylbut-2-en-1-yl diphosphate synthase (ferredoxin), chloroplastic-like (A)	(E)-4-hydroxy-3-methylbut-2-enyl-diphosphate synthase, partial [Hedera helix]	RecName: Full=4-hydroxy-3-methylbut-2-en-1-yl diphosphate synthase (ferredoxin), chloroplastic; EC=1.17.7.1 {ECO:0000269|PubMed:15650872}; AltName: Full=1-hydroxy-2-methyl-2-(E)-butenyl 4-diphosphate synthase; AltName: Full=Protein CHLOROPLAST BIOGENESIS 4; AltName: Full=Protein CONSTITUTIVE SUBTILISIN 3; Flags: Precursor;	SubName: Full=(E)-4-hydroxy-3-methylbut-2-enyl-diphosphate synthase {ECO:0000313|EMBL:APY22346.1}; Flags: Fragment;	--	GO:0009507,chloroplast; GO:0009941,chloroplast envelope; GO:0009570,chloroplast stroma; GO:0051539,4 iron, 4 sulfur cluster binding; GO:0046429,4-hydroxy-3-methylbut-2-en-1-yl diphosphate synthase activity; GO:0005506,iron ion binding; GO:0019288,isopentenyl diphosphate biosynthetic process, methylerythritol 4-phosphate pathway; GO:0009617,response to bacterium; GO:0009862,systemic acquired resis…	GcpE protein
Cluster-10658.88428	TRUE	TRUE	TRUE	K04733 interleukin-1 receptor-associated kinase 4 [EC:2.7.11.1] | (RefSeq) cysteine-rich receptor-like protein kinase 3 isoform X1 (A)	PREDICTED: cysteine-rich receptor-like protein kinase 3 [Daucus carota subsp. sativus]	RecName: Full=Cysteine-rich receptor-like protein kinase 3; Short=Cysteine-rich RLK3; EC=2.7.11.-; Flags: Precursor;	SubName: Full=Uncharacterized protein {ECO:0000313|EMBL:KZM87317.1};	--	GO:0016021,integral component of membrane; GO:0005886,plasma membrane; GO:0005524,ATP binding; GO:0004674,protein serine/threonine kinase activity	Domain of unknown function (DUF3403)
Cluster-10658.97129	TRUE	TRUE	TRUE	K01183 chitinase [EC:3.2.1.14] | (RefSeq) hevamine-A (A)	PREDICTED: hevamine-A [Ricinus communis]	RecName: Full=Hevamine-A; Includes: RecName: Full=Chitinase; EC=3.2.1.14; Includes: RecName: Full=Lysozyme; EC=3.2.1.17; Flags: Precursor;	SubName: Full=Hevamine-A, putative {ECO:0000313|EMBL:EEF49015.1}; EC=3.2.1.17 {ECO:0000313|EMBL:EEF49015.1};	Chitinase	GO:0005773,vacuole; GO:0004568,chitinase activity; GO:0003796,lysozyme activity; GO:0006032,chitin catabolic process; GO:0000272,polysaccharide catabolic process	Glycosyl hydrolases family 18
Cluster-10658.88450	TRUE	TRUE	TRUE	K00799 glutathione S-transferase [EC:2.5.1.18] | (RefSeq) probable glutathione S-transferase (A)	PREDICTED: probable glutathione S-transferase [Daucus carota subsp. sativus]	RecName: Full=Probable glutathione S-transferase; EC=2.5.1.18; AltName: Full=Auxin-induced protein PGNT35/PCNT111;	SubName: Full=Uncharacterized protein {ECO:0000313|EMBL:KZN03392.1};	Glutathione S-transferase	GO:0004364,glutathione transferase activity; GO:0009734,auxin-activated signaling pathway	Glutathione S-transferase N-terminal domain
Cluster-10658.103369	TRUE	TRUE	TRUE	K09775 uncharacterized protein | (RefSeq) uncharacterized protein LOC111283728 isoform X1 (A)	PREDICTED: uncharacterized protein LOC108209805 [Daucus carota subsp. sativus]	--	SubName: Full=Uncharacterized protein {ECO:0000313|EMBL:KZM85834.1};	--	GO:0016021,integral component of membrane; GO:0008375,acetylglucosaminyltransferase activity	Core-2/I-Branching enzyme
Cluster-10658.96840	TRUE	TRUE	TRUE	--	PR10-3, partial [Panax ginseng]	RecName: Full=Ribonuclease 2; EC=3.1.-.-;	SubName: Full=PR10-3 {ECO:0000313|EMBL:ADW93868.1}; Flags: Fragment;	--	GO:0005737,cytoplasm; GO:0004519,endonuclease activity; GO:0006952,defense response; GO:0009607,response to biotic stimulus	Pathogenesis-related protein Bet v I family
Cluster-10658.98785	TRUE	TRUE	TRUE	K22395 cinnamyl-alcohol dehydrogenase [EC:1.1.1.195] | (RefSeq) tetrahydrocannabinolic acid synthase-like (A)	PREDICTED: tetrahydrocannabinolic acid synthase-like [Daucus carota subsp. sativus]	RecName: Full=Berberine bridge enzyme-like 8 {ECO:0000303|PubMed:26037923}; Short=AtBBE-like 8 {ECO:0000303|PubMed:26037923}; EC=1.1.1.- {ECO:0000250|UniProtKB:O64743}; Flags: Precursor;	SubName: Full=Uncharacterized protein {ECO:0000313|EMBL:KZN03653.1};	--	GO:0005618,cell wall; GO:0005576,extracellular region; GO:0050660,flavin adenine dinucleotide binding; GO:0016614,oxidoreductase activity, acting on CH-OH group of donors	Berberine and berberine like
Cluster-10658.93816	TRUE	TRUE	TRUE	K13459 disease resistance protein RPS2 | (RefSeq) probable disease resistance protein At1g52660 (A)	PREDICTED: disease resistance protein RPS4-like [Daucus carota subsp. sativus]	RecName: Full=Toll/interleukin-1 receptor-like protein; Short=AtTIR;	RecName: Full=Carboxypeptidase {ECO:0000256|RuleBase:RU361156}; EC=3.4.16.- {ECO:0000256|RuleBase:RU361156};	--	GO:0005737,cytoplasm; GO:0009506,plasmodesma; GO:0006952,defense response; GO:0007165,signal transduction	Glutaredoxin
Cluster-10658.101295	TRUE	TRUE	TRUE	K19747 BAHD acyltransferase [EC:2.3.1.-] | (RefSeq) BAHD acyltransferase DCR (A)	hypothetical protein CDL12_22305 [Handroanthus impetiginosus]	--	SubName: Full=Uncharacterized protein {ECO:0000313|EMBL:PIN05159.1};	--	--	C2 domain
Cluster-10658.102680	TRUE	TRUE	TRUE	K16040 trans-resveratrol di-O-methyltransferase [EC:2.1.1.240] | (RefSeq) trans-resveratrol di-O-methyltransferase (A)	PREDICTED: trans-resveratrol di-O-methyltransferase [Vitis vinifera]	RecName: Full=Trans-resveratrol di-O-methyltransferase; EC=2.1.1.240; AltName: Full=Resveratrol O-methyltransferase; Short=ROMT; Short=VvROMT;	SubName: Full=Uncharacterized protein {ECO:0000313|EMBL:CCB47328.1};	Hydroxyindole-O-methyltransferase and related SAM-dependent methyltransferases	GO:0008171,O-methyltransferase activity; GO:0046983,protein dimerization activity; GO:0102303,resveratrol 3,5-O-dimethyltransferase activity; GO:0008757,S-adenosylmethionine-dependent methyltransferase activity; GO:0019438,aromatic compound biosynthetic process	Dimerisation domain
Cluster-10658.101053	TRUE	TRUE	TRUE	--	PREDICTED: uncharacterized protein LOC108211657 [Daucus carota subsp. sativus]	--	SubName: Full=Uncharacterized protein {ECO:0000313|EMBL:KZN00109.1};	--	--	--
Cluster-10658.135349	TRUE	TRUE	TRUE	K23480 zinc finger protein 362/384 | (RefSeq) zinc finger protein ZAT5 (A)	PREDICTED: zinc finger protein ZAT12-like [Daucus carota subsp. sativus]	RecName: Full=Zinc finger protein ZAT11;	SubName: Full=Uncharacterized protein {ECO:0000313|EMBL:KZM95648.1};	FOG: Zn-finger	GO:0005634,nucleus; GO:0003700,DNA-binding transcription factor activity; GO:0046872,metal ion binding; GO:0003676,nucleic acid binding; GO:0071289,cellular response to nickel ion; GO:2000280,regulation of root development; GO:0006355,regulation of transcription, DNA-templated; GO:0010200,response to chitin; GO:0006351,transcription, DNA-templated	C2H2 type zinc-finger (2 copies)
Cluster-10658.107611	TRUE	TRUE	TRUE	K02183 calmodulin | (RefSeq) TMV resistance protein N-like (A)	PREDICTED: disease resistance protein RPS4-like [Daucus carota subsp. sativus]	RecName: Full=TMV resistance protein N;	RecName: Full=Carboxypeptidase {ECO:0000256|RuleBase:RU361156}; EC=3.4.16.- {ECO:0000256|RuleBase:RU361156};	--	GO:0005737,cytoplasm; GO:0043531,ADP binding; GO:0005524,ATP binding; GO:0009626,plant-type hypersensitive response; GO:0007165,signal transduction	Glutaredoxin
Cluster-10658.106148	TRUE	TRUE	TRUE	K20561 costunolide synthase [EC:1.14.14.150] | (RefSeq) costunolide synthase (A)	cytochrome P450 [Panax notoginseng]	RecName: Full=Cytochrome P450 CYP71D313; EC=1.14.-.-;	SubName: Full=Cytochrome P450 {ECO:0000313|EMBL:AED99871.1};	Cytochrome P450 CYP2 subfamily	GO:0016021,integral component of membrane; GO:0020037,heme binding; GO:0005506,iron ion binding; GO:0004497,monooxygenase activity; GO:0016705,oxidoreductase activity, acting on paired donors, with incorporation or reduction of molecular oxygen	Nucleotide modification associated domain 1
Cluster-10658.84720	TRUE	TRUE	TRUE	K04733 interleukin-1 receptor-associated kinase 4 [EC:2.7.11.1] | (RefSeq) receptor-like cytosolic serine/threonine-protein kinase RBK2 (A)	PREDICTED: receptor-like cytosolic serine/threonine-protein kinase RBK2 [Daucus carota subsp. sativus]	RecName: Full=Receptor-like cytosolic serine/threonine-protein kinase RBK2; EC=2.7.11.1; AltName: Full=Protein ROP BINDING PROTEIN KINASES 2;	SubName: Full=Uncharacterized protein {ECO:0000313|EMBL:KZN04991.1};	Serine/threonine protein kinase	GO:0005737,cytoplasm; GO:0005634,nucleus; GO:0005886,plasma membrane; GO:0005524,ATP binding; GO:0051020,GTPase binding; GO:0004675,transmembrane receptor protein serine/threonine kinase activity; GO:0007166,cell surface receptor signaling pathway; GO:0006468,protein phosphorylation	Fungal protein kinase
Cluster-10658.97068	TRUE	TRUE	TRUE	K22683 aspartyl protease family protein [EC:3.4.23.-] | (RefSeq) aspartyl protease family protein 2 (A)	PREDICTED: basic 7S globulin-like [Daucus carota subsp. sativus]	RecName: Full=Basic 7S globulin; AltName: Full=SBg7S; Short=Bg; Contains: RecName: Full=Basic 7S globulin high kDa subunit; Contains: RecName: Full=Basic 7S globulin low kDa subunit; Flags: Precursor;	SubName: Full=Uncharacterized protein {ECO:0000313|EMBL:KZN09753.1};	Aspartyl protease	GO:0004190,aspartic-type endopeptidase activity; GO:0042802,identical protein binding; GO:0045735,nutrient reservoir activity; GO:0030163,protein catabolic process; GO:0006508,proteolysis	Xylanase inhibitor N-terminal
Cluster-10658.101546	TRUE	TRUE	TRUE	--	PREDICTED: uncharacterized protein LOC108206783 [Daucus carota subsp. sativus]	RecName: Full=Sigma factor binding protein 1, chloroplastic; Short=AtsibI; Short=Sigma factor binding protein I; AltName: Full=SigA binding protein; AltName: Full=VQ motif-containing protein 23 {ECO:0000303|PubMed:22535423}; Short=AtVQ23 {ECO:0000303|PubMed:22535423}; Flags: Precursor;	SubName: Full=VQ domain-containing protein {ECO:0000313|EMBL:GAV69405.1};	--	GO:0009507,chloroplast; GO:0005634,nucleus; GO:0071482,cellular response to light stimulus; GO:0009816,defense response to bacterium, incompatible interaction; GO:0051091,positive regulation of DNA-binding transcription factor activity	VQ motif
Cluster-10658.57309	TRUE	TRUE	TRUE	K23480 zinc finger protein 362/384 | (RefSeq) zinc finger protein ZAT5 (A)	PREDICTED: zinc finger protein ZAT12-like [Daucus carota subsp. sativus]	RecName: Full=Zinc finger protein ZAT12; AltName: Full=Protein RESPONSIVE TO HIGH LIGHT 41;	SubName: Full=Uncharacterized protein {ECO:0000313|EMBL:KZM97032.1};	FOG: Zn-finger	GO:0005634,nucleus; GO:0003700,DNA-binding transcription factor activity; GO:0046872,metal ion binding; GO:0043565,sequence-specific DNA binding; GO:0009631,cold acclimation; GO:0042538,hyperosmotic salinity response; GO:0009643,photosynthetic acclimation; GO:0010200,response to chitin; GO:0009409,response to cold; GO:0009408,response to heat; GO:0009416,response to light stimulus; GO:0006979,res…	C2H2-type zinc finger
Cluster-10658.83361	TRUE	TRUE	TRUE	K14493 gibberellin receptor GID1 [EC:3.-.-.-] | (RefSeq) gibberellin receptor GID1C (A)	PREDICTED: probable carboxylesterase 16 [Daucus carota subsp. sativus]	RecName: Full=Probable carboxylesterase 16; AltName: Full=AtCXE16; EC=3.1.1.1;	SubName: Full=Uncharacterized protein {ECO:0000313|EMBL:KZN06185.1};	Arylacetamide deacetylase	GO:0052689,carboxylic ester hydrolase activity; GO:0016787,hydrolase activity; GO:0009056,catabolic process	Carboxylesterase family
Cluster-10658.106596	TRUE	TRUE	TRUE	K08332 vacuolar protein 8 | (RefSeq) hypothetical protein (A)	immediate-early fungal elicitor protein CMPG1 [Petroselinum crispum]	RecName: Full=U-box domain-containing protein 21; EC=2.3.2.27; AltName: Full=Plant U-box protein 21; AltName: Full=RING-type E3 ubiquitin transferase PUB21 {ECO:0000305};	RecName: Full=RING-type E3 ubiquitin transferase {ECO:0000256|SAAS:SAAS00702733}; EC=2.3.2.27 {ECO:0000256|SAAS:SAAS00702733};	--	GO:0004842,ubiquitin-protein transferase activity; GO:0010200,response to chitin	Permease family
Cluster-10658.96617	TRUE	TRUE	TRUE	K21396 ATP-binding cassette, subfamily G (WHITE), eye pigment precursor transporter | (RefSeq) ABC transporter G family member 41-like (A)	pleiotropic drug resistance transporter, partial [Panax ginseng]	RecName: Full=Pleiotropic drug resistance protein 1; AltName: Full=NtPDR1;	SubName: Full=Pleiotropic drug resistance transporter {ECO:0000313|EMBL:AJK30638.1}; Flags: Fragment;	Pleiotropic drug resistance proteins (PDR1-15), ABC superfamily	GO:0016021,integral component of membrane; GO:0005524,ATP binding; GO:0016887,ATPase activity	ABC-2 type transporter
Cluster-10658.77922	TRUE	TRUE	TRUE	K13415 protein brassinosteroid insensitive 1 [EC:2.7.10.1 2.7.11.1] | (RefSeq) protein BRASSINOSTEROID INSENSITIVE 1-like (A)	hypothetical protein DCAR_021513 [Daucus carota subsp. sativus]	RecName: Full=Probable LRR receptor-like serine/threonine-protein kinase At1g74360; EC=2.7.11.1; Flags: Precursor;	SubName: Full=Uncharacterized protein {ECO:0000313|EMBL:KZM91122.1};	--	GO:0016021,integral component of membrane; GO:0031966,mitochondrial membrane; GO:0005739,mitochondrion; GO:0005886,plasma membrane; GO:0005524,ATP binding; GO:0004674,protein serine/threonine kinase activity; GO:0002215,defense response to nematode	Phosphotransferase enzyme family
Cluster-10658.105970	TRUE	TRUE	TRUE	K08332 vacuolar protein 8 | (RefSeq) hypothetical protein (A)	immediate-early fungal elicitor protein CMPG1 [Petroselinum crispum]	RecName: Full=U-box domain-containing protein 21; EC=2.3.2.27; AltName: Full=Plant U-box protein 21; AltName: Full=RING-type E3 ubiquitin transferase PUB21 {ECO:0000305};	RecName: Full=RING-type E3 ubiquitin transferase {ECO:0000256|SAAS:SAAS00702733}; EC=2.3.2.27 {ECO:0000256|SAAS:SAAS00702733};	--	GO:0004842,ubiquitin-protein transferase activity; GO:0010200,response to chitin	RING-type zinc-finger
Cluster-10658.105148	TRUE	TRUE	TRUE	K00512 steroid 17alpha-monooxygenase / 17alpha-hydroxyprogesterone deacetylase [EC:1.14.14.19 1.14.14.32] | (RefSeq) premnaspirodiene oxygenase-like (A)	cytochrome P450 [Panax notoginseng]	RecName: Full=Premnaspirodiene oxygenase; Short=HPO; EC=1.14.13.121; AltName: Full=Cytochrome P450 71D55;	SubName: Full=Cytochrome P450 {ECO:0000313|EMBL:AED99878.1};	Cytochrome P450 CYP2 subfamily	GO:0016021,integral component of membrane; GO:0020037,heme binding; GO:0005506,iron ion binding; GO:0004497,monooxygenase activity; GO:0016705,oxidoreductase activity, acting on paired donors, with incorporation or reduction of molecular oxygen	Cytochrome P450
Cluster-10658.99898	TRUE	TRUE	TRUE	K01177 beta-amylase [EC:3.2.1.2] | (RefSeq) beta-amylase (A)	PREDICTED: beta-amylase [Vitis vinifera]	RecName: Full=Beta-amylase; EC=3.2.1.2; AltName: Full=1,4-alpha-D-glucan maltohydrolase;	RecName: Full=Beta-amylase {ECO:0000256|RuleBase:RU000509}; EC=3.2.1.2 {ECO:0000256|RuleBase:RU000509};	--	GO:0102229,amylopectin maltohydrolase activity; GO:0016161,beta-amylase activity; GO:0000272,polysaccharide catabolic process	Glycosyl hydrolase family 14
Cluster-10658.107552	TRUE	TRUE	TRUE	K01087 trehalose 6-phosphate phosphatase [EC:3.1.3.12] | (RefSeq) trehalose-phosphate phosphatase A-like (A)	hypothetical protein DCAR_009441 [Daucus carota subsp. sativus]	RecName: Full=Trehalose-phosphate phosphatase A; Short=AtTPPA; EC=3.1.3.12; AltName: Full=Trehalose 6-phosphate phosphatase;	RecName: Full=Trehalose 6-phosphate phosphatase {ECO:0000256|RuleBase:RU361117}; EC=3.1.3.12 {ECO:0000256|RuleBase:RU361117};	Trehalose-6-phosphate synthase component TPS1 and related subunits	GO:0004805,trehalose-phosphatase activity; GO:0005992,trehalose biosynthetic process	Trehalose-phosphatase
Cluster-10658.89406	TRUE	TRUE	TRUE	K00261 glutamate dehydrogenase (NAD(P)+) [EC:1.4.1.3] | (RefSeq) glutamate dehydrogenase A (A)	glutamate dehydrogenase A [Olea europaea var. sylvestris]	RecName: Full=Glutamate dehydrogenase A; Short=GDH A; EC=1.4.1.3;	RecName: Full=Glutamate dehydrogenase {ECO:0000256|PIRNR:PIRNR000185};	Glutamate/leucine/phenylalanine/valine dehydrogenases	GO:0004353,glutamate dehydrogenase [NAD(P)+] activity; GO:0006520,cellular amino acid metabolic process	Glutamate/Leucine/Phenylalanine/Valine dehydrogenase
Cluster-10658.105018	TRUE	TRUE	TRUE	K14803 protein phosphatase PTC2/3 [EC:3.1.3.16] | (RefSeq) probable protein phosphatase 2C 49 (A)	PREDICTED: probable protein phosphatase 2C 49 [Daucus carota subsp. sativus]	RecName: Full=Probable protein phosphatase 2C 49; Short=AtPP2C49; EC=3.1.3.16;	SubName: Full=Uncharacterized protein {ECO:0000313|EMBL:KZN10269.1};	Serine/threonine protein phosphatase	GO:0046872,metal ion binding; GO:0004722,protein serine/threonine phosphatase activity	Protein phosphatase 2C
Cluster-10658.88581	TRUE	TRUE	TRUE	--	--	--	--	--	--	--
Cluster-10658.77106	TRUE	TRUE	TRUE	K04733 interleukin-1 receptor-associated kinase 4 [EC:2.7.11.1] | (RefSeq) uncharacterized protein LOC110908553 (A)	PREDICTED: IQ domain-containing protein IQM1 [Daucus carota subsp. sativus]	RecName: Full=IQ domain-containing protein IQM1 {ECO:0000305}; AltName: Full=IQ motif-containing protein 1 {ECO:0000303|Ref.6};	SubName: Full=Uncharacterized protein {ECO:0000313|EMBL:KZM84185.1};	--	GO:0005737,cytoplasm; GO:0005634,nucleus; GO:0005516,calmodulin binding; GO:0010119,regulation of stomatal movement	IQ calmodulin-binding motif
Cluster-10658.97762	TRUE	TRUE	TRUE	K01892 histidyl-tRNA synthetase [EC:6.1.1.21] | (RefSeq) WRKY family transcription factor (A)	PREDICTED: probable WRKY transcription factor 31 [Daucus carota subsp. sativus]	RecName: Full=WRKY transcription factor 6 {ECO:0000303|PubMed:11722756}; AltName: Full=WRKY DNA-binding protein 6 {ECO:0000303|PubMed:11722756}; Short=AtWRKY6 {ECO:0000303|PubMed:11722756};	SubName: Full=Uncharacterized protein {ECO:0000313|EMBL:KZN11577.1};	--	GO:0005634,nucleus; GO:0003700,DNA-binding transcription factor activity; GO:0043565,sequence-specific DNA binding; GO:0044212,transcription regulatory region DNA binding; GO:0080169,cellular response to boron-containing substance deprivation; GO:0016036,cellular response to phosphate starvation; GO:0009873,ethylene-activated signaling pathway; GO:0045892,negative regulation of transcription, DNA…	Domain of unknown function (DUF4530)
Cluster-10658.99718	TRUE	TRUE	TRUE	K14494 DELLA protein | (RefSeq) DELLA protein RGL1 (A)	PREDICTED: scarecrow-like protein 21 [Daucus carota subsp. sativus]	RecName: Full=Chitin-inducible gibberellin-responsive protein 1;	SubName: Full=Uncharacterized protein {ECO:0000313|EMBL:KZN01257.1};	--	GO:0005634,nucleus; GO:0003700,DNA-binding transcription factor activity; GO:0043565,sequence-specific DNA binding; GO:0006355,regulation of transcription, DNA-templated; GO:0006351,transcription, DNA-templated	GRAS domain family
Cluster-10658.98059	TRUE	TRUE	TRUE	K14709 solute carrier family 39 (zinc transporter), member 1/2/3 | (RefSeq) zinc transporter 2 (A)	PREDICTED: zinc transporter 2 [Daucus carota subsp. sativus]	RecName: Full=Zinc transporter 11; AltName: Full=ZRT/IRT-like protein 11; Flags: Precursor;	SubName: Full=Uncharacterized protein {ECO:0000313|EMBL:KZN05119.1};	Fe2+/Zn2+ regulated transporter	GO:0016021,integral component of membrane; GO:0016020,membrane; GO:0005886,plasma membrane; GO:0005385,zinc ion transmembrane transporter activity; GO:0071577,zinc ion transmembrane transport	ZIP Zinc transporter
Cluster-10658.100778	TRUE	TRUE	TRUE	K22683 aspartyl protease family protein [EC:3.4.23.-] | (RefSeq) LOW QUALITY PROTEIN: aspartyl protease family protein At5g10770 (A)	unnamed protein product [Coffea canephora]	RecName: Full=Aspartyl protease family protein 2 {ECO:0000305}; EC=3.4.23.- {ECO:0000305}; Flags: Precursor;	SubName: Full=Uncharacterized protein {ECO:0000313|EMBL:CDP15730.1};	Aspartyl protease	GO:0016020,membrane; GO:0009505,plant-type cell wall; GO:0004190,aspartic-type endopeptidase activity; GO:0030163,protein catabolic process; GO:0006508,proteolysis; GO:0080167,response to karrikin	Eukaryotic aspartyl protease
Cluster-10658.95416	TRUE	TRUE	TRUE	K00512 steroid 17alpha-monooxygenase / 17alpha-hydroxyprogesterone deacetylase [EC:1.14.14.19 1.14.14.32] | (RefSeq) cytochrome P450 71D8-like (A)	cytochrome P450 [Panax notoginseng]	RecName: Full=Cytochrome P450 CYP71D313; EC=1.14.-.-;	SubName: Full=Cytochrome P450 {ECO:0000313|EMBL:AED99878.1};	Cytochrome P450 CYP2 subfamily	GO:0016021,integral component of membrane; GO:0020037,heme binding; GO:0005506,iron ion binding; GO:0004497,monooxygenase activity; GO:0016705,oxidoreductase activity, acting on paired donors, with incorporation or reduction of molecular oxygen	Cytochrome P450
Cluster-10658.93978	TRUE	TRUE	TRUE	K08486 syntaxin 1B/2/3 | (RefSeq) syntaxin-121 (A)	PREDICTED: syntaxin-121 [Daucus carota subsp. sativus]	RecName: Full=Syntaxin-121; Short=AtSYP121; AltName: Full=Syntaxin-related protein At-Syr1;	SubName: Full=Syntaxin/epimorphin, conserved site-containing protein {ECO:0000313|EMBL:KVH90567.1};	SNARE protein Syntaxin 1 and related proteins	GO:0009504,cell plate; GO:0016021,integral component of membrane; GO:0005886,plasma membrane; GO:0009506,plasmodesma; GO:0031201,SNARE complex; GO:0005802,trans-Golgi network; GO:0043495,protein membrane anchor; GO:0005484,SNAP receptor activity; GO:0000149,SNARE binding; GO:0006952,defense response; GO:0050832,defense response to fungus; GO:0006887,exocytosis; GO:0072660,maintenance of protein l…	Calmodulin-binding
Cluster-10658.99062	TRUE	TRUE	TRUE	--	PREDICTED: uncharacterized protein LOC108197747 [Daucus carota subsp. sativus]	--	SubName: Full=Uncharacterized protein {ECO:0000313|EMBL:CDP06536.1};	--	--	PAR1 protein
Cluster-10658.107365	TRUE	TRUE	TRUE	K00512 steroid 17alpha-monooxygenase / 17alpha-hydroxyprogesterone deacetylase [EC:1.14.14.19 1.14.14.32] | (RefSeq) premnaspirodiene oxygenase-like (A)	RecName: Full=Cytochrome P450 CYP71D312 AEY75216.1 cytochrome P450 CYP71D312 [Panax ginseng]	RecName: Full=Cytochrome P450 CYP71D312; EC=1.14.-.-;	SubName: Full=Cytochrome P450 {ECO:0000313|EMBL:AED99873.1};	Cytochrome P450 CYP2 subfamily	GO:0020037,heme binding; GO:0005506,iron ion binding; GO:0004497,monooxygenase activity; GO:0016705,oxidoreductase activity, acting on paired donors, with incorporation or reduction of molecular oxygen	Cytochrome P450
Cluster-10658.96088	TRUE	TRUE	TRUE	K00454 lipoxygenase [EC:1.13.11.12] | (RefSeq) linoleate 13S-lipoxygenase 3-1, chloroplastic-like (A)	PREDICTED: linoleate 13S-lipoxygenase 3-1, chloroplastic-like [Daucus carota subsp. sativus]	RecName: Full=Linoleate 13S-lipoxygenase 3-1, chloroplastic; EC=1.13.11.12; Flags: Precursor;	RecName: Full=Lipoxygenase {ECO:0000256|RuleBase:RU003975}; EC=1.13.11.- {ECO:0000256|RuleBase:RU003975};	--	GO:0009570,chloroplast stroma; GO:0009534,chloroplast thylakoid; GO:0016165,linoleate 13S-lipoxygenase activity; GO:0046872,metal ion binding; GO:0031408,oxylipin biosynthetic process	Lipoxygenase
Cluster-10658.105937	TRUE	TRUE	TRUE	K09419 heat shock transcription factor, other eukaryote | (RefSeq) heat shock factor protein HSF24 (A)	PREDICTED: heat shock factor protein HSF24 [Nicotiana attenuata]	RecName: Full=Heat shock factor protein HSF24; AltName: Full=Heat shock transcription factor 24; Short=HSTF 24; AltName: Full=Heat stress transcription factor;	SubName: Full=Uncharacterized protein {ECO:0000313|EMBL:CBI21429.3};	Heat shock transcription factor	GO:0005634,nucleus; GO:0003700,DNA-binding transcription factor activity; GO:0043565,sequence-specific DNA binding; GO:0006351,transcription, DNA-templated	HSF-type DNA-binding
Cluster-10658.105889	TRUE	TRUE	TRUE	K03327 multidrug resistance protein, MATE family | (RefSeq) protein DETOXIFICATION 49 (A)	PREDICTED: MATE efflux family protein LAL5-like [Populus euphratica]	RecName: Full=Protein DETOXIFICATION 49 {ECO:0000303|PubMed:11739388}; Short=AtDTX49 {ECO:0000303|PubMed:11739388}; AltName: Full=Multidrug and toxic compound extrusion protein 49 {ECO:0000305}; Short=MATE protein 49 {ECO:0000305}; AltName: Full=Protein NOVEL ION CARRIER 1 {ECO:0000303|Ref.1}; Short=Protein NIC1 {ECO:0000303|Ref.1};	RecName: Full=Protein DETOXIFICATION {ECO:0000256|RuleBase:RU004914}; AltName: Full=Multidrug and toxic compound extrusion protein {ECO:0000256|RuleBase:RU004914};	Uncharacterized membrane protein, predicted efflux pump	GO:0016021,integral component of membrane; GO:0015297,antiporter activity; GO:0015238,drug transmembrane transporter activity; GO:0006855,drug transmembrane transport	Interferon-induced transmembrane protein
Cluster-10658.99036	TRUE	TRUE	TRUE	K23222 nuclease HARBI1 [EC:3.1.-.-] | (RefSeq) protein ALP1-like (A)	protein ALP1-like [Jatropha curcas]	RecName: Full=Protein ALP1-like {ECO:0000305}; EC=3.1.-.-;	SubName: Full=uncharacterized protein LOC109009966 {ECO:0000313|RefSeq:XP_018846196.1};	Predicted transposase	GO:0005634,nucleus; GO:0046872,metal ion binding; GO:0004518,nuclease activity	Plant transposon protein
Cluster-10658.97056	TRUE	TRUE	TRUE	--	PREDICTED: uncharacterized protein LOC108212175 [Daucus carota subsp. sativus]	--	SubName: Full=Uncharacterized protein {ECO:0000313|EMBL:KZN00770.1};	--	--	Arabidopsis protein of unknown function
Cluster-10658.106773	TRUE	TRUE	TRUE	K03283 heat shock 70kDa protein 1/2/6/8 | (RefSeq) heat shock cognate 70 kDa protein 2-like (A)	PREDICTED: heat shock cognate 70 kDa protein 2-like [Daucus carota subsp. sativus]	RecName: Full=Heat shock cognate 70 kDa protein 2;	SubName: Full=Uncharacterized protein {ECO:0000313|EMBL:KDP44981.1};	Molecular chaperones HSP70/HSC70, HSP70 superfamily	GO:0005524,ATP binding	MreB/Mbl protein
Cluster-10658.119802	TRUE	TRUE	TRUE	K13448 calcium-binding protein CML | (RefSeq) calmodulin-like protein 3 (A)	PREDICTED: calmodulin-like protein 3 [Daucus carota subsp. sativus]	RecName: Full=Calmodulin-like protein 5; AltName: Full=Protein MULTICOPY SUPPRESSORS OF SNF4 DEFICIENCY IN YEAST 3;	SubName: Full=Uncharacterized protein {ECO:0000313|EMBL:CDP10060.1};	Calmodulin and related proteins (EF-Hand superfamily)	GO:0012505,endomembrane system; GO:0031303,integral component of endosome membrane; GO:0005509,calcium ion binding	Caleosin related protein
Cluster-10658.113325	TRUE	TRUE	TRUE	K18134 EGF domain-specific O-GlcNAc transferase [EC:2.4.1.255] | (RefSeq) protein O-linked-mannose beta-1,4-N-acetylglucosaminyltransferase 2 (A)	PREDICTED: uncharacterized protein LOC108215983 [Daucus carota subsp. sativus]	--	SubName: Full=Uncharacterized protein {ECO:0000313|EMBL:KZM99031.1};	Uncharacterized conserved protein	GO:0016021,integral component of membrane; GO:0016757,transferase activity, transferring glycosyl groups	Protein of unknown function (DUF563)
Cluster-10658.108574	TRUE	TRUE	TRUE	K00512 steroid 17alpha-monooxygenase / 17alpha-hydroxyprogesterone deacetylase [EC:1.14.14.19 1.14.14.32] | (RefSeq) premnaspirodiene oxygenase-like (A)	cytochrome P450 [Panax notoginseng]	RecName: Full=Cytochrome P450 CYP71D313; EC=1.14.-.-;	SubName: Full=Cytochrome P450 {ECO:0000313|EMBL:AED99878.1};	Cytochrome P450 CYP2 subfamily	GO:0016021,integral component of membrane; GO:0020037,heme binding; GO:0005506,iron ion binding; GO:0004497,monooxygenase activity; GO:0016705,oxidoreductase activity, acting on paired donors, with incorporation or reduction of molecular oxygen	Cytochrome P450
Cluster-10658.97178	TRUE	TRUE	TRUE	--	PREDICTED: uncharacterized protein LOC108211027 [Daucus carota subsp. sativus]	--	SubName: Full=Uncharacterized protein {ECO:0000313|EMBL:CDP10982.1};	--	GO:0016021,integral component of membrane	--
Cluster-10658.92271	TRUE	TRUE	TRUE	K20893 probable galacturonosyltransferase-like 1 [EC:2.4.1.-] | (RefSeq) probable galacturonosyltransferase-like 1 (A)	glycosyltransferase [Panax notoginseng]	RecName: Full=Probable galacturonosyltransferase-like 10; EC=2.4.1.-; AltName: Full=Galactinol synthase 8; Short=AtGolS8; Short=GolS-8;	RecName: Full=Hexosyltransferase {ECO:0000256|RuleBase:RU362027}; EC=2.4.1.- {ECO:0000256|RuleBase:RU362027};	--	GO:0005794,Golgi apparatus; GO:0000139,Golgi membrane; GO:0016021,integral component of membrane; GO:0047262,polygalacturonate 4-alpha-galacturonosyltransferase activity; GO:0016757,transferase activity, transferring glycosyl groups; GO:0071555,cell wall organization; GO:0045489,pectin biosynthetic process; GO:0000271,polysaccharide biosynthetic process; GO:0006979,response to oxidative stress	Glucosyltransferase 24
Cluster-10658.91449	TRUE	TRUE	TRUE	K23480 zinc finger protein 362/384 | (RefSeq) zinc finger protein ZAT5 (A)	PREDICTED: zinc finger protein ZAT12-like [Daucus carota subsp. sativus]	RecName: Full=Zinc finger protein ZAT11;	SubName: Full=Uncharacterized protein {ECO:0000313|EMBL:KZM97032.1};	FOG: Zn-finger	GO:0005634,nucleus; GO:0003700,DNA-binding transcription factor activity; GO:0046872,metal ion binding; GO:0003676,nucleic acid binding; GO:0071289,cellular response to nickel ion; GO:2000280,regulation of root development; GO:0006355,regulation of transcription, DNA-templated; GO:0010200,response to chitin; GO:0006351,transcription, DNA-templated	C2H2-type zinc ribbon
Cluster-10658.122052	TRUE	TRUE	TRUE	K13424 WRKY transcription factor 33 | (RefSeq) probable WRKY transcription factor 33 (A)	PREDICTED: probable WRKY transcription factor 33 [Daucus carota subsp. sativus]	RecName: Full=WRKY transcription factor WRKY24 {ECO:0000303|PubMed:16919842}; Short=OsWRKY24 {ECO:0000303|PubMed:16919842};	SubName: Full=Uncharacterized protein {ECO:0000313|EMBL:KZM83685.1};	--	GO:0005634,nucleus; GO:0003700,DNA-binding transcription factor activity; GO:0043565,sequence-specific DNA binding; GO:0009738,abscisic acid-activated signaling pathway; GO:0009740,gibberellic acid mediated signaling pathway; GO:0009788,negative regulation of abscisic acid-activated signaling pathway; GO:0009938,negative regulation of gibberellic acid mediated signaling pathway; GO:0045893,positi…	WRKY DNA -binding domain
Cluster-10658.147310	TRUE	TRUE	TRUE	K03884 NADH-ubiquinone oxidoreductase chain 6 [EC:7.1.1.2] | (RefSeq) uncharacterized protein LOC109243048 (A)	neutral invertase [Daucus carota]	RecName: Full=Neutral/alkaline invertase 1, mitochondrial {ECO:0000305}; Short=OsNIN1 {ECO:0000303|PubMed:17086397}; EC=3.2.1.26 {ECO:0000269|PubMed:17086397}; Flags: Precursor;	SubName: Full=Neutral invertase {ECO:0000313|EMBL:CAA76145.1}; EC=3.2.1.26 {ECO:0000313|EMBL:CAA76145.1};	--	GO:0005739,mitochondrion; GO:0033926,glycopeptide alpha-N-acetylgalactosaminidase activity; GO:0004575,sucrose alpha-glucosidase activity; GO:0005987,sucrose catabolic process	Amylo-alpha-1,6-glucosidase
Cluster-10658.103024	TRUE	TRUE	TRUE	K22395 cinnamyl-alcohol dehydrogenase [EC:1.1.1.195] | (RefSeq) flavin-dependent oxidoreductase FOX2-like (A)	PREDICTED: flavin-dependent oxidoreductase FOX5-like [Daucus carota subsp. sativus]	RecName: Full=Berberine bridge enzyme-like 8 {ECO:0000303|PubMed:26037923}; Short=AtBBE-like 8 {ECO:0000303|PubMed:26037923}; EC=1.1.1.- {ECO:0000250|UniProtKB:O64743}; Flags: Precursor;	SubName: Full=Uncharacterized protein {ECO:0000313|EMBL:KZM99009.1};	--	GO:0005618,cell wall; GO:0005576,extracellular region; GO:0050660,flavin adenine dinucleotide binding; GO:0016614,oxidoreductase activity, acting on CH-OH group of donors	Berberine and berberine like
Cluster-10658.84303	TRUE	TRUE	TRUE	K02492 glutamyl-tRNA reductase [EC:1.2.1.70] | (RefSeq) glutamyl-tRNA reductase 2-like (A)	PREDICTED: glutamyl-tRNA reductase 2-like [Daucus carota subsp. sativus]	RecName: Full=Glutamyl-tRNA reductase 1, chloroplastic; Short=GluTR; EC=1.2.1.70; Flags: Precursor;	RecName: Full=Glutamyl-tRNA reductase {ECO:0000256|RuleBase:RU000584}; EC=1.2.1.70 {ECO:0000256|RuleBase:RU000584};	--	GO:0009507,chloroplast; GO:0008883,glutamyl-tRNA reductase activity; GO:0050661,NADP binding; GO:0015995,chlorophyll biosynthetic process; GO:0006782,protoporphyrinogen IX biosynthetic process	short chain dehydrogenase
Cluster-10658.171295	TRUE	TRUE	TRUE	K21354 beta-D-glucosyl crocetin beta-1,6-glucosyltransferase [EC:2.4.1.330] | (RefSeq) beta-D-glucosyl crocetin beta-1,6-glucosyltransferase (A)	UDP-glucosyltransferase [Centella asiatica]	RecName: Full=Beta-D-glucosyl crocetin beta-1,6-glucosyltransferase; EC=2.4.1.330 {ECO:0000269|PubMed:22569263}; AltName: Full=UDP-glucose glucosyltransferase 9; Short=GjUGT9; AltName: Full=UDP-glycosyltransferase 94E5;	RecName: Full=Glycosyltransferase {ECO:0000256|RuleBase:RU362057}; EC=2.4.1.- {ECO:0000256|RuleBase:RU362057};	UDP-glucuronosyl and UDP-glucosyl transferase	GO:0016758,transferase activity, transferring hexosyl groups; GO:0008152,metabolic process	Glycosyl transferase family 1
Cluster-10658.117844	TRUE	TRUE	TRUE	K15813 beta-amyrin synthase [EC:5.4.99.39] | (RefSeq) dammarenediol II synthase-like isoform X1 (A)	dammarenediol-II synthase [Panax notoginseng]	RecName: Full=Dammarenediol II synthase; EC=4.2.1.125;	RecName: Full=Terpene cyclase/mutase family member {ECO:0000256|RuleBase:RU362003}; EC=5.4.99.- {ECO:0000256|RuleBase:RU362003};	Oxidosqualene-lanosterol cyclase and related proteins	GO:0016021,integral component of membrane; GO:0016866,intramolecular transferase activity; GO:0016829,lyase activity	Prenyltransferase and squalene oxidase repeat
Cluster-10658.90507	TRUE	TRUE	TRUE	K19476 vacuolar protein sorting-associated protein IST1 | (RefSeq) filaggrin-like (A)	PREDICTED: filaggrin-like [Daucus carota subsp. sativus]	--	SubName: Full=Uncharacterized protein {ECO:0000313|EMBL:KZM83950.1};	Spindle pole body protein	GO:0015031,protein transport	Regulator of Vps4 activity in the MVB pathway
Cluster-10658.108352	TRUE	TRUE	TRUE	K15015 solute carrier family 32 (vesicular inhibitory amino acid transporter) | (RefSeq) lysine histidine transporter-like 2 (A)	lysine histidine transporter [Panax ginseng]	RecName: Full=Lysine histidine transporter 1;	SubName: Full=Lysine histidine transporter {ECO:0000313|EMBL:AGN03890.1};	Amino acid transporters	GO:0016021,integral component of membrane; GO:0005886,plasma membrane; GO:0015171,amino acid transmembrane transporter activity; GO:0015293,symporter activity; GO:0043090,amino acid import; GO:0080167,response to karrikin	Tryptophan/tyrosine permease family
Cluster-10658.109966	TRUE	TRUE	TRUE	K15397 3-ketoacyl-CoA synthase [EC:2.3.1.199] | (RefSeq) 3-ketoacyl-CoA synthase 11-like (A)	PREDICTED: 3-ketoacyl-CoA synthase 11-like [Daucus carota subsp. sativus]	RecName: Full=3-ketoacyl-CoA synthase 11 {ECO:0000303|PubMed:18465198}; Short=KCS-11 {ECO:0000303|PubMed:18465198}; EC=2.3.1.199 {ECO:0000269|PubMed:16765910}; AltName: Full=Very long-chain fatty acid condensing enzyme 11 {ECO:0000303|PubMed:18465198}; Short=VLCFA condensing enzyme 11 {ECO:0000303|PubMed:18465198};	RecName: Full=3-ketoacyl-CoA synthase {ECO:0000256|PIRNR:PIRNR036417}; EC=2.3.1.- {ECO:0000256|PIRNR:PIRNR036417};	--	GO:0016021,integral component of membrane; GO:0102336,3-oxo-arachidoyl-CoA synthase activity; GO:0102337,3-oxo-cerotoyl-CoA synthase activity; GO:0102338,3-oxo-lignoceronyl-CoA synthase activity; GO:0102756,very-long-chain 3-ketoacyl-CoA synthase activity; GO:0006633,fatty acid biosynthetic process; GO:0009409,response to cold; GO:0009416,response to light stimulus	Chalcone and stilbene synthases, C-terminal domain
Cluster-10658.96945	TRUE	TRUE	TRUE	--	PREDICTED: F-box protein At2g27310-like [Daucus carota subsp. sativus]	RecName: Full=F-box protein At2g27310;	SubName: Full=Uncharacterized protein {ECO:0000313|EMBL:KZN03466.1};	--	--	F-box-like
Cluster-10658.99849	TRUE	TRUE	TRUE	K08150 MFS transporter, SP family, solute carrier family 2 (myo-inositol transporter), member 13 | (RefSeq) inositol transporter 1 (A)	PREDICTED: sugar transport protein 13-like [Daucus carota subsp. sativus]	RecName: Full=Sugar transport protein 13; AltName: Full=Hexose transporter 13; AltName: Full=Multicopy suppressor of snf4 deficiency protein 1;	SubName: Full=sugar transport protein 13 {ECO:0000313|RefSeq:XP_016715351.1};	Predicted transporter (major facilitator superfamily)	GO:0016021,integral component of membrane; GO:0005886,plasma membrane; GO:0009506,plasmodesma; GO:0009679,hexose:proton symporter activity; GO:0005358,high-affinity glucose:proton symporter activity; GO:0015145,monosaccharide transmembrane transporter activity; GO:0046323,glucose import; GO:0015749,monosaccharide transmembrane transport; GO:0009737,response to abscisic acid; GO:0009651,response t…	Major Facilitator Superfamily
Cluster-10658.93622	TRUE	TRUE	TRUE	K21989 calcium permeable stress-gated cation channel | (RefSeq) CSC1-like protein ERD4 (A)	PREDICTED: CSC1-like protein ERD4 [Daucus carota subsp. sativus]	RecName: Full=CSC1-like protein ERD4; AltName: Full=Protein EARLY-RESPONSIVE TO DEHYDRATION STRESS 4;	SubName: Full=Uncharacterized protein {ECO:0000313|EMBL:KZN11224.1};	Uncharacterized conserved protein	GO:0031969,chloroplast membrane; GO:0016021,integral component of membrane; GO:0006811,ion transport	Cytosolic domain of 10TM putative phosphate transporter
Cluster-10658.98573	TRUE	TRUE	TRUE	K20506 tuliposide A-converting enzyme [EC:4.2.99.22] | (RefSeq) tuliposide A-converting enzyme 2, chloroplastic-like (A)	probable carboxylesterase 2 [Olea europaea var. sylvestris]	RecName: Full=Probable carboxylesterase 2; AltName: Full=AtCXE2; EC=3.1.1.1;	SubName: Full=Putative carboxylesterase 2 {ECO:0000313|EMBL:OIT22368.1};	Arylacetamide deacetylase	GO:0052689,carboxylic ester hydrolase activity; GO:0016787,hydrolase activity; GO:0009056,catabolic process	Chlorophyllase enzyme
Cluster-10658.98878	TRUE	TRUE	TRUE	K13783 MFS transporter, OPA family, solute carrier family 37 (glycerol-3-phosphate transporter), member 1/2 | (RefSeq) putative glycerol-3-phosphate transporter 4 (A)	PREDICTED: stem-specific protein TSJT1-like [Daucus carota subsp. sativus]	RecName: Full=Stem-specific protein TSJT1;	SubName: Full=Uncharacterized protein {ECO:0000313|EMBL:KZN11453.1};	--	--	Glutamine amidotransferase domain
Cluster-10658.96912	TRUE	TRUE	TRUE	--	hypothetical protein DCAR_014203 [Daucus carota subsp. sativus]	--	SubName: Full=Uncharacterized protein {ECO:0000313|EMBL:KZM98435.1};	--	--	Protein of unknown function (DUF740)
Cluster-10658.106770	TRUE	TRUE	TRUE	--	PREDICTED: uncharacterized protein At5g05190-like [Daucus carota subsp. sativus]	RecName: Full=Protein ENHANCED DISEASE RESISTANCE 4 {ECO:0000303|PubMed:25747881};	SubName: Full=Uncharacterized protein {ECO:0000313|EMBL:KZM92480.1};	--	GO:0005768,endosome; GO:0005886,plasma membrane; GO:0006952,defense response; GO:0006897,endocytosis; GO:1900150,regulation of defense response to fungus; GO:0030100,regulation of endocytosis; GO:0009620,response to fungus; GO:0009863,salicylic acid mediated signaling pathway	Probable zinc-ribbon domain
Cluster-10658.106570	TRUE	TRUE	TRUE	K02367 glucuronyl/N-acetylglucosaminyl transferase EXT2 [EC:2.4.1.224 2.4.1.225] | (Kazusa) Lj2g3v2714440.1; - (A)	PREDICTED: glycosyltransferase family protein 64 protein C5-like isoform X1 [Nelumbo nucifera]	RecName: Full=Glycosyltransferase family protein 64 protein C5 {ECO:0000303|PubMed:24905498}; Short=GT64 C5 {ECO:0000303|PubMed:24905498}; EC=2.4.1.- {ECO:0000305};	SubName: Full=glycosyltransferase family protein 64 protein C5-like isoform X1 {ECO:0000313|RefSeq:XP_010243154.1};	Acetylglucosaminyltransferase EXT2/exostosin 2	GO:0016021,integral component of membrane; GO:0046872,metal ion binding; GO:0016757,transferase activity, transferring glycosyl groups; GO:0006486,protein glycosylation	Glycosyl hydrolases family 43
Cluster-10658.120112	TRUE	TRUE	TRUE	K11446 histone demethylase JARID1 [EC:1.14.11.-] | (RefSeq) lysine-specific demethylase JMJ706-like (A)	PREDICTED: lysine-specific demethylase JMJ706-like isoform X1 [Daucus carota subsp. sativus]	RecName: Full=Lysine-specific demethylase JMJ706; EC=1.14.11.-; AltName: Full=Jumonji domain-containing protein 706; AltName: Full=Lysine-specific histone demethylase JMJ706; AltName: Full=Protein JUMONJI 706;	SubName: Full=Uncharacterized protein {ECO:0000313|EMBL:KZN11618.1};	DNA-binding protein jumonji/RBP2/SMCY, contains JmjC domain	GO:0000792,heterochromatin; GO:0005634,nucleus; GO:0051213,dioxygenase activity; GO:0032454,histone demethylase activity (H3-K9 specific); GO:0046872,metal ion binding; GO:0048439,flower morphogenesis; GO:0045815,positive regulation of gene expression, epigenetic; GO:0006355,regulation of transcription, DNA-templated; GO:0006351,transcription, DNA-templated	C5HC2 zinc finger
Cluster-10658.106647	TRUE	TRUE	TRUE	K08332 vacuolar protein 8 | (RefSeq) hypothetical protein (A)	PREDICTED: U-box domain-containing protein 21 [Daucus carota subsp. sativus]	RecName: Full=U-box domain-containing protein 21; EC=2.3.2.27; AltName: Full=Plant U-box protein 21; AltName: Full=RING-type E3 ubiquitin transferase PUB21 {ECO:0000305};	RecName: Full=RING-type E3 ubiquitin transferase {ECO:0000256|SAAS:SAAS00702733}; EC=2.3.2.27 {ECO:0000256|SAAS:SAAS00702733};	--	GO:0004842,ubiquitin-protein transferase activity; GO:0010200,response to chitin	Zinc-finger of the MIZ type in Nse subunit
Cluster-10658.95412	TRUE	TRUE	TRUE	K00512 steroid 17alpha-monooxygenase / 17alpha-hydroxyprogesterone deacetylase [EC:1.14.14.19 1.14.14.32] | (RefSeq) cytochrome P450 71D8-like (A)	cytochrome P450 [Panax notoginseng]	RecName: Full=Cytochrome P450 CYP71D313; EC=1.14.-.-;	SubName: Full=Cytochrome P450 {ECO:0000313|EMBL:AED99878.1};	Cytochrome P450 CYP2 subfamily	GO:0016021,integral component of membrane; GO:0020037,heme binding; GO:0005506,iron ion binding; GO:0004497,monooxygenase activity; GO:0016705,oxidoreductase activity, acting on paired donors, with incorporation or reduction of molecular oxygen	Cytochrome P450
Cluster-10658.63549	TRUE	TRUE	TRUE	K14487 auxin responsive GH3 gene family | (RefSeq) probable indole-3-acetic acid-amido synthetase GH3.1 (A)	PREDICTED: probable indole-3-acetic acid-amido synthetase GH3.1 [Daucus carota subsp. sativus]	RecName: Full=Probable indole-3-acetic acid-amido synthetase GH3.1; EC=6.3.2.-; AltName: Full=Auxin-responsive GH3-like protein 1; Short=AtGH3-1;	SubName: Full=Uncharacterized protein {ECO:0000313|EMBL:KZN10955.1};	--	GO:0016874,ligase activity; GO:0009733,response to auxin	GH3 auxin-responsive promoter
Cluster-10658.97244	TRUE	TRUE	TRUE	--	unnamed protein product [Coffea canephora]	RecName: Full=AT-hook motif nuclear-localized protein 17 {ECO:0000312|EMBL:FAA00288.1};	RecName: Full=AT-hook motif nuclear-localized protein {ECO:0000256|PIRNR:PIRNR016021};	--	GO:0005634,nucleus; GO:0003680,AT DNA binding; GO:0003700,DNA-binding transcription factor activity; GO:0006351,transcription, DNA-templated	Plants and Prokaryotes Conserved (PCC) domain
Cluster-10658.97849	TRUE	TRUE	TRUE	K08235 xyloglucan:xyloglucosyl transferase [EC:2.4.1.207] | (RefSeq) xyloglucan endotransglucosylase/hydrolase 2-like (A)	PREDICTED: xyloglucan endotransglucosylase/hydrolase 2-like [Daucus carota subsp. sativus]	RecName: Full=Xyloglucan endotransglucosylase/hydrolase protein 15 {ECO:0000303|PubMed:12514239}; Short=At-XTH15 {ECO:0000303|PubMed:12514239}; Short=XTH-15 {ECO:0000303|PubMed:12514239}; EC=2.4.1.207 {ECO:0000269|PubMed:25446234}; EC=3.2.1.151 {ECO:0000269|PubMed:25446234}; Flags: Precursor;	RecName: Full=Xyloglucan endotransglucosylase/hydrolase {ECO:0000256|RuleBase:RU361120}; EC=2.4.1.207 {ECO:0000256|RuleBase:RU361120};	--	GO:0048046,apoplast; GO:0005618,cell wall; GO:0033946,xyloglucan-specific endo-beta-1,4-glucanase activity; GO:0016762,xyloglucan:xyloglucosyl transferase activity; GO:0042546,cell wall biogenesis; GO:0071555,cell wall organization; GO:0010411,xyloglucan metabolic process	Xyloglucan endo-transglycosylase (XET) C-terminus
Cluster-10658.108169	TRUE	TRUE	TRUE	K21888 glutathione dehydrogenase/transferase [EC:1.8.5.1 2.5.1.18] | (RefSeq) glutathione S-transferase DHAR2-like (A)	PREDICTED: glutathione S-transferase DHAR2-like, partial [Nicotiana tomentosiformis]	RecName: Full=Probable glutathione S-transferase DHAR1, cytosolic {ECO:0000305}; EC=2.5.1.18 {ECO:0000305}; AltName: Full=GSH-dependent dehydroascorbate reductase 1 {ECO:0000303|PubMed:10648822}; Short=OsDHAR1 {ECO:0000303|PubMed:20109239}; EC=1.8.5.1 {ECO:0000269|PubMed:19011360}; AltName: Full=Glutathione-dependent dehydroascorbate reductase 1 {ECO:0000305};	SubName: Full=Dehydroascorbate reductase {ECO:0000313|EMBL:AHB11191.1};	Intracellular Cl- channel CLIC, contains GST domain	GO:0005737,cytoplasm; GO:0005829,cytosol; GO:0045174,glutathione dehydrogenase (ascorbate) activity; GO:0004364,glutathione transferase activity; GO:0033355,ascorbate glutathione cycle; GO:0098869,cellular oxidant detoxification; GO:0006749,glutathione metabolic process	Glutathione S-transferase, C-terminal domain
Cluster-10658.118612	TRUE	TRUE	TRUE	K19042 E3 ubiquitin-protein ligase BOI and related proteins [EC:2.3.2.27] | (RefSeq) BOI-related E3 ubiquitin-protein ligase 1-like (A)	PREDICTED: BOI-related E3 ubiquitin-protein ligase 1-like [Daucus carota subsp. sativus]	RecName: Full=BOI-related E3 ubiquitin-protein ligase 1; EC=2.3.2.27 {ECO:0000269|PubMed:20921156}; AltName: Full=RING-type E3 ubiquitin transferase BRG1 {ECO:0000305};	SubName: Full=Uncharacterized protein {ECO:0000313|EMBL:KZN11138.1};	Predicted E3 ubiquitin ligase	GO:0046872,metal ion binding; GO:0004842,ubiquitin-protein transferase activity; GO:0006952,defense response; GO:0043161,proteasome-mediated ubiquitin-dependent protein catabolic process; GO:0043067,regulation of programmed cell death	Prokaryotic RING finger family 4
Cluster-10658.96659	TRUE	TRUE	TRUE	--	uncharacterized protein LOC110669302 [Hevea brasiliensis]	--	SubName: Full=Uncharacterized protein {ECO:0000313|EMBL:CCB56683.1};	--	GO:0016021,integral component of membrane	--
Cluster-10658.105879	TRUE	TRUE	TRUE	K02183 calmodulin | (RefSeq) TMV resistance protein N-like (A)	PREDICTED: disease resistance protein RPS4-like [Daucus carota subsp. sativus]	RecName: Full=TMV resistance protein N;	RecName: Full=Carboxypeptidase {ECO:0000256|RuleBase:RU361156}; EC=3.4.16.- {ECO:0000256|RuleBase:RU361156};	--	GO:0005737,cytoplasm; GO:0043531,ADP binding; GO:0005524,ATP binding; GO:0009626,plant-type hypersensitive response; GO:0007165,signal transduction	Glutaredoxin
Cluster-10658.119480	TRUE	TRUE	TRUE	K02183 calmodulin | (RefSeq) probable calcium-binding protein CML45 (A)	PREDICTED: probable calcium-binding protein CML45 [Daucus carota subsp. sativus]	RecName: Full=Probable calcium-binding protein CML45; AltName: Full=Calmodulin-like protein 45;	SubName: Full=Uncharacterized protein {ECO:0000313|EMBL:KZN04721.1};	Calmodulin and related proteins (EF-Hand superfamily)	GO:0005509,calcium ion binding	--
Cluster-10658.100512	TRUE	TRUE	TRUE	K00430 peroxidase [EC:1.11.1.7] | (RefSeq) peroxidase N1-like (A)	PREDICTED: peroxidase N1-like [Daucus carota subsp. sativus]	RecName: Full=Peroxidase N1; EC=1.11.1.7; AltName: Full=Peroxidase B2; AltName: Full=Peroxidase B3; Flags: Precursor;	RecName: Full=Peroxidase {ECO:0000256|RuleBase:RU362060, ECO:0000256|SAAS:SAAS00709852}; EC=1.11.1.7 {ECO:0000256|RuleBase:RU362060, ECO:0000256|SAAS:SAAS00709852};	--	GO:0005576,extracellular region; GO:0020037,heme binding; GO:0046872,metal ion binding; GO:0004601,peroxidase activity; GO:0042744,hydrogen peroxide catabolic process; GO:0006979,response to oxidative stress	Peroxidase
Cluster-10658.112896	TRUE	TRUE	TRUE	K01381 saccharopepsin [EC:3.4.23.25] | (RefSeq) aspartic proteinase-like protein 1 (A)	PREDICTED: aspartyl protease family protein 1 [Daucus carota subsp. sativus]	RecName: Full=Aspartyl protease family protein 1 {ECO:0000305}; EC=3.4.23.- {ECO:0000305}; Flags: Precursor;	SubName: Full=Uncharacterized protein {ECO:0000313|EMBL:KZN01381.1};	Aspartyl protease	GO:0031225,anchored component of membrane; GO:0005886,plasma membrane; GO:0004190,aspartic-type endopeptidase activity; GO:0030163,protein catabolic process; GO:0006508,proteolysis	Eukaryotic aspartyl protease
Cluster-10658.109773	TRUE	TRUE	TRUE	K23480 zinc finger protein 362/384 | (RefSeq) zinc finger protein ZAT5 (A)	hypothetical protein CDL12_14978 [Handroanthus impetiginosus]	RecName: Full=Zinc finger protein ZAT10; AltName: Full=Salt-tolerance zinc finger;	SubName: Full=Uncharacterized protein {ECO:0000313|EMBL:PIN12402.1};	FOG: Zn-finger	GO:0005634,nucleus; GO:0003700,DNA-binding transcription factor activity; GO:0046872,metal ion binding; GO:0043565,sequence-specific DNA binding; GO:0035264,multicellular organism growth; GO:0045892,negative regulation of transcription, DNA-templated; GO:0010117,photoprotection; GO:0015979,photosynthesis; GO:0009737,response to abscisic acid; GO:0010200,response to chitin; GO:0009409,response to …	C2H2-type zinc finger
Cluster-10658.104673	TRUE	TRUE	TRUE	K13448 calcium-binding protein CML | (RefSeq) putative calcium-binding protein CML19 (A)	PREDICTED: putative calcium-binding protein CML19 [Daucus carota subsp. sativus]	RecName: Full=Calcium-binding protein CML37; AltName: Full=Calmodulin-like protein 37;	SubName: Full=Uncharacterized protein {ECO:0000313|EMBL:KZM99286.1};	Calmodulin and related proteins (EF-Hand superfamily)	GO:0005737,cytoplasm; GO:0005634,nucleus; GO:0005509,calcium ion binding; GO:0010193,response to ozone	Secreted protein acidic and rich in cysteine Ca binding region
Cluster-10658.90303	TRUE	TRUE	TRUE	K09422 transcription factor MYB, plant | (RefSeq) transcription factor MYB108 (A)	unnamed protein product, partial [Vitis vinifera]	RecName: Full=Transcription factor MYB2 {ECO:0000305}; AltName: Full=Myb-related protein 2 {ECO:0000305}; Short=OsMYB2 {ECO:0000303|PubMed:22301384};	SubName: Full=Uncharacterized protein {ECO:0000313|EMBL:CBI15464.3};	Transcription factor, Myb superfamily	GO:0005634,nucleus; GO:0000981,DNA-binding transcription factor activity, RNA polymerase II-specific; GO:0043565,sequence-specific DNA binding; GO:0001135,RNA polymerase II transcription regulator recruiting activity; GO:0044212,transcription regulatory region DNA binding; GO:0030154,cell differentiation; GO:1901002,positive regulation of response to salt stress; GO:1902584,positive regulation of…	Myb-like DNA-binding domain
Cluster-10658.87206	TRUE	TRUE	TRUE	--	hypothetical protein AQUCO_02000205v1 [Aquilegia coerulea]	--	SubName: Full=Uncharacterized protein {ECO:0000313|EMBL:PIA42608.1};	--	--	Arabinogalactan peptide
Cluster-10658.90561	TRUE	TRUE	TRUE	--	--	--	--	--	--	--
Cluster-10658.104654	TRUE	TRUE	TRUE	K00512 steroid 17alpha-monooxygenase / 17alpha-hydroxyprogesterone deacetylase [EC:1.14.14.19 1.14.14.32] | (RefSeq) hypothetical protein (A)	RecName: Full=Cytochrome P450 CYP71D312 AEY75216.1 cytochrome P450 CYP71D312 [Panax ginseng]	RecName: Full=Cytochrome P450 CYP71D312; EC=1.14.-.-;	SubName: Full=Cytochrome P450 {ECO:0000313|EMBL:AED99876.1};	Cytochrome P450 CYP2 subfamily	GO:0020037,heme binding; GO:0005506,iron ion binding; GO:0004497,monooxygenase activity; GO:0016705,oxidoreductase activity, acting on paired donors, with incorporation or reduction of molecular oxygen	Cytochrome P450
Cluster-10658.83060	TRUE	TRUE	TRUE	--	hypothetical protein DCAR_008831 [Daucus carota subsp. sativus]	--	SubName: Full=Uncharacterized protein {ECO:0000313|EMBL:KZN00077.1};	--	--	--
Cluster-10658.108295	TRUE	TRUE	TRUE	K10775 phenylalanine ammonia-lyase [EC:4.3.1.24] | (RefSeq) phenylalanine ammonia-lyase 1 (A)	phenylalanine ammonia-lyase [Angelica sinensis]	RecName: Full=Phenylalanine ammonia-lyase 3; EC=4.3.1.24;	RecName: Full=Phenylalanine ammonia-lyase {ECO:0000256|RuleBase:RU003955}; EC=4.3.1.24 {ECO:0000256|RuleBase:RU003955};	Phenylalanine and histidine ammonia-lyase	GO:0005737,cytoplasm; GO:0043234,NA; GO:0045548,phenylalanine ammonia-lyase activity; GO:0009800,cinnamic acid biosynthetic process; GO:0006559,L-phenylalanine catabolic process	Aromatic amino acid lyase
Cluster-10658.103001	TRUE	TRUE	TRUE	K19939 Rab effector Noc2 | (RefSeq) POPTRDRAFT_568988; hypothetical protein (A)	PREDICTED: B-box zinc finger protein 23-like [Daucus carota subsp. sativus]	RecName: Full=B-box domain protein 30 {ECO:0000303|PubMed:19920209}; Short=AtBBX30 {ECO:0000303|PubMed:19920209}; AltName: Full=Microprotein 1A {ECO:0000303|PubMed:27015278};	SubName: Full=Uncharacterized protein {ECO:0000313|EMBL:KZM91431.1};	--	GO:0005634,nucleus; GO:0030674,protein binding, bridging; GO:0008270,zinc ion binding; GO:0007623,circadian rhythm; GO:0009909,regulation of flower development	CDC45-like protein
Cluster-10658.81411	TRUE	TRUE	TRUE	K11982 E3 ubiquitin-protein ligase RNF115/126 [EC:2.3.2.27] | (RefSeq) E3 ubiquitin-protein ligase RDUF1-like (A)	RNA polymerase archaeal subunit P/eukaryotic subunit RPABC [Trema orientalis]	RecName: Full=E3 ubiquitin-protein ligase RDUF1 {ECO:0000305}; EC=2.3.2.27 {ECO:0000305}; AltName: Full=RING and DUF1117 domain-containing protein 1 {ECO:0000305}; Short=AtRDUF1 {ECO:0000303|PubMed:22405823}; AltName: Full=RING-type E3 ubiquitin transferase RDUF1 {ECO:0000305};	SubName: Full=E3 ubiquitin-protein ligase RDUF1-like {ECO:0000313|RefSeq:XP_018806277.1};	FOG: Predicted E3 ubiquitin ligase	GO:0005737,cytoplasm; GO:0005829,cytosol; GO:0005634,nucleus; GO:0046872,metal ion binding; GO:0061630,ubiquitin protein ligase activity; GO:0004842,ubiquitin-protein transferase activity; GO:0009738,abscisic acid-activated signaling pathway; GO:0043161,proteasome-mediated ubiquitin-dependent protein catabolic process; GO:0051865,protein autoubiquitination; GO:0000209,protein polyubiquitination; …	Prokaryotic RING finger family 4
Cluster-10658.119431	TRUE	TRUE	TRUE	K20887 xyloglucan glycosyltransferase 4 [EC:2.4.1.-] | (RefSeq) xyloglucan glycosyltransferase 4-like (A)	gibberellin-regulated protein 3-like [Hevea brasiliensis]	RecName: Full=Gibberellin-regulated protein 14; AltName: Full=GAST1 protein homolog 14; Flags: Precursor;	SubName: Full=Uncharacterized protein {ECO:0000313|EMBL:GAY36462.1};	--	GO:0005576,extracellular region; GO:0005886,plasma membrane; GO:0009740,gibberellic acid mediated signaling pathway; GO:2000377,regulation of reactive oxygen species metabolic process; GO:0009737,response to abscisic acid; GO:0009739,response to gibberellin; GO:0009651,response to salt stress	Gibberellin regulated protein
Cluster-10658.63412	TRUE	TRUE	TRUE	K08910 light-harvesting complex I chlorophyll a/b binding protein 4 | (RefSeq) LHCA1; chlorophyll a-b binding protein 4, chloroplastic (A)	chlorophyll a/b-binding protein 4 [Panax ginseng]	RecName: Full=Chlorophyll a-b binding protein 4, chloroplastic {ECO:0000303|PubMed:10366881}; AltName: Full=LHCI type III CAB-4; Flags: Precursor;	RecName: Full=Chlorophyll a-b binding protein, chloroplastic {ECO:0000256|RuleBase:RU363080};	--	GO:0009507,chloroplast; GO:0009941,chloroplast envelope; GO:0009534,chloroplast thylakoid; GO:0009535,chloroplast thylakoid membrane; GO:0016021,integral component of membrane; GO:0016020,membrane; GO:0009522,photosystem I; GO:0010287,plastoglobule; GO:0009579,thylakoid; GO:0016168,chlorophyll binding; GO:0046872,metal ion binding; GO:0031409,pigment binding; GO:0019904,protein domain specific bi…	Chlorophyll A-B binding protein
Cluster-10658.133425	TRUE	TRUE	TRUE	--	Histidine phosphatase [Trema orientalis]	RecName: Full=Phosphoglycerate mutase-like protein 1 {ECO:0000305};	SubName: Full=Uncharacterized protein {ECO:0000313|EMBL:ONI35509.1};	Predicted phosphoglycerate mutase	GO:0005829,cytosol	--
Cluster-10658.110880	TRUE	TRUE	TRUE	--	hypothetical protein EUGRSUZ_H02229 [Eucalyptus grandis]	--	SubName: Full=Uncharacterized protein {ECO:0000313|EMBL:KCW59487.1};	--	--	--
Cluster-10658.102947	TRUE	TRUE	TRUE	K13429 chitin elicitor receptor kinase 1 | (RefSeq) chitin elicitor receptor kinase 1-like isoform X1 (A)	PREDICTED: cytochrome b561 and DOMON domain-containing protein At5g35735-like [Daucus carota subsp. sativus]	RecName: Full=Cytochrome b561 and DOMON domain-containing protein At5g47530; AltName: Full=Protein b561A.tha10; Flags: Precursor;	SubName: Full=Uncharacterized protein {ECO:0000313|EMBL:KZM95986.1};	Predicted membrane protein, contains DoH and Cytochrome b-561/ferric reductase transmembrane domains	GO:0016021,integral component of membrane; GO:0046872,metal ion binding; GO:0055114,oxidation-reduction process	Eukaryotic cytochrome b561
Cluster-10658.104653	TRUE	TRUE	TRUE	K00512 steroid 17alpha-monooxygenase / 17alpha-hydroxyprogesterone deacetylase [EC:1.14.14.19 1.14.14.32] | (RefSeq) premnaspirodiene oxygenase-like (A)	RecName: Full=Cytochrome P450 CYP71D312 AEY75216.1 cytochrome P450 CYP71D312 [Panax ginseng]	RecName: Full=Cytochrome P450 CYP71D312; EC=1.14.-.-;	SubName: Full=Cytochrome P450 {ECO:0000313|EMBL:AED99876.1};	Cytochrome P450 CYP2 subfamily	GO:0020037,heme binding; GO:0005506,iron ion binding; GO:0004497,monooxygenase activity; GO:0016705,oxidoreductase activity, acting on paired donors, with incorporation or reduction of molecular oxygen	Cytochrome P450
Cluster-10658.78006	TRUE	TRUE	TRUE	K08912 light-harvesting complex II chlorophyll a/b binding protein 1 | (RefSeq) chlorophyll a-b binding protein of LHCII type 1-like (A)	chlorophyll a/b binding protein of LHCII type I precursor [Panax ginseng]	RecName: Full=Chlorophyll a-b binding protein, chloroplastic; AltName: Allergen=Api g 3; Flags: Precursor;	RecName: Full=Chlorophyll a-b binding protein, chloroplastic {ECO:0000256|RuleBase:RU363080};	--	GO:0009535,chloroplast thylakoid membrane; GO:0016021,integral component of membrane; GO:0009522,photosystem I; GO:0009523,photosystem II; GO:0016168,chlorophyll binding; GO:0046872,metal ion binding; GO:0009765,photosynthesis, light harvesting; GO:0018298,protein-chromophore linkage	Chlorophyll A-B binding protein
Cluster-10658.90503	TRUE	TRUE	TRUE	K14292 trimethylguanosine synthase [EC:2.1.1.-] | (RefSeq) uncharacterized LOC107850838 (A)	PREDICTED: WUSCHEL-related homeobox 5-like [Daucus carota subsp. sativus]	RecName: Full=WUSCHEL-related homeobox 2;	SubName: Full=Uncharacterized protein {ECO:0000313|EMBL:KZM95659.1};	--	GO:0005634,nucleus; GO:0003677,DNA binding; GO:0003700,DNA-binding transcription factor activity; GO:0010654,apical cell fate commitment; GO:0090451,cotyledon boundary formation; GO:0048825,cotyledon development; GO:0009880,embryonic pattern specification; GO:0009942,longitudinal axis specification; GO:0008284,positive regulation of cell proliferation; GO:0080167,response to karrikin; GO:0006351,…	Homeodomain
Cluster-10658.83846	TRUE	TRUE	TRUE	K19704 protein phosphatase PTC1 [EC:3.1.3.16] | (RefSeq) probable protein phosphatase 2C 73 (A)	PREDICTED: probable protein phosphatase 2C 34 [Ziziphus jujuba]	RecName: Full=Probable protein phosphatase 2C 48; Short=OsPP2C48; EC=3.1.3.16;	SubName: Full=Uncharacterized protein {ECO:0000313|EMBL:KZM85532.1};	Serine/threonine protein phosphatase	GO:0046872,metal ion binding; GO:0004722,protein serine/threonine phosphatase activity	--
Cluster-10658.78828	TRUE	TRUE	TRUE	--	PREDICTED: uncharacterized protein LOC108209805 [Daucus carota subsp. sativus]	--	SubName: Full=Uncharacterized protein {ECO:0000313|EMBL:KZM85834.1};	--	GO:0016021,integral component of membrane; GO:0008375,acetylglucosaminyltransferase activity	Core-2/I-Branching enzyme
Cluster-10658.99034	TRUE	TRUE	TRUE	K23222 nuclease HARBI1 [EC:3.1.-.-] | (RefSeq) putative nuclease HARBI1 (A)	PREDICTED: putative nuclease HARBI1 [Daucus carota subsp. sativus]	RecName: Full=Protein ALP1-like {ECO:0000305}; EC=3.1.-.-;	SubName: Full=Uncharacterized protein {ECO:0000313|EMBL:EEF48052.1};	Predicted transposase	GO:0005634,nucleus; GO:0046872,metal ion binding; GO:0004518,nuclease activity	Plant transposon protein
Cluster-10658.87866	TRUE	TRUE	TRUE	--	PREDICTED: uncharacterized protein LOC108212493 [Daucus carota subsp. sativus]	--	SubName: Full=Uncharacterized protein {ECO:0000313|EMBL:KZN01953.1};	--	--	--
Cluster-10658.77514	TRUE	TRUE	TRUE	K04035 magnesium-protoporphyrin IX monomethyl ester (oxidative) cyclase [EC:1.14.13.81] | (RefSeq) magnesium-protoporphyrin IX monomethyl ester [oxidative] cyclase, chloroplastic-like (A)	PREDICTED: magnesium-protoporphyrin IX monomethyl ester [oxidative]	RecName: Full=Magnesium-protoporphyrin IX monomethyl ester [oxidative] cyclase, chloroplastic; Short=Mg-protoporphyrin IX monomethyl ester oxidative cyclase; EC=1.14.13.81; Flags: Precursor;	SubName: Full=Uncharacterized protein {ECO:0000313|EMBL:KZM99125.1};	--	GO:0009507,chloroplast; GO:0048529,magnesium-protoporphyrin IX monomethyl ester (oxidative) cyclase activity; GO:0046872,metal ion binding; GO:0015995,chlorophyll biosynthetic process; GO:0015979,photosynthesis	Rubrerythrin
Cluster-10658.100970	TRUE	TRUE	TRUE	K04733 interleukin-1 receptor-associated kinase 4 [EC:2.7.11.1] | (RefSeq) probable serine/threonine-protein kinase PIX13 (A)	PREDICTED: probable serine/threonine-protein kinase Cx32, chloroplastic [Daucus carota subsp. sativus]	RecName: Full=Probable serine/threonine-protein kinase PIX13 {ECO:0000305}; EC=2.7.11.1 {ECO:0000305};	SubName: Full=probable serine/threonine-protein kinase Cx32, chloroplastic isoform X2 {ECO:0000313|RefSeq:XP_016508809.1};	Serine/threonine protein kinase	GO:0005634,nucleus; GO:0005886,plasma membrane; GO:0005524,ATP binding; GO:0004675,transmembrane receptor protein serine/threonine kinase activity; GO:0007166,cell surface receptor signaling pathway; GO:0006952,defense response; GO:0006468,protein phosphorylation	Protein tyrosine kinase
Cluster-10658.107376	TRUE	TRUE	TRUE	K00549 5-methyltetrahydropteroyltriglutamate--homocysteine methyltransferase [EC:2.1.1.14] | (RefSeq) 5-methyltetrahydropteroyltriglutamate-- homocysteine methyltransferase-like (A)	hypothetical protein DCAR_009082 [Daucus carota subsp. sativus]	RecName: Full=5-methyltetrahydropteroyltriglutamate--homocysteine methyltransferase; EC=2.1.1.14; AltName: Full=Cobalamin-independent methionine synthase isozyme; AltName: Full=Vitamin-B12-independent methionine synthase isozyme;	SubName: Full=Uncharacterized protein {ECO:0000313|EMBL:KZN00328.1};	Methionine synthase II (cobalamin-independent)	GO:0005737,cytoplasm; GO:0003871,5-methyltetrahydropteroyltriglutamate-homocysteine S-methyltransferase activity; GO:0008270,zinc ion binding; GO:0009086,methionine biosynthetic process	Cobalamin-independent synthase, N-terminal domain
Cluster-10658.106703	TRUE	TRUE	TRUE	K09286 EREBP-like factor | (RefSeq) ethylene-responsive transcription factor 1A (A)	PREDICTED: ethylene-responsive transcription factor 2-like [Daucus carota subsp. sativus]	RecName: Full=Ethylene-responsive transcription factor 1; Short=NtERF1; AltName: Full=Ethylene-responsive element-binding factor 1; Short=EREBP-1;	SubName: Full=Uncharacterized protein {ECO:0000313|EMBL:KZM87966.1};	--	GO:0005634,nucleus; GO:0003677,DNA binding; GO:0003700,DNA-binding transcription factor activity; GO:0006952,defense response; GO:0009873,ethylene-activated signaling pathway; GO:0006351,transcription, DNA-templated	AP2 domain
Cluster-10658.97758	TRUE	TRUE	TRUE	K10260 F-box and WD-40 domain protein 7 | (RefSeq) WD40 repeat-like protein (A)	PREDICTED: U-box domain-containing protein 26-like [Daucus carota subsp. sativus]	RecName: Full=U-box domain-containing protein 25; EC=2.3.2.27; AltName: Full=Plant U-box protein 25; AltName: Full=RING-type E3 ubiquitin transferase PUB25 {ECO:0000305};	RecName: Full=RING-type E3 ubiquitin transferase {ECO:0000256|SAAS:SAAS00702733}; EC=2.3.2.27 {ECO:0000256|SAAS:SAAS00702733};	--	GO:0004842,ubiquitin-protein transferase activity; GO:0010200,response to chitin	zinc finger of C3HC4-type, RING
Cluster-10658.107305	TRUE	TRUE	TRUE	K01206 alpha-L-fucosidase [EC:3.2.1.51] | (RefSeq) hypothetical protein (A)	PREDICTED: esterase-like [Daucus carota subsp. sativus]	RecName: Full=Esterase; EC=3.1.1.-; AltName: Full=Early nodule-specific protein homolog; AltName: Full=Latex allergen Hev b 13; AltName: Allergen=Hev b 13; Flags: Precursor;	SubName: Full=Uncharacterized protein {ECO:0000313|EMBL:KZN04430.1};	--	GO:0016788,hydrolase activity, acting on ester bonds; GO:0019863,IgE binding; GO:0006952,defense response	GDSL-like Lipase/Acylhydrolase
Cluster-10658.113066	TRUE	TRUE	TRUE	K12191 charged multivesicular body protein 2A | (RefSeq) vacuolar protein sorting-associated protein 2 homolog 1 (A)	PREDICTED: vacuolar protein sorting-associated protein 2 homolog 1 [Daucus carota subsp. sativus]	RecName: Full=Vacuolar protein sorting-associated protein 2 homolog 1; Short=AtVPS2-1; AltName: Full=Charged multivesicular body protein 2 homolog 1; AltName: Full=ESCRT-III complex subunit VPS2 homolog 1; AltName: Full=SNF7-like protein;	SubName: Full=Uncharacterized protein {ECO:0000313|EMBL:KZN03197.1};	Vacuolar assembly/sorting protein DID4	GO:0000815,ESCRT III complex; GO:0005770,late endosome; GO:0005771,multivesicular body; GO:0070676,intralumenal vesicle formation; GO:0015031,protein transport; GO:0007034,vacuolar transport	Snf7
Cluster-10658.109829	TRUE	TRUE	TRUE	K01206 alpha-L-fucosidase [EC:3.2.1.51] | (RefSeq) alpha-L-fucosidase 3 (A)	iEP4 [Daucus carota]	RecName: Full=Esterase; EC=3.1.1.-; AltName: Full=Early nodule-specific protein homolog; AltName: Full=Latex allergen Hev b 13; AltName: Allergen=Hev b 13; Flags: Precursor;	SubName: Full=IEP4 {ECO:0000313|EMBL:AAB50843.1};	--	GO:0016788,hydrolase activity, acting on ester bonds; GO:0019863,IgE binding; GO:0006952,defense response	GDSL-like Lipase/Acylhydrolase
Cluster-10658.128793	TRUE	TRUE	TRUE	K19041 E3 ubiquitin-protein ligase RNF38/44 [EC:2.3.2.27] | (Kazusa) Lj6g3v1468220.1; - (A)	PREDICTED: RING-H2 finger protein ATL2-like [Nicotiana tomentosiformis]	RecName: Full=RING-H2 finger protein ATL2; EC=2.3.2.27 {ECO:0000305}; AltName: Full=Protein ARABIDOPSIS TOXICOS EN LEVADURA 2; Short=Protein ATL2; AltName: Full=RING-type E3 ubiquitin transferase ATL2 {ECO:0000305};	SubName: Full=RING-H2 finger protein ATL2-like {ECO:0000313|RefSeq:XP_016458679.1};	FOG: Predicted E3 ubiquitin ligase	GO:0016021,integral component of membrane; GO:0046872,metal ion binding; GO:0061630,ubiquitin protein ligase activity; GO:0006952,defense response; GO:0043161,proteasome-mediated ubiquitin-dependent protein catabolic process; GO:0010200,response to chitin	Prokaryotic RING finger family 4
Cluster-10658.67024	TRUE	TRUE	TRUE	K00901 diacylglycerol kinase (ATP) [EC:2.7.1.107] | (RefSeq) diacylglycerol kinase 5-like (A)	PREDICTED: diacylglycerol kinase 5-like isoform X1 [Erythranthe guttata]	RecName: Full=Diacylglycerol kinase 5; Short=AtDGK5; Short=DAG kinase 5; EC=2.7.1.107; AltName: Full=Diglyceride kinase 5; Short=DGK 5;	RecName: Full=Diacylglycerol kinase {ECO:0000256|RuleBase:RU361128}; Short=DAG kinase {ECO:0000256|RuleBase:RU361128}; EC=2.7.1.107 {ECO:0000256|RuleBase:RU361128};	Diacylglycerol kinase	GO:0005524,ATP binding; GO:0004143,diacylglycerol kinase activity; GO:0003951,NAD+ kinase activity; GO:0006952,defense response; GO:0007205,protein kinase C-activating G protein-coupled receptor signaling pathway	Diacylglycerol kinase catalytic domain
Cluster-10658.105629	TRUE	TRUE	TRUE	--	PREDICTED: cation/H(+) antiporter 18-like [Daucus carota subsp. sativus]	RecName: Full=Cation/H(+) antiporter 18; AltName: Full=Protein CATION/H+ EXCHANGER 18; Short=AtCHX18;	SubName: Full=Uncharacterized protein {ECO:0000313|EMBL:KZN04177.1};	Predicted K+/H+-antiporter	GO:0016021,integral component of membrane; GO:0005770,late endosome; GO:0015299,solute:proton antiporter activity; GO:0015672,monovalent inorganic cation transport; GO:0006813,potassium ion transport; GO:0006885,regulation of pH	Universal stress protein family
Cluster-10658.113688	TRUE	TRUE	TRUE	K03868 RING-box protein 1 [EC:2.3.2.32] | (RefSeq) uncharacterized LOC100792815 (A)	PREDICTED: GEM-like protein 4 [Daucus carota subsp. sativus]	RecName: Full=Putative GEM-like protein 8;	SubName: Full=Uncharacterized protein {ECO:0000313|EMBL:CCB58931.1};	--	--	GRAM domain
Cluster-10658.76278	TRUE	TRUE	TRUE	K23222 nuclease HARBI1 [EC:3.1.-.-] | (RefSeq) uncharacterized protein LOC108205488 (A)	PREDICTED: uncharacterized protein LOC108205488 [Daucus carota subsp. sativus]	RecName: Full=Protein ALP1-like {ECO:0000305}; EC=3.1.-.-;	SubName: Full=Uncharacterized protein {ECO:0000313|EMBL:CDP08295.1};	Predicted transposase	GO:0005634,nucleus; GO:0046872,metal ion binding; GO:0004518,nuclease activity	Plant transposon protein
Cluster-10658.102426	TRUE	TRUE	TRUE	K18693 diacylglycerol diphosphate phosphatase / phosphatidate phosphatase [EC:3.1.3.81 3.1.3.4] | (RefSeq) lipid phosphate phosphatase 1-like isoform X1 (A)	PREDICTED: lipid phosphate phosphatase 1-like isoform X1 [Daucus carota subsp. sativus]	RecName: Full=Putative lipid phosphate phosphatase 3, chloroplastic; Short=AtLPP3; EC=3.1.3.-; AltName: Full=Phosphatidate phosphohydrolase 3; AltName: Full=Phosphatidic acid phosphatase 3; Flags: Precursor;	SubName: Full=Phosphatidic acid phosphatase type 2/haloperoxidase {ECO:0000313|EMBL:OMO80290.1};	Lipid phosphate phosphatase and related enzymes of the PAP2 family	GO:0031969,chloroplast membrane; GO:0005887,integral component of plasma membrane; GO:0005886,plasma membrane; GO:0008195,phosphatidate phosphatase activity; GO:0006644,phospholipid metabolic process	PAP2 superfamily
Cluster-10658.121776	TRUE	TRUE	TRUE	K13254 spastin [EC:3.6.4.3] | (RefSeq) ATPase family AAA domain-containing protein 1-A-like (A)	PREDICTED: nuclear valosin-containing protein-like isoform X2 [Daucus carota subsp. sativus]	RecName: Full=ATPase family AAA domain-containing protein FIGL1 {ECO:0000305}; AltName: Full=AAA-ATPase FIDGETIN-LIKE 1 {ECO:0000303|PubMed:26161528}; EC=3.6.4.- {ECO:0000305};	SubName: Full=Uncharacterized protein {ECO:0000313|EMBL:KZM92345.1};	AAA+-type ATPase	GO:0005634,nucleus; GO:0005524,ATP binding; GO:0016787,hydrolase activity; GO:0006310,DNA recombination; GO:0006281,DNA repair; GO:0045128,negative regulation of reciprocal meiotic recombination; GO:0010569,regulation of double-strand break repair via homologous recombination	AAA domain
Cluster-10658.105209	TRUE	TRUE	TRUE	K22950 acylphloroglucinol glucosyltransferase [EC:2.4.1.358] | (RefSeq) anthocyanidin 3-O-glucosyltransferase 2-like (A)	UDP-glycosyltransferase [Panax ginseng]	RecName: Full=UDP-glucose flavonoid 3-O-glucosyltransferase 6 {ECO:0000303|PubMed:18487633}; EC=2.4.1.91 {ECO:0000269|PubMed:18487633}; AltName: Full=Flavonol 3-O-glucosyltransferase 6 {ECO:0000303|PubMed:18487633}; Short=FaGT6 {ECO:0000303|PubMed:18487633};	RecName: Full=Glycosyltransferase {ECO:0000256|RuleBase:RU362057}; EC=2.4.1.- {ECO:0000256|RuleBase:RU362057};	UDP-glucuronosyl and UDP-glucosyl transferase	GO:0102360,daphnetin 3-O-glucosyltransferase activity; GO:0047893,flavonol 3-O-glucosyltransferase activity; GO:0102425,myricetin 3-O-glucosyltransferase activity; GO:0008152,metabolic process	UDP-glucoronosyl and UDP-glucosyl transferase
Cluster-10658.114082	TRUE	TRUE	TRUE	K15718 linoleate 9S-lipoxygenase [EC:1.13.11.58] | (RefSeq) probable linoleate 9S-lipoxygenase 5 (A)	PREDICTED: probable linoleate 9S-lipoxygenase 5 [Daucus carota subsp. sativus]	RecName: Full=Probable linoleate 9S-lipoxygenase 5; EC=1.13.11.58; AltName: Full=Leaf lipoxygenase;	RecName: Full=Lipoxygenase {ECO:0000256|RuleBase:RU003975}; EC=1.13.11.- {ECO:0000256|RuleBase:RU003975};	--	GO:0005737,cytoplasm; GO:0046872,metal ion binding; GO:0016702,oxidoreductase activity, acting on single donors with incorporation of molecular oxygen, incorporation of two atoms of oxygen; GO:0031408,oxylipin biosynthetic process	Lipoxygenase
Cluster-10658.112700	TRUE	TRUE	TRUE	K00688 glycogen phosphorylase [EC:2.4.1.1] | (RefSeq) alpha-1,4 glucan phosphorylase L isozyme, chloroplastic/amyloplastic (A)	PREDICTED: alpha-1,4 glucan phosphorylase L isozyme, chloroplastic/amyloplastic [Daucus carota subsp. sativus]	RecName: Full=Alpha-1,4 glucan phosphorylase L-1 isozyme, chloroplastic/amyloplastic; EC=2.4.1.1; AltName: Full=Starch phosphorylase L-1; Flags: Precursor;	RecName: Full=Alpha-1,4 glucan phosphorylase {ECO:0000256|RuleBase:RU000587}; EC=2.4.1.1 {ECO:0000256|RuleBase:RU000587};	Glycogen phosphorylase	GO:0009501,amyloplast; GO:0009507,chloroplast; GO:0008184,glycogen phosphorylase activity; GO:0042802,identical protein binding; GO:0102250,linear malto-oligosaccharide phosphorylase activity; GO:0030170,pyridoxal phosphate binding; GO:0102499,SHG alpha-glucan phosphorylase activity; GO:0005975,carbohydrate metabolic process	Carbohydrate phosphorylase
Cluster-10658.79693	TRUE	TRUE	TRUE	K04733 interleukin-1 receptor-associated kinase 4 [EC:2.7.11.1] | (RefSeq) putative serine/threonine-protein kinase-like protein CCR3 (A)	PREDICTED: putative serine/threonine-protein kinase-like protein CCR3 [Daucus carota subsp. sativus]	RecName: Full=Putative serine/threonine-protein kinase-like protein CCR3; EC=2.7.11.1; AltName: Full=Protein CRINKLY 4 RELATED 3; Short=AtCRR3; Flags: Precursor;	SubName: Full=Uncharacterized protein {ECO:0000313|EMBL:KZN03056.1};	Serine/threonine protein kinase	GO:0016021,integral component of membrane; GO:0005524,ATP binding; GO:0042803,protein homodimerization activity; GO:0004674,protein serine/threonine kinase activity	ABC1 family
Cluster-10658.123732	TRUE	TRUE	TRUE	--	--	--	--	--	--	--
Cluster-10658.92972	TRUE	TRUE	TRUE	--	hypothetical protein DCAR_029923 [Daucus carota subsp. sativus]	--	SubName: Full=Uncharacterized protein {ECO:0000313|EMBL:KZM82354.1};	Predicted methyltransferase	GO:0016021,integral component of membrane	--
Cluster-10658.93814	TRUE	TRUE	TRUE	--	PREDICTED: disease resistance protein RPS4-like [Daucus carota subsp. sativus]	--	RecName: Full=Carboxypeptidase {ECO:0000256|RuleBase:RU361156}; EC=3.4.16.- {ECO:0000256|RuleBase:RU361156};	--	GO:0005623,cell; GO:0009055,electron transfer activity; GO:0015035,protein disulfide oxidoreductase activity; GO:0004185,serine-type carboxypeptidase activity; GO:0045454,cell redox homeostasis; GO:0007165,signal transduction	Glutaredoxin
Cluster-10658.102145	TRUE	TRUE	TRUE	K10781 fatty acyl-ACP thioesterase B [EC:3.1.2.14 3.1.2.21] | (RefSeq) palmitoyl-acyl carrier protein thioesterase, chloroplastic-like (A)	PREDICTED: palmitoyl-acyl carrier protein thioesterase, chloroplastic-like [Daucus carota subsp. sativus]	RecName: Full=Palmitoyl-acyl carrier protein thioesterase, chloroplastic; EC=3.1.2.-; AltName: Full=16:0-acyl-carrier protein thioesterase; Short=16:0-ACP thioesterase; AltName: Full=Acyl-[acyl-carrier-protein] hydrolase; AltName: Full=PATE; Flags: Precursor;	RecName: Full=Acyl-[acyl-carrier-protein] hydrolase {ECO:0000256|RuleBase:RU363096}; EC=3.1.2.- {ECO:0000256|RuleBase:RU363096};	--	GO:0009507,chloroplast; GO:0016790,thiolester hydrolase activity; GO:0006633,fatty acid biosynthetic process	Acyl-ACP thioesterase
Cluster-10658.104405	TRUE	TRUE	TRUE	--	uncharacterized protein LOC110607994 [Manihot esculenta]	--	SubName: Full=Uncharacterized protein {ECO:0000313|EMBL:OAY21589.1};	--	--	--
Cluster-10658.84146	TRUE	TRUE	TRUE	K04421 mitogen-activated protein kinase kinase kinase 3 [EC:2.7.11.25] | (RefSeq) mitogen-activated protein kinase kinase kinase 3-like (A)	PREDICTED: mitogen-activated protein kinase kinase kinase NPK1-like [Daucus carota subsp. sativus]	RecName: Full=Mitogen-activated protein kinase kinase kinase 17 {ECO:0000303|PubMed:25720833}; EC=2.7.11.25 {ECO:0000250|UniProtKB:Q9ZVP5, ECO:0000255|PROSITE-ProRule:PRU00159};	SubName: Full=Uncharacterized protein {ECO:0000313|EMBL:KZM91263.1};	MEKK and related serine/threonine protein kinases	GO:0005737,cytoplasm; GO:0005634,nucleus; GO:0005524,ATP binding; GO:0004709,MAP kinase kinase kinase activity; GO:0004674,protein serine/threonine kinase activity; GO:0004702,NA; GO:0009738,abscisic acid-activated signaling pathway; GO:0032147,activation of protein kinase activity; GO:0007346,regulation of mitotic cell cycle; GO:0009737,response to abscisic acid; GO:0006970,response to osmotic s…	Protein tyrosine kinase
Cluster-10658.90099	TRUE	TRUE	TRUE	--	uncharacterized protein LOC106777188 [Vigna radiata var. radiata]	--	SubName: Full=uncharacterized protein LOC106777188 {ECO:0000313|RefSeq:XP_014520215.1};	--	--	Protein of unknown function (DUF740)
Cluster-10658.129962	TRUE	TRUE	TRUE	K08332 vacuolar protein 8 | (RefSeq) hypothetical protein (A)	PREDICTED: U-box domain-containing protein 28-like [Daucus carota subsp. sativus]	RecName: Full=U-box domain-containing protein 28; EC=2.3.2.27; AltName: Full=Plant U-box protein 28; AltName: Full=RING-type E3 ubiquitin transferase PUB28 {ECO:0000305};	RecName: Full=RING-type E3 ubiquitin transferase {ECO:0000256|SAAS:SAAS00702733}; EC=2.3.2.27 {ECO:0000256|SAAS:SAAS00702733};	--	GO:0004842,ubiquitin-protein transferase activity; GO:0010200,response to chitin	U-box domain
Cluster-10658.98243	TRUE	TRUE	TRUE	K04733 interleukin-1 receptor-associated kinase 4 [EC:2.7.11.1] | (RefSeq) probable receptor-like protein kinase At1g11050 (A)	PREDICTED: probable receptor-like protein kinase At1g11050 [Daucus carota subsp. sativus]	RecName: Full=Probable receptor-like protein kinase At1g11050; EC=2.7.11.1; Flags: Precursor;	SubName: Full=Uncharacterized protein {ECO:0000313|EMBL:KZN10916.1};	Serine/threonine protein kinase	GO:0016021,integral component of membrane; GO:0005886,plasma membrane; GO:0005524,ATP binding; GO:0004674,protein serine/threonine kinase activity	Protein tyrosine kinase
Cluster-10658.102894	TRUE	TRUE	TRUE	K13425 WRKY transcription factor 22 | (RefSeq) probable WRKY transcription factor 27 isoform X1 (A)	WRKY10 [Panax quinquefolius]	RecName: Full=Probable WRKY transcription factor 11; AltName: Full=WRKY DNA-binding protein 11;	SubName: Full=WRKY10 {ECO:0000313|EMBL:AEQ29023.1};	--	GO:0005634,nucleus; GO:0005516,calmodulin binding; GO:0003700,DNA-binding transcription factor activity; GO:0043565,sequence-specific DNA binding; GO:0042742,defense response to bacterium; GO:0010200,response to chitin; GO:0006351,transcription, DNA-templated	WRKY DNA -binding domain
Cluster-10658.95464	TRUE	TRUE	TRUE	K20893 probable galacturonosyltransferase-like 1 [EC:2.4.1.-] | (RefSeq) probable galacturonosyltransferase-like 1 (A)	PREDICTED: probable galacturonosyltransferase-like 9 [Daucus carota subsp. sativus]	RecName: Full=Probable galacturonosyltransferase-like 9; EC=2.4.1.-; AltName: Full=Like glycosyl transferase 8;	RecName: Full=Hexosyltransferase {ECO:0000256|RuleBase:RU362027}; EC=2.4.1.- {ECO:0000256|RuleBase:RU362027};	--	GO:0005794,Golgi apparatus; GO:0000139,Golgi membrane; GO:0016021,integral component of membrane; GO:0047262,polygalacturonate 4-alpha-galacturonosyltransferase activity; GO:0016757,transferase activity, transferring glycosyl groups; GO:0071555,cell wall organization; GO:0045489,pectin biosynthetic process; GO:0000271,polysaccharide biosynthetic process	Glucosyltransferase 24
Cluster-10658.106426	TRUE	TRUE	TRUE	K08332 vacuolar protein 8 | (RefSeq) hypothetical protein (A)	PREDICTED: U-box domain-containing protein 17 [Theobroma cacao]	RecName: Full=U-box domain-containing protein 17; EC=2.3.2.27; AltName: Full=Plant U-box protein 17; AltName: Full=RING-type E3 ubiquitin transferase PUB17 {ECO:0000305};	RecName: Full=RING-type E3 ubiquitin transferase {ECO:0000256|SAAS:SAAS00702733}; EC=2.3.2.27 {ECO:0000256|SAAS:SAAS00702733};	FOG: Armadillo/beta-catenin-like repeats	GO:0005737,cytoplasm; GO:0005634,nucleus; GO:0004842,ubiquitin-protein transferase activity; GO:0009814,defense response, incompatible interaction; GO:0016567,protein ubiquitination	Armadillo-like
Cluster-10658.90392	TRUE	TRUE	TRUE	K13425 WRKY transcription factor 22 | (RefSeq) probable WRKY transcription factor 29 (A)	hypothetical protein CDL12_19530 [Handroanthus impetiginosus]	RecName: Full=WRKY transcription factor 22; AltName: Full=WRKY DNA-binding protein 22;	SubName: Full=Uncharacterized protein {ECO:0000313|EMBL:PIN07897.1};	--	GO:0005634,nucleus; GO:0003700,DNA-binding transcription factor activity; GO:0043565,sequence-specific DNA binding; GO:0006952,defense response; GO:0010150,leaf senescence; GO:0010200,response to chitin; GO:0006351,transcription, DNA-templated	WRKY DNA -binding domain
Cluster-10658.138144	TRUE	TRUE	TRUE	K21989 calcium permeable stress-gated cation channel | (RefSeq) CSC1-like protein RXW8 (A)	PREDICTED: protein SAR DEFICIENT 1-like [Daucus carota subsp. sativus]	RecName: Full=Protein SAR DEFICIENT 1 {ECO:0000303|PubMed:20921422};	SubName: Full=Uncharacterized protein {ECO:0000313|EMBL:KZM89420.1};	--	GO:0005634,nucleus; GO:0003700,DNA-binding transcription factor activity; GO:0043565,sequence-specific DNA binding; GO:0071219,cellular response to molecule of bacterial origin; GO:0042742,defense response to bacterium; GO:0002229,defense response to oomycetes; GO:0009626,plant-type hypersensitive response; GO:1900426,positive regulation of defense response to bacterium; GO:0080142,regulation of …	Calmodulin binding protein-like
Cluster-10658.137168	TRUE	TRUE	TRUE	--	PREDICTED: uncharacterized protein LOC108220128 [Daucus carota subsp. sativus]	--	SubName: Full=Uncharacterized protein {ECO:0000313|EMBL:KZM93523.1};	--	--	--
Cluster-10658.105217	TRUE	TRUE	TRUE	K00512 steroid 17alpha-monooxygenase / 17alpha-hydroxyprogesterone deacetylase [EC:1.14.14.19 1.14.14.32] | (RefSeq) cytochrome P450 71D8-like (A)	cytochrome P450 [Panax notoginseng]	RecName: Full=Cytochrome P450 CYP71D313; EC=1.14.-.-;	SubName: Full=Cytochrome P450 {ECO:0000313|EMBL:AED99878.1};	Cytochrome P450 CYP2 subfamily	GO:0016021,integral component of membrane; GO:0020037,heme binding; GO:0005506,iron ion binding; GO:0004497,monooxygenase activity; GO:0016705,oxidoreductase activity, acting on paired donors, with incorporation or reduction of molecular oxygen	Cytochrome P450
Cluster-10658.108801	TRUE	TRUE	TRUE	K13429 chitin elicitor receptor kinase 1 | (RefSeq) chitin elicitor receptor kinase 1-like isoform X1 (A)	PREDICTED: cytochrome b561 and DOMON domain-containing protein At5g35735-like [Daucus carota subsp. sativus]	RecName: Full=Cytochrome b561 and DOMON domain-containing protein At5g47530; AltName: Full=Protein b561A.tha10; Flags: Precursor;	SubName: Full=Uncharacterized protein {ECO:0000313|EMBL:KZM95986.1};	Predicted membrane protein, contains DoH and Cytochrome b-561/ferric reductase transmembrane domains	GO:0016021,integral component of membrane; GO:0046872,metal ion binding; GO:0055114,oxidation-reduction process	Protein of unknown function (DUF568)
Cluster-10658.83646	TRUE	TRUE	TRUE	K03327 multidrug resistance protein, MATE family | (RefSeq) protein DETOXIFICATION 14-like (A)	PREDICTED: uncharacterized protein LOC108194436 [Daucus carota subsp. sativus]	--	SubName: Full=Uncharacterized protein {ECO:0000313|EMBL:CCB50854.1};	--	--	Domain of unknown function (DUF4228)
Cluster-10658.77110	TRUE	TRUE	TRUE	K17506 protein phosphatase 1L [EC:3.1.3.16] | (RefSeq) probable protein phosphatase 2C 25 (A)	PREDICTED: probable protein phosphatase 2C 25 [Juglans regia]	RecName: Full=Probable protein phosphatase 2C 25; Short=AtPP2C25; EC=3.1.3.16; AltName: Full=Protein phosphatase AP2C1;	SubName: Full=probable protein phosphatase 2C 25 {ECO:0000313|RefSeq:XP_018835605.1};	Serine/threonine protein phosphatase	GO:0005634,nucleus; GO:0009536,plastid; GO:0046872,metal ion binding; GO:0004722,protein serine/threonine phosphatase activity; GO:0009738,abscisic acid-activated signaling pathway; GO:0050832,defense response to fungus; GO:0009620,response to fungus; GO:0009611,response to wounding	Stage II sporulation protein E (SpoIIE)
Cluster-10658.111620	TRUE	TRUE	TRUE	K04733 interleukin-1 receptor-associated kinase 4 [EC:2.7.11.1] | (RefSeq) probable receptor-like protein kinase At1g30570 (A)	PREDICTED: F-box/kelch-repeat protein SKIP11-like [Daucus carota subsp. sativus]	RecName: Full=F-box/kelch-repeat protein SKIP11; AltName: Full=SKP1-interacting partner 11;	SubName: Full=Uncharacterized protein {ECO:0000313|EMBL:KZM83462.1};	FOG: Kelch repeat	GO:0005737,cytoplasm; GO:0005634,nucleus; GO:0019005,SCF ubiquitin ligase complex; GO:0031625,ubiquitin protein ligase binding; GO:0043161,proteasome-mediated ubiquitin-dependent protein catabolic process; GO:0042787,NA; GO:0030162,regulation of proteolysis	Galactose oxidase, central domain
Cluster-10658.95857	TRUE	TRUE	TRUE	K01537 Ca2+-transporting ATPase [EC:3.6.3.8] | (RefSeq) putative calcium-transporting ATPase 13, plasma membrane-type (A)	PREDICTED: putative calcium-transporting ATPase 13, plasma membrane-type [Daucus carota subsp. sativus]	RecName: Full=Calcium-transporting ATPase 12, plasma membrane-type; EC=3.6.3.8; AltName: Full=Ca(2+)-ATPase isoform 12;	RecName: Full=Calcium-transporting ATPase {ECO:0000256|RuleBase:RU361146}; EC=3.6.3.8 {ECO:0000256|RuleBase:RU361146};	Calcium transporting ATPase	GO:0005887,integral component of plasma membrane; GO:0043231,intracellular membrane-bounded organelle; GO:0005524,ATP binding; GO:0005388,calcium-transporting ATPase activity; GO:0005516,calmodulin binding; GO:0046872,metal ion binding	haloacid dehalogenase-like hydrolase
Cluster-10658.101481	TRUE	TRUE	TRUE	K00423 L-ascorbate oxidase [EC:1.10.3.3] | (RefSeq) L-ascorbate oxidase (A)	PREDICTED: L-ascorbate oxidase [Solanum pennellii]	RecName: Full=L-ascorbate oxidase; Short=ASO; Short=Ascorbase; EC=1.10.3.3; Flags: Precursor;	SubName: Full=Uncharacterized protein {ECO:0000313|EnsemblPlants:Solyc04g054690.2.1};	Multicopper oxidases	GO:0005576,extracellular region; GO:0005507,copper ion binding; GO:0008447,L-ascorbate oxidase activity	Multicopper oxidase
Cluster-10658.113911	TRUE	TRUE	TRUE	K09753 cinnamoyl-CoA reductase [EC:1.2.1.44] | (RefSeq) cinnamoyl-CoA reductase 1-like (A)	PREDICTED: cinnamoyl-CoA reductase 2-like [Daucus carota subsp. sativus]	RecName: Full=Cinnamoyl-CoA reductase 1 {ECO:0000305}; Short=OsCCR1 {ECO:0000303|PubMed:16380417}; EC=1.2.1.44 {ECO:0000269|PubMed:16380417};	SubName: Full=Uncharacterized protein {ECO:0000313|EMBL:KZM98694.1};	Flavonol reductase/cinnamoyl-CoA reductase	GO:0005737,cytoplasm; GO:0016621,cinnamoyl-CoA reductase activity; GO:0050662,coenzyme binding; GO:0006952,defense response; GO:0009809,lignin biosynthetic process	KR domain
Cluster-10658.97312	TRUE	TRUE	TRUE	--	uncharacterized protein LOC111391744 [Olea europaea var. sylvestris]	RecName: Full=Basic secretory protease {ECO:0000303|PubMed:22773449}; EC=3.4.24.- {ECO:0000269|PubMed:22773449}; AltName: Full=Boswellia basic secretory protease {ECO:0000303|PubMed:22773449}; Short=BBSP {ECO:0000303|PubMed:22773449}; Flags: Fragments;	SubName: Full=Basic secretory protease {ECO:0000313|EMBL:PHT48560.1};	--	GO:0046872,metal ion binding; GO:0008237,metallopeptidase activity	SprT-like family
Cluster-10658.85288	TRUE	TRUE	TRUE	K21914 BTB/POZ domain-containing protein KCTD2/5/17 | (RefSeq) BTB/POZ domain-containing protein At2g24240-like (A)	PREDICTED: BTB/POZ domain-containing protein At2g24240-like [Daucus carota subsp. sativus]	RecName: Full=BTB/POZ domain-containing protein At2g24240;	SubName: Full=Uncharacterized protein {ECO:0000313|EMBL:KZM96146.1};	SETA binding protein SB1 and related proteins, contain BTB/POZ domain	GO:0051260,protein homooligomerization; GO:0016567,protein ubiquitination	BTB/POZ domain
Cluster-10658.78136	TRUE	TRUE	TRUE	K04733 interleukin-1 receptor-associated kinase 4 [EC:2.7.11.1] | (RefSeq) uncharacterized protein LOC110908553 (A)	PREDICTED: IQ domain-containing protein IQM1-like [Daucus carota subsp. sativus]	RecName: Full=IQ domain-containing protein IQM1 {ECO:0000305}; AltName: Full=IQ motif-containing protein 1 {ECO:0000303|Ref.6};	SubName: Full=Uncharacterized protein {ECO:0000313|EMBL:KZM84185.1};	--	GO:0005737,cytoplasm; GO:0005634,nucleus; GO:0005516,calmodulin binding; GO:0010119,regulation of stomatal movement	--
Cluster-10658.69131	TRUE	TRUE	TRUE	K22395 cinnamyl-alcohol dehydrogenase [EC:1.1.1.195] | (RefSeq) flavin-dependent oxidoreductase FOX2-like (A)	PREDICTED: flavin-dependent oxidoreductase FOX2-like [Daucus carota subsp. sativus]	RecName: Full=Berberine bridge enzyme-like 13 {ECO:0000303|PubMed:26037923}; Short=AtBBE-like 13 {ECO:0000303|PubMed:26037923}; EC=1.1.1.194 {ECO:0000269|PubMed:26037923}; EC=1.1.1.195 {ECO:0000269|PubMed:26037923}; Flags: Precursor;	SubName: Full=Uncharacterized protein {ECO:0000313|EMBL:KZN05772.1};	--	GO:0005618,cell wall; GO:0005576,extracellular region; GO:0045551,cinnamyl-alcohol dehydrogenase activity; GO:0050268,coniferyl-alcohol dehydrogenase activity; GO:0050660,flavin adenine dinucleotide binding; GO:0052747,sinapyl alcohol dehydrogenase activity	Berberine and berberine like
Cluster-10658.131764	TRUE	TRUE	TRUE	K12847 U4/U6.U5 tri-snRNP-associated protein 2 | (RefSeq) U4/U6.U5 tri-snRNP-associated protein 2-like (A)	Peptidase C19, ubiquitin carboxyl-terminal hydrolase 2 [Corchorus olitorius]	RecName: Full=Ubiquitin carboxyl-terminal hydrolase 8; EC=3.4.19.12; AltName: Full=Deubiquitinating enzyme 8; Short=AtUBP8; AltName: Full=Ubiquitin thioesterase 8; AltName: Full=Ubiquitin-specific-processing protease 8;	SubName: Full=Peptidase C19, ubiquitin carboxyl-terminal hydrolase 2 {ECO:0000313|EMBL:OMO97382.1};	Spindle pole body protein - Sad1p	GO:0036459,thiol-dependent ubiquitinyl hydrolase activity; GO:0016579,protein deubiquitination; GO:0006511,ubiquitin-dependent protein catabolic process	Ubiquitin carboxyl-terminal hydrolase
Cluster-10658.152880	TRUE	TRUE	TRUE	K15333 tRNA guanosine-2'-O-methyltransferase [EC:2.1.1.34] | (RefSeq) uncharacterized LOC105043884 (A)	PREDICTED: cucumisin isoform X2 [Vitis vinifera]	RecName: Full=Cucumisin; EC=3.4.21.25; AltName: Allergen=Cuc m 1; Flags: Precursor;	SubName: Full=Uncharacterized protein {ECO:0000313|EMBL:CBI31603.3};	--	GO:0005576,extracellular region; GO:0004252,serine-type endopeptidase activity	Peptidase inhibitor I9
Cluster-10658.95255	TRUE	TRUE	TRUE	--	PREDICTED: uncharacterized protein At5g05190-like [Daucus carota subsp. sativus]	RecName: Full=Protein ENHANCED DISEASE RESISTANCE 4 {ECO:0000303|PubMed:25747881};	SubName: Full=Uncharacterized protein {ECO:0000313|EMBL:KZM92480.1};	--	GO:0005768,endosome; GO:0005886,plasma membrane; GO:0006952,defense response; GO:0006897,endocytosis; GO:1900150,regulation of defense response to fungus; GO:0030100,regulation of endocytosis; GO:0009620,response to fungus; GO:0009863,salicylic acid mediated signaling pathway	Probable zinc-ribbon domain
Cluster-10658.101391	TRUE	TRUE	TRUE	K07761 metalloendoproteinase 5-MMP [EC:3.4.24.-] | (RefSeq) metalloendoproteinase 5-MMP-like (A)	hypothetical protein DCAR_026562 [Daucus carota subsp. sativus]	RecName: Full=Metalloendoproteinase 5-MMP {ECO:0000303|PubMed:10574937}; Short=At5-MMP {ECO:0000303|PubMed:10574937}; EC=3.4.24.- {ECO:0000305}; Flags: Precursor;	SubName: Full=Uncharacterized protein {ECO:0000313|EMBL:KZM86016.1};	Gelatinase A and related matrix metalloproteases	GO:0031225,anchored component of membrane; GO:0031012,extracellular matrix; GO:0005886,plasma membrane; GO:0004222,metalloendopeptidase activity; GO:0008270,zinc ion binding	Metallo-peptidase family M12B Reprolysin-like
Cluster-10658.101671	TRUE	TRUE	TRUE	--	PREDICTED: uncharacterized protein LOC108207665 [Daucus carota subsp. sativus]	--	SubName: Full=Uncharacterized protein {ECO:0000313|EMBL:KZN06250.1};	--	--	Protein of unknown function (DUF1645)
Cluster-10658.116873	TRUE	TRUE	TRUE	--	uncharacterized protein LOC110819284 [Carica papaya]	--	SubName: Full=Alpha/beta hydrolase related protein {ECO:0000313|EMBL:EOY17813.1};	Predicted hydrolase/acyltransferase (alpha/beta hydrolase superfamily)	GO:0016021,integral component of membrane; GO:0016787,hydrolase activity	Cholesterol-capturing domain
Cluster-10658.116461	TRUE	TRUE	TRUE	K17768 mitochondrial import receptor subunit TOM70 | (RefSeq) protein PHOX1-like (A)	PREDICTED: uncharacterized protein LOC108214952 [Daucus carota subsp. sativus]	RecName: Full=Protein PHOX1 {ECO:0000303|PubMed:20856808}; AltName: Full=Protein MADB1 {ECO:0000303|PubMed:28096376}; AltName: Full=Putative myosin adapter B1 {ECO:0000303|PubMed:28096376};	SubName: Full=Uncharacterized protein {ECO:0000313|EMBL:KZN00590.1};	Myosin assembly protein/sexual cycle protein and related proteins	GO:0030659,cytoplasmic vesicle membrane	Tetratricopeptide repeat
Cluster-10658.90624	TRUE	TRUE	TRUE	--	putative succinyl-CoA synthetase-like protein [Helianthus annuus]	--	SubName: Full=Putative succinyl-CoA synthetase-like protein {ECO:0000313|EMBL:OTG35757.1};	--	--	--
Cluster-10658.125373	TRUE	TRUE	TRUE	--	PREDICTED: trihelix transcription factor GT-3b-like [Daucus carota subsp. sativus]	RecName: Full=Trihelix transcription factor GT-3a; AltName: Full=Trihelix DNA-binding protein GT-3a;	SubName: Full=Uncharacterized protein {ECO:0000313|EMBL:KZM83720.1};	Transcription factor GT-2 and related proteins, contains trihelix DNA-binding/SANT domain	GO:0005634,nucleus; GO:0003700,DNA-binding transcription factor activity; GO:0042802,identical protein binding; GO:0000981,DNA-binding transcription factor activity, RNA polymerase II-specific; GO:0043565,sequence-specific DNA binding; GO:0006355,regulation of transcription, DNA-templated; GO:0006351,transcription, DNA-templated	Myb-like DNA-binding domain
Cluster-10658.90098	TRUE	TRUE	TRUE	--	--	--	--	--	--	--
Cluster-10658.72277	TRUE	TRUE	TRUE	--	PREDICTED: uncharacterized protein LOC100246308 [Vitis vinifera]	RecName: Full=Precursor of CEP14 {ECO:0000303|PubMed:24179096}; Short=PCEP14 {ECO:0000303|PubMed:24179096}; Contains: RecName: Full=C-terminally encoded peptide 14 {ECO:0000303|PubMed:24179096}; Short=CEP14 {ECO:0000303|PubMed:24179096}; Flags: Precursor;	SubName: Full=Uncharacterized protein {ECO:0000313|EMBL:CAN69942.1};	--	GO:0048046,apoplast; GO:0005179,hormone activity; GO:0007275,multicellular organism development; GO:1902025,nitrate import; GO:2000280,regulation of root development; GO:0010037,response to carbon dioxide; GO:0006970,response to osmotic stress	--
Cluster-10658.112747	TRUE	TRUE	TRUE	K14165 atypical dual specificity phosphatase [EC:3.1.3.16 3.1.3.48] | (RefSeq) putative dual specificity protein phosphatase DSP8 (A)	PREDICTED: putative dual specificity protein phosphatase DSP8 [Daucus carota subsp. sativus]	RecName: Full=Putative dual specificity protein phosphatase DSP8; EC=3.1.3.16; EC=3.1.3.48;	SubName: Full=Uncharacterized protein {ECO:0000313|EMBL:KZM83934.1};	Dual specificity phosphatase	GO:0004439,phosphatidylinositol-4,5-bisphosphate 5-phosphatase activity; GO:0004725,protein tyrosine phosphatase activity; GO:0008138,protein tyrosine/serine/threonine phosphatase activity	Inositol hexakisphosphate
Cluster-10658.128052	TRUE	TRUE	TRUE	K15015 solute carrier family 32 (vesicular inhibitory amino acid transporter) | (RefSeq) lysine histidine transporter-like 2 (A)	lysine histidine transporter [Panax ginseng]	RecName: Full=Lysine histidine transporter 1;	SubName: Full=Lysine histidine transporter {ECO:0000313|EMBL:AGN03890.1};	Amino acid transporters	GO:0016021,integral component of membrane; GO:0005886,plasma membrane; GO:0015171,amino acid transmembrane transporter activity; GO:0015293,symporter activity; GO:0043090,amino acid import; GO:0080167,response to karrikin	Tryptophan/tyrosine permease family
Cluster-10658.68423	TRUE	TRUE	TRUE	K08511 vesicle-associated membrane protein 72 | (RefSeq) vesicle-associated membrane protein 724 (A)	PREDICTED: vesicle-associated membrane protein 724 [Daucus carota subsp. sativus]	RecName: Full=Vesicle-associated membrane protein 724 {ECO:0000303|PubMed:11115874}; Short=AtVAMP724 {ECO:0000303|PubMed:11115874}; AltName: Full=SYBL1-like protein {ECO:0000303|PubMed:9461215};	SubName: Full=Uncharacterized protein {ECO:0000313|EMBL:KZM82963.1};	Synaptobrevin/VAMP-like protein	GO:0031901,early endosome membrane; GO:0016021,integral component of membrane; GO:0005886,plasma membrane; GO:0031201,SNARE complex; GO:0005484,SNAP receptor activity; GO:0000149,SNARE binding; GO:0006887,exocytosis; GO:0015031,protein transport; GO:0006906,vesicle fusion	Secretion system effector C (SseC) like family
Cluster-10658.118290	TRUE	TRUE	TRUE	--	PREDICTED: transmembrane protein 53 [Daucus carota subsp. sativus]	--	SubName: Full=Uncharacterized protein {ECO:0000313|EMBL:KZN09950.1};	Uncharacterized conserved protein	--	Eukaryotic protein of unknown function (DUF829)
Cluster-10658.110110	TRUE	TRUE	TRUE	--	PREDICTED: cell wall / vacuolar inhibitor of fructosidase 1-like [Daucus carota subsp. sativus]	RecName: Full=Cell wall / vacuolar inhibitor of fructosidase 1; Short=AtC/VIF1; Flags: Precursor;	SubName: Full=Uncharacterized protein {ECO:0000313|EMBL:KZM86224.1};	--	GO:0005618,cell wall; GO:0005773,vacuole; GO:0004857,enzyme inhibitor activity; GO:0043086,negative regulation of catalytic activity	Plant invertase/pectin methylesterase inhibitor
Cluster-10658.107869	TRUE	TRUE	TRUE	K13699 abhydrolase domain-containing protein 5 [EC:2.3.1.51] | (RefSeq) probable 1-acylglycerol-3-phosphate O-acyltransferase (A)	PREDICTED: probable 1-acylglycerol-3-phosphate O-acyltransferase [Daucus carota subsp. sativus]	RecName: Full=1-acylglycerol-3-phosphate O-acyltransferase; EC=2.3.1.51; AltName: Full=Lipid droplet-binding protein CGI-58 homolog;	SubName: Full=Uncharacterized protein {ECO:0000313|EMBL:KZM98787.1};	Predicted hydrolase/acyltransferase (alpha/beta hydrolase superfamily)	GO:0005737,cytoplasm; GO:0003841,1-acylglycerol-3-phosphate O-acyltransferase activity; GO:0016298,lipase activity; GO:0042171,lysophosphatidic acid acyltransferase activity; GO:0004623,phospholipase A2 activity; GO:0055089,fatty acid homeostasis; GO:0055088,lipid homeostasis; GO:0008654,phospholipid biosynthetic process; GO:0055091,phospholipid homeostasis; GO:0070328,triglyceride homeostasis	PGAP1-like protein
Cluster-10658.106279	TRUE	TRUE	TRUE	K00799 glutathione S-transferase [EC:2.5.1.18] | (RefSeq) probable glutathione S-transferase (A)	PREDICTED: probable glutathione S-transferase [Daucus carota subsp. sativus]	RecName: Full=Probable glutathione S-transferase; EC=2.5.1.18; AltName: Full=Auxin-induced protein PGNT1/PCNT110;	SubName: Full=Uncharacterized protein {ECO:0000313|EMBL:KZN03389.1};	Glutathione S-transferase	GO:0004364,glutathione transferase activity; GO:0009734,auxin-activated signaling pathway	Glutathione S-transferase, C-terminal domain
Cluster-10658.104483	TRUE	TRUE	TRUE	K23480 zinc finger protein 362/384 | (RefSeq) zinc finger protein ZAT5 (A)	PREDICTED: zinc finger protein ZAT12-like [Daucus carota subsp. sativus]	RecName: Full=Zinc finger protein ZAT11;	SubName: Full=Uncharacterized protein {ECO:0000313|EMBL:KZM97032.1};	FOG: Zn-finger	GO:0005634,nucleus; GO:0003700,DNA-binding transcription factor activity; GO:0046872,metal ion binding; GO:0003676,nucleic acid binding; GO:0071289,cellular response to nickel ion; GO:2000280,regulation of root development; GO:0006355,regulation of transcription, DNA-templated; GO:0010200,response to chitin; GO:0006351,transcription, DNA-templated	C2H2-type zinc ribbon
Cluster-10658.99995	TRUE	TRUE	TRUE	--	hypothetical protein CFP56_72907 [Quercus suber]	RecName: Full=Hydrophobic protein RCI2B; AltName: Full=Low temperature and salt-responsive protein LTI6B;	SubName: Full=Uncharacterized protein {ECO:0000313|EnsemblPlants:GSMUA_Achr8P15090_001};	--	GO:0016021,integral component of membrane; GO:0009737,response to abscisic acid; GO:0009409,response to cold; GO:0009651,response to salt stress; GO:0009414,response to water deprivation	--
Cluster-10658.47824	TRUE	TRUE	TRUE	K09285 AP2-like factor, ANT lineage | (RefSeq) AP2-like ethylene-responsive transcription factor At1g16060 (A)	hypothetical protein AQUCO_04800034v1 [Aquilegia coerulea]	RecName: Full=AP2-like ethylene-responsive transcription factor At1g16060;	SubName: Full=Uncharacterized protein {ECO:0000313|EMBL:PIA31854.1};	--	GO:0005634,nucleus; GO:0003677,DNA binding; GO:0003700,DNA-binding transcription factor activity; GO:0000981,DNA-binding transcription factor activity, RNA polymerase II-specific; GO:0009873,ethylene-activated signaling pathway; GO:0007275,multicellular organism development; GO:0010187,negative regulation of seed germination; GO:1901959,positive regulation of cutin biosynthetic process; GO:004572…	AP2 domain
Cluster-10658.44226	TRUE	TRUE	TRUE	--	PREDICTED: putative UPF0481 protein At3g02645 [Daucus carota subsp. sativus]	RecName: Full=Putative UPF0481 protein At3g02645;	SubName: Full=Uncharacterized protein {ECO:0000313|EMBL:KZM94754.1};	--	GO:0016021,integral component of membrane	Plant protein of unknown function
Cluster-10658.123211	TRUE	TRUE	TRUE	K03676 glutaredoxin 3 | (RefSeq) glutaredoxin-C3 isoform X2 (A)	PREDICTED: uncharacterized protein LOC108199883 [Daucus carota subsp. sativus]	--	SubName: Full=Uncharacterized protein {ECO:0000313|EMBL:KZM85718.1};	--	GO:0005622,intracellular; GO:0009055,electron transfer activity; GO:0015035,protein disulfide oxidoreductase activity; GO:0045454,cell redox homeostasis; GO:0035556,intracellular signal transduction	Glutaredoxin
Cluster-10658.101843	TRUE	TRUE	TRUE	K20556 cytochrome P450 family 76 subfamily C | (RefSeq) geraniol 8-hydroxylase-like (A)	PREDICTED: geraniol 8-hydroxylase-like [Daucus carota subsp. sativus]	RecName: Full=Geraniol 8-hydroxylase; EC=1.14.13.152; AltName: Full=Cytochrome P450 76B10; AltName: Full=Geraniol 10-hydroxylase; Short=SmG10H;	SubName: Full=Uncharacterized protein {ECO:0000313|EMBL:KZN05944.1};	Cytochrome P450 CYP2 subfamily	GO:0005789,endoplasmic reticulum membrane; GO:0016021,integral component of membrane; GO:0102811,geraniol 10-hydroxylase activity; GO:0020037,heme binding; GO:0005506,iron ion binding; GO:0016709,oxidoreductase activity, acting on paired donors, with incorporation or reduction of molecular oxygen, NAD(P)H as one donor, and incorporation of one atom of oxygen; GO:0016099,monoterpenoid biosynthetic…	Cytochrome P450
Cluster-10658.97872	TRUE	TRUE	TRUE	K00422 polyphenol oxidase [EC:1.10.3.1] | (RefSeq) polyphenol oxidase, chloroplastic-like (A)	PREDICTED: polyphenol oxidase, chloroplastic-like [Daucus carota subsp. sativus]	RecName: Full=Polyphenol oxidase, chloroplastic; Short=PPO; EC=1.10.3.1; AltName: Full=Catechol oxidase; Flags: Precursor;	SubName: Full=Uncharacterized protein {ECO:0000313|EMBL:KZN07214.1};	--	GO:0009543,chloroplast thylakoid lumen; GO:0004097,catechol oxidase activity; GO:0046872,metal ion binding; GO:0046148,pigment biosynthetic process	Polyphenol oxidase middle domain
Cluster-10658.90884	TRUE	TRUE	TRUE	K01087 trehalose 6-phosphate phosphatase [EC:3.1.3.12] | (RefSeq) trehalose-phosphate phosphatase A-like (A)	PREDICTED: trehalose-phosphate phosphatase A-like [Daucus carota subsp. sativus]	RecName: Full=Trehalose-phosphate phosphatase A; Short=AtTPPA; EC=3.1.3.12; AltName: Full=Trehalose 6-phosphate phosphatase;	RecName: Full=Trehalose 6-phosphate phosphatase {ECO:0000256|RuleBase:RU361117}; EC=3.1.3.12 {ECO:0000256|RuleBase:RU361117};	Trehalose-6-phosphate synthase component TPS1 and related subunits	GO:0004805,trehalose-phosphatase activity; GO:0005992,trehalose biosynthetic process	--
Cluster-10658.97702	TRUE	TRUE	TRUE	--	PREDICTED: uncharacterized protein LOC108204321 [Daucus carota subsp. sativus]	--	SubName: Full=uncharacterized protein LOC107942076 isoform X1 {ECO:0000313|RefSeq:XP_016731209.1};	--	GO:0016021,integral component of membrane	Domain of unknown function (DUF4408)
Cluster-10658.92719	TRUE	TRUE	TRUE	K10256 omega-6 fatty acid desaturase / acyl-lipid omega-6 desaturase (Delta-12 desaturase) [EC:1.14.19.6 1.14.19.22] | (RefSeq) delta(12)-fatty-acid desaturase FAD2-like (A)	PREDICTED: delta(12)-fatty-acid desaturase FAD2-like [Daucus carota subsp. sativus]	RecName: Full=Delta(12)-fatty-acid desaturase {ECO:0000303|PubMed:7907506}; EC=1.14.19.22 {ECO:0000269|PubMed:1730697}; EC=1.14.19.6 {ECO:0000269|PubMed:8685264}; AltName: Full=Omega-6 fatty acid desaturase, endoplasmic reticulum {ECO:0000303|PubMed:7907506};	SubName: Full=Uncharacterized protein {ECO:0000313|EMBL:KZM93765.1};	--	GO:0005789,endoplasmic reticulum membrane; GO:0016021,integral component of membrane; GO:0031090,organelle membrane; GO:0102985,Delta12-fatty-acid desaturase activity; GO:0045485,omega-6 fatty acid desaturase activity; GO:0006636,unsaturated fatty acid biosynthetic process	Fatty acid desaturase
Cluster-10658.123205	TRUE	TRUE	TRUE	K02183 calmodulin | (RefSeq) probable calcium-binding protein CML45 (A)	EF-hand domain [Macleaya cordata]	RecName: Full=Probable calcium-binding protein CML45; AltName: Full=Calmodulin-like protein 45;	SubName: Full=EF-hand domain {ECO:0000313|EMBL:OVA09828.1};	Calmodulin and related proteins (EF-Hand superfamily)	GO:0005509,calcium ion binding	Secreted protein acidic and rich in cysteine Ca binding region
Cluster-10658.144723	TRUE	TRUE	TRUE	K17506 protein phosphatase 1L [EC:3.1.3.16] | (RefSeq) probable protein phosphatase 2C 25 (A)	PREDICTED: probable protein phosphatase 2C 25 [Daucus carota subsp. sativus]	--	SubName: Full=Uncharacterized protein {ECO:0000313|EMBL:KZN06526.1};	--	GO:0046872,metal ion binding; GO:0004722,protein serine/threonine phosphatase activity	--
Cluster-10658.75884	TRUE	TRUE	TRUE	--	PREDICTED: uncharacterized protein At1g76070-like [Daucus carota subsp. sativus]	RecName: Full=Uncharacterized protein At1g76070;	RecName: Full=DNA-directed RNA polymerase subunit {ECO:0000256|RuleBase:RU004279}; EC=2.7.7.6 {ECO:0000256|RuleBase:RU004279};	--	GO:0005886,plasma membrane	--
Cluster-10658.31816	TRUE	TRUE	TRUE	K12486 stromal membrane-associated protein | (RefSeq) probable ADP-ribosylation factor GTPase-activating protein AGD5 isoform X1 (A)	PREDICTED: probable ADP-ribosylation factor GTPase-activating protein AGD5 isoform X1 [Daucus carota subsp. sativus]	RecName: Full=Probable ADP-ribosylation factor GTPase-activating protein AGD5; Short=ARF GAP AGD5; AltName: Full=Protein ARF-GAP DOMAIN 5; Short=AtAGD5; AltName: Full=Protein ZIGA3;	SubName: Full=Uncharacterized protein {ECO:0000313|EMBL:KZM84454.1};	Predicted GTPase-activating protein	GO:0005829,cytosol; GO:0005768,endosome; GO:0005802,trans-Golgi network; GO:0005096,GTPase activator activity; GO:0046872,metal ion binding; GO:0090630,activation of GTPase activity; GO:0010227,floral organ abscission	Putative GTPase activating protein for Arf
Cluster-10658.105371	TRUE	TRUE	TRUE	--	RecName: Full=Pathogenesis-related protein 2 CAA41541.1 pathogenesis-related protein 2 [Petroselinum crispum]	RecName: Full=Pathogenesis-related protein 2;	SubName: Full=Major allergen isoform Dau c 1.0201 {ECO:0000313|EMBL:AAL76932.1};	--	GO:0006952,defense response; GO:0009607,response to biotic stimulus	Pathogenesis-related protein Bet v I family
Cluster-10658.109540	TRUE	TRUE	TRUE	K04733 interleukin-1 receptor-associated kinase 4 [EC:2.7.11.1] | (RefSeq) probable leucine-rich repeat receptor-like protein kinase At5g49770 (A)	hypothetical protein DCAR_003264 [Daucus carota subsp. sativus]	RecName: Full=Probable leucine-rich repeat receptor-like protein kinase At5g49770; EC=2.7.11.1; Flags: Precursor;	SubName: Full=Uncharacterized protein {ECO:0000313|EMBL:KZN10608.1};	--	GO:0016021,integral component of membrane; GO:0005524,ATP binding; GO:0004674,protein serine/threonine kinase activity	Leucine rich repeat
Cluster-10658.101586	TRUE	TRUE	TRUE	--	PREDICTED: uncharacterized protein At5g23160-like isoform X1 [Daucus carota subsp. sativus]	RecName: Full=Uncharacterized protein At5g23160;	SubName: Full=Uncharacterized protein {ECO:0000313|EMBL:KZM85682.1};	--	GO:0016021,integral component of membrane	--
Cluster-10658.62618	TRUE	TRUE	TRUE	--	hypothetical protein CDL12_18167 [Handroanthus impetiginosus]	--	SubName: Full=Uncharacterized protein {ECO:0000313|EMBL:PIN09251.1};	--	--	--
Cluster-10658.67445	TRUE	TRUE	TRUE	K18693 diacylglycerol diphosphate phosphatase / phosphatidate phosphatase [EC:3.1.3.81 3.1.3.4] | (RefSeq) lipid phosphate phosphatase 1-like isoform X1 (A)	PREDICTED: lipid phosphate phosphatase 2-like isoform X2 [Daucus carota subsp. sativus]	RecName: Full=Lipid phosphate phosphatase 1; Short=AtLPP1; EC=3.1.3.-; AltName: Full=Phosphatidic acid phosphatase 1; Short=AtPAP1; AltName: Full=Prenyl diphosphate phosphatase;	SubName: Full=Lipid phosphate phosphatase and related enzymes of the PAP2 family {ECO:0000313|EMBL:PIN23709.1}; EC=3.1.3.4 {ECO:0000313|EMBL:PIN23709.1};	Lipid phosphate phosphatase and related enzymes of the PAP2 family	GO:0005887,integral component of plasma membrane; GO:0005886,plasma membrane; GO:0008195,phosphatidate phosphatase activity; GO:0009626,plant-type hypersensitive response; GO:0010224,response to UV-B	PAP2 superfamily
Cluster-10658.98961	TRUE	TRUE	TRUE	K10268 F-box and leucine-rich repeat protein 2/20 | (RefSeq) F-box protein At1g47056-like (A)	PREDICTED: F-box protein SKIP2 [Daucus carota subsp. sativus]	RecName: Full=F-box protein At1g47056;	SubName: Full=Uncharacterized protein {ECO:0000313|EMBL:KZM88678.1};	Leucine rich repeat proteins, some proteins contain F-box	GO:0004842,ubiquitin-protein transferase activity	F-box
Cluster-10658.83447	TRUE	TRUE	TRUE	--	PREDICTED: uncharacterized protein LOC108201460 [Daucus carota subsp. sativus]	--	SubName: Full=Uncharacterized protein {ECO:0000313|EMBL:KZM82597.1};	--	--	--
Cluster-10658.114306	TRUE	TRUE	TRUE	--	PREDICTED: phosphate transporter PHO1 homolog 3-like [Daucus carota subsp. sativus]	RecName: Full=Phosphate transporter PHO1 homolog 3; AltName: Full=Protein PHO1 homolog 3; Short=AtPHO1;H3;	SubName: Full=Putative small molecule transporter {ECO:0000313|EMBL:PIN13290.1};	Predicted small molecule transporter	GO:0005794,Golgi apparatus; GO:0016021,integral component of membrane; GO:0005886,plasma membrane; GO:0005802,trans-Golgi network; GO:0055062,phosphate ion homeostasis; GO:0006817,phosphate ion transport; GO:0055069,zinc ion homeostasis	EXS family
Cluster-10658.85186	TRUE	TRUE	TRUE	K17618 ubiquitin-like domain-containing CTD phosphatase 1 [EC:3.1.3.16] | (RefSeq) NLI interacting factor-like phosphatase (A)	PREDICTED: uncharacterized protein LOC108195136 [Daucus carota subsp. sativus]	--	SubName: Full=Uncharacterized protein {ECO:0000313|EMBL:KZM88365.1};	--	--	NLI interacting factor-like phosphatase
Cluster-10658.73690	TRUE	TRUE	TRUE	K08914 light-harvesting complex II chlorophyll a/b binding protein 3 | (RefSeq) chlorophyll a-b binding protein 13, chloroplastic (A)	chlorophyll a-b binding protein 13, chloroplastic [Vigna radiata var. radiata]	RecName: Full=Chlorophyll a-b binding protein 13, chloroplastic; AltName: Full=LHCII type III CAB-13; Flags: Precursor;	RecName: Full=Chlorophyll a-b binding protein, chloroplastic {ECO:0000256|RuleBase:RU363080};	--	GO:0009941,chloroplast envelope; GO:0009535,chloroplast thylakoid membrane; GO:0016021,integral component of membrane; GO:0009522,photosystem I; GO:0009523,photosystem II; GO:0010287,plastoglobule; GO:0016168,chlorophyll binding; GO:0046872,metal ion binding; GO:0031409,pigment binding; GO:0009768,photosynthesis, light harvesting in photosystem I; GO:0018298,protein-chromophore linkage; GO:000941…	Chlorophyll A-B binding protein
Cluster-10658.75261	TRUE	TRUE	TRUE	K07893 Ras-related protein Rab-6A | (Kazusa) Lj6g3v0528530.1; - (A)	GTPase Rab6/YPT6/Ryh1, small G protein superfamily [Handroanthus impetiginosus]	RecName: Full=Ras-related protein RABH1e; Short=AtRABH1e;	SubName: Full=GTPase Rab6/YPT6/Ryh1, small G protein superfamily {ECO:0000313|EMBL:PIN18927.1};	GTPase Rab6/YPT6/Ryh1, small G protein superfamily	GO:0005829,cytosol; GO:0005794,Golgi apparatus; GO:0000139,Golgi membrane; GO:0005525,GTP binding; GO:0003924,GTPase activity; GO:0006891,intra-Golgi vesicle-mediated transport; GO:0015031,protein transport; GO:0042147,retrograde transport, endosome to Golgi; GO:0006890,retrograde vesicle-mediated transport, Golgi to ER	Ferrous iron transport protein B
Cluster-10658.184483	TRUE	TRUE	TRUE	K12639 cytochrome P450 family 724 subfamily B polypeptide 1 [EC:1.14.13.-] | (RefSeq) cytochrome P450 724B1-like (A)	PREDICTED: protein trichome birefringence-like 19 [Daucus carota subsp. sativus]	RecName: Full=Protein trichome birefringence-like 19;	SubName: Full=Uncharacterized protein {ECO:0000313|EMBL:KZN02224.1};	--	GO:0005794,Golgi apparatus; GO:0016021,integral component of membrane; GO:0016413,O-acetyltransferase activity; GO:0071554,cell wall organization or biogenesis	PMR5 N terminal Domain
Cluster-10658.90101	TRUE	TRUE	TRUE	--	--	--	--	--	--	--
Cluster-10658.104171	TRUE	TRUE	TRUE	K22684 metacaspase-1 [EC:3.4.22.-] | (RefSeq) metacaspase-1-like (A)	PREDICTED: metacaspase-1-like [Daucus carota subsp. sativus]	RecName: Full=Metacaspase-1; Short=AtMC1; EC=3.4.22.-; AltName: Full=Metacaspase 1b; Short=AtMCP1b; AltName: Full=Protein LSD ONE LIKE 3;	SubName: Full=Uncharacterized protein {ECO:0000313|EMBL:KZM94826.1};	Metacaspase involved in regulation of apoptosis	GO:0004197,cysteine-type endopeptidase activity; GO:0006952,defense response; GO:0043068,positive regulation of programmed cell death	LSD1 zinc finger
Cluster-10658.104055	TRUE	TRUE	TRUE	K15095 (+)-neomenthol dehydrogenase [EC:1.1.1.208] | (RefSeq) (+)-neomenthol dehydrogenase-like (A)	PREDICTED: (+)-neomenthol dehydrogenase-like [Daucus carota subsp. sativus]	RecName: Full=Short-chain dehydrogenase/reductase 2b; Short=AtSDR2b; EC=1.1.1.-;	SubName: Full=Uncharacterized protein {ECO:0000313|EMBL:PIA31432.1};	Dehydrogenases with different specificities (related to short-chain alcohol dehydrogenases)	GO:0005829,cytosol; GO:0008106,alcohol dehydrogenase (NADP+) activity; GO:0055114,oxidation-reduction process	Enoyl-(Acyl carrier protein) reductase
Cluster-10658.103890	TRUE	TRUE	TRUE	K22395 cinnamyl-alcohol dehydrogenase [EC:1.1.1.195] | (RefSeq) tetrahydrocannabinolic acid synthase-like (A)	PREDICTED: tetrahydrocannabinolic acid synthase-like [Daucus carota subsp. sativus]	RecName: Full=Berberine bridge enzyme-like 11 {ECO:0000303|PubMed:26037923}; Short=AtBBE-like 11 {ECO:0000303|PubMed:26037923}; EC=1.1.1.- {ECO:0000250|UniProtKB:O64743}; Flags: Precursor;	SubName: Full=Uncharacterized protein {ECO:0000313|EMBL:KZM90442.1};	--	GO:0005618,cell wall; GO:0005576,extracellular region; GO:0050660,flavin adenine dinucleotide binding; GO:0016614,oxidoreductase activity, acting on CH-OH group of donors	FAD binding domain
Cluster-10658.94428	TRUE	TRUE	TRUE	K00261 glutamate dehydrogenase (NAD(P)+) [EC:1.4.1.3] | (RefSeq) glutamate dehydrogenase A (A)	PREDICTED: glutamate dehydrogenase A-like [Nicotiana tabacum]	RecName: Full=Glutamate dehydrogenase A; Short=GDH A; EC=1.4.1.3;	SubName: Full=glutamate dehydrogenase A-like {ECO:0000313|RefSeq:XP_016439691.1};	Glutamate/leucine/phenylalanine/valine dehydrogenases	GO:0004353,glutamate dehydrogenase [NAD(P)+] activity; GO:0006520,cellular amino acid metabolic process	Glutamate/Leucine/Phenylalanine/Valine dehydrogenase
Cluster-10658.96741	TRUE	TRUE	TRUE	--	hypothetical protein Ccrd_003091 [Cynara cardunculus var. scolymus]	--	SubName: Full=Uncharacterized protein {ECO:0000313|EMBL:KVH94839.1};	--	--	--
Cluster-10658.93424	TRUE	TRUE	TRUE	K22683 aspartyl protease family protein [EC:3.4.23.-] | (RefSeq) protein ASPARTIC PROTEASE IN GUARD CELL 1-like (A)	PREDICTED: protein ASPARTIC PROTEASE IN GUARD CELL 1-like [Daucus carota subsp. sativus]	RecName: Full=Protein ASPARTIC PROTEASE IN GUARD CELL 1; Short=AtASPG1; EC=3.4.23.-; Flags: Precursor;	SubName: Full=Uncharacterized protein {ECO:0000313|EMBL:KZN02593.1};	Aspartyl protease	GO:0005783,endoplasmic reticulum; GO:0004190,aspartic-type endopeptidase activity; GO:0070001,aspartic-type peptidase activity; GO:0003677,DNA binding; GO:0030163,protein catabolic process; GO:0009737,response to abscisic acid; GO:0009414,response to water deprivation; GO:0009627,systemic acquired resistance	Eukaryotic aspartyl protease
Cluster-10658.70490	TRUE	TRUE	TRUE	K03495 tRNA uridine 5-carboxymethylaminomethyl modification enzyme | (RefSeq) tRNA uridine 5-carboxymethylaminomethyl modification enzyme MnmG-like (A)	PREDICTED: uncharacterized protein LOC108227188 [Daucus carota subsp. sativus]	--	SubName: Full=Uncharacterized protein {ECO:0000313|EMBL:KZN09388.1};	--	--	--
Cluster-10658.133279	TRUE	TRUE	TRUE	K21396 ATP-binding cassette, subfamily G (WHITE), eye pigment precursor transporter | (RefSeq) ABC transporter G family member 41-like (A)	hypothetical protein POPTR_001G048800v3 [Populus trichocarpa]	RecName: Full=Pleiotropic drug resistance protein 1; AltName: Full=NtPDR1;	SubName: Full=Uncharacterized protein {ECO:0000313|EnsemblPlants:HORVU3Hr1G053350.38};	Pleiotropic drug resistance proteins (PDR1-15), ABC superfamily	GO:0016021,integral component of membrane; GO:0005524,ATP binding; GO:0016887,ATPase activity	ABC-2 type transporter
Cluster-10658.129963	TRUE	TRUE	TRUE	--	PREDICTED: PI-PLC X domain-containing protein At5g67130 [Daucus carota subsp. sativus]	RecName: Full=PI-PLC X domain-containing protein At5g67130; Flags: Precursor;	SubName: Full=Uncharacterized protein {ECO:0000313|EMBL:KZN02129.1};	--	GO:0046658,anchored component of plasma membrane; GO:0005886,plasma membrane; GO:0008081,phosphoric diester hydrolase activity; GO:0006629,lipid metabolic process	--
Cluster-10658.96752	TRUE	TRUE	TRUE	--	--	--	--	--	--	--
Cluster-10658.79820	TRUE	TRUE	TRUE	K12589 exosome complex component RRP42 | (RefSeq) Exosome complex component RRP42 (A)	PREDICTED: putative S-adenosyl-L-methionine-dependent methyltransferase MAB_0213c isoform X1 [Daucus carota subsp. sativus]	--	SubName: Full=uncharacterized protein LOC108982804 {ECO:0000313|RefSeq:XP_018809811.1};	--	--	Leucine carboxyl methyltransferase
Cluster-10658.167794	TRUE	TRUE	TRUE	--	uncharacterized protein LOC111383251 [Olea europaea var. sylvestris]	RecName: Full=Protein MARD1 {ECO:0000303|PubMed:15159630}; AltName: Full=Mediator of ABA-regulated dormancy1 {ECO:0000303|PubMed:15159630}; AltName: Full=Senescence-associated protein SAG102 {ECO:0000303|PubMed:11402199};	SubName: Full=Uncharacterized protein {ECO:0000313|EMBL:CDP09389.1};	--	GO:0010494,cytoplasmic stress granule; GO:0000932,P-body; GO:0046872,metal ion binding; GO:0009737,response to abscisic acid; GO:0010162,seed dormancy process	ECL1/2/3 zinc binding proteins
Cluster-10658.126039	TRUE	TRUE	TRUE	K10256 omega-6 fatty acid desaturase / acyl-lipid omega-6 desaturase (Delta-12 desaturase) [EC:1.14.19.6 1.14.19.22] | (RefSeq) delta(12)-fatty-acid desaturase FAD2-like (A)	PREDICTED: delta(12)-fatty-acid desaturase FAD2-like [Daucus carota subsp. sativus]	RecName: Full=Omega-6 fatty acid desaturase, endoplasmic reticulum isozyme 2; EC=1.14.19.-;	SubName: Full=Uncharacterized protein {ECO:0000313|EMBL:KZM84964.1};	--	GO:0005789,endoplasmic reticulum membrane; GO:0016021,integral component of membrane; GO:0016717,oxidoreductase activity, acting on paired donors, with oxidation of a pair of donors resulting in the reduction of molecular oxygen to two molecules of water; GO:0006636,unsaturated fatty acid biosynthetic process	Fatty acid desaturase
Cluster-10658.117281	TRUE	TRUE	TRUE	K13264 isoflavone 7-O-glucoside-6''-O-malonyltransferase [EC:2.3.1.115] | (RefSeq) AT133, GmAT133; malonyl-CoA:isoflavone 7-O-glucoside-6''-O-malonyltransferase (A)	PREDICTED: malonyl-coenzyme A:anthocyanin 3-O-glucoside-6''-O-malonyltransferase-like [Daucus carota subsp. sativus]	RecName: Full=Malonyl-coenzyme A:anthocyanin 3-O-glucoside-6''-O-malonyltransferase {ECO:0000303|PubMed:12481098}; Short=Dv3MaT {ECO:0000303|PubMed:12481098}; Short=Malonyl CoA:anthocyanin 3-O-glucoside-6''-O-malonyltransferase {ECO:0000312|EMBL:AAO12206.1}; EC=2.3.1.171;	SubName: Full=Uncharacterized protein {ECO:0000313|EMBL:KZM91413.1};	--	GO:0033809,anthocyanin 6''-O-malonyltransferase activity; GO:0102588,cyanidin 3-O-glucoside 6''-O-malonyltransferase activity; GO:0009698,phenylpropanoid metabolic process	Transferase family
Cluster-10658.54762	TRUE	TRUE	TRUE	K00901 diacylglycerol kinase (ATP) [EC:2.7.1.107] | (RefSeq) diacylglycerol kinase 5-like (A)	PREDICTED: diacylglycerol kinase 5-like [Juglans regia]	RecName: Full=Diacylglycerol kinase 5; Short=AtDGK5; Short=DAG kinase 5; EC=2.7.1.107; AltName: Full=Diglyceride kinase 5; Short=DGK 5;	SubName: Full=diacylglycerol kinase 5-like {ECO:0000313|RefSeq:XP_018851869.1};	Diacylglycerol kinase	GO:0005524,ATP binding; GO:0004143,diacylglycerol kinase activity; GO:0003951,NAD+ kinase activity; GO:0006952,defense response; GO:0007205,protein kinase C-activating G protein-coupled receptor signaling pathway	Diacylglycerol kinase accessory domain
Cluster-10658.105122	TRUE	TRUE	TRUE	K13449 pathogenesis-related protein 1 | (RefSeq) pathogenesis-related protein 1-like (A)	pathogenesis-related protein 1-like [Carica papaya]	RecName: Full=Basic form of pathogenesis-related protein 1; Short=PRP 1; Flags: Precursor;	SubName: Full=pathogenesis-related leaf protein 6-like {ECO:0000313|RefSeq:XP_010270273.1};	Defense-related protein containing SCP domain	GO:0005576,extracellular region; GO:0006952,defense response; GO:0009607,response to biotic stimulus	Cysteine-rich secretory protein family
Cluster-10658.119028	TRUE	TRUE	TRUE	K13379 reversibly glycosylated polypeptide / UDP-arabinopyranose mutase [EC:2.4.1.- 5.4.99.30] | (RefSeq) UDP-arabinopyranose mutase 3 (A)	UDP-arabinopyranose mutase 3 [Setaria italica]	RecName: Full=UDP-arabinopyranose mutase 3 {ECO:0000303|PubMed:17182701}; Short=OsUAM3 {ECO:0000303|PubMed:17182701}; EC=5.4.99.30 {ECO:0000269|PubMed:17182701, ECO:0000269|PubMed:20057139, ECO:0000269|PubMed:20149347}; AltName: Full=Reversibly glycosylated polypeptide 3 {ECO:0000303|PubMed:17182701}; AltName: Full=UDP-L-arabinose mutase 3 {ECO:0000305};	SubName: Full=Uncharacterized protein {ECO:0000313|EMBL:KQL26587.1, ECO:0000313|EnsemblPlants:Si030277m};	--	GO:0005829,cytosol; GO:0005794,Golgi apparatus; GO:0016866,intramolecular transferase activity; GO:0052691,UDP-arabinopyranose mutase activity; GO:0071555,cell wall organization; GO:0009832,plant-type cell wall biogenesis; GO:0033356,UDP-L-arabinose metabolic process	Reversibly glycosylated polypeptide
Cluster-10658.101626	TRUE	TRUE	TRUE	K01177 beta-amylase [EC:3.2.1.2] | (RefSeq) inactive beta-amylase 9 isoform X1 (A)	PREDICTED: inactive beta-amylase 9 [Daucus carota subsp. sativus]	RecName: Full=Inactive beta-amylase 9; AltName: Full=1,4-alpha-D-glucan maltohydrolase; AltName: Full=Inactive beta-amylase 3;	RecName: Full=Beta-amylase {ECO:0000256|RuleBase:RU000509}; EC=3.2.1.2 {ECO:0000256|RuleBase:RU000509};	--	GO:0005737,cytoplasm; GO:0016161,beta-amylase activity; GO:0000272,polysaccharide catabolic process	Glycosyl hydrolase family 14
Cluster-10658.100889	TRUE	TRUE	TRUE	K18693 diacylglycerol diphosphate phosphatase / phosphatidate phosphatase [EC:3.1.3.81 3.1.3.4] | (RefSeq) lipid phosphate phosphatase 1-like isoform X1 (A)	PREDICTED: lipid phosphate phosphatase 1-like isoform X1 [Daucus carota subsp. sativus]	RecName: Full=Putative lipid phosphate phosphatase 3, chloroplastic; Short=AtLPP3; EC=3.1.3.-; AltName: Full=Phosphatidate phosphohydrolase 3; AltName: Full=Phosphatidic acid phosphatase 3; Flags: Precursor;	SubName: Full=lipid phosphate phosphatase 2-like isoform X2 {ECO:0000313|RefSeq:XP_010279379.1};	Lipid phosphate phosphatase and related enzymes of the PAP2 family	GO:0031969,chloroplast membrane; GO:0005887,integral component of plasma membrane; GO:0005886,plasma membrane; GO:0008195,phosphatidate phosphatase activity; GO:0006644,phospholipid metabolic process	PAP2 superfamily
Cluster-10658.119888	TRUE	TRUE	TRUE	--	hypothetical protein CDL12_27424 [Handroanthus impetiginosus]	--	SubName: Full=Uncharacterized protein {ECO:0000313|EMBL:PIN00075.1};	U4/U6-associated splicing factor PRP4	--	--
Cluster-10658.119380	TRUE	TRUE	TRUE	K15472 premnaspirodiene oxygenase [EC:1.14.14.151] | (RefSeq) premnaspirodiene oxygenase (A)	RecName: Full=Cytochrome P450 CYP71D313 AEY75217.1 cytochrome P450 CYP71D313 [Panax ginseng]	RecName: Full=Cytochrome P450 CYP71D313; EC=1.14.-.-;	SubName: Full=Cytochrome P450 {ECO:0000313|EMBL:AED99873.1};	Cytochrome P450 CYP2 subfamily	GO:0016021,integral component of membrane; GO:0020037,heme binding; GO:0005506,iron ion binding; GO:0004497,monooxygenase activity; GO:0016705,oxidoreductase activity, acting on paired donors, with incorporation or reduction of molecular oxygen	Cytochrome P450
Cluster-10658.93815	TRUE	TRUE	TRUE	K16818 phospholipase A1 [EC:3.1.1.32] | (RefSeq) phospholipase A(1) DAD1, chloroplastic (A)	PREDICTED: phospholipase A1-Ibeta2, chloroplastic-like [Daucus carota subsp. sativus]	RecName: Full=Phospholipase A1-Ibeta2, chloroplastic; EC=3.1.1.-; Flags: Precursor;	SubName: Full=Uncharacterized protein {ECO:0000313|EMBL:KZN07501.1};	Predicted lipase	GO:0009507,chloroplast; GO:0047714,galactolipase activity; GO:0008970,phospholipase A1 activity; GO:0004806,triglyceride lipase activity; GO:0016042,lipid catabolic process	PGAP1-like protein
Cluster-10658.132665	TRUE	TRUE	TRUE	--	uncharacterized protein LOC110659962 [Hevea brasiliensis]	--	SubName: Full=Uncharacterized protein {ECO:0000313|EMBL:KZN06761.1};	--	--	--
Cluster-10658.101426	TRUE	TRUE	TRUE	K20727 defensin-like protein 16 | (RefSeq) defensin-like protein 3 (A)	hypothetical protein DCAR_028974 [Daucus carota subsp. sativus]	RecName: Full=Defensin-like protein 1; AltName: Full=Cysteine-rich antimicrobial protein 1; AltName: Full=Defensin AMP1; Short=CtAMP1;	SubName: Full=Uncharacterized protein {ECO:0000313|EMBL:KZM81361.1};	--	GO:0005576,extracellular region; GO:0050832,defense response to fungus; GO:0031640,killing of cells of other organism	S locus-related glycoprotein 1 binding pollen coat protein (SLR1-BP)
Cluster-10658.145985	TRUE	TRUE	TRUE	K22534 PR domain zinc finger protein 5 | (RefSeq) zinc finger protein ZAT4-like (A)	PREDICTED: zinc finger protein ZAT10 [Vitis vinifera]	RecName: Full=Zinc finger protein ZAT10; AltName: Full=Salt-tolerance zinc finger;	SubName: Full=Uncharacterized protein {ECO:0000313|EMBL:CCB47705.1};	FOG: Zn-finger	GO:0005634,nucleus; GO:0003700,DNA-binding transcription factor activity; GO:0046872,metal ion binding; GO:0043565,sequence-specific DNA binding; GO:0035264,multicellular organism growth; GO:0045892,negative regulation of transcription, DNA-templated; GO:0010117,photoprotection; GO:0015979,photosynthesis; GO:0009737,response to abscisic acid; GO:0010200,response to chitin; GO:0009409,response to …	Zinc finger, C2H2 type
Cluster-10658.116894	TRUE	TRUE	TRUE	K01784 UDP-glucose 4-epimerase [EC:5.1.3.2] | (RefSeq) UDP-glucose 4-epimerase GEPI48 (A)	UDP-glucose 4-epimerase GEPI48 [Cucurbita maxima]	RecName: Full=UDP-glucose 4-epimerase GEPI48; EC=5.1.3.2; AltName: Full=Galactowaldenase; AltName: Full=UDP-galactose 4-epimerase;	SubName: Full=UDP-glucose 4-epimerase GEPI48-like {ECO:0000313|RefSeq:XP_016510080.1};	UDP-glucose 4-epimerase/UDP-sulfoquinovose synthase	GO:0003978,UDP-glucose 4-epimerase activity; GO:0006012,galactose metabolic process	NAD(P)H-binding
Cluster-10658.104515	TRUE	TRUE	TRUE	--	PREDICTED: zinc finger A20 and AN1 domain-containing stress-associated protein 4-like [Daucus carota subsp. sativus]	RecName: Full=Zinc finger A20 and AN1 domain-containing stress-associated protein 4; Short=AtSAP4;	SubName: Full=Uncharacterized protein {ECO:0000313|EMBL:KZM99259.1};	Predicted Zn-finger protein	GO:0003677,DNA binding; GO:0008270,zinc ion binding	AN1-like Zinc finger
Cluster-10658.104553	TRUE	TRUE	TRUE	K09286 EREBP-like factor | (RefSeq) hypothetical protein (A)	unnamed protein product, partial [Vitis vinifera]	RecName: Full=Ethylene-responsive transcription factor ABR1; AltName: Full=Protein ABA REPRESSOR 1;	SubName: Full=Uncharacterized protein {ECO:0000313|EMBL:CAN66025.1};	--	GO:0005634,nucleus; GO:0003677,DNA binding; GO:0003700,DNA-binding transcription factor activity; GO:0009738,abscisic acid-activated signaling pathway; GO:0050832,defense response to fungus; GO:0009873,ethylene-activated signaling pathway; GO:0009788,negative regulation of abscisic acid-activated signaling pathway; GO:0009737,response to abscisic acid; GO:0009749,response to glucose; GO:0006970,r…	AP2 domain
Cluster-10658.106288	TRUE	TRUE	TRUE	--	uncharacterized protein LOC111411594 [Olea europaea var. sylvestris]	--	SubName: Full=Uncharacterized protein {ECO:0000313|EMBL:KZM90574.1};	--	GO:0009055,electron transfer activity	Plastocyanin-like domain
Cluster-10658.77341	TRUE	TRUE	TRUE	K09286 EREBP-like factor | (RefSeq) EREBP-3, ERF-3, ERF3, ERF4, NtERF3; ethylene-responsive transcription factor 4 (A)	PREDICTED: ethylene-responsive transcription factor 4-like [Solanum tuberosum]	RecName: Full=Ethylene-responsive transcription factor 4; AltName: Full=Ethylene-responsive element-binding factor 3; Short=EREBP-3; AltName: Full=Ethylene-responsive element-binding factor 4 homolog; AltName: Full=NtERF3;	SubName: Full=Uncharacterized protein {ECO:0000313|EnsemblPlants:PGSC0003DMT400068959};	--	GO:0005634,nucleus; GO:0003677,DNA binding; GO:0003700,DNA-binding transcription factor activity; GO:0006952,defense response; GO:0009873,ethylene-activated signaling pathway; GO:0006351,transcription, DNA-templated	AP2 domain
Cluster-10658.96787	TRUE	TRUE	TRUE	K08332 vacuolar protein 8 | (RefSeq) hypothetical protein (A)	PREDICTED: U-box domain-containing protein 16 [Daucus carota subsp. sativus]	RecName: Full=U-box domain-containing protein 16; EC=2.3.2.27; AltName: Full=Plant U-box protein 16; AltName: Full=RING-type E3 ubiquitin transferase PUB16 {ECO:0000305};	RecName: Full=RING-type E3 ubiquitin transferase {ECO:0000256|SAAS:SAAS00702733}; EC=2.3.2.27 {ECO:0000256|SAAS:SAAS00702733};	FOG: Armadillo/beta-catenin-like repeats	GO:0005737,cytoplasm; GO:0005634,nucleus; GO:0004842,ubiquitin-protein transferase activity; GO:0010200,response to chitin	Armadillo/beta-catenin-like repeat
Cluster-10658.149572	TRUE	TRUE	TRUE	K23280 rhamnogalacturonan I rhamnosyltransferase [EC:2.4.1.351] | (RefSeq) hypothetical protein (A)	PREDICTED: uncharacterized protein LOC108204908 [Daucus carota subsp. sativus]	RecName: Full=Protein EMBRYO SAC DEVELOPMENT ARREST 30 {ECO:0000303|PubMed:15634699}; EC=2.4.1.- {ECO:0000305}; AltName: Full=O-fucosyltransferase 22 {ECO:0000305}; Short=O-FucT-22 {ECO:0000305}; AltName: Full=O-fucosyltransferase family protein {ECO:0000305}; AltName: Full=Protein TUBE GROWTH DEFECTIVE 1 {ECO:0000303|PubMed:19237690};	SubName: Full=Uncharacterized protein {ECO:0000313|EMBL:KZN10739.1};	--	GO:0009507,chloroplast; GO:0005794,Golgi apparatus; GO:0016021,integral component of membrane; GO:0016757,transferase activity, transferring glycosyl groups; GO:0006004,fucose metabolic process; GO:0010197,polar nucleus fusion; GO:0048868,pollen tube development; GO:0006486,protein glycosylation	GDP-fucose protein O-fucosyltransferase
Cluster-10658.39500	TRUE	TRUE	TRUE	K00311 electron-transferring-flavoprotein dehydrogenase [EC:1.5.5.1] | (RefSeq) electron transfer flavoprotein-ubiquinone oxidoreductase, mitochondrial (A)	PREDICTED: electron transfer flavoprotein-ubiquinone oxidoreductase, mitochondrial [Daucus carota subsp. sativus]	RecName: Full=Electron transfer flavoprotein-ubiquinone oxidoreductase, mitochondrial; Short=ETF-QO; Short=ETF-ubiquinone oxidoreductase; EC=1.5.5.1; Flags: Precursor;	SubName: Full=Uncharacterized protein {ECO:0000313|EMBL:PIA29622.1};	Electron transfer flavoprotein ubiquinone oxidoreductase	GO:0031305,integral component of mitochondrial inner membrane; GO:0017133,mitochondrial electron transfer flavoprotein complex; GO:0005739,mitochondrion; GO:0051539,4 iron, 4 sulfur cluster binding; GO:0009055,electron transfer activity; GO:0004174,electron-transferring-flavoprotein dehydrogenase activity; GO:0046872,metal ion binding; GO:0043783,oxidoreductase activity, oxidizing metal ions with…	--
Cluster-10658.98188	TRUE	TRUE	TRUE	K04733 interleukin-1 receptor-associated kinase 4 [EC:2.7.11.1] | (RefSeq) probable LRR receptor-like serine/threonine-protein kinase At1g51880 (A)	PREDICTED: heavy metal-associated isoprenylated plant protein 3-like [Daucus carota subsp. sativus]	RecName: Full=Heavy metal-associated isoprenylated plant protein 39 {ECO:0000303|PubMed:21072340, ECO:0000303|PubMed:23368984}; Short=AtHIP39 {ECO:0000303|PubMed:21072340, ECO:0000303|PubMed:23368984}; Flags: Precursor;	SubName: Full=heavy metal-associated isoprenylated plant protein 3-like isoform X1 {ECO:0000313|RefSeq:XP_018838608.1};	Copper chaperone	GO:0005737,cytoplasm; GO:0046914,transition metal ion binding; GO:0046916,cellular transition metal ion homeostasis; GO:0030001,metal ion transport	Heavy-metal-associated domain
Cluster-10658.51491	TRUE	TRUE	TRUE	--	PREDICTED: protein EXORDIUM-like 3 [Daucus carota subsp. sativus]	RecName: Full=Protein EXORDIUM-like 3; Flags: Precursor;	SubName: Full=Uncharacterized protein {ECO:0000313|EMBL:KZM94877.1};	--	GO:0048046,apoplast; GO:0005615,extracellular space; GO:0009505,plant-type cell wall; GO:0009506,plasmodesma; GO:0080167,response to karrikin	Phosphate-induced protein 1 conserved region
Cluster-10658.114556	TRUE	TRUE	TRUE	--	PREDICTED: uncharacterized protein LOC108222137 [Daucus carota subsp. sativus]	--	SubName: Full=Uncharacterized protein {ECO:0000313|EMBL:KZM96047.1};	--	--	--
Cluster-10658.116562	TRUE	TRUE	TRUE	K04125 gibberellin 2-oxidase [EC:1.14.11.13] | (RefSeq) GA2ox4, GA2ox5; gibberellin 2-beta-dioxygenase 2 (A)	neutral invertase [Daucus carota]	RecName: Full=Probable alkaline/neutral invertase A, chloroplastic {ECO:0000305}; Short=A/N-INVA {ECO:0000303|PubMed:21441406}; EC=3.2.1.26 {ECO:0000250|UniProtKB:Q9FXA8}; Flags: Precursor;	SubName: Full=Neutral invertase {ECO:0000313|EMBL:CAA76145.1}; EC=3.2.1.26 {ECO:0000313|EMBL:CAA76145.1};	--	GO:0009507,chloroplast; GO:0005739,mitochondrion; GO:0033926,glycopeptide alpha-N-acetylgalactosaminidase activity; GO:0004575,sucrose alpha-glucosidase activity; GO:0005975,carbohydrate metabolic process	Alkaline and neutral invertase
Cluster-10658.109758	TRUE	TRUE	TRUE	K15015 solute carrier family 32 (vesicular inhibitory amino acid transporter) | (RefSeq) lysine histidine transporter-like 2 (A)	lysine histidine transporter [Panax ginseng]	RecName: Full=Lysine histidine transporter 1;	SubName: Full=Lysine histidine transporter {ECO:0000313|EMBL:AGN03890.1};	Amino acid transporters	GO:0016021,integral component of membrane; GO:0005886,plasma membrane; GO:0015171,amino acid transmembrane transporter activity; GO:0015293,symporter activity; GO:0043090,amino acid import; GO:0080167,response to karrikin	Tryptophan/tyrosine permease family
Cluster-10658.101912	TRUE	TRUE	TRUE	K05894 12-oxophytodienoic acid reductase [EC:1.3.1.42] | (RefSeq) putative 12-oxophytodienoate reductase 11 isoform X1 (A)	putative 12-oxophytodienoate reductase 11 isoform X1 [Hevea brasiliensis]	RecName: Full=12-oxophytodienoate reductase 2; EC=1.3.1.42; AltName: Full=12-oxophytodienoate-10,11-reductase 2; Short=AtOPR2; Short=OPDA-reductase 2;	SubName: Full=Uncharacterized protein {ECO:0000313|EMBL:OMO88063.1};	NADH:flavin oxidoreductase/12-oxophytodienoate reductase	GO:0005737,cytoplasm; GO:0005622,intracellular; GO:0016629,12-oxophytodienoate reductase activity; GO:0010181,FMN binding; GO:0055114,oxidation-reduction process; GO:0031408,oxylipin biosynthetic process; GO:0009611,response to wounding	NADH:flavin oxidoreductase / NADH oxidase family
Cluster-10658.128607	TRUE	TRUE	TRUE	--	PREDICTED: uncharacterized protein LOC108215462 isoform X1 [Daucus carota subsp. sativus]	--	SubName: Full=Uncharacterized protein {ECO:0000313|EMBL:OAY27246.1};	--	--	Munc13 (mammalian uncoordinated) homology domain
Cluster-10658.102065	TRUE	TRUE	TRUE	K13433 pathogenesis-related genes transcriptional activator PTI5 | (RefSeq) pathogenesis-related genes transcriptional activator PTI5-like (A)	PREDICTED: pathogenesis-related genes transcriptional activator PTI5-like [Daucus carota subsp. sativus]	RecName: Full=Pathogenesis-related genes transcriptional activator PTI5; AltName: Full=PTO-interacting protein 5;	SubName: Full=Uncharacterized protein {ECO:0000313|EMBL:KZN05746.1};	--	GO:0005634,nucleus; GO:0003677,DNA binding; GO:0003700,DNA-binding transcription factor activity; GO:0006952,defense response; GO:0006351,transcription, DNA-templated	AP2 domain
Cluster-10658.102679	TRUE	TRUE	TRUE	K16040 trans-resveratrol di-O-methyltransferase [EC:2.1.1.240] | (RefSeq) trans-resveratrol di-O-methyltransferase-like (A)	unnamed protein product, partial [Vitis vinifera]	RecName: Full=Trans-resveratrol di-O-methyltransferase; EC=2.1.1.240; AltName: Full=Resveratrol O-methyltransferase; Short=ROMT; Short=VvROMT;	SubName: Full=Uncharacterized protein {ECO:0000313|EnsemblPlants:Solyc10g008120.2.1};	Hydroxyindole-O-methyltransferase and related SAM-dependent methyltransferases	GO:0008171,O-methyltransferase activity; GO:0046983,protein dimerization activity; GO:0102303,resveratrol 3,5-O-dimethyltransferase activity; GO:0008757,S-adenosylmethionine-dependent methyltransferase activity; GO:0019438,aromatic compound biosynthetic process	O-methyltransferase domain
Cluster-10658.142732	TRUE	TRUE	TRUE	--	PREDICTED: uncharacterized protein LOC104087903 [Nicotiana tomentosiformis]	RecName: Full=Protein MARD1 {ECO:0000303|PubMed:15159630}; AltName: Full=Mediator of ABA-regulated dormancy1 {ECO:0000303|PubMed:15159630}; AltName: Full=Senescence-associated protein SAG102 {ECO:0000303|PubMed:11402199};	SubName: Full=uncharacterized protein LOC107766503 isoform X1 {ECO:0000313|RefSeq:XP_016440787.1};	--	GO:0010494,cytoplasmic stress granule; GO:0000932,P-body; GO:0046872,metal ion binding; GO:0009737,response to abscisic acid; GO:0010162,seed dormancy process	PLATZ transcription factor
Cluster-10658.63225	TRUE	TRUE	TRUE	K13448 calcium-binding protein CML | (RefSeq) hypothetical protein (A)	hypothetical protein CISIN_1g037913mg [Citrus sinensis]	RecName: Full=Calcium-binding protein CML38; AltName: Full=Calmodulin-like protein 38;	SubName: Full=Uncharacterized protein {ECO:0000313|EMBL:KDO55620.1};	Calmodulin and related proteins (EF-Hand superfamily)	GO:0005886,plasma membrane; GO:0005509,calcium ion binding; GO:0009611,response to wounding	EF hand
Cluster-10658.87529	TRUE	TRUE	TRUE	K00737 beta-1,4-mannosyl-glycoprotein beta-1,4-N-acetylglucosaminyltransferase [EC:2.4.1.144] | (RefSeq) beta-1,4-mannosyl-glycoprotein 4-beta-N-acetylglucosaminyltransferase-like (A)	Glycosyl transferase, family 17 [Cynara cardunculus var. scolymus]	--	SubName: Full=Glycosyl transferase, family 17 {ECO:0000313|EMBL:KVH95661.1};	--	GO:0016021,integral component of membrane; GO:0003830,beta-1,4-mannosylglycoprotein 4-beta-N-acetylglucosaminyltransferase activity; GO:0006487,protein N-linked glycosylation	Glycosyltransferase family 17
Cluster-10658.110941	TRUE	TRUE	TRUE	--	uncharacterized protein LOC110646443 [Hevea brasiliensis]	--	SubName: Full=uncharacterized protein LOC104235482 {ECO:0000313|RefSeq:XP_009787596.1};	Predicted hydrolase/acyltransferase (alpha/beta hydrolase superfamily)	GO:0016021,integral component of membrane	Cholesterol-capturing domain
Cluster-10658.124127	TRUE	TRUE	TRUE	--	PREDICTED: uncharacterized protein LOC108197747 [Daucus carota subsp. sativus]	--	SubName: Full=Uncharacterized protein {ECO:0000313|EMBL:KZM83787.1};	--	--	PAR1 protein
Cluster-10658.105037	TRUE	TRUE	TRUE	--	PREDICTED: uncharacterized protein LOC108226107 [Daucus carota subsp. sativus]	--	SubName: Full=Uncharacterized protein {ECO:0000313|EMBL:KZM90809.1};	--	GO:0016021,integral component of membrane	--
Cluster-10658.83126	TRUE	TRUE	TRUE	K09286 EREBP-like factor | (RefSeq) hypothetical protein (A)	embryonic element binding Factor 8, partial [Daucus carota]	RecName: Full=Ethylene-responsive transcription factor ERF017;	SubName: Full=Embryonic element binding Factor 8 {ECO:0000313|EMBL:BAF47194.1}; Flags: Fragment;	--	GO:0005634,nucleus; GO:0003677,DNA binding; GO:0003700,DNA-binding transcription factor activity; GO:0009873,ethylene-activated signaling pathway; GO:0006351,transcription, DNA-templated	AP2 domain
Cluster-10658.108996	TRUE	TRUE	TRUE	K05715 2-phosphoglycerate kinase [EC:2.7.2.-] | (RefSeq) P-loop NTPase domain-containing protein LPA1 homolog 2-like (A)	PREDICTED: P-loop NTPase domain-containing protein LPA1 homolog 2-like [Daucus carota subsp. sativus]	RecName: Full=P-loop NTPase domain-containing protein LPA1 homolog 1 {ECO:0000305}; AltName: Full=Protein LOW PHYTIC ACID 1 homolog 1 {ECO:0000305};	SubName: Full=Uncharacterized protein {ECO:0000313|EMBL:CCB44242.1};	--	GO:0010264,myo-inositol hexakisphosphate biosynthetic process	RsgA GTPase
Cluster-10658.98427	TRUE	TRUE	TRUE	--	PREDICTED: uncharacterized protein LOC108227641 [Daucus carota subsp. sativus]	RecName: Full=Chaperonin-like RbcX protein 2, chloroplastic {ECO:0000303|PubMed:21922322}; Short=AtRBCX2 {ECO:0000303|PubMed:21922322}; Flags: Precursor;	SubName: Full=Uncharacterized protein {ECO:0000313|EMBL:KZN09416.1};	--	GO:0009570,chloroplast stroma; GO:0044183,protein binding involved in protein folding; GO:0061077,chaperone-mediated protein folding	RbcX protein
Cluster-10658.82977	TRUE	TRUE	TRUE	--	PREDICTED: uncharacterized protein LOC18598931 [Theobroma cacao]	--	SubName: Full=Uncharacterized protein {ECO:0000313|EMBL:OAY43209.1};	--	--	--
Cluster-10658.102870	TRUE	TRUE	TRUE	--	PREDICTED: protein BPS1, chloroplastic [Daucus carota subsp. sativus]	RecName: Full=Protein BPS1, chloroplastic; AltName: Full=Protein BYPASS 1; Flags: Precursor;	SubName: Full=Uncharacterized protein {ECO:0000313|EMBL:KZN07791.1};	--	GO:0009507,chloroplast; GO:0005886,plasma membrane; GO:0009793,embryo development ending in seed dormancy; GO:0048364,root development; GO:0048367,shoot system development	Arabidopsis protein of unknown function
Cluster-10658.107356	TRUE	TRUE	TRUE	K01206 alpha-L-fucosidase [EC:3.2.1.51] | (RefSeq) alpha-L-fucosidase 3-like (A)	esterase [Prunus persica]	RecName: Full=Esterase; EC=3.1.1.-; AltName: Full=Early nodule-specific protein homolog; AltName: Full=Latex allergen Hev b 13; AltName: Allergen=Hev b 13; Flags: Precursor;	SubName: Full=Uncharacterized protein {ECO:0000313|EMBL:ONI34766.1};	--	GO:0016788,hydrolase activity, acting on ester bonds; GO:0019863,IgE binding; GO:0006952,defense response	GDSL-like Lipase/Acylhydrolase
Cluster-10658.85717	TRUE	TRUE	TRUE	K13425 WRKY transcription factor 22 | (RefSeq) probable WRKY transcription factor 29 (A)	hypothetical protein DCAR_004610 [Daucus carota subsp. sativus]	RecName: Full=WRKY transcription factor 22; AltName: Full=WRKY DNA-binding protein 22;	SubName: Full=Uncharacterized protein {ECO:0000313|EMBL:KZN11954.1};	--	GO:0005634,nucleus; GO:0003700,DNA-binding transcription factor activity; GO:0043565,sequence-specific DNA binding; GO:0006952,defense response; GO:0010150,leaf senescence; GO:0010200,response to chitin; GO:0006351,transcription, DNA-templated	WRKY DNA -binding domain
Cluster-10658.103139	TRUE	TRUE	TRUE	K22133 oxalate---CoA ligase [EC:6.2.1.8] | (RefSeq) oxalate--CoA ligase (A)	unnamed protein product, partial [Vitis vinifera]	RecName: Full=Oxalate--CoA ligase {ECO:0000305}; EC=6.2.1.8 {ECO:0000269|PubMed:22447686}; AltName: Full=4-coumarate--CoA ligase isoform 8; Short=At4CL8; AltName: Full=4-coumarate--CoA ligase-like 10; AltName: Full=Acyl-activating enzyme 3 {ECO:0000303|PubMed:22447686}; AltName: Full=Adenosine monophosphate binding protein 3; Short=AtMPBP3; AltName: Full=Oxalyl-CoA synthetase;	SubName: Full=Uncharacterized protein {ECO:0000313|EMBL:CBI22725.3};	Acyl-CoA synthetase	GO:0048046,apoplast; GO:0009507,chloroplast; GO:0009570,chloroplast stroma; GO:0005737,cytoplasm; GO:0009506,plasmodesma; GO:0005524,ATP binding; GO:0050203,oxalate-CoA ligase activity; GO:0050832,defense response to fungus; GO:0033611,oxalate catabolic process; GO:0010030,positive regulation of seed germination; GO:0046686,response to cadmium ion; GO:0009735,response to cytokinin; GO:0010214,see…	AMP-binding enzyme C-terminal domain
Cluster-10658.95677	TRUE	TRUE	TRUE	K01673 carbonic anhydrase [EC:4.2.1.1] | (RefSeq) carbonic anhydrase 2 isoform X1 (A)	PREDICTED: carbonic anhydrase 2 isoform X1 [Daucus carota subsp. sativus]	RecName: Full=Carbonic anhydrase, chloroplastic; EC=4.2.1.1; AltName: Full=Carbonate dehydratase; Flags: Precursor;	RecName: Full=Carbonic anhydrase {ECO:0000256|RuleBase:RU003956}; EC=4.2.1.1 {ECO:0000256|RuleBase:RU003956}; AltName: Full=Carbonate dehydratase {ECO:0000256|RuleBase:RU003956};	Predicted carbonic anhydrase involved in protection against oxidative damage	GO:0009570,chloroplast stroma; GO:0004089,carbonate dehydratase activity; GO:0008270,zinc ion binding; GO:0015976,carbon utilization	Carbonic anhydrase
Cluster-10658.66750	TRUE	TRUE	TRUE	K04733 interleukin-1 receptor-associated kinase 4 [EC:2.7.11.1] | (RefSeq) probable receptor-like serine/threonine-protein kinase At5g57670 isoform X1 (A)	PREDICTED: probable receptor-like serine/threonine-protein kinase At5g57670 [Daucus carota subsp. sativus]	RecName: Full=Ubiquitin-conjugating enzyme E2-17 kDa; EC=2.3.2.23; AltName: Full=E2 ubiquitin-conjugating enzyme; AltName: Full=Ubiquitin carrier protein; AltName: Full=Ubiquitin-protein ligase;	SubName: Full=Uncharacterized protein {ECO:0000313|EMBL:KZN10512.1};	--	GO:0005524,ATP binding; GO:0016740,transferase activity; GO:0016567,protein ubiquitination	Phosphotransferase enzyme family
Cluster-10658.52525	TRUE	TRUE	TRUE	K22733 magnesium transporter | (RefSeq) uncharacterized LOC100244618 (A)	hypothetical protein DCAR_016013 [Daucus carota subsp. sativus]	RecName: Full=BON1-associated protein 2; AltName: Full=Protein BON1-ASSOCIATED PROTEIN 1-LIKE;	SubName: Full=Uncharacterized protein {ECO:0000313|EMBL:KZM96625.1};	--	GO:0016020,membrane; GO:0006952,defense response	C2 domain
Cluster-10658.100180	TRUE	TRUE	TRUE	K13425 WRKY transcription factor 22 | (RefSeq) probable WRKY transcription factor 27 (A)	WRKY1 [Panax quinquefolius]	RecName: Full=Probable WRKY transcription factor 7; AltName: Full=WRKY DNA-binding protein 7;	SubName: Full=WRKY1 {ECO:0000313|EMBL:AEQ29014.1};	--	GO:0005634,nucleus; GO:0005516,calmodulin binding; GO:0003700,DNA-binding transcription factor activity; GO:0043565,sequence-specific DNA binding; GO:0006351,transcription, DNA-templated	--
Cluster-10658.96853	TRUE	TRUE	TRUE	K09338 homeobox-leucine zipper protein | (RefSeq) homeobox-leucine zipper protein ATHB-12-like isoform X1 (A)	homeobox-leucine zipper protein ATHB-12-like isoform X1 [Manihot esculenta]	RecName: Full=Homeobox-leucine zipper protein ATHB-7; AltName: Full=HD-ZIP protein ATHB-7; AltName: Full=Homeodomain transcription factor ATHB-7;	SubName: Full=Uncharacterized protein {ECO:0000313|EMBL:OAY48960.1};	Transcription factor HEX, contains HOX and HALZ domains	GO:0005634,nucleus; GO:0003700,DNA-binding transcription factor activity; GO:0043565,sequence-specific DNA binding; GO:0045893,positive regulation of transcription, DNA-templated; GO:0009737,response to abscisic acid; GO:0009414,response to water deprivation; GO:0006351,transcription, DNA-templated	Homeobox KN domain
Cluster-10658.77105	TRUE	TRUE	TRUE	--	hypothetical protein DCAR_001639 [Daucus carota subsp. sativus]	--	SubName: Full=Uncharacterized protein {ECO:0000313|EMBL:KZN08983.1};	--	GO:0004061,arylformamidase activity; GO:0019441,tryptophan catabolic process to kynurenine	Putative cyclase
Cluster-10658.28497	TRUE	TRUE	TRUE	--	PREDICTED: GEM-like protein 4 [Daucus carota subsp. sativus]	RecName: Full=GEM-like protein 6;	SubName: Full=Uncharacterized protein {ECO:0000313|EMBL:CCB58931.1};	--	--	GRAM domain
Cluster-10658.89692	TRUE	TRUE	TRUE	K08511 vesicle-associated membrane protein 72 | (RefSeq) vesicle-associated membrane protein 724 (A)	PREDICTED: vesicle-associated membrane protein 724 [Nicotiana tomentosiformis]	RecName: Full=Vesicle-associated membrane protein 724 {ECO:0000303|PubMed:11115874}; Short=AtVAMP724 {ECO:0000303|PubMed:11115874}; AltName: Full=SYBL1-like protein {ECO:0000303|PubMed:9461215};	SubName: Full=vesicle-associated membrane protein 724-like {ECO:0000313|RefSeq:XP_016505785.1};	Synaptobrevin/VAMP-like protein	GO:0031901,early endosome membrane; GO:0016021,integral component of membrane; GO:0005886,plasma membrane; GO:0031201,SNARE complex; GO:0005484,SNAP receptor activity; GO:0000149,SNARE binding; GO:0006887,exocytosis; GO:0015031,protein transport; GO:0006906,vesicle fusion	Synaptobrevin
Cluster-10658.108659	TRUE	TRUE	TRUE	K00700 1,4-alpha-glucan branching enzyme [EC:2.4.1.18] | (RefSeq) 1,4-alpha-glucan-branching enzyme 1, chloroplastic/amyloplastic-like isoform X1 (A)	PREDICTED: 1,4-alpha-glucan-branching enzyme 1, chloroplastic/amyloplastic-like isoform X2 [Daucus carota subsp. sativus]	RecName: Full=1,4-alpha-glucan-branching enzyme; EC=2.4.1.18; AltName: Full=Q-enzyme; AltName: Full=Starch-branching enzyme;	SubName: Full=Uncharacterized protein {ECO:0000313|EMBL:CBI18866.3};	1,4-alpha-glucan branching enzyme/starch branching enzyme II	GO:0009501,amyloplast; GO:0009507,chloroplast; GO:0003844,1,4-alpha-glucan branching enzyme activity; GO:0102752,1,4-alpha-glucan branching enzyme activity (using a glucosylated glycogenin as primer for glycogen synthesis); GO:0043169,cation binding; GO:0004553,hydrolase activity, hydrolyzing O-glycosyl compounds; GO:0005978,glycogen biosynthetic process; GO:0019252,starch biosynthetic process	Alpha amylase, catalytic domain
Cluster-10658.75350	TRUE	TRUE	TRUE	K17361 acyl-coenzyme A thioesterase 9 [EC:3.1.2.-] | (RefSeq) acyl-coenzyme A thioesterase 9, mitochondrial-like (A)	acyl-coenzyme A thioesterase 9, mitochondrial-like [Olea europaea var. sylvestris]	--	SubName: Full=Uncharacterized protein {ECO:0000313|EnsemblPlants:Solyc12g019490.1.1};	Acyl-CoA thioesterase	--	Thioesterase superfamily
Cluster-10658.127044	TRUE	TRUE	TRUE	--	hypothetical protein DCAR_016013 [Daucus carota subsp. sativus]	RecName: Full=BON1-associated protein 2; AltName: Full=Protein BON1-ASSOCIATED PROTEIN 1-LIKE;	SubName: Full=Uncharacterized protein {ECO:0000313|EMBL:KZM96625.1};	--	GO:0016020,membrane; GO:0006952,defense response	C2 domain
Cluster-10658.97297	TRUE	TRUE	TRUE	--	PREDICTED: protein BPS1, chloroplastic-like [Daucus carota subsp. sativus]	RecName: Full=Protein BPS1, chloroplastic; AltName: Full=Protein BYPASS 1; Flags: Precursor;	SubName: Full=DUF793 domain-containing protein {ECO:0000313|EMBL:GAV81623.1};	--	GO:0009507,chloroplast; GO:0005886,plasma membrane; GO:0009793,embryo development ending in seed dormancy; GO:0048364,root development; GO:0048367,shoot system development	N-terminal domain on NACHT_NTPase and P-loop NTPases
Cluster-10658.114019	TRUE	TRUE	TRUE	K22389 phospholipase A1 [EC:3.1.1.32] | (RefSeq) lecithin-cholesterol acyltransferase-like 4 (A)	PREDICTED: lecithin-cholesterol acyltransferase-like 4 [Daucus carota subsp. sativus]	RecName: Full=Lecithin-cholesterol acyltransferase-like 4; EC=2.3.1.-;	SubName: Full=Uncharacterized protein {ECO:0000313|EMBL:KZN08257.1};	Lecithin:cholesterol acyltransferase (LCAT)/Acyl-ceramide synthase	GO:0005829,cytosol; GO:0008374,O-acyltransferase activity; GO:0004620,phospholipase activity; GO:0009395,phospholipid catabolic process	Serine aminopeptidase, S33
Cluster-10658.51445	TRUE	TRUE	TRUE	K01087 trehalose 6-phosphate phosphatase [EC:3.1.3.12] | (RefSeq) trehalose-phosphate phosphatase A-like (A)	trehalose-phosphate phosphatase A-like, partial [Cajanus cajan]	RecName: Full=Probable trehalose-phosphate phosphatase G; Short=AtTPPG; EC=3.1.3.12; AltName: Full=Trehalose 6-phosphate phosphatase; AltName: Full=Trehalose-phosphate phosphatase 6;	RecName: Full=Trehalose 6-phosphate phosphatase {ECO:0000256|RuleBase:RU361117}; EC=3.1.3.12 {ECO:0000256|RuleBase:RU361117};	Trehalose-6-phosphate synthase component TPS1 and related subunits	GO:0004805,trehalose-phosphatase activity; GO:0005992,trehalose biosynthetic process	--
Cluster-10658.100566	TRUE	TRUE	TRUE	K11153 retinol dehydrogenase 12 [EC:1.1.1.300] | (RefSeq) short-chain dehydrogenase TIC 32, chloroplastic-like (A)	PREDICTED: short-chain dehydrogenase TIC 32, chloroplastic-like [Daucus carota subsp. sativus]	RecName: Full=Short-chain dehydrogenase TIC 32, chloroplastic; EC=1.1.1.-; AltName: Full=Translocon at the inner envelope membrane of chloroplasts 32; Short=PsTIC32;	SubName: Full=Uncharacterized protein {ECO:0000313|EMBL:KZN11969.1};	Dehydrogenases with different specificities (related to short-chain alcohol dehydrogenases)	GO:0009706,chloroplast inner membrane; GO:0005516,calmodulin binding; GO:0016491,oxidoreductase activity; GO:0015031,protein transport	--
Cluster-10658.95778	TRUE	TRUE	TRUE	K08869 aarF domain-containing kinase | (RefSeq) putative aarF domain-containing protein kinase 1 (A)	embryo-abundant family protein [Populus trichocarpa]	--	SubName: Full=Embryo-abundant family protein {ECO:0000313|EMBL:EEE92424.1};	Methyltransferase	GO:0005737,cytoplasm; GO:0008757,S-adenosylmethionine-dependent methyltransferase activity; GO:0032259,methylation	Methyltransferase domain
Cluster-10658.92973	TRUE	TRUE	TRUE	--	hypothetical protein DCAR_029923 [Daucus carota subsp. sativus]	--	SubName: Full=Uncharacterized protein {ECO:0000313|EMBL:KZM82354.1};	Predicted methyltransferase	GO:0016021,integral component of membrane	--
Cluster-10658.16593	TRUE	TRUE	TRUE	K11982 E3 ubiquitin-protein ligase RNF115/126 [EC:2.3.2.27] | (RefSeq) RING-H2 finger protein ATL3-like (A)	PREDICTED: RING-H2 finger protein ATL3 [Daucus carota subsp. sativus]	RecName: Full=RING-H2 finger protein ATL60; EC=2.3.2.27 {ECO:0000305}; AltName: Full=RING-type E3 ubiquitin transferase ATL60 {ECO:0000305};	SubName: Full=Uncharacterized protein {ECO:0000313|EMBL:KZM89995.1};	FOG: Predicted E3 ubiquitin ligase	GO:0016021,integral component of membrane; GO:0046872,metal ion binding; GO:0061630,ubiquitin protein ligase activity; GO:0043161,proteasome-mediated ubiquitin-dependent protein catabolic process	Zinc-ribbon, C4HC2 type
Cluster-10658.142943	TRUE	TRUE	TRUE	K00688 glycogen phosphorylase [EC:2.4.1.1] | (RefSeq) glycogen phosphorylase 1-like (A)	hypothetical protein DCAR_007206 [Daucus carota subsp. sativus]	RecName: Full=ACT domain-containing protein ACR4 {ECO:0000305}; AltName: Full=Protein ACT DOMAIN REPEATS 4 {ECO:0000303|PubMed:12481063};	SubName: Full=Uncharacterized protein {ECO:0000313|EMBL:KZN06369.1};	--	GO:0009506,plasmodesma	ACT domain
Cluster-10658.133287	TRUE	TRUE	TRUE	--	PREDICTED: uncharacterized protein LOC108209805 [Daucus carota subsp. sativus]	--	SubName: Full=Uncharacterized protein {ECO:0000313|EMBL:KZM85834.1};	--	GO:0016021,integral component of membrane; GO:0008375,acetylglucosaminyltransferase activity	Core-2/I-Branching enzyme
Cluster-10658.75908	TRUE	TRUE	TRUE	K18045 tyrosine-protein phosphatase SIW14 [EC:3.1.3.48] | (RefSeq) probable tyrosine-protein phosphatase At1g05000 (A)	PREDICTED: probable tyrosine-protein phosphatase At1g05000 isoform X4 [Daucus carota subsp. sativus]	RecName: Full=Tyrosine-protein phosphatase DSP1 {ECO:0000305}; EC=3.1.3.48 {ECO:0000255|PROSITE-ProRule:PRU10044, ECO:0000269|PubMed:18433060, ECO:0000269|PubMed:21409566}; AltName: Full=Protein PLANT AND FUNGI ATYPICAL DUAL-SPECIFICITY PHOSPHATASE 1 {ECO:0000303|PubMed:21409566}; Short=AtPFA-DSP1 {ECO:0000303|PubMed:21409566}; AltName: Full=Tyrosine-protein phosphatase At1g05000 {ECO:0000305};	SubName: Full=Uncharacterized protein {ECO:0000313|EMBL:KZM96014.1};	Predicted protein tyrosine phosphatase	GO:0005737,cytoplasm; GO:0016791,phosphatase activity; GO:0004725,protein tyrosine phosphatase activity	Protein-tyrosine phosphatase
Cluster-10658.38545	TRUE	TRUE	TRUE	K20506 tuliposide A-converting enzyme [EC:4.2.99.22] | (RefSeq) tuliposide A-converting enzyme 2, chloroplastic-like (A)	PREDICTED: 2-hydroxyisoflavanone dehydratase-like [Daucus carota subsp. sativus]	RecName: Full=2-hydroxyisoflavanone dehydratase; EC=3.1.1.1; EC=4.2.1.105; AltName: Full=Carboxylesterase HIDM;	SubName: Full=Uncharacterized protein {ECO:0000313|EMBL:KZM90597.1};	Arylacetamide deacetylase	GO:0033987,2-hydroxyisoflavanone dehydratase activity; GO:0052689,carboxylic ester hydrolase activity; GO:0009813,flavonoid biosynthetic process; GO:0009717,isoflavonoid biosynthetic process; GO:0046287,isoflavonoid metabolic process	Chlorophyllase enzyme
Cluster-10658.107824	TRUE	TRUE	TRUE	K01537 Ca2+-transporting ATPase [EC:3.6.3.8] | (RefSeq) calcium-transporting ATPase 12, plasma membrane-type-like (A)	PREDICTED: calcium-transporting ATPase 12, plasma membrane-type-like [Daucus carota subsp. sativus]	RecName: Full=Calcium-transporting ATPase 12, plasma membrane-type; EC=3.6.3.8; AltName: Full=Ca(2+)-ATPase isoform 12;	RecName: Full=Calcium-transporting ATPase {ECO:0000256|RuleBase:RU361146}; EC=3.6.3.8 {ECO:0000256|RuleBase:RU361146};	Calcium transporting ATPase	GO:0005887,integral component of plasma membrane; GO:0043231,intracellular membrane-bounded organelle; GO:0005524,ATP binding; GO:0005388,calcium-transporting ATPase activity; GO:0005516,calmodulin binding; GO:0046872,metal ion binding	haloacid dehalogenase-like hydrolase
Cluster-10658.119179	TRUE	TRUE	TRUE	--	PREDICTED: probable inactive poly [ADP-ribose]	RecName: Full=Probable inactive poly [ADP-ribose] polymerase SRO2; AltName: Full=Protein SIMILAR TO RCD ONE 2;	SubName: Full=Uncharacterized protein {ECO:0000313|EMBL:KZM87318.1};	--	GO:0005634,nucleus; GO:0003950,NAD+ ADP-ribosyltransferase activity; GO:0007275,multicellular organism development	Poly(ADP-ribose) polymerase catalytic domain
Cluster-10658.98181	TRUE	TRUE	TRUE	K06617 raffinose synthase [EC:2.4.1.82] | (RefSeq) galactinol--sucrose galactosyltransferase (A)	PREDICTED: galactinol--sucrose galactosyltransferase [Daucus carota subsp. sativus]	RecName: Full=Probable galactinol--sucrose galactosyltransferase 5; EC=2.4.1.82; AltName: Full=Protein SEED IMBIBITION 1-LIKE; AltName: Full=Raffinose synthase 5;	SubName: Full=Uncharacterized protein {ECO:0000313|EMBL:KZN02493.1};	--	GO:0009507,chloroplast; GO:0047274,galactinol-sucrose galactosyltransferase activity; GO:0005975,carbohydrate metabolic process; GO:0009737,response to abscisic acid; GO:0006979,response to oxidative stress; GO:0009414,response to water deprivation	Raffinose synthase or seed imbibition protein Sip1
Cluster-10658.111668	TRUE	TRUE	TRUE	--	PREDICTED: pleiotropic drug resistance protein 1-like [Daucus carota subsp. sativus]	RecName: Full=Pleiotropic drug resistance protein 1; AltName: Full=NtPDR1;	SubName: Full=Pleiotropic drug resistance transporter 1 {ECO:0000313|EMBL:AGT28053.1};	Pleiotropic drug resistance proteins (PDR1-15), ABC superfamily	GO:0016021,integral component of membrane; GO:0005524,ATP binding; GO:0016887,ATPase activity	--
Cluster-10658.66725	TRUE	TRUE	TRUE	--	--	--	--	--	--	--
Cluster-10658.126985	TRUE	TRUE	TRUE	--	uncharacterized protein LOC111381351 [Olea europaea var. sylvestris]	--	SubName: Full=Uncharacterized protein {ECO:0000313|EMBL:PIN20453.1};	--	--	Protein of unknown function (DUF1645)
Cluster-10658.159109	TRUE	TRUE	TRUE	--	PREDICTED: uncharacterized protein LOC105112389 [Populus euphratica]	--	--	--	--	--
Cluster-10658.42832	TRUE	TRUE	TRUE	--	cotton fiber protein [Trema orientalis]	--	SubName: Full=Uncharacterized protein {ECO:0000313|EMBL:ONI27455.1};	--	--	Cotton fibre expressed protein
Cluster-10658.101096	TRUE	TRUE	TRUE	K23050 phenylcoumaran benzylic ether reductase [EC:1.3.1.-] | (RefSeq) isoflavone reductase homolog TP7-like (A)	hypothetical protein POPTR_0004s16400g [Populus trichocarpa]	RecName: Full=Isoflavone reductase-like protein; EC=1.3.1.-; AltName: Full=Pollen allergen Ole e 12.01; AltName: Allergen=Ole e 12.01;	SubName: Full=Uncharacterized protein {ECO:0000313|EMBL:ERP62306.1};	--	GO:0005737,cytoplasm; GO:0016491,oxidoreductase activity	--
Cluster-10658.123322	TRUE	TRUE	TRUE	--	hypothetical protein CFP56_26690 [Quercus suber]	--	SubName: Full=Uncharacterized protein {ECO:0000313|EMBL:OWM62819.1};	--	GO:0016021,integral component of membrane	Ycf1
Cluster-10658.100987	TRUE	TRUE	TRUE	K08912 light-harvesting complex II chlorophyll a/b binding protein 1 | (RefSeq) chlorophyll a-b binding protein, chloroplastic-like (A)	PREDICTED: chlorophyll a-b binding protein, chloroplastic-like [Daucus carota subsp. sativus]	RecName: Full=Chlorophyll a-b binding protein 3C, chloroplastic; AltName: Full=LHCII type I CAB-3C; Short=LHCP; Flags: Precursor;	RecName: Full=Chlorophyll a-b binding protein, chloroplastic {ECO:0000256|RuleBase:RU363080};	--	GO:0009941,chloroplast envelope; GO:0009535,chloroplast thylakoid membrane; GO:0016021,integral component of membrane; GO:0009522,photosystem I; GO:0009523,photosystem II; GO:0010287,plastoglobule; GO:0016168,chlorophyll binding; GO:0046872,metal ion binding; GO:0031409,pigment binding; GO:0009768,photosynthesis, light harvesting in photosystem I; GO:0018298,protein-chromophore linkage; GO:000941…	Chlorophyll A-B binding protein
Cluster-10658.80823	TRUE	TRUE	TRUE	--	hypothetical protein DCAR_026103 [Daucus carota subsp. sativus]	--	SubName: Full=Uncharacterized protein {ECO:0000313|EMBL:KZM89028.1};	Predicted hydrolase involved in interstrand cross-link repair	--	--
Cluster-10658.112572	TRUE	TRUE	TRUE	K02641 ferredoxin--NADP+ reductase [EC:1.18.1.2] | (RefSeq) ferredoxin--NADP reductase, root isozyme, chloroplastic (A)	PREDICTED: ferredoxin--NADP reductase, root isozyme, chloroplastic isoform X2 [Vigna angularis]	RecName: Full=Ferredoxin--NADP reductase, root isozyme, chloroplastic; Short=FNR; EC=1.18.1.2; Flags: Precursor;	RecName: Full=Ferredoxin--NADP reductase {ECO:0000256|RuleBase:RU004465}; EC=1.18.1.2 {ECO:0000256|RuleBase:RU004465};	NADP/FAD dependent oxidoreductase	GO:0009507,chloroplast; GO:0004324,ferredoxin-NADP+ reductase activity; GO:0015979,photosynthesis	Oxidoreductase NAD-binding domain
Cluster-10658.78726	TRUE	TRUE	TRUE	K00794 6,7-dimethyl-8-ribityllumazine synthase [EC:2.5.1.78] | (RefSeq) 6,7-dimethyl-8-ribityllumazine synthase, chloroplastic (A)	PREDICTED: 6,7-dimethyl-8-ribityllumazine synthase, chloroplastic [Daucus carota subsp. sativus]	RecName: Full=6,7-dimethyl-8-ribityllumazine synthase, chloroplastic; Short=DMRL synthase; Short=LS; Short=Lumazine synthase; EC=2.5.1.78; Flags: Precursor;	SubName: Full=Uncharacterized protein {ECO:0000313|EMBL:KZM85088.1};	6,7-dimethyl-8-ribityllumazine synthase	GO:0009507,chloroplast; GO:0009570,chloroplast stroma; GO:0009349,riboflavin synthase complex; GO:0000906,6,7-dimethyl-8-ribityllumazine synthase activity; GO:0016740,transferase activity; GO:0009231,riboflavin biosynthetic process	6,7-dimethyl-8-ribityllumazine synthase
Cluster-10658.91123	TRUE	TRUE	TRUE	K09286 EREBP-like factor | (RefSeq) ethylene-responsive transcription factor ERF010 (A)	hypothetical protein CCACVL1_20762 [Corchorus capsularis]	RecName: Full=Ethylene-responsive transcription factor ERF016;	SubName: Full=Uncharacterized protein {ECO:0000313|EMBL:OMO67151.1};	--	GO:0005634,nucleus; GO:0003677,DNA binding; GO:0003700,DNA-binding transcription factor activity; GO:0009873,ethylene-activated signaling pathway; GO:0006351,transcription, DNA-templated	AP2 domain
Cluster-10658.109296	TRUE	TRUE	TRUE	K04733 interleukin-1 receptor-associated kinase 4 [EC:2.7.11.1] | (RefSeq) putative receptor-like protein kinase At1g72540 (A)	PREDICTED: putative receptor-like protein kinase At1g72540 [Daucus carota subsp. sativus]	RecName: Full=Serine/threonine-protein kinase RIPK {ECO:0000305}; EC=2.7.11.1 {ECO:0000305|PubMed:21320696}; AltName: Full=ACIK1A/PBL14; AltName: Full=ACRE protein ortholog 264A {ECO:0000305}; Short=AtACRE264a {ECO:0000303|PubMed:15181213}; AltName: Full=PBS1-like protein 14 {ECO:0000303|PubMed:20413097}; AltName: Full=RPM1-induced protein kinase {ECO:0000303|PubMed:21320696};	SubName: Full=Serine/threonine-protein kinase {ECO:0000313|EMBL:EXB38959.1};	Serine/threonine protein kinase	GO:0005886,plasma membrane; GO:0005524,ATP binding; GO:0004674,protein serine/threonine kinase activity; GO:0004675,transmembrane receptor protein serine/threonine kinase activity; GO:0007166,cell surface receptor signaling pathway; GO:0042742,defense response to bacterium; GO:0006468,protein phosphorylation	Protein kinase domain
Cluster-10658.144659	TRUE	TRUE	TRUE	K07976 Rab family, other | (RefSeq) septum-promoting GTP-binding protein 1-like (A)	septum-promoting GTP-binding protein 1-like [Helianthus annuus]	RecName: Full=Ras-related protein RABF2a; Short=AtRABF2a; AltName: Full=Ras-related protein Rab5A; Short=AtRab5A; AltName: Full=Ras-related protein Rha1;	SubName: Full=Putative ras-related small GTP-binding family protein {ECO:0000313|EMBL:OTG26478.1};	Ras GTPases	GO:0030139,endocytic vesicle; GO:0005783,endoplasmic reticulum; GO:0005768,endosome; GO:0031902,late endosome membrane; GO:0005774,vacuolar membrane; GO:0005525,GTP binding; GO:0003924,GTPase activity; GO:0015031,protein transport; GO:0007034,vacuolar transport	ADP-ribosylation factor family
Cluster-10658.97092	TRUE	TRUE	TRUE	--	hypothetical protein DCAR_019189 [Daucus carota subsp. sativus]	--	SubName: Full=Uncharacterized protein {ECO:0000313|EMBL:KZM95947.1};	--	GO:0016021,integral component of membrane	--
Cluster-10658.93659	TRUE	TRUE	TRUE	K21989 calcium permeable stress-gated cation channel | (RefSeq) CSC1-like protein RXW8 (A)	PREDICTED: calmodulin-binding protein 60 D [Daucus carota subsp. sativus]	RecName: Full=Calmodulin-binding protein 60 D {ECO:0000303|PubMed:11782485};	SubName: Full=Uncharacterized protein {ECO:0000313|EMBL:KZM88193.1};	--	GO:0005634,nucleus; GO:0005516,calmodulin binding; GO:0003677,DNA binding; GO:0006355,regulation of transcription, DNA-templated; GO:0006950,response to stress; GO:0006351,transcription, DNA-templated	Calmodulin binding protein-like
Cluster-10658.96951	TRUE	TRUE	TRUE	--	PREDICTED: EID1-like F-box protein 3 [Vitis vinifera]	RecName: Full=EID1-like F-box protein 3;	SubName: Full=Uncharacterized protein {ECO:0000313|EMBL:CCB56823.1};	Predicted E3 ubiquitin ligase	GO:0005634,nucleus; GO:0009738,abscisic acid-activated signaling pathway; GO:0010029,regulation of seed germination; GO:0009737,response to abscisic acid; GO:0006970,response to osmotic stress; GO:0009651,response to salt stress; GO:0009414,response to water deprivation; GO:0010228,vegetative to reproductive phase transition of meristem	--
Cluster-10658.102686	TRUE	TRUE	TRUE	K16040 trans-resveratrol di-O-methyltransferase [EC:2.1.1.240] | (RefSeq) trans-resveratrol di-O-methyltransferase (A)	PREDICTED: trans-resveratrol di-O-methyltransferase-like isoform X3 [Ipomoea nil]	RecName: Full=Probable O-methyltransferase 3 {ECO:0000303|PubMed:18223037}; Short=HlOMT3 {ECO:0000303|PubMed:18223037}; EC=2.1.1.- {ECO:0000305};	SubName: Full=Flavonoid o-methyltransferase related {ECO:0000313|EMBL:EOY28136.1};	--	GO:0008171,O-methyltransferase activity; GO:0046983,protein dimerization activity	--
Cluster-10658.72056	TRUE	TRUE	TRUE	K15718 linoleate 9S-lipoxygenase [EC:1.13.11.58] | (RefSeq) probable linoleate 9S-lipoxygenase 5 (A)	hypothetical protein DCAR_029403 [Daucus carota subsp. sativus]	RecName: Full=Probable linoleate 9S-lipoxygenase 5; EC=1.13.11.58; AltName: Full=Leaf lipoxygenase;	RecName: Full=Lipoxygenase {ECO:0000256|RuleBase:RU003975}; EC=1.13.11.- {ECO:0000256|RuleBase:RU003975};	--	GO:0005737,cytoplasm; GO:0046872,metal ion binding; GO:0016702,oxidoreductase activity, acting on single donors with incorporation of molecular oxygen, incorporation of two atoms of oxygen; GO:0031408,oxylipin biosynthetic process	Lipoxygenase
Cluster-10658.124880	TRUE	TRUE	TRUE	--	--	--	--	--	--	--
Cluster-10658.124590	TRUE	TRUE	TRUE	K00031 isocitrate dehydrogenase [EC:1.1.1.42] | (RefSeq) isocitrate dehydrogenase [NADP]-like (A)	Isocitrate/isopropylmalate dehydrogenase family protein isoform 2, partial [Theobroma cacao]	RecName: Full=Isocitrate dehydrogenase [NADP], chloroplastic/mitochondrial; EC=1.1.1.42; Flags: Precursor;	RecName: Full=Isocitrate dehydrogenase [NADP] {ECO:0000256|PIRNR:PIRNR000108}; EC=1.1.1.42 {ECO:0000256|PIRNR:PIRNR000108};	NADP-dependent isocitrate dehydrogenase	GO:0009507,chloroplast; GO:0009570,chloroplast stroma; GO:0009534,chloroplast thylakoid; GO:0005739,mitochondrion; GO:0004450,isocitrate dehydrogenase (NADP+) activity; GO:0000287,magnesium ion binding; GO:0051287,NAD binding; GO:0006102,isocitrate metabolic process; GO:0006099,tricarboxylic acid cycle	Isocitrate/isopropylmalate dehydrogenase
Cluster-10658.119438	TRUE	TRUE	TRUE	K05658 ATP-binding cassette, subfamily B (MDR/TAP), member 1 [EC:7.6.2.2] | (RefSeq) uncharacterized protein LOC111781709 (A)	PREDICTED: protein DMR6-LIKE OXYGENASE 2 [Daucus carota subsp. sativus]	RecName: Full=Flavanone 3-dioxygenase 3 {ECO:0000305}; EC=1.14.11.9 {ECO:0000269|PubMed:18413994}; AltName: Full=Flavanone 3-beta-hydroxylase 3 {ECO:0000305}; AltName: Full=Flavanone 3-hydroxylase 3 {ECO:0000303|PubMed:18413994}; Short=OsF3H-3 {ECO:0000303|PubMed:18413994}; AltName: Full=Flavonoid 3-hydroxylase {ECO:0000303|PubMed:18726614}; Short=OsF3H {ECO:0000303|PubMed:18726614};	SubName: Full=Oxoglutarate/iron-dependent dioxygenase {ECO:0000313|EMBL:OVA17921.1};	Iron/ascorbate family oxidoreductases	GO:0031418,L-ascorbic acid binding; GO:0046872,metal ion binding; GO:0045486,naringenin 3-dioxygenase activity; GO:0009813,flavonoid biosynthetic process	2OG-Fe(II) oxygenase superfamily
Cluster-10658.160797	TRUE	TRUE	TRUE	K14493 gibberellin receptor GID1 [EC:3.-.-.-] | (RefSeq) hypothetical protein (A)	PREDICTED: probable carboxylesterase 17 [Vitis vinifera]	RecName: Full=Probable carboxylesterase 17; AltName: Full=AtCXE17; EC=3.1.1.1;	SubName: Full=Uncharacterized protein {ECO:0000313|EMBL:CCB57728.1};	Arylacetamide deacetylase	GO:0052689,carboxylic ester hydrolase activity; GO:0016787,hydrolase activity; GO:0009056,catabolic process	Dienelactone hydrolase family
Cluster-10658.97058	TRUE	TRUE	TRUE	--	PREDICTED: uncharacterized protein LOC108216787 [Daucus carota subsp. sativus]	--	SubName: Full=Uncharacterized protein {ECO:0000313|EMBL:KZM99849.1};	--	GO:0016021,integral component of membrane	--
Cluster-10658.183663	TRUE	TRUE	TRUE	K10260 F-box and WD-40 domain protein 7 | (RefSeq) DENN domain and WD repeat-containing protein SCD1-like (A)	PREDICTED: DENN domain and WD repeat-containing protein SCD1 isoform X1 [Daucus carota subsp. sativus]	RecName: Full=DENN domain and WD repeat-containing protein SCD1 {ECO:0000305}; AltName: Full=Protein STOMATAL CYTOKINESIS DEFECTIVE 1 {ECO:0000303|PubMed:12874123};	SubName: Full=Uncharacterized protein {ECO:0000313|EMBL:KZM84761.1};	Calmodulin-binding protein CRAG, contains DENN domain	GO:0030136,clathrin-coated vesicle; GO:0080008,Cul4-RING E3 ubiquitin ligase complex; GO:0005886,plasma membrane; GO:0000911,cytokinesis by cell plate formation; GO:0010235,guard mother cell cytokinesis; GO:0009825,multidimensional cell growth; GO:0045824,negative regulation of innate immune response; GO:0040008,regulation of growth	Nup133 N terminal like
Cluster-10658.126024	TRUE	TRUE	TRUE	--	--	--	--	--	--	--
Cluster-10658.22336	TRUE	TRUE	TRUE	K10999 cellulose synthase A [EC:2.4.1.12] | (Kazusa) Lj5g3v1119490.1; - (A)	PREDICTED: cellulose synthase-like protein G3 [Vitis vinifera]	RecName: Full=Cellulose synthase-like protein G3; Short=AtCslG3; EC=2.4.1.-;	SubName: Full=Uncharacterized protein {ECO:0000313|EMBL:CCB58268.1};	--	GO:0005794,Golgi apparatus; GO:0000139,Golgi membrane; GO:0016021,integral component of membrane; GO:0005886,plasma membrane; GO:0016760,cellulose synthase (UDP-forming) activity; GO:0016759,cellulose synthase activity; GO:0071555,cell wall organization; GO:0030244,cellulose biosynthetic process; GO:0009833,plant-type primary cell wall biogenesis	Cellulose synthase
Cluster-10658.77334	TRUE	TRUE	TRUE	--	--	--	--	--	--	--
Cluster-10658.66607	TRUE	TRUE	TRUE	K20714 serine/threonine-protein kinase OXI1 [EC:2.7.11.1] | (RefSeq) serine/threonine-protein kinase OXI1-like (A)	PREDICTED: serine/threonine-protein kinase OXI1-like [Ipomoea nil]	RecName: Full=Serine/threonine-protein kinase OXI1; EC=2.7.11.1; AltName: Full=AGC serine/threonine-protein kinase subfamily 2 member 1 {ECO:0000303|PubMed:13678909}; AltName: Full=Protein OXIDATIVE SIGNAL-INDUCIBLE 1 {ECO:0000303|PubMed:14985766};	SubName: Full=serine/threonine-protein kinase OXI1-like {ECO:0000313|RefSeq:XP_016433698.1};	Putative serine/threonine protein kinase	GO:0005737,cytoplasm; GO:0005634,nucleus; GO:0005886,plasma membrane; GO:0005524,ATP binding; GO:0016301,kinase activity; GO:0004672,protein kinase activity; GO:0019901,protein kinase binding; GO:0004674,protein serine/threonine kinase activity; GO:0006952,defense response; GO:0035556,intracellular signal transduction; GO:0006468,protein phosphorylation; GO:0006979,response to oxidative stress; G…	Phosphotransferase enzyme family
Cluster-10658.79950	TRUE	TRUE	TRUE	K05909 laccase [EC:1.10.3.2] | (RefSeq) laccase-14-like (A)	PREDICTED: laccase-14-like [Daucus carota subsp. sativus]	RecName: Full=Laccase-15; EC=1.10.3.2; AltName: Full=Benzenediol:oxygen oxidoreductase 15; AltName: Full=Diphenol oxidase 15; AltName: Full=Protein TRANSPARENT TESTA 10; AltName: Full=Urishiol oxidase 15; Flags: Precursor;	RecName: Full=Laccase {ECO:0000256|RuleBase:RU361119}; EC=1.10.3.2 {ECO:0000256|RuleBase:RU361119}; AltName: Full=Benzenediol:oxygen oxidoreductase {ECO:0000256|RuleBase:RU361119}; AltName: Full=Diphenol oxidase {ECO:0000256|RuleBase:RU361119}; AltName: Full=Urishiol oxidase {ECO:0000256|RuleBase:RU361119};	Multicopper oxidases	GO:0048046,apoplast; GO:0005507,copper ion binding; GO:0052716,hydroquinone:oxygen oxidoreductase activity; GO:0016722,oxidoreductase activity, oxidizing metal ions; GO:0009809,lignin biosynthetic process; GO:0046274,lignin catabolic process; GO:0010023,proanthocyanidin biosynthetic process; GO:0046688,response to copper ion	Multicopper oxidase
Cluster-10658.79443	TRUE	TRUE	TRUE	K12472 epidermal growth factor receptor substrate 15 | (RefSeq) epidermal growth factor receptor substrate 15-like 1 (A)	PREDICTED: epidermal growth factor receptor substrate 15-like 1 isoform X3 [Daucus carota subsp. sativus]	RecName: Full=EH domain-containing protein 2 {ECO:0000303|PubMed:18547399}; Short=AtEHD2 {ECO:0000303|PubMed:18547399}; EC=3.6.5.2 {ECO:0000255|PROSITE-ProRule:PRU00758};	SubName: Full=Uncharacterized protein {ECO:0000313|EMBL:KZM98709.1};	Synaptic vesicle protein EHS-1 and related EH domain proteins	GO:0005737,cytoplasm; GO:0010008,endosome membrane; GO:0043231,intracellular membrane-bounded organelle; GO:0016020,membrane; GO:0005634,nucleus; GO:0005886,plasma membrane; GO:0009506,plasmodesma; GO:0005509,calcium ion binding; GO:0005525,GTP binding; GO:0016787,hydrolase activity; GO:0006897,endocytosis; GO:0051260,protein homooligomerization; GO:0032956,regulation of actin cytoskeleton organi…	EF-hand domain pair
Cluster-10658.59699	TRUE	TRUE	TRUE	K15631 molybdenum cofactor sulfurtransferase [EC:2.8.1.9] | (RefSeq) uncharacterized protein LOC108205863 (A)	PREDICTED: uncharacterized protein LOC108212187 [Daucus carota subsp. sativus]	RecName: Full=Molybdenum cofactor sulfurase {ECO:0000255|HAMAP-Rule:MF_03050}; Short=MCS {ECO:0000255|HAMAP-Rule:MF_03050}; Short=MOS {ECO:0000255|HAMAP-Rule:MF_03050}; Short=MoCo sulfurase {ECO:0000255|HAMAP-Rule:MF_03050}; EC=2.8.1.9 {ECO:0000255|HAMAP-Rule:MF_03050, ECO:0000269|PubMed:11553608, ECO:0000269|PubMed:15561708}; AltName: Full=Abscisic acid protein 3; AltName: Full=Low expression of…	SubName: Full=Uncharacterized protein {ECO:0000313|EMBL:KZN08386.1};	Molybdenum cofactor sulfurase	GO:0005622,intracellular; GO:0008265,Mo-molybdopterin cofactor sulfurase activity; GO:0102867,molybdenum cofactor sulfurtransferase activity; GO:0030151,molybdenum ion binding; GO:0030170,pyridoxal phosphate binding; GO:0009000,selenocysteine lyase activity; GO:0009688,abscisic acid biosynthetic process; GO:0009734,auxin-activated signaling pathway; GO:0042742,defense response to bacterium; GO:00…	--
Cluster-10658.71815	TRUE	TRUE	TRUE	K04733 interleukin-1 receptor-associated kinase 4 [EC:2.7.11.1] | (RefSeq) G-type lectin S-receptor-like serine/threonine-protein kinase At4g27290 (A)	PREDICTED: G-type lectin S-receptor-like serine/threonine-protein kinase At4g27290 [Daucus carota subsp. sativus]	RecName: Full=G-type lectin S-receptor-like serine/threonine-protein kinase At4g27290; EC=2.7.11.1; Flags: Precursor;	SubName: Full=S-locus protein kinase {ECO:0000313|EMBL:ERP66940.1};	--	GO:0005886,plasma membrane; GO:0005524,ATP binding; GO:0005516,calmodulin binding; GO:0030246,carbohydrate binding; GO:0004674,protein serine/threonine kinase activity; GO:0006468,protein phosphorylation; GO:0048544,recognition of pollen	Immune evasion protein
Cluster-10658.118015	TRUE	TRUE	TRUE	K14497 protein phosphatase 2C [EC:3.1.3.16] | (RefSeq) protein phosphatase 2C 77 (A)	protein phosphatase 2C [Camellia sinensis]	RecName: Full=Protein phosphatase 2C 16; Short=AtPP2C16; EC=3.1.3.16; AltName: Full=AtP2C-HA; AltName: Full=Protein HYPERSENSITIVE TO ABA 1; AltName: Full=Protein phosphatase 2C HAB1; Short=PP2C HAB1; Flags: Precursor;	SubName: Full=Protein phosphatase 2C {ECO:0000313|EMBL:AUD40396.1};	Serine/threonine protein phosphatase	GO:0005737,cytoplasm; GO:0005634,nucleus; GO:0046872,metal ion binding; GO:0004722,protein serine/threonine phosphatase activity; GO:0009738,abscisic acid-activated signaling pathway	Protein phosphatase 2C
Cluster-10658.103694	TRUE	TRUE	TRUE	K00012 UDPglucose 6-dehydrogenase [EC:1.1.1.22] | (RefSeq) UDP-glucose 6-dehydrogenase 1 (A)	PREDICTED: UDP-glucose 6-dehydrogenase 1 [Daucus carota subsp. sativus]	RecName: Full=UDP-glucose 6-dehydrogenase 5; Short=UDP-Glc dehydrogenase 5; Short=UDP-GlcDH 5; Short=UDPGDH 5; EC=1.1.1.22; AltName: Full=Os-UGD5;	RecName: Full=UDP-glucose 6-dehydrogenase {ECO:0000256|PIRNR:PIRNR000124}; EC=1.1.1.22 {ECO:0000256|PIRNR:PIRNR000124};	UDP-glucose/GDP-mannose dehydrogenase	GO:0005829,cytosol; GO:0005634,nucleus; GO:0051287,NAD binding; GO:0003979,UDP-glucose 6-dehydrogenase activity; GO:0006024,glycosaminoglycan biosynthetic process; GO:0006065,UDP-glucuronate biosynthetic process	UDP-glucose/GDP-mannose dehydrogenase family, central domain
Cluster-10658.106035	TRUE	TRUE	TRUE	K17356 tetraspanin-13/31 | (RefSeq) tetraspanin-8-like (A)	PREDICTED: tetraspanin-8-like [Daucus carota subsp. sativus]	RecName: Full=Tetraspanin-8;	SubName: Full=Uncharacterized protein {ECO:0000313|EMBL:KZM94696.1};	--	GO:0005794,Golgi apparatus; GO:0016021,integral component of membrane; GO:0016020,membrane; GO:0005886,plasma membrane; GO:0009506,plasmodesma; GO:0050829,defense response to Gram-negative bacterium	Bacterial membrane protein YfhO
Cluster-10658.106593	TRUE	TRUE	TRUE	K05715 2-phosphoglycerate kinase [EC:2.7.2.-] | (RefSeq) P-loop NTPase domain-containing protein LPA1 homolog 2-like (A)	hypothetical protein DCAR_018789 [Daucus carota subsp. sativus]	RecName: Full=P-loop NTPase domain-containing protein LPA1 homolog 2 {ECO:0000305}; AltName: Full=Protein LOW PHYTIC ACID 1 homolog 2 {ECO:0000305};	SubName: Full=Uncharacterized protein {ECO:0000313|EMBL:KZM95547.1};	--	--	--
Cluster-10658.106070	TRUE	TRUE	TRUE	K23260 scopoletin glucosyltransferase [EC:2.4.1.128] | (RefSeq) scopoletin glucosyltransferase-like (A)	UGTPg44 [Panax ginseng]	RecName: Full=Scopoletin glucosyltransferase; EC=2.4.1.128; AltName: Full=Phenylpropanoid:glucosyltransferase 1;	RecName: Full=Glycosyltransferase {ECO:0000256|RuleBase:RU362057}; EC=2.4.1.- {ECO:0000256|RuleBase:RU362057};	UDP-glucuronosyl and UDP-glucosyl transferase	GO:0042802,identical protein binding; GO:0050275,scopoletin glucosyltransferase activity; GO:0008152,metabolic process	UDP-glucoronosyl and UDP-glucosyl transferase
Cluster-10658.88748	TRUE	TRUE	TRUE	K18693 diacylglycerol diphosphate phosphatase / phosphatidate phosphatase [EC:3.1.3.81 3.1.3.4] | (RefSeq) lipid phosphate phosphatase 1-like isoform X1 (A)	PREDICTED: lipid phosphate phosphatase 2-like isoform X2 [Daucus carota subsp. sativus]	RecName: Full=Lipid phosphate phosphatase 1; Short=AtLPP1; EC=3.1.3.-; AltName: Full=Phosphatidic acid phosphatase 1; Short=AtPAP1; AltName: Full=Prenyl diphosphate phosphatase;	SubName: Full=Putative lipid phosphate phosphatase 3 {ECO:0000313|EMBL:EXB89365.1};	Lipid phosphate phosphatase and related enzymes of the PAP2 family	GO:0005887,integral component of plasma membrane; GO:0005886,plasma membrane; GO:0008195,phosphatidate phosphatase activity; GO:0009626,plant-type hypersensitive response; GO:0010224,response to UV-B	PAP2 superfamily
Cluster-10658.167203	TRUE	TRUE	TRUE	K00218 protochlorophyllide reductase [EC:1.3.1.33] | (RefSeq) protochlorophyllide reductase, chloroplastic (A)	PREDICTED: protochlorophyllide reductase, chloroplastic [Daucus carota subsp. sativus]	RecName: Full=Protochlorophyllide reductase, chloroplastic; Short=PCR; EC=1.3.1.33; AltName: Full=NADPH-protochlorophyllide oxidoreductase; Short=POR; Flags: Precursor;	RecName: Full=NADPH-protochlorophyllide oxidoreductase {ECO:0000256|RuleBase:RU365001}; EC=1.3.1.33 {ECO:0000256|RuleBase:RU365001};	Dehydrogenases with different specificities (related to short-chain alcohol dehydrogenases)	GO:0009507,chloroplast; GO:0016630,protochlorophyllide reductase activity; GO:0015995,chlorophyll biosynthetic process; GO:0015979,photosynthesis	--
Cluster-10658.97405	TRUE	TRUE	TRUE	--	--	--	--	--	--	--
Cluster-10658.124100	TRUE	TRUE	TRUE	K19613 leucine-rich repeat protein SHOC2 | (RefSeq) uncharacterized protein LOC111313103 isoform X1 (A)	PREDICTED: probable WRKY transcription factor 53 [Daucus carota subsp. sativus]	RecName: Full=Probable WRKY transcription factor 53; AltName: Full=WRKY DNA-binding protein 53;	SubName: Full=Uncharacterized protein {ECO:0000313|EMBL:KZN01870.1};	--	GO:0009507,chloroplast; GO:0005634,nucleus; GO:0003677,DNA binding; GO:0003700,DNA-binding transcription factor activity; GO:0043565,sequence-specific DNA binding; GO:0009816,defense response to bacterium, incompatible interaction; GO:0010150,leaf senescence; GO:0045893,positive regulation of transcription, DNA-templated; GO:0031347,regulation of defense response; GO:0010200,response to chitin; G…	WRKY DNA -binding domain
Cluster-10658.65727	TRUE	TRUE	TRUE	K09286 EREBP-like factor | (RefSeq) ethylene-responsive transcription factor ERF054 (A)	AP2/ERF domain-containing transcription factor, putative [Theobroma cacao]	RecName: Full=Ethylene-responsive transcription factor ERF053 {ECO:0000305}; Short=AtERF53 {ECO:0000303|PubMed:22095047};	SubName: Full=AP2/ERF domain-containing transcription factor, putative {ECO:0000313|EMBL:EOX99382.1};	--	GO:0005737,cytoplasm; GO:0005634,nucleus; GO:0003700,DNA-binding transcription factor activity; GO:0043565,sequence-specific DNA binding; GO:0009873,ethylene-activated signaling pathway; GO:1900036,positive regulation of cellular response to heat; GO:0045893,positive regulation of transcription, DNA-templated; GO:2000070,regulation of response to water deprivation; GO:0009651,response to salt str…	AP2 domain
Cluster-10658.126942	TRUE	TRUE	TRUE	K12349 neutral ceramidase [EC:3.5.1.23] | (RefSeq) neutral ceramidase-like (A)	Ty3/gypsy retrotransposon protein [Trifolium pratense]	RecName: Full=Uncharacterized mitochondrial protein AtMg00860; AltName: Full=ORF158;	SubName: Full=Polyprotein {ECO:0000313|EMBL:AAO23078.1};	FOG: Transposon-encoded proteins with TYA, reverse transcriptase, integrase domains in various combinations	GO:0005739,mitochondrion	Integrase zinc binding domain
Cluster-10658.88714	TRUE	TRUE	TRUE	--	--	--	--	--	--	--
Cluster-10658.143291	TRUE	TRUE	TRUE	K08511 vesicle-associated membrane protein 72 | (RefSeq) vesicle-associated membrane protein 724 (A)	PREDICTED: vesicle-associated membrane protein 724 [Capsicum annuum]	RecName: Full=Vesicle-associated membrane protein 724 {ECO:0000303|PubMed:11115874}; Short=AtVAMP724 {ECO:0000303|PubMed:11115874}; AltName: Full=SYBL1-like protein {ECO:0000303|PubMed:9461215};	SubName: Full=Vesicle-associated membrane protein {ECO:0000313|EMBL:PHT59929.1};	Synaptobrevin/VAMP-like protein	GO:0031901,early endosome membrane; GO:0016021,integral component of membrane; GO:0005886,plasma membrane; GO:0031201,SNARE complex; GO:0005484,SNAP receptor activity; GO:0000149,SNARE binding; GO:0006887,exocytosis; GO:0015031,protein transport; GO:0006906,vesicle fusion	Regulated-SNARE-like domain
Cluster-10658.105901	TRUE	TRUE	TRUE	K10396 kinesin family member 5 | (RefSeq) hypothetical protein (A)	PREDICTED: GDSL esterase/lipase At1g54790 [Daucus carota subsp. sativus]	RecName: Full=GDSL esterase/lipase At1g54790; EC=3.1.1.-; AltName: Full=Extracellular lipase At1g54790; Flags: Precursor;	SubName: Full=GDSL esterase/lipase At1g54790-like {ECO:0000313|RefSeq:XP_010278961.1};	--	GO:0005576,extracellular region; GO:0016788,hydrolase activity, acting on ester bonds; GO:0016042,lipid catabolic process	GDSL-like Lipase/Acylhydrolase
Cluster-10658.54183	TRUE	TRUE	TRUE	K02638 plastocyanin | (RefSeq) plastocyanin B'/B'' (A)	PREDICTED: plastocyanin B'/B'' [Ricinus communis]	RecName: Full=Plastocyanin, chloroplastic; Flags: Precursor;	RecName: Full=Plastocyanin {ECO:0000256|RuleBase:RU363020};	--	GO:0009535,chloroplast thylakoid membrane; GO:0005507,copper ion binding; GO:0009055,electron transfer activity	Cupredoxin-like domain
Cluster-10658.99882	TRUE	TRUE	TRUE	--	hypothetical protein DCAR_026103 [Daucus carota subsp. sativus]	--	SubName: Full=Uncharacterized protein {ECO:0000313|EMBL:KZM89028.1};	Predicted hydrolase involved in interstrand cross-link repair	--	--
Cluster-10658.121940	TRUE	TRUE	TRUE	--	--	--	--	--	--	--
Cluster-10658.47853	TRUE	TRUE	TRUE	K01870 isoleucyl-tRNA synthetase [EC:6.1.1.5] | (RefSeq) hypothetical protein (A)	PREDICTED: transcription repressor OFP7 [Juglans regia]	RecName: Full=Transcription repressor OFP7; AltName: Full=Ovate family protein 7; Short=AtOFP7;	SubName: Full=transcription repressor OFP7 {ECO:0000313|RefSeq:XP_018826453.1};	--	GO:0005634,nucleus; GO:0005886,plasma membrane; GO:0045892,negative regulation of transcription, DNA-templated; GO:0006351,transcription, DNA-templated	Transcriptional repressor, ovate
Cluster-10658.96665	TRUE	TRUE	TRUE	K03063 26S proteasome regulatory subunit T3 | (RefSeq) 26S protease regulatory subunit 6B homolog (A)	PREDICTED: BTB/POZ domain-containing protein At5g48130 [Juglans regia]	RecName: Full=BTB/POZ domain-containing protein At5g48130;	SubName: Full=BTB/POZ domain-containing protein At5g48130 {ECO:0000313|RefSeq:XP_018849902.1};	--	GO:0016567,protein ubiquitination	BTB/POZ domain
Cluster-10658.111744	TRUE	TRUE	TRUE	K15718 linoleate 9S-lipoxygenase [EC:1.13.11.58] | (RefSeq) LOX, LOX1.4, LOX1.6, POTLX-2, StLOX1, lox1:St:3; linoleate 9S-lipoxygenase 6-like (A)	hypothetical protein DCAR_029403 [Daucus carota subsp. sativus]	RecName: Full=Linoleate 9S-lipoxygenase 6; EC=1.13.11.58; AltName: Full=Lipoxygenase 1-5; Short=StLOX1; Short=lox1:St:3; Flags: Fragment;	SubName: Full=Lipoxygenase {ECO:0000313|EMBL:ACG56281.1}; EC=1.13.11.12 {ECO:0000313|EMBL:ACG56281.1};	--	GO:0005737,cytoplasm; GO:0046872,metal ion binding; GO:0016702,oxidoreductase activity, acting on single donors with incorporation of molecular oxygen, incorporation of two atoms of oxygen; GO:0031408,oxylipin biosynthetic process	Lipoxygenase
Cluster-10658.116261	TRUE	TRUE	TRUE	K00901 diacylglycerol kinase (ATP) [EC:2.7.1.107] | (RefSeq) diacylglycerol kinase 5 isoform X1 (A)	isoform 2 of diacylglycerol kinase 5 [Quercus suber]	RecName: Full=Diacylglycerol kinase 5; Short=AtDGK5; Short=DAG kinase 5; EC=2.7.1.107; AltName: Full=Diglyceride kinase 5; Short=DGK 5;	RecName: Full=Diacylglycerol kinase {ECO:0000256|RuleBase:RU361128}; Short=DAG kinase {ECO:0000256|RuleBase:RU361128}; EC=2.7.1.107 {ECO:0000256|RuleBase:RU361128};	Diacylglycerol kinase	GO:0005524,ATP binding; GO:0004143,diacylglycerol kinase activity; GO:0003951,NAD+ kinase activity; GO:0006952,defense response; GO:0007205,protein kinase C-activating G protein-coupled receptor signaling pathway	Diacylglycerol kinase accessory domain
Cluster-10658.35109	TRUE	TRUE	TRUE	K03111 single-strand DNA-binding protein | (RefSeq) single-stranded DNA-binding protein, mitochondrial (A)	PREDICTED: single-stranded DNA-binding protein, mitochondrial [Nicotiana tomentosiformis]	RecName: Full=Single-stranded DNA-binding protein, mitochondrial; Flags: Precursor;	SubName: Full=single-stranded DNA-binding protein, mitochondrial-like {ECO:0000313|RefSeq:XP_016464436.1};	Single-stranded DNA-binding protein	GO:0005739,mitochondrion; GO:0003697,single-stranded DNA binding	Single-strand binding protein family
Cluster-10658.121536	TRUE	TRUE	TRUE	--	NAC domain-containing protein 92-like [Hevea brasiliensis]	RecName: Full=NAC domain-containing protein 46 {ECO:0000303|PubMed:15029955}; Short=ANAC046 {ECO:0000303|PubMed:15029955};	SubName: Full=NAC transcription factors 15 {ECO:0000313|EMBL:ALC78992.1};	--	GO:0005634,nucleus; GO:0003677,DNA binding; GO:0003700,DNA-binding transcription factor activity; GO:1903648,positive regulation of chlorophyll catabolic process; GO:1900057,positive regulation of leaf senescence; GO:0006351,transcription, DNA-templated	--
Cluster-10658.125414	TRUE	TRUE	TRUE	--	hypothetical protein CFP56_72907 [Quercus suber]	RecName: Full=Hydrophobic protein RCI2B; AltName: Full=Low temperature and salt-responsive protein LTI6B;	SubName: Full=Putative ovule protein {ECO:0000313|EMBL:JAP11545.1};	Stress responsive protein	GO:0016021,integral component of membrane; GO:0009737,response to abscisic acid; GO:0009409,response to cold; GO:0009651,response to salt stress; GO:0009414,response to water deprivation	--
Cluster-10658.72938	TRUE	TRUE	TRUE	K08917 light-harvesting complex II chlorophyll a/b binding protein 6 | (RefSeq) chlorophyll a-b binding protein CP24 10A, chloroplastic (A)	PREDICTED: chlorophyll a-b binding protein CP24 10A, chloroplastic [Vigna angularis]	RecName: Full=Chlorophyll a-b binding protein CP24 10A, chloroplastic; Short=CAB-10A; Short=LHCP; Flags: Precursor;	RecName: Full=Chlorophyll a-b binding protein, chloroplastic {ECO:0000256|RuleBase:RU363080};	--	GO:0009941,chloroplast envelope; GO:0009535,chloroplast thylakoid membrane; GO:0016021,integral component of membrane; GO:0009523,photosystem II; GO:0010287,plastoglobule; GO:0016168,chlorophyll binding; GO:0031409,pigment binding; GO:0009768,photosynthesis, light harvesting in photosystem I; GO:0018298,protein-chromophore linkage; GO:0009416,response to light stimulus	Chlorophyll A-B binding protein
Cluster-10658.71276	TRUE	TRUE	TRUE	K13414 mitogen-activated protein kinase kinase kinase 1 [EC:2.7.11.25] | (RefSeq) serine/threonine-protein kinase pakG-like (A)	toll/interleukin 1 receptor domain containing protein, partial [(Populus tomentosa x Populus bolleana) x Populus tomentosa]	RecName: Full=TMV resistance protein N;	SubName: Full=Toll/interleukin 1 receptor domain containing protein {ECO:0000313|EMBL:ABO20868.1}; Flags: Fragment;	--	GO:0005737,cytoplasm; GO:0043531,ADP binding; GO:0005524,ATP binding; GO:0009626,plant-type hypersensitive response; GO:0007165,signal transduction	MTH538 TIR-like domain (DUF1863)
Cluster-10658.132584	TRUE	TRUE	TRUE	K11153 retinol dehydrogenase 12 [EC:1.1.1.300] | (RefSeq) short-chain dehydrogenase TIC 32, chloroplastic-like (A)	PREDICTED: short-chain dehydrogenase TIC 32, chloroplastic-like [Daucus carota subsp. sativus]	--	SubName: Full=Uncharacterized protein {ECO:0000313|EMBL:KZN11969.1};	--	--	--
Cluster-10658.112497	TRUE	TRUE	TRUE	--	PREDICTED: glycosyltransferase family protein 64 protein C5 [Vitis vinifera]	RecName: Full=Glycosyltransferase family protein 64 protein C5 {ECO:0000303|PubMed:24905498}; Short=GT64 C5 {ECO:0000303|PubMed:24905498}; EC=2.4.1.- {ECO:0000305};	SubName: Full=Uncharacterized protein {ECO:0000313|EMBL:CBI40190.3};	Acetylglucosaminyltransferase EXT2/exostosin 2	GO:0016021,integral component of membrane; GO:0046872,metal ion binding; GO:0016757,transferase activity, transferring glycosyl groups; GO:0006486,protein glycosylation	--
Cluster-10658.94042	TRUE	TRUE	TRUE	K08915 light-harvesting complex II chlorophyll a/b binding protein 4 | (RefSeq) chlorophyll a-b binding protein CP29.1, chloroplastic-like (A)	PREDICTED: chlorophyll a-b binding protein CP29.1, chloroplastic-like [Nicotiana sylvestris]	RecName: Full=Chlorophyll a-b binding protein CP29.2, chloroplastic; AltName: Full=LHCB4.2; AltName: Full=LHCII protein 4.2; Flags: Precursor;	RecName: Full=Chlorophyll a-b binding protein, chloroplastic {ECO:0000256|RuleBase:RU363080};	--	GO:0009507,chloroplast; GO:0009941,chloroplast envelope; GO:0009534,chloroplast thylakoid; GO:0009535,chloroplast thylakoid membrane; GO:0016021,integral component of membrane; GO:0016020,membrane; GO:0009522,photosystem I; GO:0009523,photosystem II; GO:0010287,plastoglobule; GO:0009579,thylakoid; GO:0016168,chlorophyll binding; GO:0046872,metal ion binding; GO:0031409,pigment binding; GO:0009768…	Chlorophyll A-B binding protein
Cluster-10658.102935	TRUE	TRUE	TRUE	K10256 omega-6 fatty acid desaturase / acyl-lipid omega-6 desaturase (Delta-12 desaturase) [EC:1.14.19.6 1.14.19.22] | (RefSeq) delta(12)-fatty-acid desaturase FAD2-like (A)	PREDICTED: delta(12)-fatty-acid desaturase FAD2-like [Daucus carota subsp. sativus]	RecName: Full=Delta(12)-fatty-acid desaturase FAD2 {ECO:0000303|PubMed:12481086}; EC=1.14.19.6 {ECO:0000269|PubMed:12481086};	SubName: Full=Uncharacterized protein {ECO:0000313|EMBL:KZM99090.1};	--	GO:0005789,endoplasmic reticulum membrane; GO:0016021,integral component of membrane; GO:0102985,Delta12-fatty-acid desaturase activity; GO:0006636,unsaturated fatty acid biosynthetic process	Fatty acid desaturase
Cluster-10658.117033	TRUE	TRUE	TRUE	K09574 FK506-binding protein 8 [EC:5.2.1.8] | (RefSeq) peptidyl-prolyl cis-trans isomerase FKBP42 (A)	outer envelope protein 61 isoform X1 [Jatropha curcas]	RecName: Full=Outer envelope protein 61; AltName: Full=Tetratricopeptide repeat domain-containing protein 7;	SubName: Full=Uncharacterized protein {ECO:0000313|EMBL:KDP42955.1};	FKBP-type peptidyl-prolyl cis-trans isomerase	GO:0009707,chloroplast outer membrane; GO:0005829,cytosol; GO:0005789,endoplasmic reticulum membrane; GO:0016021,integral component of membrane; GO:0046967,cytosol to ER transport; GO:0015031,protein transport	Tetratricopeptide repeat
Cluster-10658.100087	TRUE	TRUE	TRUE	K04733 interleukin-1 receptor-associated kinase 4 [EC:2.7.11.1] | (RefSeq) receptor-like protein kinase HERK 1 (A)	PREDICTED: uncharacterized protein LOC108211501 [Daucus carota subsp. sativus]	RecName: Full=Heavy metal-associated isoprenylated plant protein 46 {ECO:0000303|PubMed:21072340, ECO:0000303|PubMed:23368984}; Short=AtHIP46 {ECO:0000303|PubMed:21072340, ECO:0000303|PubMed:23368984}; AltName: Full=Farnesylated protein 5 {ECO:0000303|PubMed:8837031}; Short=AtFP5 {ECO:0000303|PubMed:8837031}; Flags: Precursor;	SubName: Full=Uncharacterized protein {ECO:0000313|EMBL:KZN00001.1};	--	GO:0005737,cytoplasm; GO:0046914,transition metal ion binding; GO:0046916,cellular transition metal ion homeostasis; GO:0030001,metal ion transport	--
Cluster-10658.114406	TRUE	TRUE	TRUE	K23050 phenylcoumaran benzylic ether reductase [EC:1.3.1.-] | (RefSeq) isoflavone reductase homolog TP7-like (A)	hypothetical protein LSAT_9X108760 [Lactuca sativa]	RecName: Full=Isoflavone reductase homolog PCBER {ECO:0000305}; EC=1.3.1.- {ECO:0000269|PubMed:10066819}; AltName: Full=Phenylcoumaran benzylic ether reductase POP1 {ECO:0000303|PubMed:10066819}; Short=PCBER-Pop1 {ECO:0000303|PubMed:10066819};	SubName: Full=Isoflavone reductase-like protein 5 {ECO:0000313|EMBL:CAI56334.1};	--	GO:0050664,oxidoreductase activity, acting on NAD(P)H, oxygen as acceptor; GO:0009807,lignan biosynthetic process	NmrA-like family
Cluster-10658.195861	TRUE	TRUE	TRUE	K14638 solute carrier family 15 (peptide/histidine transporter), member 3/4 | (RefSeq) protein NRT1/ PTR FAMILY 1.1-like (A)	PREDICTED: protein NRT1/ PTR FAMILY 1.1-like [Daucus carota subsp. sativus]	RecName: Full=Protein NRT1/ PTR FAMILY 1.2; Short=AtNPF1.2; AltName: Full=Nitrate transporter 1.11;	SubName: Full=Uncharacterized protein {ECO:0000313|EMBL:KZN06876.1};	H+/oligopeptide symporter	GO:0016021,integral component of membrane; GO:0005886,plasma membrane; GO:0080054,low-affinity nitrate transmembrane transporter activity; GO:0015706,nitrate transport	Major Facilitator Superfamily
Cluster-10658.72028	TRUE	TRUE	TRUE	K04733 interleukin-1 receptor-associated kinase 4 [EC:2.7.11.1] | (RefSeq) lysM domain receptor-like kinase 4 (A)	PREDICTED: lysM domain receptor-like kinase 4 [Daucus carota subsp. sativus]	RecName: Full=LysM domain receptor-like kinase 4; Short=LysM-containing receptor-like kinase 4; EC=2.7.11.1; Flags: Precursor;	SubName: Full=Uncharacterized protein {ECO:0000313|EMBL:KZM89187.1};	--	GO:0016021,integral component of membrane; GO:0005886,plasma membrane; GO:0005524,ATP binding; GO:0008061,chitin binding; GO:0004675,transmembrane receptor protein serine/threonine kinase activity; GO:0007166,cell surface receptor signaling pathway; GO:0071323,cellular response to chitin; GO:0071219,cellular response to molecule of bacterial origin; GO:0045087,innate immune response; GO:0006468,p…	LysM domain
Cluster-10658.84624	TRUE	TRUE	TRUE	K04733 interleukin-1 receptor-associated kinase 4 [EC:2.7.11.1] | (RefSeq) L-type lectin-domain containing receptor kinase IX.1-like (A)	PREDICTED: L-type lectin-domain containing receptor kinase IX.1-like [Daucus carota subsp. sativus]	RecName: Full=L-type lectin-domain containing receptor kinase IX.1 {ECO:0000303|PubMed:19773388}; Short=LecRK-IX.1 {ECO:0000303|PubMed:19773388}; EC=2.7.11.1 {ECO:0000255|PROSITE-ProRule:PRU00159}; Flags: Precursor;	SubName: Full=Uncharacterized protein {ECO:0000313|EMBL:KZN09183.1};	--	GO:0016021,integral component of membrane; GO:0005886,plasma membrane; GO:0005524,ATP binding; GO:0030246,carbohydrate binding; GO:0004674,protein serine/threonine kinase activity; GO:0002229,defense response to oomycetes; GO:0010942,positive regulation of cell death; GO:0010726,positive regulation of hydrogen peroxide metabolic process	Fungal protein kinase
Cluster-10658.90885	TRUE	TRUE	TRUE	K01087 trehalose 6-phosphate phosphatase [EC:3.1.3.12] | (RefSeq) trehalose-phosphate phosphatase A-like (A)	PREDICTED: trehalose-phosphate phosphatase A-like [Daucus carota subsp. sativus]	RecName: Full=Trehalose-phosphate phosphatase A; Short=AtTPPA; EC=3.1.3.12; AltName: Full=Trehalose 6-phosphate phosphatase;	RecName: Full=Trehalose 6-phosphate phosphatase {ECO:0000256|RuleBase:RU361117}; EC=3.1.3.12 {ECO:0000256|RuleBase:RU361117};	Trehalose-6-phosphate synthase component TPS1 and related subunits	GO:0004805,trehalose-phosphatase activity; GO:0005992,trehalose biosynthetic process	--
Cluster-10658.91054	TRUE	TRUE	TRUE	K12860 pre-mRNA-splicing factor CDC5/CEF1 | (RefSeq) cell division cycle 5-like protein (A)	PREDICTED: cell division cycle 5-like protein [Daucus carota subsp. sativus]	RecName: Full=Cell division cycle 5-like protein; Short=Cdc5-like protein; AltName: Full=Atypical R2R3-MYB transcription factor CDC5; AltName: Full=MOS4-associated complex protein 1; Short=MAC protein 1; AltName: Full=Protein MYB DOMAIN CELL DIVISION CYCLE 5; Short=AtMYBCD5;	SubName: Full=Uncharacterized protein {ECO:0000313|EMBL:KZM89542.1};	mRNA splicing protein CDC5 (Myb superfamily)	GO:0009507,chloroplast; GO:0005634,nucleus; GO:0005681,spliceosomal complex; GO:0003700,DNA-binding transcription factor activity; GO:0000981,DNA-binding transcription factor activity, RNA polymerase II-specific; GO:0043565,sequence-specific DNA binding; GO:0001135,RNA polymerase II transcription regulator recruiting activity; GO:0044212,transcription regulatory region DNA binding; GO:0007049,cel…	Myb-like DNA-binding domain
Cluster-10658.59402	TRUE	TRUE	TRUE	--	--	--	--	--	--	--
Cluster-10658.63642	TRUE	TRUE	TRUE	K18045 tyrosine-protein phosphatase SIW14 [EC:3.1.3.48] | (RefSeq) probable tyrosine-protein phosphatase At1g05000 isoform X1 (A)	PREDICTED: probable tyrosine-protein phosphatase At1g05000 isoform X2 [Daucus carota subsp. sativus]	RecName: Full=Tyrosine-protein phosphatase DSP1 {ECO:0000305}; EC=3.1.3.48 {ECO:0000255|PROSITE-ProRule:PRU10044, ECO:0000269|PubMed:18433060, ECO:0000269|PubMed:21409566}; AltName: Full=Protein PLANT AND FUNGI ATYPICAL DUAL-SPECIFICITY PHOSPHATASE 1 {ECO:0000303|PubMed:21409566}; Short=AtPFA-DSP1 {ECO:0000303|PubMed:21409566}; AltName: Full=Tyrosine-protein phosphatase At1g05000 {ECO:0000305};	SubName: Full=Uncharacterized protein {ECO:0000313|EMBL:KZM91497.1};	Predicted protein tyrosine phosphatase	GO:0005737,cytoplasm; GO:0016791,phosphatase activity; GO:0004725,protein tyrosine phosphatase activity	Protein-tyrosine phosphatase
Cluster-10658.27131	TRUE	TRUE	TRUE	K02183 calmodulin | (RefSeq) calmodulin-like (A)	PREDICTED: calmodulin-like protein 11 [Malus domestica]	RecName: Full=Calmodulin; Short=CaM;	SubName: Full=calmodulin-like protein 11 isoform X1 {ECO:0000313|RefSeq:XP_018829684.1};	Calmodulin and related proteins (EF-Hand superfamily)	GO:0005509,calcium ion binding	Transcription factor MotA, activation domain
Cluster-10658.109261	TRUE	TRUE	TRUE	K05715 2-phosphoglycerate kinase [EC:2.7.2.-] | (RefSeq) P-loop NTPase domain-containing protein LPA1 homolog 2-like (A)	PREDICTED: P-loop NTPase domain-containing protein LPA1 homolog 2-like [Daucus carota subsp. sativus]	RecName: Full=P-loop NTPase domain-containing protein LPA1 homolog 1 {ECO:0000305}; AltName: Full=Protein LOW PHYTIC ACID 1 homolog 1 {ECO:0000305};	SubName: Full=Uncharacterized protein {ECO:0000313|EMBL:CCB44242.1};	--	GO:0010264,myo-inositol hexakisphosphate biosynthetic process	--
Cluster-10658.73492	TRUE	TRUE	TRUE	K12135 zinc finger protein CONSTANS | (RefSeq) zinc finger protein CONSTANS (A)	unnamed protein product [Coffea canephora]	RecName: Full=Zinc finger protein CONSTANS-LIKE 12;	SubName: Full=Uncharacterized protein {ECO:0000313|EMBL:CDP11818.1};	--	GO:0005634,nucleus; GO:0003700,DNA-binding transcription factor activity; GO:0008270,zinc ion binding; GO:0006355,regulation of transcription, DNA-templated	B-box zinc finger
Cluster-10658.106939	TRUE	TRUE	TRUE	K21396 ATP-binding cassette, subfamily G (WHITE), eye pigment precursor transporter | (RefSeq) ABC transporter G family member 7 (A)	pleiotropic drug resistance transporter 1 [Panax ginseng]	RecName: Full=Pleiotropic drug resistance protein 1; AltName: Full=NtPDR1;	SubName: Full=Pleiotropic drug resistance transporter 1 {ECO:0000313|EMBL:AGT28053.1};	Pleiotropic drug resistance proteins (PDR1-15), ABC superfamily	GO:0016021,integral component of membrane; GO:0005524,ATP binding; GO:0016887,ATPase activity	AAA domain, putative AbiEii toxin, Type IV TA system
Cluster-10658.77387	TRUE	TRUE	TRUE	--	hypothetical protein MANES_S045500 [Manihot esculenta]	--	SubName: Full=Uncharacterized protein {ECO:0000313|EMBL:OAY21923.1};	--	--	--
Cluster-10658.112330	TRUE	TRUE	TRUE	K20892 beta-arabinofuranosyltransferase [EC:2.4.2.-] | (RefSeq) beta-arabinofuranosyltransferase RAY1 (A)	PREDICTED: beta-arabinofuranosyltransferase RAY1 [Daucus carota subsp. sativus]	RecName: Full=Beta-arabinofuranosyltransferase RAY1 {ECO:0000305}; EC=2.4.2.- {ECO:0000305}; AltName: Full=Protein REDUCED ARABINOSE YARIV 1 {ECO:0000303|PubMed:23396039};	SubName: Full=Uncharacterized protein {ECO:0000313|EMBL:KZM87296.1};	--	GO:0005794,Golgi apparatus; GO:0016757,transferase activity, transferring glycosyl groups; GO:0042546,cell wall biogenesis; GO:0071555,cell wall organization	--
Cluster-10658.95685	TRUE	TRUE	TRUE	K04733 interleukin-1 receptor-associated kinase 4 [EC:2.7.11.1] | (RefSeq) probable receptor-like protein kinase At1g11050 (A)	hypothetical protein DCAR_006700 [Daucus carota subsp. sativus]	RecName: Full=Probable receptor-like protein kinase At1g11050; EC=2.7.11.1; Flags: Precursor;	SubName: Full=Uncharacterized protein {ECO:0000313|EMBL:KZN05863.1};	Serine/threonine protein kinase	GO:0016021,integral component of membrane; GO:0005886,plasma membrane; GO:0005524,ATP binding; GO:0004674,protein serine/threonine kinase activity	Protein tyrosine kinase
Cluster-10658.140349	TRUE	TRUE	TRUE	--	PREDICTED: uncharacterized protein LOC108216723 [Daucus carota subsp. sativus]	--	SubName: Full=Uncharacterized protein {ECO:0000313|EMBL:KZM98686.1};	--	--	Domain of unknown function (DUF4228)
Cluster-10658.94248	TRUE	TRUE	TRUE	--	Germin-like protein subfamily 3 member 2 [Morus notabilis]	RecName: Full=Germin-like protein subfamily 3 member 2; Flags: Precursor;	SubName: Full=Germin-like protein subfamily 3 member 2 {ECO:0000313|EMBL:EXB36976.1};	--	GO:0048046,apoplast; GO:0005618,cell wall; GO:0030145,manganese ion binding; GO:0045735,nutrient reservoir activity	Cupin domain
Cluster-10658.144452	TRUE	TRUE	TRUE	K19613 leucine-rich repeat protein SHOC2 | (RefSeq) TMV resistance protein N-like (A)	putative leucine-rich repeat domain, L domain-like protein [Helianthus annuus]	RecName: Full=TMV resistance protein N;	SubName: Full=Putative leucine-rich repeat domain, L domain-like protein {ECO:0000313|EMBL:OTF99447.1};	--	GO:0005737,cytoplasm; GO:0043531,ADP binding; GO:0005524,ATP binding; GO:0009626,plant-type hypersensitive response; GO:0007165,signal transduction	Leucine-rich repeat
Cluster-10658.126048	TRUE	TRUE	TRUE	--	--	--	--	--	--	--
Cluster-10658.37252	TRUE	TRUE	TRUE	K00218 protochlorophyllide reductase [EC:1.3.1.33] | (RefSeq) protochlorophyllide reductase, chloroplastic (A)	PREDICTED: protochlorophyllide reductase, chloroplastic [Daucus carota subsp. sativus]	RecName: Full=Protochlorophyllide reductase, chloroplastic; Short=PCR; EC=1.3.1.33; AltName: Full=NADPH-protochlorophyllide oxidoreductase; Short=POR; Flags: Precursor;	RecName: Full=NADPH-protochlorophyllide oxidoreductase {ECO:0000256|RuleBase:RU365001}; EC=1.3.1.33 {ECO:0000256|RuleBase:RU365001};	Dehydrogenases with different specificities (related to short-chain alcohol dehydrogenases)	GO:0009507,chloroplast; GO:0016630,protochlorophyllide reductase activity; GO:0015995,chlorophyll biosynthetic process; GO:0015979,photosynthesis	KR domain
Cluster-10658.106705	TRUE	TRUE	TRUE	K14209 solute carrier family 36 (proton-coupled amino acid transporter) | (RefSeq) lysine histidine transporter-like 8 (A)	PREDICTED: lysine histidine transporter-like 8 [Daucus carota subsp. sativus]	RecName: Full=Lysine histidine transporter-like 8; AltName: Full=Amino acid transporter-like protein 1;	SubName: Full=Uncharacterized protein {ECO:0000313|EMBL:KZM90225.1};	Amino acid transporters	GO:0016021,integral component of membrane; GO:0005886,plasma membrane; GO:0015171,amino acid transmembrane transporter activity; GO:0003333,amino acid transmembrane transport	Transmembrane amino acid transporter protein
Cluster-10658.189279	TRUE	TRUE	TRUE	--	--	--	--	--	--	--
Cluster-10658.21387	TRUE	TRUE	TRUE	K17605 serine/threonine-protein phosphatase 2A activator | (RefSeq) serine/threonine-protein phosphatase 2A activator 2-like isoform X1 (A)	PREDICTED: F-box protein FBW2-like [Daucus carota subsp. sativus]	RecName: Full=F-box protein FBW2; AltName: Full=SKP1-interacting partner 18;	SubName: Full=Uncharacterized protein {ECO:0000313|EMBL:KZN10840.1};	Leucine rich repeat proteins, some proteins contain F-box	GO:0005634,nucleus; GO:0010629,negative regulation of gene expression; GO:0010608,posttranscriptional regulation of gene expression; GO:0016567,protein ubiquitination; GO:0009737,response to abscisic acid; GO:0006511,ubiquitin-dependent protein catabolic process	F-box-like
Cluster-10658.183029	TRUE	TRUE	TRUE	--	--	--	--	--	--	--
Cluster-10658.86621	TRUE	TRUE	TRUE	K07408 cytochrome P450 family 1 subfamily A polypeptide 1 [EC:1.14.14.1] | (RefSeq) cytochrome P450 71A4-like (A)	CYP71AJ5 [Thapsia garganica]	RecName: Full=Psoralen synthase; EC=1.14.13.102; AltName: Full=Cytochrome P450 CYP71AJ1;	SubName: Full=CYP71AJ5 {ECO:0000313|EMBL:AKJ23348.1};	Cytochrome P450 CYP2 subfamily	GO:0005789,endoplasmic reticulum membrane; GO:0016021,integral component of membrane; GO:0043231,intracellular membrane-bounded organelle; GO:0031090,organelle membrane; GO:0020037,heme binding; GO:0005506,iron ion binding; GO:0016709,oxidoreductase activity, acting on paired donors, with incorporation or reduction of molecular oxygen, NAD(P)H as one donor, and incorporation of one atom of oxygen…	Cytochrome P450
Cluster-10658.63052	TRUE	TRUE	TRUE	K01087 trehalose 6-phosphate phosphatase [EC:3.1.3.12] | (RefSeq) trehalose-phosphate phosphatase A-like (A)	hypothetical protein DCAR_009441 [Daucus carota subsp. sativus]	RecName: Full=Trehalose-phosphate phosphatase A; Short=AtTPPA; EC=3.1.3.12; AltName: Full=Trehalose 6-phosphate phosphatase;	RecName: Full=Trehalose 6-phosphate phosphatase {ECO:0000256|RuleBase:RU361117}; EC=3.1.3.12 {ECO:0000256|RuleBase:RU361117};	Trehalose-6-phosphate synthase component TPS1 and related subunits	GO:0004805,trehalose-phosphatase activity; GO:0005992,trehalose biosynthetic process	--
Cluster-10658.95858	TRUE	TRUE	TRUE	--	hypothetical protein DCAR_006902 [Daucus carota subsp. sativus]	--	SubName: Full=Uncharacterized protein {ECO:0000313|EMBL:KZN06065.1};	--	GO:0016021,integral component of membrane	LysM domain
Cluster-10658.108522	TRUE	TRUE	TRUE	K15015 solute carrier family 32 (vesicular inhibitory amino acid transporter) | (RefSeq) lysine histidine transporter 2 (A)	lysine histidine transporter [Panax ginseng]	RecName: Full=Lysine histidine transporter 1;	SubName: Full=Lysine histidine transporter {ECO:0000313|EMBL:AGN03890.1};	Amino acid transporters	GO:0016021,integral component of membrane; GO:0005886,plasma membrane; GO:0015171,amino acid transmembrane transporter activity; GO:0015293,symporter activity; GO:0043090,amino acid import; GO:0080167,response to karrikin	Transmembrane amino acid transporter protein
Cluster-10658.151485	TRUE	TRUE	TRUE	K16818 phospholipase A1 [EC:3.1.1.32] | (RefSeq) hypothetical protein (A)	PREDICTED: phospholipase A1-Igamma1, chloroplastic [Daucus carota subsp. sativus]	RecName: Full=Phospholipase A1-Igamma1, chloroplastic; EC=3.1.1.-; Flags: Precursor;	SubName: Full=Uncharacterized protein {ECO:0000313|EMBL:KZN11223.1};	Predicted lipase	GO:0009507,chloroplast; GO:0047714,galactolipase activity; GO:0008970,phospholipase A1 activity; GO:0004806,triglyceride lipase activity; GO:0016042,lipid catabolic process	Serine aminopeptidase, S33
Cluster-3123.0	TRUE	TRUE	TRUE	--	--	--	--	--	--	--
Cluster-10658.81175	TRUE	TRUE	TRUE	K10256 omega-6 fatty acid desaturase / acyl-lipid omega-6 desaturase (Delta-12 desaturase) [EC:1.14.19.6 1.14.19.22] | (RefSeq) delta(12) fatty acid desaturase FAD2-like (A)	fungal elicitor-induced protein [Petroselinum crispum]	RecName: Full=Delta(12)-fatty-acid desaturase FAD2 {ECO:0000303|PubMed:12481086}; EC=1.14.19.6 {ECO:0000269|PubMed:12481086};	SubName: Full=Fungal elicitor-induced protein {ECO:0000313|EMBL:AAB80697.1};	--	GO:0005789,endoplasmic reticulum membrane; GO:0016021,integral component of membrane; GO:0102985,Delta12-fatty-acid desaturase activity; GO:0006636,unsaturated fatty acid biosynthetic process	Domain of unknown function (DUF3474)
Cluster-10658.117881	TRUE	TRUE	TRUE	K11446 histone demethylase JARID1 [EC:1.14.11.-] | (RefSeq) lysine-specific demethylase JMJ706-like (A)	PREDICTED: lysine-specific demethylase JMJ706-like isoform X1 [Daucus carota subsp. sativus]	RecName: Full=Lysine-specific demethylase JMJ706; EC=1.14.11.-; AltName: Full=Jumonji domain-containing protein 706; AltName: Full=Lysine-specific histone demethylase JMJ706; AltName: Full=Protein JUMONJI 706;	SubName: Full=Uncharacterized protein {ECO:0000313|EMBL:KZN11618.1};	DNA-binding protein jumonji/RBP2/SMCY, contains JmjC domain	GO:0000792,heterochromatin; GO:0005634,nucleus; GO:0051213,dioxygenase activity; GO:0032454,histone demethylase activity (H3-K9 specific); GO:0046872,metal ion binding; GO:0048439,flower morphogenesis; GO:0045815,positive regulation of gene expression, epigenetic; GO:0006355,regulation of transcription, DNA-templated; GO:0006351,transcription, DNA-templated	C5HC2 zinc finger
Cluster-10658.82399	TRUE	TRUE	TRUE	K20892 beta-arabinofuranosyltransferase [EC:2.4.2.-] | (RefSeq) beta-arabinofuranosyltransferase RAY1 (A)	PREDICTED: beta-arabinofuranosyltransferase RAY1 [Daucus carota subsp. sativus]	RecName: Full=Beta-arabinofuranosyltransferase RAY1 {ECO:0000305}; EC=2.4.2.- {ECO:0000305}; AltName: Full=Protein REDUCED ARABINOSE YARIV 1 {ECO:0000303|PubMed:23396039};	SubName: Full=Uncharacterized protein {ECO:0000313|EMBL:KZM87296.1};	--	GO:0005794,Golgi apparatus; GO:0016757,transferase activity, transferring glycosyl groups; GO:0042546,cell wall biogenesis; GO:0071555,cell wall organization	Nucleotide-diphospho-sugar transferase
Cluster-10658.101415	TRUE	TRUE	TRUE	K20727 defensin-like protein 16 | (RefSeq) defensin-like protein 3 (A)	hypothetical protein DCAR_028974 [Daucus carota subsp. sativus]	RecName: Full=Defensin-like protein 1; AltName: Full=Cysteine-rich antimicrobial protein 1; AltName: Full=Defensin AMP1; Short=CtAMP1;	SubName: Full=Uncharacterized protein {ECO:0000313|EMBL:KZM81361.1};	--	GO:0005576,extracellular region; GO:0050832,defense response to fungus; GO:0031640,killing of cells of other organism	Gamma-thionin family
Cluster-10658.43681	TRUE	TRUE	TRUE	K03006 DNA-directed RNA polymerase II subunit RPB1 [EC:2.7.7.6] | (RefSeq) early nodulin-like protein 2 isoform X1 (A)	PREDICTED: early nodulin-like protein 2 [Daucus carota subsp. sativus]	RecName: Full=Early nodulin-like protein 2; AltName: Full=Phytocyanin-like protein; Flags: Precursor;	SubName: Full=Putative cupredoxin {ECO:0000313|EMBL:OTG04603.1};	--	GO:0031225,anchored component of membrane; GO:0046658,anchored component of plasma membrane; GO:0048046,apoplast; GO:0009507,chloroplast; GO:0005886,plasma membrane; GO:0005773,vacuole; GO:0009055,electron transfer activity	Plastocyanin-like domain
Cluster-10658.100890	TRUE	TRUE	TRUE	--	PREDICTED: uncharacterized protein LOC108995872 isoform X3 [Juglans regia]	--	SubName: Full=uncharacterized protein LOC108995872 isoform X3 {ECO:0000313|RefSeq:XP_018827055.1, ECO:0000313|RefSeq:XP_018827056.1, ECO:0000313|RefSeq:XP_018827057.1};	--	--	BRO1-like domain
Cluster-10658.113321	TRUE	TRUE	TRUE	K04733 interleukin-1 receptor-associated kinase 4 [EC:2.7.11.1] | (RefSeq) probable serine/threonine-protein kinase PBL3 (A)	probable serine/threonine-protein kinase PBL3 isoform X1 [Prunus persica]	RecName: Full=Probable serine/threonine-protein kinase PBL3 {ECO:0000305}; EC=2.7.11.1 {ECO:0000305}; AltName: Full=PBS1-like protein 3 {ECO:0000303|PubMed:20413097}; AltName: Full=Protein kinase 2B {ECO:0000305};	SubName: Full=Uncharacterized protein {ECO:0000313|EMBL:EMJ23784.1};	Serine/threonine protein kinase	GO:0005737,cytoplasm; GO:0005634,nucleus; GO:0005886,plasma membrane; GO:0005524,ATP binding; GO:0004675,transmembrane receptor protein serine/threonine kinase activity; GO:0007166,cell surface receptor signaling pathway; GO:0006952,defense response; GO:0006468,protein phosphorylation	Protein tyrosine kinase
Cluster-10658.114208	TRUE	TRUE	TRUE	K09422 transcription factor MYB, plant | (RefSeq) transcription factor MYB108 (A)	PREDICTED: transcription factor MYB108 [Daucus carota subsp. sativus]	RecName: Full=Transcription factor MYB78 {ECO:0000303|PubMed:9839469}; AltName: Full=Myb-related protein 78 {ECO:0000303|PubMed:9839469}; Short=AtMYB78 {ECO:0000303|PubMed:9839469};	SubName: Full=Uncharacterized protein {ECO:0000313|EMBL:KZN09868.1};	Transcription factor, Myb superfamily	GO:0005634,nucleus; GO:0003700,DNA-binding transcription factor activity; GO:0043565,sequence-specific DNA binding; GO:0009737,response to abscisic acid; GO:1902074,response to salt; GO:0009651,response to salt stress; GO:0006351,transcription, DNA-templated	Myb-like DNA-binding domain
Cluster-10658.102059	TRUE	TRUE	TRUE	K15746 beta-carotene 3-hydroxylase [EC:1.14.15.24] | (RefSeq) beta-carotene hydroxylase 2, chloroplastic (A)	PREDICTED: beta-carotene hydroxylase 2, chloroplastic [Vitis vinifera]	RecName: Full=Beta-carotene hydroxylase 1, chloroplastic; EC=1.14.15.24 {ECO:0000250|UniProtKB:Q9SZZ8}; Flags: Precursor;	SubName: Full=Uncharacterized protein {ECO:0000313|EMBL:CCB47839.1};	--	GO:0031969,chloroplast membrane; GO:0016021,integral component of membrane; GO:0016787,hydrolase activity; GO:0005506,iron ion binding; GO:0016491,oxidoreductase activity; GO:0016117,carotenoid biosynthetic process	Yip1 domain
Cluster-10658.153867	TRUE	TRUE	TRUE	K00858 NAD+ kinase [EC:2.7.1.23] | (RefSeq) NAD(H) kinase 1 (A)	PREDICTED: NAD(H) kinase 1-like isoform X2 [Lupinus angustifolius]	RecName: Full=NAD(H) kinase 1; Short=AtNADK-1; EC=2.7.1.23; EC=2.7.1.86;	SubName: Full=NADH kinase {ECO:0000313|EMBL:AFN88238.1}; EC=2.7.1.86 {ECO:0000313|EMBL:AFN88238.1}; Flags: Fragment;	Predicted sugar kinase	GO:0005524,ATP binding; GO:0003951,NAD+ kinase activity; GO:0042736,NADH kinase activity; GO:0019674,NAD metabolic process; GO:0006741,NADP biosynthetic process	ATP-NAD kinase
Cluster-10658.133343	TRUE	TRUE	TRUE	--	--	--	--	--	--	--
Cluster-10658.71732	TRUE	TRUE	TRUE	--	PREDICTED: uncharacterized protein LOC108205648 [Daucus carota subsp. sativus]	--	SubName: Full=Uncharacterized protein {ECO:0000313|EMBL:KZN03610.1};	--	GO:0016021,integral component of membrane; GO:0016787,hydrolase activity; GO:0006629,lipid metabolic process	Lipase (class 3)
Cluster-10658.44468	TRUE	TRUE	TRUE	--	PREDICTED: uncharacterized protein LOC108217899 isoform X2 [Daucus carota subsp. sativus]	--	SubName: Full=Uncharacterized protein {ECO:0000313|EMBL:KZM99759.1};	--	--	--
Cluster-10658.63449	TRUE	TRUE	TRUE	K04733 interleukin-1 receptor-associated kinase 4 [EC:2.7.11.1] | (RefSeq) putative serine/threonine-protein kinase (A)	PREDICTED: putative serine/threonine-protein kinase [Daucus carota subsp. sativus]	RecName: Full=Cold-responsive protein kinase 1 {ECO:0000303|PubMed:28344081}; EC=2.7.11.1 {ECO:0000255|PROSITE-ProRule:PRU00159, ECO:0000269|PubMed:28344081};	SubName: Full=putative serine/threonine-protein kinase isoform X1 {ECO:0000313|RefSeq:XP_016475821.1};	Serine/threonine protein kinase	GO:0005886,plasma membrane; GO:0005524,ATP binding; GO:0004674,protein serine/threonine kinase activity; GO:0033160,positive regulation of protein import into nucleus, translocation; GO:0046777,protein autophosphorylation; GO:0009409,response to cold; GO:0050826,response to freezing; GO:0009625,response to insect; GO:0002237,response to molecule of bacterial origin	Haspin like kinase domain
Cluster-10658.75425	TRUE	TRUE	TRUE	K15634 probable phosphoglycerate mutase [EC:5.4.2.12] | (RefSeq) metal-independent phosphoserine phosphatase-like (A)	PREDICTED: uncharacterized protein LOC108205366 [Daucus carota subsp. sativus]	--	SubName: Full=Uncharacterized protein {ECO:0000313|EMBL:KZN10317.1};	Fructose-6-phosphate 2-kinase/fructose-2,6-biphosphatase	--	Histidine phosphatase superfamily (branch 1)
Cluster-10658.101621	TRUE	TRUE	TRUE	K02183 calmodulin | (RefSeq) calmodulin-2/4-like (A)	calmodulin-2/4-like [Olea europaea var. sylvestris]	RecName: Full=Calmodulin-2/4; Short=CaM-2/4; Flags: Fragment;	SubName: Full=Uncharacterized protein {ECO:0000313|EMBL:ESR59637.1};	Calmodulin and related proteins (EF-Hand superfamily)	GO:0005509,calcium ion binding	Uncharacterised protein family (UPF0154)
Cluster-10658.106089	TRUE	TRUE	TRUE	K10256 omega-6 fatty acid desaturase / acyl-lipid omega-6 desaturase (Delta-12 desaturase) [EC:1.14.19.6 1.14.19.22] | (RefSeq) delta(12)-fatty-acid desaturase FAD2-like (A)	PREDICTED: delta(12)-fatty-acid desaturase FAD2-like [Daucus carota subsp. sativus]	RecName: Full=Delta(12)-fatty-acid desaturase FAD2 {ECO:0000303|PubMed:12481086}; EC=1.14.19.6 {ECO:0000269|PubMed:12481086};	SubName: Full=Uncharacterized protein {ECO:0000313|EMBL:KZM96545.1};	--	GO:0005789,endoplasmic reticulum membrane; GO:0016021,integral component of membrane; GO:0102985,Delta12-fatty-acid desaturase activity; GO:0006636,unsaturated fatty acid biosynthetic process	Fatty acid desaturase
Cluster-10658.87793	TRUE	TRUE	TRUE	--	PREDICTED: uncharacterized protein LOC103500780 [Cucumis melo]	RecName: Full=Transcription factor MYBS3 {ECO:0000303|PubMed:12172034}; AltName: Full=Myb-related protein S3 {ECO:0000303|PubMed:12172034}; Short=OsMYBS3 {ECO:0000303|PubMed:12172034};	SubName: Full=uncharacterized protein LOC103500780 {ECO:0000313|RefSeq:XP_016902851.1};	--	GO:0005634,nucleus; GO:0003677,DNA binding; GO:0003700,DNA-binding transcription factor activity; GO:0046872,metal ion binding; GO:0045892,negative regulation of transcription, DNA-templated; GO:0009723,response to ethylene; GO:0009739,response to gibberellin; GO:0009744,response to sucrose; GO:0006351,transcription, DNA-templated	--
Cluster-10658.100333	TRUE	TRUE	TRUE	K09422 transcription factor MYB, plant | (RefSeq) transcription factor RAX2-like (A)	PREDICTED: transcription factor RAX2-like [Daucus carota subsp. sativus]	RecName: Full=Transcription factor RAX2; AltName: Full=Myb-related protein 38; Short=AtMYB38; AltName: Full=Protein REGULATOR OF AXILLARY MERISTEMS 2;	SubName: Full=Uncharacterized protein {ECO:0000313|EMBL:KZN08105.1};	Transcription factor, Myb superfamily	GO:0005634,nucleus; GO:0003700,DNA-binding transcription factor activity; GO:0000981,DNA-binding transcription factor activity, RNA polymerase II-specific; GO:0043565,sequence-specific DNA binding; GO:0001135,RNA polymerase II transcription regulator recruiting activity; GO:0044212,transcription regulatory region DNA binding; GO:0009785,blue light signaling pathway; GO:0030154,cell differentiatio…	Myb-like DNA-binding domain
Cluster-10658.76669	TRUE	TRUE	TRUE	--	--	--	--	--	--	--
Cluster-10658.82938	TRUE	TRUE	TRUE	K14611 solute carrier family 23 (nucleobase transporter), member 1/2 | (RefSeq) nucleobase-ascorbate transporter 2 (A)	PREDICTED: uncharacterized protein LOC108199883 [Daucus carota subsp. sativus]	RecName: Full=Nucleobase-ascorbate transporter 2; Short=AtNAT2;	SubName: Full=Uncharacterized protein {ECO:0000313|EMBL:KZM85718.1};	--	GO:0016021,integral component of membrane; GO:0022857,transmembrane transporter activity	Domain found in Dishevelled, Egl-10, and Pleckstrin (DEP)
Cluster-10658.22449	TRUE	TRUE	TRUE	K10398 kinesin family member 11 | (RefSeq) kinesin-like protein KIN-5D (A)	KRP120-2 [Daucus carota]	RecName: Full=Kinesin-like protein KIN-5D {ECO:0000305};	SubName: Full=KRP120-2 {ECO:0000313|EMBL:AAK91129.1};	Kinesin-like protein	GO:0005737,cytoplasm; GO:0005871,kinesin complex; GO:0005874,microtubule; GO:0005886,plasma membrane; GO:0005819,spindle; GO:0005524,ATP binding; GO:0008574,ATP-dependent microtubule motor activity, plus-end-directed; GO:0008017,microtubule binding; GO:0007018,microtubule-based movement	Microtubule binding
Cluster-10658.131303	TRUE	TRUE	TRUE	--	--	--	--	--	--	--
Cluster-10658.140943	TRUE	TRUE	TRUE	K20855 beta-1,3-galactosyltransferase 1/2/3/4/5/7/8 [EC:2.4.1.-] | (RefSeq) beta-1,3-galactosyltransferase 7-like (A)	hypothetical protein DCAR_014790 [Daucus carota subsp. sativus]	RecName: Full=Beta-1,3-galactosyltransferase 7; EC=2.4.1.-;	RecName: Full=Hexosyltransferase {ECO:0000256|RuleBase:RU363063}; EC=2.4.1.- {ECO:0000256|RuleBase:RU363063};	Galactosyltransferases	GO:0005794,Golgi apparatus; GO:0000139,Golgi membrane; GO:0016021,integral component of membrane; GO:0048531,beta-1,3-galactosyltransferase activity; GO:0006486,protein glycosylation	Fringe-like
Cluster-10658.52618	TRUE	TRUE	TRUE	K19791 iron transport multicopper oxidase | (RefSeq) monocopper oxidase-like protein SKU5 isoform X1 (A)	PREDICTED: monocopper oxidase-like protein SKU5 isoform X2 [Daucus carota subsp. sativus]	RecName: Full=L-ascorbate oxidase homolog; EC=1.10.3.-; Flags: Precursor;	SubName: Full=Uncharacterized protein {ECO:0000313|EMBL:KZM95833.1};	Multicopper oxidases	GO:0005576,extracellular region; GO:0005507,copper ion binding; GO:0016491,oxidoreductase activity	Multicopper oxidase
Cluster-10658.149507	TRUE	TRUE	TRUE	K09419 heat shock transcription factor, other eukaryote | (RefSeq) heat shock factor protein HSF30-like (A)	PREDICTED: heat shock factor protein HSF30-like [Daucus carota subsp. sativus]	RecName: Full=Heat shock factor protein HSF30; AltName: Full=Heat shock transcription factor 30; Short=HSTF 30; AltName: Full=Heat stress transcription factor;	SubName: Full=Uncharacterized protein {ECO:0000313|EMBL:KZN06896.1};	Heat shock transcription factor	GO:0005634,nucleus; GO:0003700,DNA-binding transcription factor activity; GO:0043565,sequence-specific DNA binding; GO:0006351,transcription, DNA-templated	HSF-type DNA-binding
Cluster-10658.10131	TRUE	TRUE	TRUE	K17964 leucine-rich PPR motif-containing protein, mitochondrial | (RefSeq) pentatricopeptide repeat-containing protein At5g61990, mitochondrial-like (A)	pentatricopeptide repeat-containing protein At5g01110 [Herrania umbratica]	RecName: Full=Pentatricopeptide repeat-containing protein At5g01110;	SubName: Full=Uncharacterized protein {ECO:0000313|EMBL:CAN63985.1};	FOG: PPR repeat	GO:0005739,mitochondrion; GO:0004519,endonuclease activity; GO:0003723,RNA binding; GO:0032543,mitochondrial translation; GO:0009451,RNA modification	Sensor_kinase_SpoOB-type, alpha-helical domain
Cluster-10658.48956	TRUE	TRUE	TRUE	--	--	--	--	--	--	--
Cluster-10658.98588	TRUE	TRUE	TRUE	--	PREDICTED: patatin-like protein 2 [Daucus carota subsp. sativus]	RecName: Full=Patatin-like protein 3; Short=AtPLP3; EC=3.1.1.-; AltName: Full=Patatin-related phospholipase A IIbeta; Short=pPLAIIb; AltName: Full=Phospholipase A IVC; Short=AtPLAIVC;	RecName: Full=Patatin {ECO:0000256|RuleBase:RU361262}; EC=3.1.1.- {ECO:0000256|RuleBase:RU361262};	Ca2+-independent phospholipase A2	GO:0005737,cytoplasm; GO:0016020,membrane; GO:0047372,acylglycerol lipase activity; GO:0004620,phospholipase activity; GO:0006952,defense response; GO:0016042,lipid catabolic process; GO:0009737,response to abscisic acid	Patatin-like phospholipase
Cluster-10658.81216	TRUE	TRUE	TRUE	K10664 E3 ubiquitin-protein ligase ATL6/9/15/31/42/55 [EC:2.3.2.27] | (RefSeq) E3 ubiquitin-protein ligase ATL6 (A)	PREDICTED: E3 ubiquitin-protein ligase ATL6 [Daucus carota subsp. sativus]	--	SubName: Full=Uncharacterized protein {ECO:0000313|EMBL:KZM81820.1};	--	GO:0016021,integral component of membrane	--
Cluster-10658.158626	TRUE	TRUE	TRUE	--	PREDICTED: uncharacterized protein LOC108211544 [Daucus carota subsp. sativus]	--	SubName: Full=Uncharacterized protein {ECO:0000313|EMBL:KZN01679.1};	--	--	Domain of unknown function (DUF3527)
Cluster-10658.105812	TRUE	TRUE	TRUE	K00297 methylenetetrahydrofolate reductase (NADPH) [EC:1.5.1.20] | (RefSeq) methylenetetrahydrofolate reductase 1-like (A)	PREDICTED: methylenetetrahydrofolate reductase 1-like [Daucus carota subsp. sativus]	RecName: Full=Probable methylenetetrahydrofolate reductase; EC=1.5.1.20;	RecName: Full=Methylenetetrahydrofolate reductase {ECO:0000256|RuleBase:RU003862}; EC=1.5.1.20 {ECO:0000256|RuleBase:RU003862};	5,10-methylenetetrahydrofolate reductase	GO:0005829,cytosol; GO:0004489,methylenetetrahydrofolate reductase (NAD(P)H) activity; GO:0006555,methionine metabolic process; GO:0006730,one-carbon metabolic process; GO:0035999,tetrahydrofolate interconversion	--
Cluster-10658.75214	TRUE	TRUE	TRUE	--	PREDICTED: VQ motif-containing protein 10 [Daucus carota subsp. sativus]	RecName: Full=VQ motif-containing protein 10 {ECO:0000303|PubMed:22535423}; Short=AtVQ10 {ECO:0000303|PubMed:22535423}; AltName: Full=Tobacco rattle virus-induced protein variant 1 {ECO:0000312|EMBL:AAV69753.1};	SubName: Full=Uncharacterized protein {ECO:0000313|EMBL:KZM91578.1};	--	GO:0005634,nucleus; GO:0006979,response to oxidative stress	VQ motif
Cluster-10658.126911	TRUE	TRUE	TRUE	K23108 benzoate---CoA ligase [EC:6.2.1.25] | (RefSeq) BZO1; benzoyloxyglucosinolate 1 (A)	PREDICTED: butyrate--CoA ligase AAE11, peroxisomal-like [Daucus carota subsp. sativus]	RecName: Full=Butyrate--CoA ligase AAE11, peroxisomal; EC=6.2.1.2; AltName: Full=Acyl-activating enzyme 11; AltName: Full=Butyryl-CoA synthetase;	SubName: Full=Uncharacterized protein {ECO:0000313|EMBL:KZM98498.1};	Acyl-CoA synthetase	GO:0005777,peroxisome; GO:0047760,butyrate-CoA ligase activity; GO:0019605,butyrate metabolic process	AMP-binding enzyme C-terminal domain
Cluster-10658.98266	TRUE	TRUE	TRUE	K23108 benzoate---CoA ligase [EC:6.2.1.25] | (RefSeq) BZO1; benzoyloxyglucosinolate 1 (A)	PREDICTED: butyrate--CoA ligase AAE11, peroxisomal-like [Daucus carota subsp. sativus]	RecName: Full=Butyrate--CoA ligase AAE11, peroxisomal; EC=6.2.1.2; AltName: Full=Acyl-activating enzyme 11; AltName: Full=Butyryl-CoA synthetase;	SubName: Full=Uncharacterized protein {ECO:0000313|EMBL:KZM98498.1};	Acyl-CoA synthetase	GO:0005777,peroxisome; GO:0047760,butyrate-CoA ligase activity; GO:0019605,butyrate metabolic process	AMP-binding enzyme C-terminal domain
Cluster-10658.100787	TRUE	TRUE	TRUE	K06269 serine/threonine-protein phosphatase PP1 catalytic subunit [EC:3.1.3.16] | (RefSeq) serine/threonine-protein phosphatase PP1 (A)	PREDICTED: serine/threonine-protein phosphatase PP1 [Daucus carota subsp. sativus]	RecName: Full=Serine/threonine-protein phosphatase PP1; EC=3.1.3.16;	RecName: Full=Serine/threonine-protein phosphatase {ECO:0000256|RuleBase:RU004273}; EC=3.1.3.16 {ECO:0000256|RuleBase:RU004273};	Serine/threonine specific protein phosphatase PP1, catalytic subunit	GO:0005634,nucleus; GO:0046872,metal ion binding; GO:0004722,protein serine/threonine phosphatase activity; GO:0006468,protein phosphorylation; GO:0010161,red light signaling pathway	Serine-threonine protein phosphatase N-terminal domain
Cluster-10658.111794	TRUE	TRUE	TRUE	K20628 expansin | (RefSeq) expansin-B18-like (A)	PREDICTED: expansin-like B1 [Daucus carota subsp. sativus]	RecName: Full=Expansin-like B1; Short=At-EXPR1; Short=AtEXLB1; Short=AtEXPR1; AltName: Full=Ath-ExpBeta-3.1; Flags: Precursor;	SubName: Full=Uncharacterized protein {ECO:0000313|EMBL:KZN07494.1};	--	GO:0005576,extracellular region; GO:0019953,sexual reproduction	Lytic transglycolase
Cluster-10658.105936	TRUE	TRUE	TRUE	K09419 heat shock transcription factor, other eukaryote | (RefSeq) heat shock factor protein HSF24 (A)	PREDICTED: heat shock factor protein HSF24 [Nicotiana attenuata]	RecName: Full=Heat shock factor protein HSF24; AltName: Full=Heat shock transcription factor 24; Short=HSTF 24; AltName: Full=Heat stress transcription factor;	SubName: Full=Uncharacterized protein {ECO:0000313|EMBL:CBI21429.3};	Ca2+-binding protein (centrin/caltractin), EF-Hand superfamily protein	GO:0005634,nucleus; GO:0003700,DNA-binding transcription factor activity; GO:0043565,sequence-specific DNA binding; GO:0006351,transcription, DNA-templated	PDZ domain of MCC-2 bdg protein for Usher syndrome
Cluster-10658.110631	TRUE	TRUE	TRUE	K23480 zinc finger protein 362/384 | (RefSeq) zinc finger protein ZAT5 (A)	zinc finger DNA-binding protein [Catharanthus roseus]	RecName: Full=Zinc finger protein ZAT10; AltName: Full=Salt-tolerance zinc finger;	SubName: Full=Zinc finger DNA-binding protein {ECO:0000313|EMBL:CAF74935.1};	FOG: Zn-finger	GO:0005634,nucleus; GO:0003700,DNA-binding transcription factor activity; GO:0046872,metal ion binding; GO:0043565,sequence-specific DNA binding; GO:0035264,multicellular organism growth; GO:0045892,negative regulation of transcription, DNA-templated; GO:0010117,photoprotection; GO:0015979,photosynthesis; GO:0009737,response to abscisic acid; GO:0010200,response to chitin; GO:0009409,response to …	C2H2 type zinc-finger (2 copies)
Cluster-10658.45336	TRUE	TRUE	TRUE	K13425 WRKY transcription factor 22 | (RefSeq) probable WRKY transcription factor 29 (A)	hypothetical protein DCAR_004610 [Daucus carota subsp. sativus]	RecName: Full=WRKY transcription factor 22; AltName: Full=WRKY DNA-binding protein 22;	SubName: Full=Uncharacterized protein {ECO:0000313|EMBL:KZN11954.1};	--	GO:0005634,nucleus; GO:0003700,DNA-binding transcription factor activity; GO:0043565,sequence-specific DNA binding; GO:0006952,defense response; GO:0010150,leaf senescence; GO:0010200,response to chitin; GO:0006351,transcription, DNA-templated	WRKY DNA -binding domain
Cluster-10658.43272	TRUE	TRUE	TRUE	--	PREDICTED: uncharacterized protein LOC108998743 [Juglans regia]	RecName: Full=Chaperonin-like RbcX protein 2, chloroplastic {ECO:0000303|PubMed:21922322}; Short=AtRBCX2 {ECO:0000303|PubMed:21922322}; Flags: Precursor;	SubName: Full=uncharacterized protein LOC108998743 {ECO:0000313|RefSeq:XP_018830982.1, ECO:0000313|RefSeq:XP_018830983.1};	--	GO:0009570,chloroplast stroma; GO:0044183,protein binding involved in protein folding; GO:0061077,chaperone-mediated protein folding	RbcX protein
Cluster-10658.84087	TRUE	TRUE	TRUE	--	--	--	--	--	--	--
Cluster-10658.52077	TRUE	TRUE	TRUE	--	PREDICTED: uncharacterized protein LOC108211813 [Daucus carota subsp. sativus]	--	SubName: Full=Uncharacterized protein {ECO:0000313|EMBL:CCB47558.1};	--	GO:0022625,cytosolic large ribosomal subunit; GO:0003723,RNA binding; GO:0003735,structural constituent of ribosome; GO:0042254,ribosome biogenesis; GO:0006412,translation	Protein of unknown function (DUF1666)
Cluster-10658.145360	TRUE	TRUE	TRUE	K17618 ubiquitin-like domain-containing CTD phosphatase 1 [EC:3.1.3.16] | (RefSeq) NLI interacting factor-like phosphatase (A)	PREDICTED: uncharacterized protein LOC108195136 [Daucus carota subsp. sativus]	--	SubName: Full=Uncharacterized protein {ECO:0000313|EMBL:KZM88365.1};	--	--	NLI interacting factor-like phosphatase
Cluster-10658.123557	TRUE	TRUE	TRUE	--	--	--	--	--	--	--
Cluster-10658.102111	TRUE	TRUE	TRUE	K00799 glutathione S-transferase [EC:2.5.1.18] | (RefSeq) probable glutathione S-transferase (A)	PREDICTED: probable glutathione S-transferase [Daucus carota subsp. sativus]	RecName: Full=Probable glutathione S-transferase; EC=2.5.1.18; AltName: Full=Auxin-induced protein PGNT1/PCNT110;	SubName: Full=Uncharacterized protein {ECO:0000313|EMBL:KZN03389.1};	Glutathione S-transferase	GO:0004364,glutathione transferase activity; GO:0009734,auxin-activated signaling pathway	Glutathione S-transferase, C-terminal domain
Cluster-10658.19934	TRUE	TRUE	TRUE	--	--	--	--	--	--	--
Cluster-10658.22603	TRUE	TRUE	TRUE	K02184 formin 2 | (RefSeq) formin-like protein 1 (A)	PREDICTED: formin-like protein 1, partial [Prunus mume]	RecName: Full=Formin-like protein 1; Short=AtFH1; Short=AtFORMIN-8; Flags: Precursor;	RecName: Full=Formin-like protein {ECO:0000256|RuleBase:RU361260};	Rho GTPase effector BNI1 and related formins	GO:0005618,cell wall; GO:0016021,integral component of membrane; GO:0016020,membrane; GO:0005886,plasma membrane; GO:0003779,actin binding; GO:0051015,actin filament binding; GO:0030036,actin cytoskeleton organization; GO:0045010,actin nucleation; GO:0051016,barbed-end actin filament capping	Formin Homology 2 Domain
Cluster-10658.83201	TRUE	TRUE	TRUE	--	--	--	--	--	--	--
Cluster-10658.36017	TRUE	TRUE	TRUE	K00208 enoyl-[acyl-carrier protein] reductase I [EC:1.3.1.9 1.3.1.10] | (RefSeq) enoyl-[acyl-carrier-protein] reductase [NADH], chloroplastic-like (A)	PREDICTED: enoyl-[acyl-carrier-protein]	RecName: Full=Enoyl-[acyl-carrier-protein] reductase [NADH], chloroplastic; Short=ENR; EC=1.3.1.9; AltName: Full=NADH-dependent enoyl-ACP reductase 1; AltName: Full=Protein MOSAIC DEATH 1; Flags: Precursor;	SubName: Full=enoyl-[acyl-carrier-protein] reductase [NADH], chloroplastic-like {ECO:0000313|RefSeq:XP_018825271.1};	Reductases with broad range of substrate specificities	GO:0009507,chloroplast; GO:0009941,chloroplast envelope; GO:0009570,chloroplast stroma; GO:0005835,fatty acid synthase complex; GO:0009579,thylakoid; GO:0005507,copper ion binding; GO:0004318,enoyl-[acyl-carrier-protein] reductase (NADH) activity; GO:0016631,enoyl-[acyl-carrier-protein] reductase activity; GO:0006633,fatty acid biosynthetic process	Trans-2-enoyl-CoA reductase catalytic region
Cluster-10658.86670	TRUE	TRUE	TRUE	K04733 interleukin-1 receptor-associated kinase 4 [EC:2.7.11.1] | (RefSeq) putative serine/threonine-protein kinase (A)	PREDICTED: putative serine/threonine-protein kinase [Daucus carota subsp. sativus]	RecName: Full=Cold-responsive protein kinase 1 {ECO:0000303|PubMed:28344081}; EC=2.7.11.1 {ECO:0000255|PROSITE-ProRule:PRU00159, ECO:0000269|PubMed:28344081};	SubName: Full=putative serine/threonine-protein kinase isoform X1 {ECO:0000313|RefSeq:XP_016475821.1};	Serine/threonine protein kinase	GO:0005886,plasma membrane; GO:0005524,ATP binding; GO:0004674,protein serine/threonine kinase activity; GO:0033160,positive regulation of protein import into nucleus, translocation; GO:0046777,protein autophosphorylation; GO:0009409,response to cold; GO:0050826,response to freezing; GO:0009625,response to insect; GO:0002237,response to molecule of bacterial origin	Haspin like kinase domain
Cluster-10658.101266	TRUE	TRUE	TRUE	K03979 GTPase [EC:3.6.5.-] | (RefSeq) hypothetical protein (A)	PREDICTED: uncharacterized protein LOC108205885 [Daucus carota subsp. sativus]	RecName: Full=Protein TRM32; AltName: Full=TON1-RECRUITING MOTIF protein 32;	SubName: Full=Uncharacterized protein {ECO:0000313|EMBL:KZN05136.1};	--	--	Protein of unknown function (DUF3741)
Cluster-10658.110581	TRUE	TRUE	TRUE	--	PREDICTED: transmembrane protein 53 [Daucus carota subsp. sativus]	--	SubName: Full=Uncharacterized protein {ECO:0000313|EMBL:KZN09950.1};	Uncharacterized conserved protein	--	Eukaryotic protein of unknown function (DUF829)
Cluster-10658.89572	TRUE	TRUE	TRUE	K17535 serine/threonine-protein kinase TNNI3K [EC:2.7.11.1] | (RefSeq) serine/threonine-protein kinase STY46 (A)	PREDICTED: serine/threonine-protein kinase HT1-like [Daucus carota subsp. sativus]	RecName: Full=Serine/threonine-protein kinase HT1; EC=2.7.11.1; AltName: Full=High leaf temperature protein 1;	SubName: Full=Uncharacterized protein {ECO:0000313|EMBL:KZM89056.1};	Tyrosine kinase specific for activated (GTP-bound) p21cdc42Hs	GO:0005737,cytoplasm; GO:0005524,ATP binding; GO:0004672,protein kinase activity; GO:0004674,protein serine/threonine kinase activity; GO:0004871,NA; GO:0035556,intracellular signal transduction	Kinase-like
Cluster-10658.86899	TRUE	TRUE	TRUE	--	--	--	--	--	--	--
Cluster-10658.64539	TRUE	TRUE	TRUE	K07195 exocyst complex component 7 | (RefSeq) exocyst complex component EXO70A1-like (A)	PREDICTED: exocyst complex component EXO70A1-like [Nicotiana attenuata]	RecName: Full=Exocyst complex component EXO70H1 {ECO:0000303|PubMed:16942608}; Short=AtExo70h1 {ECO:0000303|PubMed:16942608}; AltName: Full=Exocyst subunit Exo70 family protein H1 {ECO:0000303|PubMed:16942608};	SubName: Full=Exocyst complex component exo70a1 {ECO:0000313|EMBL:OIT04537.1};	Exocyst component protein and related proteins	GO:0005829,cytosol; GO:0012505,endomembrane system; GO:0000145,exocyst; GO:0016020,membrane; GO:0005634,nucleus; GO:0045335,phagocytic vesicle; GO:0031982,vesicle; GO:0006952,defense response; GO:0006887,exocytosis; GO:1900426,positive regulation of defense response to bacterium; GO:0009617,response to bacterium; GO:0009620,response to fungus; GO:0002237,response to molecule of bacterial origin	Exo70 exocyst complex subunit
Cluster-10658.86913	TRUE	TRUE	TRUE	K08912 light-harvesting complex II chlorophyll a/b binding protein 1 | (RefSeq) chlorophyll a-b binding protein, chloroplastic-like (A)	chlorophyll a/b binding protein of LHCII type I precursor [Panax ginseng]	RecName: Full=Chlorophyll a-b binding protein, chloroplastic; AltName: Allergen=Api g 3; Flags: Precursor;	RecName: Full=Chlorophyll a-b binding protein, chloroplastic {ECO:0000256|RuleBase:RU363080};	--	GO:0009535,chloroplast thylakoid membrane; GO:0016021,integral component of membrane; GO:0009522,photosystem I; GO:0009523,photosystem II; GO:0016168,chlorophyll binding; GO:0046872,metal ion binding; GO:0009765,photosynthesis, light harvesting; GO:0018298,protein-chromophore linkage	Chlorophyll A-B binding protein
Cluster-10658.67420	TRUE	TRUE	TRUE	K01870 isoleucyl-tRNA synthetase [EC:6.1.1.5] | (RefSeq) isoleucine--tRNA ligase, chloroplastic/mitochondrial-like (A)	PREDICTED: dirigent protein 22-like isoform X1 [Daucus carota subsp. sativus]	RecName: Full=Dirigent protein 21; Short=AtDIR21; Flags: Precursor;	RecName: Full=Dirigent protein {ECO:0000256|RuleBase:RU363099};	--	GO:0005618,cell wall; GO:0005576,extracellular region; GO:0016853,isomerase activity	Dirigent-like protein
Cluster-10658.167554	TRUE	TRUE	TRUE	--	--	--	--	--	--	--
Cluster-10658.91904	TRUE	TRUE	TRUE	K01051 pectinesterase [EC:3.1.1.11] | (RefSeq) probable pectinesterase/pectinesterase inhibitor 17 (A)	PREDICTED: probable pectinesterase/pectinesterase inhibitor 17 [Daucus carota subsp. sativus]	RecName: Full=Pectinesterase 2; Short=PE 2; EC=3.1.1.11; AltName: Full=Pectin methylesterase; Flags: Precursor;	RecName: Full=Pectinesterase {ECO:0000256|RuleBase:RU000589}; EC=3.1.1.11 {ECO:0000256|RuleBase:RU000589};	--	GO:0005618,cell wall; GO:0005576,extracellular region; GO:0045330,aspartyl esterase activity; GO:0004857,enzyme inhibitor activity; GO:0030599,pectinesterase activity; GO:0042545,cell wall modification; GO:0045490,pectin catabolic process	Pectinesterase
Cluster-10658.41125	TRUE	TRUE	TRUE	--	--	--	--	--	--	--
Cluster-10658.101878	TRUE	TRUE	TRUE	--	PREDICTED: probable F-box protein At4g22030 [Daucus carota subsp. sativus]	RecName: Full=Probable F-box protein At4g22030;	SubName: Full=Uncharacterized protein {ECO:0000313|EMBL:KZN07329.1};	--	--	Petal formation-expressed
Cluster-10658.94223	TRUE	TRUE	TRUE	K13424 WRKY transcription factor 33 | (RefSeq) probable WRKY transcription factor 33 isoform X1 (A)	PREDICTED: probable WRKY transcription factor 75 [Daucus carota subsp. sativus]	RecName: Full=Probable WRKY transcription factor 75; AltName: Full=WRKY DNA-binding protein 75;	SubName: Full=Uncharacterized protein {ECO:0000313|EMBL:KZM98141.1};	--	GO:0005634,nucleus; GO:0003700,DNA-binding transcription factor activity; GO:0000978,RNA polymerase II proximal promoter sequence-specific DNA binding; GO:0044212,transcription regulatory region DNA binding; GO:0010055,atrichoblast differentiation; GO:0048527,lateral root development; GO:0000122,negative regulation of transcription by RNA polymerase II; GO:0043620,regulation of DNA-templated tran…	WRKY DNA -binding domain
Cluster-10658.98495	TRUE	TRUE	TRUE	K20772 1-aminocyclopropane-1-carboxylate synthase 1/2/6 [EC:4.4.1.14] | (RefSeq) 1-aminocyclopropane-1-carboxylate synthase (A)	PREDICTED: 1-aminocyclopropane-1-carboxylate synthase [Daucus carota subsp. sativus]	RecName: Full=1-aminocyclopropane-1-carboxylate synthase; Short=ACC synthase; EC=4.4.1.14; AltName: Full=S-adenosyl-L-methionine methylthioadenosine-lyase;	SubName: Full=Uncharacterized protein {ECO:0000313|EMBL:KZN07800.1};	1-aminocyclopropane-1-carboxylate synthase, and related proteins	GO:0016847,1-aminocyclopropane-1-carboxylate synthase activity; GO:0030170,pyridoxal phosphate binding; GO:0009693,ethylene biosynthetic process; GO:0009835,fruit ripening	Aminotransferase class I and II
Cluster-10658.135062	TRUE	TRUE	TRUE	K19613 leucine-rich repeat protein SHOC2 | (RefSeq) uncharacterized protein LOC111313103 isoform X1 (A)	PREDICTED: probable WRKY transcription factor 53 [Daucus carota subsp. sativus]	RecName: Full=Probable WRKY transcription factor 41; AltName: Full=WRKY DNA-binding protein 41;	SubName: Full=Uncharacterized protein {ECO:0000313|EMBL:KZN01870.1};	--	GO:0005634,nucleus; GO:0003700,DNA-binding transcription factor activity; GO:0043565,sequence-specific DNA binding; GO:0006351,transcription, DNA-templated	WRKY DNA -binding domain
Cluster-10658.112042	TRUE	TRUE	TRUE	no KO assigned | (RefSeq) crocetin glucosyltransferase, chloroplastic-like (A)	UGTPg37 [Panax ginseng]	RecName: Full=Crocetin glucosyltransferase, chloroplastic; EC=2.4.1.271; AltName: Full=UDP-glucose glucosyltransferase 1; Short=GjUGT1; AltName: Full=UDP-glycosyltransferase 75L6; Flags: Precursor;	RecName: Full=Glycosyltransferase {ECO:0000256|RuleBase:RU362057}; EC=2.4.1.- {ECO:0000256|RuleBase:RU362057};	UDP-glucuronosyl and UDP-glucosyl transferase	GO:0009507,chloroplast; GO:0016758,transferase activity, transferring hexosyl groups; GO:0008152,metabolic process	UDP-glucoronosyl and UDP-glucosyl transferase
Cluster-10658.93126	TRUE	TRUE	TRUE	K20628 expansin | (RefSeq) expansin-B18-like (A)	PREDICTED: expansin-like B1 [Daucus carota subsp. sativus]	RecName: Full=Expansin-like B1; AltName: Full=Expansin-related 1; AltName: Full=OsEXLB1; AltName: Full=OsEXPR1; AltName: Full=OsaEXPb3.1; Flags: Precursor;	SubName: Full=Uncharacterized protein {ECO:0000313|EMBL:KDP45947.1};	--	GO:0005576,extracellular region	Lytic transglycolase
Cluster-10658.31677	TRUE	TRUE	TRUE	--	--	--	--	--	--	--
Cluster-10658.145813	TRUE	TRUE	TRUE	K21953 SH3KBP1-binding protein 1 | (RefSeq) BTB/POZ domain-containing protein At5g41330 (A)	PREDICTED: BTB/POZ domain-containing protein At5g41330-like isoform X1 [Daucus carota subsp. sativus]	RecName: Full=BTB/POZ domain-containing protein At5g41330;	SubName: Full=Uncharacterized protein {ECO:0000313|EMBL:KZN07538.1};	SETA binding protein SB1 and related proteins, contain BTB/POZ domain	GO:0051260,protein homooligomerization; GO:0016567,protein ubiquitination	BTB/POZ domain
Cluster-10658.144509	TRUE	TRUE	TRUE	K09580 protein disulfide-isomerase A1 [EC:5.3.4.1] | (RefSeq) protein disulfide isomerase-like 1-4 (A)	protein disulfide isomerase-like 1-4 [Olea europaea var. sylvestris]	RecName: Full=Protein disulfide isomerase-like 1-3; Short=AtPDIL1-3; EC=5.3.4.1; AltName: Full=Protein disulfide isomerase 1; Short=AtPDI1; AltName: Full=Protein disulfide isomerase-like 2-1; Short=AtPDIL2-1; Flags: Precursor;	RecName: Full=Protein disulfide-isomerase {ECO:0000256|RuleBase:RU361130}; EC=5.3.4.1 {ECO:0000256|RuleBase:RU361130};	Protein disulfide isomerase (prolyl 4-hydroxylase beta subunit)	GO:0009507,chloroplast; GO:0005783,endoplasmic reticulum; GO:0005788,endoplasmic reticulum lumen; GO:0005774,vacuolar membrane; GO:0003756,protein disulfide isomerase activity; GO:0045454,cell redox homeostasis; GO:0006457,protein folding; GO:0034976,response to endoplasmic reticulum stress	Thioredoxin
Cluster-10658.158271	TRUE	TRUE	TRUE	K21867 potassium channel | (RefSeq) potassium channel AKT2/3-like (A)	putative zinc finger, CCHC-type [Helianthus annuus]	RecName: Full=Retrovirus-related Pol polyprotein from transposon TNT 1-94; Includes: RecName: Full=Protease; EC=3.4.23.-; Includes: RecName: Full=Reverse transcriptase; EC=2.7.7.49; Includes: RecName: Full=Endonuclease;	SubName: Full=Putative zinc finger, CCHC-type {ECO:0000313|EMBL:OTG28738.1};	FOG: Transposon-encoded proteins with TYA, reverse transcriptase, integrase domains in various combinations	GO:0004190,aspartic-type endopeptidase activity; GO:0004519,endonuclease activity; GO:0003676,nucleic acid binding; GO:0003964,RNA-directed DNA polymerase activity; GO:0008270,zinc ion binding; GO:0015074,DNA integration	--
Cluster-10658.143671	TRUE	TRUE	TRUE	--	--	--	--	--	--	--
Cluster-10658.115432	TRUE	TRUE	TRUE	K18875 enhanced disease susceptibility 1 protein | (RefSeq) protein EDS1B-like (A)	PREDICTED: protein EDS1B-like [Daucus carota subsp. sativus]	RecName: Full=Protein EDS1 {ECO:0000305}; AltName: Full=Enhanced disease susceptibility 1 {ECO:0000303|PubMed:10077677};	SubName: Full=Uncharacterized protein {ECO:0000313|EMBL:KZM89885.1};	--	GO:0005737,cytoplasm; GO:0005783,endoplasmic reticulum; GO:0005634,nucleus; GO:0016298,lipase activity; GO:0042803,protein homodimerization activity; GO:0010618,aerenchyma formation; GO:0006629,lipid metabolic process; GO:0009626,plant-type hypersensitive response; GO:0010942,positive regulation of cell death; GO:0010310,regulation of hydrogen peroxide metabolic process; GO:0001666,response to hy…	Lipase (class 3)
Cluster-10658.63356	TRUE	TRUE	TRUE	--	unnamed protein product [Coffea canephora]	--	SubName: Full=Uncharacterized protein {ECO:0000313|EMBL:CDP20089.1};	--	--	--
Cluster-10658.113023	TRUE	TRUE	TRUE	K18980 2-methylene-furan-3-one reductase [EC:1.3.1.105] | (RefSeq) 2-methylene-furan-3-one reductase (A)	hypothetical protein POPTR_016G136100v3 [Populus trichocarpa]	RecName: Full=2-methylene-furan-3-one reductase; EC=1.3.1.105 {ECO:0000269|PubMed:16517758}; AltName: Full=Enone oxidoreductase; Short=SlEO; Flags: Precursor;	SubName: Full=Uncharacterized protein {ECO:0000313|EMBL:ABK96279.1};	Zinc-binding oxidoreductase	GO:0009507,chloroplast; GO:0102978,furaneol oxidoreductase activity; GO:0008270,zinc ion binding	Alcohol dehydrogenase GroES-like domain
Cluster-10658.199400	TRUE	TRUE	TRUE	K00025 malate dehydrogenase [EC:1.1.1.37] | (RefSeq) malate dehydrogenase, cytoplasmic-like (A)	PREDICTED: oligopeptide transporter 1-like [Daucus carota subsp. sativus]	RecName: Full=Oligopeptide transporter 5; Short=AtOPT5;	SubName: Full=Uncharacterized protein {ECO:0000313|EMBL:KZM83262.1};	Sexual differentiation process protein ISP4	GO:0005887,integral component of plasma membrane; GO:0016020,membrane; GO:0035673,oligopeptide transmembrane transporter activity; GO:0015031,protein transport	OPT oligopeptide transporter protein
Cluster-10658.112355	TRUE	TRUE	TRUE	K00028 malate dehydrogenase (decarboxylating) [EC:1.1.1.39] | (RefSeq) probable F-box protein At4g22060 (A)	hypothetical protein DCAR_013283 [Daucus carota subsp. sativus]	RecName: Full=F-box protein SKIP23; AltName: Full=SKP1-interacting partner 23;	SubName: Full=Uncharacterized protein {ECO:0000313|EMBL:KZM99355.1};	--	GO:0005694,chromosome; GO:0005737,cytoplasm; GO:0005634,nucleus; GO:0043140,ATP-dependent 3'-5' DNA helicase activity; GO:0003677,DNA binding; GO:0009378,four-way junction helicase activity; GO:0006284,base-excision repair; GO:0032508,DNA duplex unwinding; GO:0006260,DNA replication; GO:0000724,double-strand break repair via homologous recombination; GO:0016567,protein ubiquitination	Protein of unknown function (DUF295)
Cluster-10658.160392	TRUE	TRUE	TRUE	--	PREDICTED: oil body-associated protein 2A-like [Daucus carota subsp. sativus]	RecName: Full=Oil body-associated protein 2B {ECO:0000303|PubMed:24406791};	SubName: Full=Uncharacterized protein {ECO:0000313|EMBL:KZN01925.1};	--	--	Protein of unknown function (DUF1264)
Cluster-10658.189991	TRUE	TRUE	TRUE	--	--	--	--	--	--	--
Cluster-10658.69039	TRUE	TRUE	TRUE	K10859 DNA oxidative demethylase [EC:1.14.11.33] | (RefSeq) alpha-ketoglutarate-dependent dioxygenase alkB homolog 3-like (A)	hypothetical protein VITISV_018984 [Vitis vinifera]	--	SubName: Full=Uncharacterized protein {ECO:0000313|EMBL:CAN79321.1};	FOG: Transposon-encoded proteins with TYA, reverse transcriptase, integrase domains in various combinations	GO:0005634,nucleus; GO:0003676,nucleic acid binding; GO:0008270,zinc ion binding; GO:0015074,DNA integration	gag-polyprotein putative aspartyl protease
Cluster-10658.156104	TRUE	TRUE	TRUE	K19041 E3 ubiquitin-protein ligase RNF38/44 [EC:2.3.2.27] | (RefSeq) RING-H2 finger protein ATL20-like (A)	putative RING-H2 finger protein ATL21A [Olea europaea var. sylvestris]	RecName: Full=Putative RING-H2 finger protein ATL21A; EC=2.3.2.27 {ECO:0000305}; AltName: Full=RING-type E3 ubiquitin transferase ATL21A {ECO:0000305}; Flags: Precursor;	SubName: Full=Uncharacterized protein {ECO:0000313|EMBL:KZM84877.1};	--	GO:0016021,integral component of membrane; GO:0046872,metal ion binding; GO:0030247,polysaccharide binding; GO:0061630,ubiquitin protein ligase activity; GO:0043161,proteasome-mediated ubiquitin-dependent protein catabolic process	Zinc-ribbon, C4HC2 type
Cluster-10658.139598	TRUE	TRUE	TRUE	K00759 adenine phosphoribosyltransferase [EC:2.4.2.7] | (RefSeq) adenine phosphoribosyltransferase 5-like (A)	Pribosyltran domain-containing protein [Cephalotus follicularis]	RecName: Full=Adenine phosphoribosyltransferase 5; Short=AtAPT5; EC=2.4.2.7;	SubName: Full=Pribosyltran domain-containing protein {ECO:0000313|EMBL:GAV75439.1};	Adenine phosphoribosyl transferases	GO:0005829,cytosol; GO:0003999,adenine phosphoribosyltransferase activity; GO:0006168,adenine salvage; GO:0044209,AMP salvage; GO:0006166,purine ribonucleoside salvage	Uracil phosphoribosyltransferase
Cluster-10658.84721	TRUE	TRUE	TRUE	K04733 interleukin-1 receptor-associated kinase 4 [EC:2.7.11.1] | (RefSeq) receptor-like cytosolic serine/threonine-protein kinase RBK2 (A)	hypothetical protein DCAR_002771 [Daucus carota subsp. sativus]	RecName: Full=Receptor-like cytosolic serine/threonine-protein kinase RBK2; EC=2.7.11.1; AltName: Full=Protein ROP BINDING PROTEIN KINASES 2;	SubName: Full=Uncharacterized protein {ECO:0000313|EMBL:KZN10115.1};	Serine/threonine protein kinase	GO:0005737,cytoplasm; GO:0005634,nucleus; GO:0005886,plasma membrane; GO:0005524,ATP binding; GO:0051020,GTPase binding; GO:0004675,transmembrane receptor protein serine/threonine kinase activity; GO:0007166,cell surface receptor signaling pathway; GO:0006468,protein phosphorylation	Fungal protein kinase
Cluster-10658.97593	TRUE	TRUE	TRUE	K10999 cellulose synthase A [EC:2.4.1.12] | (RefSeq) cellulose synthase A catalytic subunit 4 [UDP-forming] isoform X1 (A)	PREDICTED: protein-tyrosine-phosphatase MKP1-like [Daucus carota subsp. sativus]	RecName: Full=Protein-tyrosine-phosphatase MKP1; EC=3.1.3.48; AltName: Full=Mitogen-activated protein kinase phosphatase 1; Short=AtMKP1;	SubName: Full=Uncharacterized protein {ECO:0000313|EMBL:KZM86076.1};	Dual specificity phosphatase	GO:0005829,cytosol; GO:0017017,MAP kinase tyrosine/serine/threonine phosphatase activity; GO:0004725,protein tyrosine phosphatase activity; GO:0006952,defense response; GO:0009651,response to salt stress; GO:0010224,response to UV-B; GO:0010225,response to UV-C	Protein-tyrosine phosphatase
Cluster-10658.135507	TRUE	TRUE	TRUE	K01728 pectate lyase [EC:4.2.2.2] | (RefSeq) LOW QUALITY PROTEIN: putative pectate lyase 2 (A)	PREDICTED: stigma-specific STIG1-like protein 1 [Theobroma cacao]	RecName: Full=Stigma-specific STIG1-like protein 1 {ECO:0000303|PubMed:19279211}; Flags: Precursor;	SubName: Full=Uncharacterized protein {ECO:0000313|EMBL:ERP61678.1};	--	--	Stigma-specific protein, Stig1
Cluster-10658.143136	TRUE	TRUE	TRUE	K18823 soyasaponin III rhamnosyltransferase [EC:2.4.1.273] | (RefSeq) soyasaponin III rhamnosyltransferase (A)	PREDICTED: putative UDP-rhamnose:rhamnosyltransferase 1 [Vitis vinifera]	RecName: Full=Putative UDP-rhamnose:rhamnosyltransferase 1; Short=FaRT1 {ECO:0000303|PubMed:16443693}; EC=2.4.1.- {ECO:0000250|UniProtKB:Q940V3}; AltName: Full=Glycosyltransferase 4; Short=FaGT4 {ECO:0000312|EMBL:AAU09445.1};	SubName: Full=Uncharacterized protein {ECO:0000313|EMBL:CCB62459.1};	UDP-glucuronosyl and UDP-glucosyl transferase	GO:0016021,integral component of membrane; GO:0016758,transferase activity, transferring hexosyl groups; GO:0008152,metabolic process	Cytosol aminopeptidase family, N-terminal domain
Cluster-10658.38343	TRUE	TRUE	TRUE	--	--	--	--	--	--	--
Cluster-10658.44679	TRUE	TRUE	TRUE	--	PREDICTED: UPF0603 protein At1g54780, chloroplastic [Nicotiana attenuata]	RecName: Full=UPF0603 protein At1g54780, chloroplastic; AltName: Full=Thylakoid lumen 18.3 kDa protein; Flags: Precursor;	SubName: Full=UPF0603 protein At1g54780, chloroplastic {ECO:0000313|RefSeq:XP_008455096.1};	--	GO:0009507,chloroplast; GO:0009534,chloroplast thylakoid; GO:0009535,chloroplast thylakoid membrane; GO:0016021,integral component of membrane; GO:0009579,thylakoid; GO:0031977,thylakoid lumen; GO:0003993,acid phosphatase activity; GO:0010206,photosystem II repair	TonB C terminal
Cluster-10658.195764	TRUE	TRUE	TRUE	K03006 DNA-directed RNA polymerase II subunit RPB1 [EC:2.7.7.6] | (RefSeq) LOW QUALITY PROTEIN: DNA-directed RNA polymerase II subunit 1-like (A)	hypothetical protein VITISV_032906 [Vitis vinifera]	RecName: Full=Retrovirus-related Pol polyprotein from transposon TNT 1-94; Includes: RecName: Full=Protease; EC=3.4.23.-; Includes: RecName: Full=Reverse transcriptase; EC=2.7.7.49; Includes: RecName: Full=Endonuclease;	SubName: Full=Uncharacterized protein {ECO:0000313|EMBL:CAN60238.1};	FOG: Transposon-encoded proteins with TYA, reverse transcriptase, integrase domains in various combinations	GO:0004190,aspartic-type endopeptidase activity; GO:0004519,endonuclease activity; GO:0003676,nucleic acid binding; GO:0003964,RNA-directed DNA polymerase activity; GO:0008270,zinc ion binding; GO:0015074,DNA integration	Reverse transcriptase (RNA-dependent DNA polymerase)
Cluster-10658.84585	TRUE	TRUE	TRUE	K09840 9-cis-epoxycarotenoid dioxygenase [EC:1.13.11.51] | (RefSeq) 9-cis-epoxycarotenoid dioxygenase NCED3, chloroplastic (A)	9-cis-epoxycarotenoid dioxygenase NCED3, chloroplastic [Daucus carota subsp. sativus]	RecName: Full=9-cis-epoxycarotenoid dioxygenase NCED1, chloroplastic; EC=1.13.11.51; AltName: Full=PvNCED1; Flags: Precursor;	SubName: Full=Putative 9-cis epoxycarotenoid dioxygenase {ECO:0000313|EMBL:ABB52080.1};	Beta, beta-carotene 15,15'-dioxygenase and related enzymes	GO:0009535,chloroplast thylakoid membrane; GO:0045549,9-cis-epoxycarotenoid dioxygenase activity; GO:0046872,metal ion binding; GO:0009688,abscisic acid biosynthetic process	Retinal pigment epithelial membrane protein
Cluster-10658.148789	TRUE	TRUE	TRUE	K10268 F-box and leucine-rich repeat protein 2/20 | (RefSeq) F-box/LRR-repeat protein 20-like (A)	retrotransposon protein, putative, Ty1-copia subclass [Oryza sativa Japonica Group]	RecName: Full=Retrovirus-related Pol polyprotein from transposon TNT 1-94; Includes: RecName: Full=Protease; EC=3.4.23.-; Includes: RecName: Full=Reverse transcriptase; EC=2.7.7.49; Includes: RecName: Full=Endonuclease;	SubName: Full=Retrotransposon protein, putative, Ty1-copia subclass {ECO:0000313|EMBL:ABA91380.1};	FOG: Transposon-encoded proteins with TYA, reverse transcriptase, integrase domains in various combinations	GO:0004190,aspartic-type endopeptidase activity; GO:0004519,endonuclease activity; GO:0003676,nucleic acid binding; GO:0003964,RNA-directed DNA polymerase activity; GO:0008270,zinc ion binding; GO:0015074,DNA integration	Reverse transcriptase (RNA-dependent DNA polymerase)
Cluster-10658.112027	TRUE	TRUE	TRUE	--	--	--	--	--	--	--
Cluster-10658.13920	TRUE	TRUE	TRUE	K20716 mitogen-activated protein kinase kinase kinase 17/18 | (RefSeq) mitogen-activated protein kinase kinase kinase 18-like (A)	isoform 1s of mitogen-activated protein kinase kinase kinase anp1 [Quercus suber]	RecName: Full=Mitogen-activated protein kinase kinase kinase 18 {ECO:0000303|PubMed:26443375}; EC=2.7.11.25 {ECO:0000255|PROSITE-ProRule:PRU00159, ECO:0000269|PubMed:25680457, ECO:0000269|PubMed:26443375};	SubName: Full=mitogen-activated protein kinase kinase kinase A-like {ECO:0000313|RefSeq:XP_018848461.1};	MEKK and related serine/threonine protein kinases	GO:0005737,cytoplasm; GO:0005634,nucleus; GO:0005524,ATP binding; GO:0004709,MAP kinase kinase kinase activity; GO:0004672,protein kinase activity; GO:0004674,protein serine/threonine kinase activity; GO:0004702,NA; GO:0009738,abscisic acid-activated signaling pathway; GO:0032147,activation of protein kinase activity; GO:1902457,negative regulation of stomatal opening; GO:0009789,positive regulat…	Kinase-like
Cluster-10658.154086	TRUE	TRUE	TRUE	K01191 alpha-mannosidase [EC:3.2.1.24] | (RefSeq) alpha-mannosidase At3g26720-like (A)	PREDICTED: uncharacterized protein LOC108215903 [Daucus carota subsp. sativus]	--	SubName: Full=Uncharacterized protein {ECO:0000313|EMBL:KZM97844.1};	--	--	HMG (high mobility group) box
Cluster-10658.141093	TRUE	TRUE	TRUE	K02183 calmodulin | (RefSeq) probable calcium-binding protein CML45 (A)	EF_hand_5 domain-containing protein [Cephalotus follicularis]	RecName: Full=Probable calcium-binding protein CML45; AltName: Full=Calmodulin-like protein 45;	SubName: Full=EF_hand_5 domain-containing protein {ECO:0000313|EMBL:GAV61710.1};	Calmodulin and related proteins (EF-Hand superfamily)	GO:0005509,calcium ion binding	Tellurite resistance protein TerB
Cluster-10658.99643	TRUE	TRUE	TRUE	K05894 12-oxophytodienoic acid reductase [EC:1.3.1.42] | (RefSeq) 12-oxophytodienoate reductase 2-like (A)	PREDICTED: 12-oxophytodienoate reductase 2-like [Prunus mume]	RecName: Full=12-oxophytodienoate reductase 2; EC=1.3.1.42; AltName: Full=12-oxophytodienoate-10,11-reductase 2; Short=AtOPR2; Short=OPDA-reductase 2;	SubName: Full=12-oxophytodienoate reductase {ECO:0000313|EMBL:JAV45552.1};	NADH:flavin oxidoreductase/12-oxophytodienoate reductase	GO:0005737,cytoplasm; GO:0005622,intracellular; GO:0016629,12-oxophytodienoate reductase activity; GO:0010181,FMN binding; GO:0055114,oxidation-reduction process; GO:0031408,oxylipin biosynthetic process; GO:0009611,response to wounding	NADH:flavin oxidoreductase / NADH oxidase family
Cluster-10658.111279	TRUE	TRUE	TRUE	K10256 omega-6 fatty acid desaturase / acyl-lipid omega-6 desaturase (Delta-12 desaturase) [EC:1.14.19.6 1.14.19.22] | (RefSeq) delta(12)-fatty-acid desaturase FAD2-like (A)	PREDICTED: delta(12)-fatty-acid desaturase FAD2-like [Daucus carota subsp. sativus]	RecName: Full=Delta(12) fatty acid desaturase FAD2 {ECO:0000303|PubMed:11161042}; Short=CoFad2 {ECO:0000303|PubMed:11161042}; EC=1.14.19.- {ECO:0000305};	SubName: Full=Uncharacterized protein {ECO:0000313|EMBL:KZM84923.1};	--	GO:0016021,integral component of membrane; GO:0016717,oxidoreductase activity, acting on paired donors, with oxidation of a pair of donors resulting in the reduction of molecular oxygen to two molecules of water; GO:0006636,unsaturated fatty acid biosynthetic process	Fatty acid desaturase
Cluster-10658.58469	TRUE	TRUE	TRUE	K04733 interleukin-1 receptor-associated kinase 4 [EC:2.7.11.1] | (RefSeq) receptor-like protein kinase ANXUR1 isoform X1 (A)	PREDICTED: heavy metal-associated isoprenylated plant protein 34 isoform X5 [Lupinus angustifolius]	RecName: Full=Heavy metal-associated isoprenylated plant protein 32 {ECO:0000303|PubMed:21072340, ECO:0000303|PubMed:23368984}; Short=AtHIP32 {ECO:0000303|PubMed:21072340, ECO:0000303|PubMed:23368984}; Flags: Precursor;	SubName: Full=Uncharacterized protein {ECO:0000313|EMBL:OIW07127.1};	Copper chaperone	GO:0005618,cell wall; GO:0005737,cytoplasm; GO:0046914,transition metal ion binding; GO:0046916,cellular transition metal ion homeostasis; GO:0030001,metal ion transport	Heavy-metal-associated domain
Cluster-10658.104309	TRUE	TRUE	TRUE	K03868 RING-box protein 1 [EC:2.3.2.32] | (RefSeq) uncharacterized LOC100792815 (A)	PREDICTED: GEM-like protein 5 [Gossypium arboreum]	RecName: Full=GEM-like protein 5;	SubName: Full=Uncharacterized protein {ECO:0000313|EMBL:KJB11714.1};	--	GO:0009793,embryo development ending in seed dormancy; GO:0098755,maintenance of seed dormancy by absisic acid; GO:0010029,regulation of seed germination; GO:0009845,seed germination	GRAM domain
Cluster-10658.69309	TRUE	TRUE	TRUE	--	--	--	--	--	--	--
Cluster-10658.102160	TRUE	TRUE	TRUE	--	hypothetical protein VITISV_041943 [Vitis vinifera]	--	SubName: Full=Uncharacterized protein {ECO:0000313|EMBL:CAN68680.1};	--	--	--
Cluster-10658.118582	TRUE	TRUE	TRUE	K08150 MFS transporter, SP family, solute carrier family 2 (myo-inositol transporter), member 13 | (RefSeq) inositol transporter 1 (A)	PREDICTED: sugar transport protein 13-like [Daucus carota subsp. sativus]	RecName: Full=Sugar transport protein 13; AltName: Full=Hexose transporter 13; AltName: Full=Multicopy suppressor of snf4 deficiency protein 1;	SubName: Full=sugar transport protein 13 {ECO:0000313|RefSeq:XP_016715351.1};	Predicted transporter (major facilitator superfamily)	GO:0016021,integral component of membrane; GO:0005886,plasma membrane; GO:0009506,plasmodesma; GO:0009679,hexose:proton symporter activity; GO:0005358,high-affinity glucose:proton symporter activity; GO:0015145,monosaccharide transmembrane transporter activity; GO:0046323,glucose import; GO:0015749,monosaccharide transmembrane transport; GO:0009737,response to abscisic acid; GO:0009651,response t…	7TM receptor with intracellular HD hydrolase
Cluster-10658.92645	TRUE	TRUE	TRUE	--	PREDICTED: uncharacterized protein LOC108222631 isoform X3 [Daucus carota subsp. sativus]	RecName: Full=F-box protein At5g49610;	SubName: Full=Uncharacterized protein {ECO:0000313|EMBL:KZM91192.1};	--	GO:0016567,protein ubiquitination	--
Cluster-10658.85222	TRUE	TRUE	TRUE	K01537 Ca2+-transporting ATPase [EC:3.6.3.8] | (RefSeq) calcium-transporting ATPase 4, endoplasmic reticulum-type (A)	PREDICTED: calcium-transporting ATPase 4, endoplasmic reticulum-type [Daucus carota subsp. sativus]	RecName: Full=Calcium-transporting ATPase 1, endoplasmic reticulum-type; EC=3.6.3.8;	SubName: Full=Uncharacterized protein {ECO:0000313|EMBL:KZM95624.1};	Ca2+ transporting ATPase	GO:0005783,endoplasmic reticulum; GO:0005789,endoplasmic reticulum membrane; GO:0030176,integral component of endoplasmic reticulum membrane; GO:0005886,plasma membrane; GO:0005774,vacuolar membrane; GO:0005524,ATP binding; GO:0005388,calcium-transporting ATPase activity; GO:0046872,metal ion binding; GO:0006816,calcium ion transport; GO:0046686,response to cadmium ion; GO:0010042,response to man…	haloacid dehalogenase-like hydrolase
Cluster-10658.105691	TRUE	TRUE	TRUE	K11593 eukaryotic translation initiation factor 2C | (RefSeq) protein argonaute 2-like (A)	PREDICTED: protein argonaute 2-like [Daucus carota subsp. sativus]	RecName: Full=Protein argonaute 2;	SubName: Full=Uncharacterized protein {ECO:0000313|EMBL:KZN11660.1};	Translation initiation factor 2C (eIF-2C) and related proteins	GO:0005829,cytosol; GO:0030529,NA; GO:0005634,nucleus; GO:0003729,mRNA binding; GO:0035197,siRNA binding; GO:0042742,defense response to bacterium; GO:0051607,defense response to virus; GO:0031047,gene silencing by RNA; GO:0019048,modulation by virus of host morphology or physiology; GO:0006355,regulation of transcription, DNA-templated; GO:0006417,regulation of translation; GO:0006351,transcript…	Argonaute linker 2 domain
Cluster-10658.98737	TRUE	TRUE	TRUE	K14488 SAUR family protein | (RefSeq) auxin-responsive protein SAUR36 (A)	hypothetical protein CDL12_26378 [Handroanthus impetiginosus]	RecName: Full=Vacuolar-processing enzyme; Short=VPE; EC=3.4.22.-; Flags: Precursor;	SubName: Full=Uncharacterized protein {ECO:0000313|EMBL:PIN01117.1};	--	GO:0008234,cysteine-type peptidase activity	Auxin responsive protein
Cluster-10658.88841	TRUE	TRUE	TRUE	K07025 putative hydrolase of the HAD superfamily | (RefSeq) uncharacterized protein LOC108211575 (A)	PREDICTED: uncharacterized protein LOC108211575 [Daucus carota subsp. sativus]	--	SubName: Full=Uncharacterized protein {ECO:0000313|EMBL:KZN03349.1};	Haloacid dehalogenase-like hydrolase	GO:0016787,hydrolase activity; GO:0008152,metabolic process	Haloacid dehalogenase-like hydrolase
Cluster-10658.108719	TRUE	TRUE	TRUE	--	--	--	--	--	--	--
Cluster-10658.96849	TRUE	TRUE	TRUE	--	PR10-3, partial [Panax ginseng]	RecName: Full=Ribonuclease 2; EC=3.1.-.-;	SubName: Full=PR10-3 {ECO:0000313|EMBL:ADW93868.1}; Flags: Fragment;	--	GO:0005737,cytoplasm; GO:0004519,endonuclease activity; GO:0006952,defense response; GO:0009607,response to biotic stimulus	Pathogenesis-related protein Bet v I family
Cluster-10658.85865	TRUE	TRUE	TRUE	--	PREDICTED: protein LNK2 [Vitis vinifera]	RecName: Full=Protein LNK2 {ECO:0000303|PubMed:23818596}; AltName: Full=Night light-inducible and clock-regulated 2 {ECO:0000303|PubMed:23818596};	SubName: Full=Uncharacterized protein {ECO:0000313|EMBL:CCB58677.1};	--	GO:0005634,nucleus; GO:0006355,regulation of transcription, DNA-templated; GO:0048511,rhythmic process; GO:0006351,transcription, DNA-templated	--
Cluster-10658.108662	TRUE	TRUE	TRUE	K13699 abhydrolase domain-containing protein 5 [EC:2.3.1.51] | (RefSeq) probable 1-acylglycerol-3-phosphate O-acyltransferase (A)	hypothetical protein DCAR_013851 [Daucus carota subsp. sativus]	RecName: Full=Probable 1-acylglycerol-3-phosphate O-acyltransferase; EC=2.3.1.51; AltName: Full=Lipid droplet-binding protein CGI-58 homolog;	SubName: Full=Uncharacterized protein {ECO:0000313|EMBL:KZM98787.1};	Predicted hydrolase/acyltransferase (alpha/beta hydrolase superfamily)	GO:0005737,cytoplasm; GO:0003841,1-acylglycerol-3-phosphate O-acyltransferase activity; GO:0004623,phospholipase A2 activity; GO:0055089,fatty acid homeostasis; GO:0008654,phospholipid biosynthetic process; GO:0055091,phospholipid homeostasis; GO:0070328,triglyceride homeostasis	--
Cluster-10658.78109	TRUE	TRUE	TRUE	--	PREDICTED: uncharacterized protein LOC108227352 isoform X1 [Daucus carota subsp. sativus]	--	SubName: Full=Uncharacterized protein {ECO:0000313|EMBL:KZM90862.1};	--	--	N-terminal C2 in EEIG1 and EHBP1 proteins
Cluster-10658.96739	TRUE	TRUE	TRUE	--	hypothetical protein MANES_18G041800 [Manihot esculenta]	--	SubName: Full=Uncharacterized protein {ECO:0000313|EMBL:OAY22978.1};	--	--	--
Cluster-10658.52957	TRUE	TRUE	TRUE	--	--	--	--	--	--	--
Cluster-10658.152690	TRUE	TRUE	TRUE	K05282 gibberellin-44 dioxygenase [EC:1.14.11.12] | (RefSeq) gibberellin 20 oxidase 1-D-like (A)	PREDICTED: gibberellin 20 oxidase 1-D-like [Daucus carota subsp. sativus]	RecName: Full=Gibberellin 20 oxidase 2; EC=1.14.11.-; AltName: Full=GA 20-oxidase 2; AltName: Full=Gibberellin C-20 oxidase 2;	SubName: Full=Uncharacterized protein {ECO:0000313|EMBL:KZM94897.1};	Iron/ascorbate family oxidoreductases	GO:0045544,gibberellin 20-oxidase activity; GO:0046872,metal ion binding; GO:0009908,flower development; GO:0009740,gibberellic acid mediated signaling pathway; GO:0009686,gibberellin biosynthetic process; GO:0009739,response to gibberellin; GO:0080167,response to karrikin; GO:0009639,response to red or far red light; GO:0009826,unidimensional cell growth	non-haem dioxygenase in morphine synthesis N-terminal
Cluster-10658.44246	TRUE	TRUE	TRUE	K20725 MAP kinase substrate 1 | (RefSeq) VQ motif-containing protein 8, chloroplastic-like (A)	hypothetical protein VITISV_000273 [Vitis vinifera]	RecName: Full=VQ motif-containing protein 8, chloroplastic {ECO:0000303|PubMed:22535423}; Short=AtVQ8 {ECO:0000303|PubMed:22535423}; Flags: Precursor;	SubName: Full=Uncharacterized protein {ECO:0000313|EMBL:CAN73469.1};	--	GO:0009507,chloroplast	VQ motif
Cluster-10658.136912	TRUE	TRUE	TRUE	--	hypothetical protein TSUD_411580 [Trifolium subterraneum]	--	SubName: Full=Uncharacterized protein {ECO:0000313|EMBL:OAY39744.1};	--	--	Thymidylate synthase
Cluster-10658.95442	TRUE	TRUE	TRUE	K14945 protein quaking | (RefSeq) KH domain-containing protein At1g09660/At1g09670 isoform X1 (A)	KH domain-containing protein At1g09660/At1g09670 isoform X1 [Helianthus annuus]	RecName: Full=KH domain-containing protein At1g09660/At1g09670; AltName: Full=Quaking-like protein 5;	SubName: Full=K Homology domain-containing protein {ECO:0000313|EMBL:KVI03049.1};	RNA-binding protein Sam68 and related KH domain proteins	GO:0005634,nucleus; GO:0003723,RNA binding	Homodimerisation region of STAR domain protein
Cluster-10658.87596	TRUE	TRUE	TRUE	K04733 interleukin-1 receptor-associated kinase 4 [EC:2.7.11.1] | (RefSeq) putative receptor protein kinase ZmPK1 (A)	putative receptor protein kinase ZmPK1 [Prunus avium]	RecName: Full=Putative receptor protein kinase ZmPK1; EC=2.7.11.1; Flags: Precursor;	SubName: Full=Uncharacterized protein {ECO:0000313|EMBL:ONI33513.1};	--	GO:0016021,integral component of membrane; GO:0005524,ATP binding; GO:0004674,protein serine/threonine kinase activity; GO:0048544,recognition of pollen	PAN-like domain
Cluster-10658.68053	TRUE	TRUE	TRUE	K02694 photosystem I subunit III | (RefSeq) photosystem I reaction center subunit III, chloroplastic-like (A)	PREDICTED: photosystem I reaction center subunit III, chloroplastic-like [Daucus carota subsp. sativus]	RecName: Full=Photosystem I reaction center subunit III, chloroplastic; AltName: Full=Light-harvesting complex I 17 kDa protein; AltName: Full=PSI-F; Flags: Precursor;	SubName: Full=Uncharacterized protein {ECO:0000313|EnsemblPlants:PGSC0003DMT400054481};	--	GO:0009543,chloroplast thylakoid lumen; GO:0009538,photosystem I reaction center; GO:0015979,photosynthesis	Photosystem I reaction centre subunit III
Cluster-10658.126518	TRUE	TRUE	TRUE	--	uncharacterized protein LOC111012434 [Momordica charantia]	--	SubName: Full=uncharacterized protein LOC104227008 {ECO:0000313|RefSeq:XP_009777438.1};	--	--	Senescence regulator
Cluster-10658.142066	TRUE	TRUE	TRUE	K04123 ent-kaurenoic acid hydroxylase [EC:1.14.13.79] | (RefSeq) hypothetical protein (A)	Cytochrome P450 [Parasponia andersonii]	RecName: Full=Ent-kaurenoic acid oxidase 1; Short=AtKAO1; EC=1.14.13.79; AltName: Full=Cytochrome P450 88A3;	SubName: Full=Ent-kaurenoic acid oxidase 1 {ECO:0000313|EMBL:PHT60588.1};	Cytochrome P450 CYP4/CYP19/CYP26 subfamilies	GO:0005783,endoplasmic reticulum; GO:0005789,endoplasmic reticulum membrane; GO:0016021,integral component of membrane; GO:0051777,ent-kaurenoate oxidase activity; GO:0020037,heme binding; GO:0005506,iron ion binding; GO:0016132,brassinosteroid biosynthetic process; GO:0010268,brassinosteroid homeostasis; GO:0009686,gibberellin biosynthetic process; GO:0007275,multicellular organism development; …	Cytochrome P450
Cluster-10658.183689	TRUE	TRUE	TRUE	K02469 DNA gyrase subunit A [EC:5.99.1.3] | (RefSeq) DNA gyrase subunit A, chloroplastic/mitochondrial-like (A)	PREDICTED: uncharacterized protein LOC105969824 [Erythranthe guttata]	--	SubName: Full=Integrase, catalytic core {ECO:0000313|EMBL:OMO52725.1};	FOG: Transposon-encoded proteins with TYA, reverse transcriptase, integrase domains in various combinations	GO:0003676,nucleic acid binding; GO:0015074,DNA integration	RNase H-like domain found in reverse transcriptase
Cluster-10658.108848	TRUE	TRUE	TRUE	K03676 glutaredoxin 3 | (RefSeq) glutaredoxin-C9 (A)	PREDICTED: glutaredoxin-C9 [Vitis vinifera]	RecName: Full=Glutaredoxin-C9; Short=AtGrxC9; AltName: Full=Protein ROXY 19;	SubName: Full=Uncharacterized protein {ECO:0000313|EMBL:CCB55632.1};	Glutaredoxin and related proteins	GO:0005737,cytoplasm; GO:0005634,nucleus; GO:0009055,electron transfer activity; GO:0015035,protein disulfide oxidoreductase activity; GO:0045454,cell redox homeostasis; GO:0009867,jasmonic acid mediated signaling pathway; GO:0009751,response to salicylic acid; GO:0009863,salicylic acid mediated signaling pathway	Glutaredoxin-like domain (DUF836)
Cluster-10658.85092	TRUE	TRUE	TRUE	K23048 RING finger protein unkempt | (RefSeq) zinc finger CCCH domain-containing protein 20-like (A)	PREDICTED: zinc finger CCCH domain-containing protein 20 [Daucus carota subsp. sativus]	RecName: Full=Zinc finger CCCH domain-containing protein 2; Short=OsC3H2; AltName: Full=Protein DELAY OF THE ONSET OF SENESCENCE; Short=OsDOS;	SubName: Full=Uncharacterized protein {ECO:0000313|EMBL:KZM83947.1};	CCCH-type Zn-finger protein	GO:0005634,nucleus; GO:0003677,DNA binding; GO:0008270,zinc ion binding; GO:0009867,jasmonic acid mediated signaling pathway; GO:0010150,leaf senescence	--
Cluster-10658.126051	TRUE	TRUE	TRUE	K01090 protein phosphatase [EC:3.1.3.16] | (RefSeq) serine/threonine-protein phosphatase BSL1 homolog (A)	serine/threonine-protein phosphatase BSL3 [Herrania umbratica]	RecName: Full=Serine/threonine-protein phosphatase BSL3; EC=3.1.3.16; AltName: Full=BSU1-like protein 3;	RecName: Full=Serine/threonine-protein phosphatase {ECO:0000256|PIRNR:PIRNR036363}; EC=3.1.3.16 {ECO:0000256|PIRNR:PIRNR036363};	Kelch repeat-containing proteins	GO:0005829,cytosol; GO:0005634,nucleus; GO:0005886,plasma membrane; GO:0046872,metal ion binding; GO:0004721,phosphoprotein phosphatase activity; GO:0009742,brassinosteroid mediated signaling pathway	Serine-threonine protein phosphatase N-terminal domain
Cluster-10658.88726	TRUE	TRUE	TRUE	K03283 heat shock 70kDa protein 1/2/6/8 | (RefSeq) probable mediator of RNA polymerase II transcription subunit 37c (A)	hypothetical protein DCAR_005980 [Daucus carota subsp. sativus]	RecName: Full=Probable mediator of RNA polymerase II transcription subunit 37c; AltName: Full=Heat shock 70 kDa protein 4; AltName: Full=Heat shock cognate 70 kDa protein 4; AltName: Full=Heat shock cognate protein 70-4; Short=AtHsc70-4; AltName: Full=Heat shock protein 70-4; Short=AtHsp70-4;	SubName: Full=Uncharacterized protein {ECO:0000313|EMBL:KZN05143.1};	Molecular chaperones HSP70/HSC70, HSP70 superfamily	GO:0048046,apoplast; GO:0005618,cell wall; GO:0005829,cytosol; GO:0005794,Golgi apparatus; GO:0005739,mitochondrion; GO:0005634,nucleus; GO:0005886,plasma membrane; GO:0005774,vacuolar membrane; GO:0005524,ATP binding; GO:0031625,ubiquitin protein ligase binding; GO:0016567,protein ubiquitination; GO:0006355,regulation of transcription, DNA-templated; GO:0009617,response to bacterium; GO:0046686,…	Hsp70 protein
Cluster-10658.146142	TRUE	TRUE	TRUE	--	--	--	--	--	--	--
Cluster-10658.119077	TRUE	TRUE	TRUE	K11153 retinol dehydrogenase 12 [EC:1.1.1.300] | (RefSeq) short-chain dehydrogenase TIC 32, chloroplastic-like (A)	PREDICTED: short-chain dehydrogenase TIC 32, chloroplastic-like [Daucus carota subsp. sativus]	RecName: Full=Short-chain dehydrogenase TIC 32, chloroplastic; EC=1.1.1.-; AltName: Full=Translocon at the inner envelope membrane of chloroplasts 32; Short=PsTIC32;	SubName: Full=Uncharacterized protein {ECO:0000313|EMBL:KZN02987.1};	Dehydrogenases with different specificities (related to short-chain alcohol dehydrogenases)	GO:0009706,chloroplast inner membrane; GO:0005516,calmodulin binding; GO:0016491,oxidoreductase activity; GO:0015031,protein transport	short chain dehydrogenase
Cluster-10658.87865	TRUE	TRUE	TRUE	K09872 aquaporin PIP | (RefSeq) aquaporin PIP2-2-like (A)	PREDICTED: aquaporin PIP2-2-like [Daucus carota subsp. sativus]	RecName: Full=Aquaporin PIP2-2; AltName: Full=Plasma membrane intrinsic protein 2-2; Short=AtPIP2;2; AltName: Full=Plasma membrane intrinsic protein 2b; Short=PIP2b; AltName: Full=TMP2b;	SubName: Full=Uncharacterized protein {ECO:0000313|EMBL:KZN05225.1};	Aquaporin (major intrinsic protein family)	GO:0009507,chloroplast; GO:0005887,integral component of plasma membrane; GO:0005886,plasma membrane; GO:0009506,plasmodesma; GO:0003729,mRNA binding; GO:0015250,water channel activity; GO:0034220,ion transmembrane transport; GO:0009737,response to abscisic acid; GO:0009414,response to water deprivation; GO:0006833,water transport	Major intrinsic protein
Cluster-10658.97627	TRUE	TRUE	TRUE	K14972 PAX-interacting protein 1 | (RefSeq) hypothetical protein (A)	putative transcription cofactor [Corchorus capsularis]	RecName: Full=Mediator of RNA polymerase II transcription subunit 15a;	SubName: Full=Putative transcription cofactor {ECO:0000313|EMBL:OMO54456.1};	--	GO:0016592,mediator complex; GO:0005634,nucleus; GO:0031490,chromatin DNA binding; GO:0003713,transcription coactivator activity; GO:0045723,positive regulation of fatty acid biosynthetic process; GO:0006355,regulation of transcription, DNA-templated; GO:0009751,response to salicylic acid; GO:0006351,transcription, DNA-templated	--
Cluster-10658.110722	TRUE	TRUE	TRUE	K22395 cinnamyl-alcohol dehydrogenase [EC:1.1.1.195] | (RefSeq) tetrahydrocannabinolic acid synthase-like (A)	PREDICTED: tetrahydrocannabinolic acid synthase-like [Daucus carota subsp. sativus]	RecName: Full=Berberine bridge enzyme-like 8 {ECO:0000303|PubMed:26037923}; Short=AtBBE-like 8 {ECO:0000303|PubMed:26037923}; EC=1.1.1.- {ECO:0000250|UniProtKB:O64743}; Flags: Precursor;	SubName: Full=Uncharacterized protein {ECO:0000313|EMBL:KZM84195.1};	--	GO:0005618,cell wall; GO:0005576,extracellular region; GO:0050660,flavin adenine dinucleotide binding; GO:0016614,oxidoreductase activity, acting on CH-OH group of donors	Berberine and berberine like
Cluster-10658.30986	TRUE	TRUE	TRUE	--	PREDICTED: uncharacterized protein LOC18592178 [Theobroma cacao]	--	SubName: Full=Uncharacterized protein {ECO:0000313|EMBL:EOY16031.1};	--	--	--
Cluster-10658.117482	TRUE	TRUE	TRUE	--	--	--	--	--	--	--
Cluster-10658.66895	TRUE	TRUE	TRUE	--	--	--	--	--	--	--
Cluster-10658.118997	TRUE	TRUE	TRUE	--	PREDICTED: uncharacterized protein LOC108212498 [Daucus carota subsp. sativus]	--	SubName: Full=Uncharacterized protein {ECO:0000313|EMBL:KZN01952.1};	--	--	--
Cluster-10658.82543	TRUE	TRUE	TRUE	K20716 mitogen-activated protein kinase kinase kinase 17/18 | (RefSeq) mitogen-activated protein kinase kinase kinase 18 (A)	PREDICTED: mitogen-activated protein kinase kinase kinase A-like [Daucus carota subsp. sativus]	RecName: Full=Mitogen-activated protein kinase kinase kinase 18 {ECO:0000303|PubMed:26443375}; EC=2.7.11.25 {ECO:0000255|PROSITE-ProRule:PRU00159, ECO:0000269|PubMed:25680457, ECO:0000269|PubMed:26443375};	SubName: Full=Uncharacterized protein {ECO:0000313|EMBL:KZM90052.1};	MEKK and related serine/threonine protein kinases	GO:0005737,cytoplasm; GO:0005634,nucleus; GO:0005524,ATP binding; GO:0004709,MAP kinase kinase kinase activity; GO:0004672,protein kinase activity; GO:0004674,protein serine/threonine kinase activity; GO:0004702,NA; GO:0009738,abscisic acid-activated signaling pathway; GO:0032147,activation of protein kinase activity; GO:1902457,negative regulation of stomatal opening; GO:0009789,positive regulat…	Fungal protein kinase
Cluster-10658.94900	TRUE	TRUE	TRUE	K10256 omega-6 fatty acid desaturase / acyl-lipid omega-6 desaturase (Delta-12 desaturase) [EC:1.14.19.6 1.14.19.22] | (RefSeq) delta(12)-fatty-acid desaturase FAD2-like (A)	PREDICTED: delta(12)-fatty-acid desaturase FAD2-like [Daucus carota subsp. sativus]	RecName: Full=Delta(12) fatty acid desaturase FAD2 {ECO:0000303|PubMed:11161042}; Short=CoFad2 {ECO:0000303|PubMed:11161042}; EC=1.14.19.- {ECO:0000305};	SubName: Full=Uncharacterized protein {ECO:0000313|EMBL:KZM99090.1};	--	GO:0016021,integral component of membrane; GO:0016717,oxidoreductase activity, acting on paired donors, with oxidation of a pair of donors resulting in the reduction of molecular oxygen to two molecules of water; GO:0006636,unsaturated fatty acid biosynthetic process	Fatty acid desaturase
Cluster-10658.99058	TRUE	TRUE	TRUE	--	PREDICTED: uncharacterized protein LOC108197747 [Daucus carota subsp. sativus]	--	SubName: Full=Uncharacterized protein {ECO:0000313|EMBL:CDP06536.1};	--	--	PAR1 protein
Cluster-10658.116372	TRUE	TRUE	TRUE	--	PREDICTED: uncharacterized protein LOC109242456 [Nicotiana attenuata]	--	SubName: Full=uncharacterized protein LOC107860829 {ECO:0000313|RefSeq:XP_016561803.1};	--	--	--
Cluster-10658.139622	TRUE	TRUE	TRUE	--	PREDICTED: uncharacterized protein LOC108211540 [Daucus carota subsp. sativus]	--	SubName: Full=Uncharacterized protein {ECO:0000313|EMBL:KZN01097.1};	--	--	Domain of unknown function (DUF4228)
Cluster-10658.136910	TRUE	TRUE	TRUE	--	PREDICTED: uncharacterized protein LOC104590587 isoform X2 [Nelumbo nucifera]	--	SubName: Full=uncharacterized protein LOC104590587 isoform X2 {ECO:0000313|RefSeq:XP_010247631.1};	--	--	--
Cluster-10658.86625	TRUE	TRUE	TRUE	K19893 glucan endo-1,3-beta-glucosidase 5/6 [EC:3.2.1.39] | (RefSeq) hypothetical protein (A)	beta-1,3-glucanase [Vitis riparia]	RecName: Full=Glucan endo-1,3-beta-glucosidase, basic isoform; EC=3.2.1.39; AltName: Full=(1->3)-beta-glucan endohydrolase; Short=(1->3)-beta-glucanase; AltName: Full=Beta-1,3-endoglucanase; AltName: Full=PpGns1; Flags: Precursor;	SubName: Full=Beta-1,3-glucanase {ECO:0000313|EMBL:ACD45060.1};	--	GO:0042973,glucan endo-1,3-beta-D-glucosidase activity; GO:0005975,carbohydrate metabolic process; GO:0006952,defense response; GO:0009607,response to biotic stimulus	Glycosyl hydrolases family 17
Cluster-10658.135966	TRUE	TRUE	TRUE	--	Hop-interacting protein THI031 [Solanum lycopersicum]	--	SubName: Full=Hop-interacting protein THI031 {ECO:0000313|EMBL:AEW69794.1, ECO:0000313|EnsemblPlants:Solyc02g093710.1.1};	--	--	--
Cluster-10658.107361	TRUE	TRUE	TRUE	K08150 MFS transporter, SP family, solute carrier family 2 (myo-inositol transporter), member 13 | (RefSeq) inositol transporter 1 (A)	PREDICTED: sugar transport protein 13-like [Daucus carota subsp. sativus]	RecName: Full=Sugar transport protein 13; AltName: Full=Hexose transporter 13; AltName: Full=Multicopy suppressor of snf4 deficiency protein 1;	SubName: Full=sugar transport protein 13 {ECO:0000313|RefSeq:XP_016715351.1};	Predicted transporter (major facilitator superfamily)	GO:0016021,integral component of membrane; GO:0005886,plasma membrane; GO:0009506,plasmodesma; GO:0009679,hexose:proton symporter activity; GO:0005358,high-affinity glucose:proton symporter activity; GO:0015145,monosaccharide transmembrane transporter activity; GO:0046323,glucose import; GO:0015749,monosaccharide transmembrane transport; GO:0009737,response to abscisic acid; GO:0009651,response t…	Sugar (and other) transporter
Cluster-10658.123761	TRUE	TRUE	TRUE	--	--	--	--	--	--	--
Cluster-10658.125912	TRUE	TRUE	TRUE	K07195 exocyst complex component 7 | (RefSeq) exocyst complex component EXO70A1-like (A)	exocyst complex component EXO70A1-like [Sesamum indicum]	RecName: Full=Exocyst complex component EXO70H1 {ECO:0000303|PubMed:16942608}; Short=AtExo70h1 {ECO:0000303|PubMed:16942608}; AltName: Full=Exocyst subunit Exo70 family protein H1 {ECO:0000303|PubMed:16942608};	SubName: Full=Exocyst complex component exo70a1 {ECO:0000313|EMBL:OIT07078.1};	Exocyst component protein and related proteins	GO:0005829,cytosol; GO:0012505,endomembrane system; GO:0000145,exocyst; GO:0016020,membrane; GO:0005634,nucleus; GO:0045335,phagocytic vesicle; GO:0031982,vesicle; GO:0006952,defense response; GO:0006887,exocytosis; GO:1900426,positive regulation of defense response to bacterium; GO:0009617,response to bacterium; GO:0009620,response to fungus; GO:0002237,response to molecule of bacterial origin	Exo70 exocyst complex subunit
Cluster-10658.136463	TRUE	TRUE	TRUE	--	PREDICTED: VQ motif-containing protein 22-like [Daucus carota subsp. sativus]	--	SubName: Full=Uncharacterized protein {ECO:0000313|EMBL:KZN08221.1};	--	--	VQ motif
Cluster-10658.174798	TRUE	TRUE	TRUE	K02930 large subunit ribosomal protein L4e | (RefSeq) 60S ribosomal protein L4-like (A)	PREDICTED: protein MARD1 [Nelumbo nucifera]	RecName: Full=Protein MARD1 {ECO:0000303|PubMed:15159630}; AltName: Full=Mediator of ABA-regulated dormancy1 {ECO:0000303|PubMed:15159630}; AltName: Full=Senescence-associated protein SAG102 {ECO:0000303|PubMed:11402199};	SubName: Full=protein MARD1 {ECO:0000313|RefSeq:XP_010259075.1};	--	GO:0010494,cytoplasmic stress granule; GO:0000932,P-body; GO:0046872,metal ion binding; GO:0009737,response to abscisic acid; GO:0010162,seed dormancy process	--
Cluster-10658.107739	TRUE	TRUE	TRUE	K18211 synaptosomal-associated protein 25 | (RefSeq) SNAP25 homologous protein SNAP33-like (A)	PREDICTED: SNAP25 homologous protein SNAP33-like [Nicotiana tomentosiformis]	RecName: Full=SNAP25 homologous protein SNAP33 {ECO:0000303|PubMed:12746539}; Short=AtSNAP33 {ECO:0000303|PubMed:12746539}; AltName: Full=Snap25a {ECO:0000303|PubMed:11718726}; AltName: Full=Synaptosomal-associated protein SNAP25-like 1 {ECO:0000303|PubMed:11718726}; Short=SNAP-25-like protein 1 {ECO:0000303|PubMed:11718726};	SubName: Full=SNAP25 homologous protein SNAP33 {ECO:0000313|RefSeq:XP_016438590.1};	SNAP-25 (synaptosome-associated protein) component of SNARE complex	GO:0009504,cell plate; GO:0009507,chloroplast; GO:0016021,integral component of membrane; GO:0005886,plasma membrane; GO:0005484,SNAP receptor activity; GO:0000911,cytokinesis by cell plate formation; GO:0061025,membrane fusion; GO:0015031,protein transport; GO:0009737,response to abscisic acid; GO:0009612,response to mechanical stimulus; GO:0051707,response to other organism; GO:0016192,vesicle-…	--
Cluster-10658.76161	TRUE	TRUE	TRUE	K22395 cinnamyl-alcohol dehydrogenase [EC:1.1.1.195] | (RefSeq) tetrahydrocannabinolic acid synthase-like (A)	hypothetical protein DCAR_003319 [Daucus carota subsp. sativus]	RecName: Full=Berberine bridge enzyme-like 15 {ECO:0000303|PubMed:26037923}; Short=AtBBE-like 15 {ECO:0000303|PubMed:26037923}; EC=1.1.1.194 {ECO:0000269|PubMed:26037923}; EC=1.1.1.195 {ECO:0000269|PubMed:26037923}; AltName: Full=Protein EMBRYO SAC DEVELOPMENT ARREST 28 {ECO:0000303|PubMed:15634699}; AltName: Full=Protein MATERNAL EFFECT EMBRYO ARREST 23 {ECO:0000303|PubMed:15634699}; Flags: Prec…	SubName: Full=Uncharacterized protein {ECO:0000313|EMBL:KZN10663.1};	--	GO:0005618,cell wall; GO:0005576,extracellular region; GO:0009506,plasmodesma; GO:0045551,cinnamyl-alcohol dehydrogenase activity; GO:0050268,coniferyl-alcohol dehydrogenase activity; GO:0050660,flavin adenine dinucleotide binding; GO:0052747,sinapyl alcohol dehydrogenase activity; GO:0009793,embryo development ending in seed dormancy; GO:0010197,polar nucleus fusion	Berberine and berberine like
Cluster-10658.75366	TRUE	TRUE	TRUE	K13448 calcium-binding protein CML | (RefSeq) probable calcium-binding protein CML17 (A)	unnamed protein product [Coffea canephora]	RecName: Full=Probable calcium-binding protein CML17; AltName: Full=Calmodulin-like protein 17;	SubName: Full=Uncharacterized protein {ECO:0000313|EMBL:CDP18538.1};	Calmodulin and related proteins (EF-Hand superfamily)	GO:0005509,calcium ion binding	EF hand
Cluster-10658.6914	TRUE	TRUE	TRUE	--	hypothetical protein DCAR_009827 [Daucus carota subsp. sativus]	--	SubName: Full=Uncharacterized protein {ECO:0000313|EMBL:KZN01073.1};	--	GO:0016021,integral component of membrane; GO:0008270,zinc ion binding	GRF zinc finger
Cluster-10658.70529	TRUE	TRUE	TRUE	K03189 urease accessory protein | (RefSeq) uncharacterized LOC103435130 (A)	Cytochrome b561 and DOMON domain-containing protein [Trema orientalis]	RecName: Full=Cytochrome b561 and DOMON domain-containing protein At3g25290; AltName: Full=Protein b561A.tha3; Flags: Precursor;	SubName: Full=Uncharacterized protein {ECO:0000313|EMBL:KCW58007.1};	Predicted membrane protein, contains DoH and Cytochrome b-561/ferric reductase transmembrane domains	GO:0016021,integral component of membrane; GO:0005886,plasma membrane; GO:0009506,plasmodesma; GO:0046872,metal ion binding; GO:0055114,oxidation-reduction process	Eukaryotic cytochrome b561
Cluster-10658.85011	TRUE	TRUE	TRUE	K22395 cinnamyl-alcohol dehydrogenase [EC:1.1.1.195] | (RefSeq) tetrahydrocannabinolic acid synthase-like (A)	PREDICTED: tetrahydrocannabinolic acid synthase-like [Daucus carota subsp. sativus]	RecName: Full=Berberine bridge enzyme-like 8 {ECO:0000303|PubMed:26037923}; Short=AtBBE-like 8 {ECO:0000303|PubMed:26037923}; EC=1.1.1.- {ECO:0000250|UniProtKB:O64743}; Flags: Precursor;	SubName: Full=Uncharacterized protein {ECO:0000313|EMBL:KZN03653.1};	--	GO:0005618,cell wall; GO:0005576,extracellular region; GO:0050660,flavin adenine dinucleotide binding; GO:0016614,oxidoreductase activity, acting on CH-OH group of donors	--
Cluster-10658.109872	TRUE	TRUE	TRUE	--	specific abundant protein 1 [Panax ginseng]	--	SubName: Full=Specific abundant protein 1 {ECO:0000313|EMBL:AAX40470.1};	--	--	--
Cluster-10658.74115	TRUE	TRUE	TRUE	K15015 solute carrier family 32 (vesicular inhibitory amino acid transporter) | (RefSeq) lysine histidine transporter-like 2 (A)	lysine histidine transporter [Panax ginseng]	RecName: Full=Lysine histidine transporter 1;	SubName: Full=Lysine histidine transporter {ECO:0000313|EMBL:AGN03890.1};	Amino acid transporters	GO:0016021,integral component of membrane; GO:0005886,plasma membrane; GO:0015171,amino acid transmembrane transporter activity; GO:0015293,symporter activity; GO:0043090,amino acid import; GO:0080167,response to karrikin	Tryptophan/tyrosine permease family
Cluster-10658.56661	TRUE	TRUE	TRUE	K22698 protein SEY1 [EC:3.6.5.-] | (RefSeq) probable LRR receptor-like serine/threonine-protein kinase At1g56130 (A)	PREDICTED: probable LRR receptor-like serine/threonine-protein kinase At1g56130 [Daucus carota subsp. sativus]	RecName: Full=Probable LRR receptor-like serine/threonine-protein kinase At1g56130; EC=2.7.11.1; Flags: Precursor;	SubName: Full=Uncharacterized protein {ECO:0000313|EMBL:KZN08872.1};	--	GO:0016021,integral component of membrane; GO:0005886,plasma membrane; GO:0005524,ATP binding; GO:0004674,protein serine/threonine kinase activity	Leucine Rich repeat
Cluster-10658.107665	TRUE	TRUE	TRUE	K15015 solute carrier family 32 (vesicular inhibitory amino acid transporter) | (RefSeq) lysine histidine transporter-like 2 (A)	lysine histidine transporter [Panax ginseng]	RecName: Full=Lysine histidine transporter 1;	SubName: Full=Lysine histidine transporter {ECO:0000313|EMBL:AGN03890.1};	Amino acid transporters	GO:0016021,integral component of membrane; GO:0005886,plasma membrane; GO:0015171,amino acid transmembrane transporter activity; GO:0015293,symporter activity; GO:0043090,amino acid import; GO:0080167,response to karrikin	Tryptophan/tyrosine permease family
Cluster-10658.124206	TRUE	TRUE	TRUE	K01805 xylose isomerase [EC:5.3.1.5] | (RefSeq) xylose isomerase (A)	PREDICTED: putative lipase ROG1 isoform X1 [Daucus carota subsp. sativus]	--	SubName: Full=Uncharacterized protein {ECO:0000313|EMBL:KZM92594.1};	Predicted alpha/beta hydrolase	--	Putative serine esterase (DUF676)
Cluster-10658.110286	TRUE	TRUE	TRUE	K04733 interleukin-1 receptor-associated kinase 4 [EC:2.7.11.1] | (RefSeq) proline-rich receptor-like protein kinase PERK3 isoform X1 (A)	PREDICTED: vesicle-associated protein 1-3-like [Malus domestica]	RecName: Full=Vesicle-associated protein 1-3; AltName: Full=Plant VAP homolog 13; Short=AtPVA13; AltName: Full=VAMP-associated protein 1-3; Contains: RecName: Full=Vesicle-associated protein 1-3, N-terminally processed;	SubName: Full=Uncharacterized protein {ECO:0000313|EMBL:EMJ19492.1};	VAMP-associated protein involved in inositol metabolism	GO:0005783,endoplasmic reticulum; GO:0005789,endoplasmic reticulum membrane; GO:0016021,integral component of membrane	Interleukin-13 receptor subunit alpha Ig-like domain
Cluster-10658.135448	TRUE	TRUE	TRUE	K21396 ATP-binding cassette, subfamily G (WHITE), eye pigment precursor transporter | (RefSeq) ABC transporter G family member 7 (A)	pleiotropic drug resistance transporter 1 [Panax ginseng]	RecName: Full=Pleiotropic drug resistance protein 1; AltName: Full=NtPDR1;	SubName: Full=Pleiotropic drug resistance transporter 1 {ECO:0000313|EMBL:AGT28053.1};	Pleiotropic drug resistance proteins (PDR1-15), ABC superfamily	GO:0016021,integral component of membrane; GO:0005524,ATP binding; GO:0016887,ATPase activity	AAA domain, putative AbiEii toxin, Type IV TA system
Cluster-10658.108347	TRUE	TRUE	TRUE	K00555 tRNA (guanine26-N2/guanine27-N2)-dimethyltransferase [EC:2.1.1.215 2.1.1.216] | (RefSeq) probable tRNA (guanine(26)-N(2))-dimethyltransferase 2 (A)	PREDICTED: probable tRNA (guanine(26)-N(2))-dimethyltransferase 2 [Daucus carota subsp. sativus]	RecName: Full=Probable tRNA (guanine(26)-N(2))-dimethyltransferase 2; EC=2.1.1.216; AltName: Full=tRNA 2,2-dimethylguanosine-26 methyltransferase 2; AltName: Full=tRNA(guanine-26,N(2)-N(2)) methyltransferase 2; AltName: Full=tRNA(m(2,2)G26)dimethyltransferase 2;	SubName: Full=Uncharacterized protein {ECO:0000313|EMBL:KZM88375.1};	tRNA methyltransferase	GO:0005739,mitochondrion; GO:0005634,nucleus; GO:0004809,tRNA (guanine-N2-)-methyltransferase activity; GO:0000049,tRNA binding; GO:0002940,tRNA N2-guanine methylation	Methyltransferase domain
Cluster-10658.137398	TRUE	TRUE	TRUE	K13457 disease resistance protein RPM1 | (RefSeq) disease resistance protein RPM1 (A)	PREDICTED: disease resistance protein RPM1 [Daucus carota subsp. sativus]	RecName: Full=Disease resistance protein RPM1; AltName: Full=Resistance to Pseudomonas syringae protein 3;	SubName: Full=Uncharacterized protein {ECO:0000313|EMBL:KZM96433.1};	Apoptotic ATPase	GO:0012505,endomembrane system; GO:0019897,extrinsic component of plasma membrane; GO:0005886,plasma membrane; GO:0043531,ADP binding; GO:0005524,ATP binding; GO:0000166,nucleotide binding; GO:0009626,plant-type hypersensitive response; GO:0007165,signal transduction	AAA ATPase domain
Cluster-10658.66605	TRUE	TRUE	TRUE	K04730 interleukin-1 receptor-associated kinase 1 [EC:2.7.11.1] | (RefSeq) serine/threonine-protein kinase-like protein ACR4 (A)	PREDICTED: serine/threonine-protein kinase-like protein CCR1 [Daucus carota subsp. sativus]	RecName: Full=Serine/threonine-protein kinase-like protein CCR1; EC=2.7.11.1; AltName: Full=Protein CRINKLY 4 RELATED 1; Short=AtCRR1; Flags: Precursor;	SubName: Full=Uncharacterized protein {ECO:0000313|EMBL:KZM91798.1};	--	GO:0016021,integral component of membrane; GO:0005886,plasma membrane; GO:0005524,ATP binding; GO:0042803,protein homodimerization activity; GO:0004672,protein kinase activity; GO:0004675,transmembrane receptor protein serine/threonine kinase activity; GO:0007166,cell surface receptor signaling pathway	Phosphotransferase enzyme family
Cluster-10658.46757	TRUE	TRUE	TRUE	K19477 cGMP-dependent protein kinase 2 [EC:2.7.11.12] | (RefSeq) protein phosphatase 2C and cyclic nucleotide-binding/kinase domain-containing protein isoform X1 (A)	PREDICTED: probable protein phosphatase 2C 35 [Daucus carota subsp. sativus]	RecName: Full=Probable protein phosphatase 2C 35; Short=AtPP2C35; EC=3.1.3.16;	SubName: Full=Uncharacterized protein {ECO:0000313|EMBL:CDO98959.1};	Serine/threonine protein phosphatase	GO:0005886,plasma membrane; GO:0046872,metal ion binding; GO:0004721,phosphoprotein phosphatase activity	Stage II sporulation protein E (SpoIIE)
Cluster-10658.163528	TRUE	TRUE	TRUE	K14638 solute carrier family 15 (peptide/histidine transporter), member 3/4 | (RefSeq) protein NRT1/ PTR FAMILY 4.3-like (A)	PREDICTED: protein NRT1/ PTR FAMILY 4.3-like [Daucus carota subsp. sativus]	RecName: Full=Protein NRT1/ PTR FAMILY 4.3; Short=AtNPF4.3; AltName: Full=Nitrate transporter 1.14;	SubName: Full=Uncharacterized protein {ECO:0000313|EMBL:KZN09070.1};	H+/oligopeptide symporter	GO:0016021,integral component of membrane; GO:0005886,plasma membrane; GO:0022857,transmembrane transporter activity; GO:0006857,oligopeptide transport; GO:0009624,response to nematode	POT family
Cluster-10658.92642	TRUE	TRUE	TRUE	--	PREDICTED: uncharacterized protein YwbO [Daucus carota subsp. sativus]	--	SubName: Full=Uncharacterized protein {ECO:0000313|EMBL:KZM91210.1};	--	GO:0015035,protein disulfide oxidoreductase activity	Thioredoxin domain
Cluster-10658.112784	TRUE	TRUE	TRUE	K12450 UDP-glucose 4,6-dehydratase [EC:4.2.1.76] | (RefSeq) trifunctional UDP-glucose 4,6-dehydratase/UDP-4-keto-6-deoxy-D-glucose 3,5-epimerase/UDP-4-keto-L-rhamnose-reductase RHM1 (A)	PREDICTED: trifunctional UDP-glucose 4,6-dehydratase/UDP-4-keto-6-deoxy-D-glucose 3,5-epimerase/UDP-4-keto-L-rhamnose-reductase RHM1 [Daucus carota subsp. sativus]	RecName: Full=Trifunctional UDP-glucose 4,6-dehydratase/UDP-4-keto-6-deoxy-D-glucose 3,5-epimerase/UDP-4-keto-L-rhamnose-reductase RHM1 {ECO:0000305|PubMed:17190829}; AltName: Full=Protein REPRESSOR OF LRX1 1 {ECO:0000303|PubMed:18567791}; AltName: Full=Rhamnose biosynthetic enzyme 1; Short=AtRHM1; Includes: RecName: Full=UDP-glucose 4,6-dehydratase {ECO:0000305|PubMed:17190829}; EC=4.2.1.76 {ECO…	SubName: Full=Uncharacterized protein {ECO:0000313|EMBL:KZM98856.1};	Putative NAD+-dependent epimerases	GO:0005829,cytosol; GO:0009506,plasmodesma; GO:0008460,dTDP-glucose 4,6-dehydratase activity; GO:0016853,isomerase activity; GO:0016491,oxidoreductase activity; GO:0050377,UDP-glucose 4,6-dehydratase activity; GO:0010280,UDP-L-rhamnose synthase activity; GO:0010315,auxin efflux; GO:0030154,cell differentiation; GO:0071555,cell wall organization; GO:0051555,flavonol biosynthetic process; GO:004212…	NAD(P)H-binding
Cluster-10658.155257	TRUE	TRUE	TRUE	K00901 diacylglycerol kinase (ATP) [EC:2.7.1.107] | (RefSeq) diacylglycerol kinase 5-like (A)	diacylglycerol kinase 5-like [Olea europaea var. sylvestris]	RecName: Full=Diacylglycerol kinase 6; Short=AtDGK6; Short=DAG kinase 6; EC=2.7.1.107; AltName: Full=Diglyceride kinase 6; Short=DGK 6;	RecName: Full=Diacylglycerol kinase {ECO:0000256|RuleBase:RU361128}; Short=DAG kinase {ECO:0000256|RuleBase:RU361128}; EC=2.7.1.107 {ECO:0000256|RuleBase:RU361128};	Diacylglycerol kinase	GO:0009507,chloroplast; GO:0005524,ATP binding; GO:0004143,diacylglycerol kinase activity; GO:0003951,NAD+ kinase activity; GO:0006952,defense response; GO:0007205,protein kinase C-activating G protein-coupled receptor signaling pathway	ATP-NAD kinase
Cluster-10658.136123	TRUE	TRUE	TRUE	--	hypothetical protein DCAR_002343 [Daucus carota subsp. sativus]	--	SubName: Full=Uncharacterized protein {ECO:0000313|EMBL:KZN09687.1};	--	--	--
Cluster-10658.70937	TRUE	TRUE	TRUE	K08909 light-harvesting complex I chlorophyll a/b binding protein 3 | (RefSeq) chlorophyll a-b binding protein 8, chloroplastic (A)	chlorophyll a-b binding protein 8, chloroplastic [Olea europaea var. sylvestris]	RecName: Full=Chlorophyll a-b binding protein 8, chloroplastic; AltName: Full=LHCI type III CAB-8; Flags: Precursor;	RecName: Full=Chlorophyll a-b binding protein, chloroplastic {ECO:0000256|RuleBase:RU363080};	--	GO:0009941,chloroplast envelope; GO:0009535,chloroplast thylakoid membrane; GO:0016021,integral component of membrane; GO:0009522,photosystem I; GO:0009523,photosystem II; GO:0010287,plastoglobule; GO:0016168,chlorophyll binding; GO:0046872,metal ion binding; GO:0031409,pigment binding; GO:0009768,photosynthesis, light harvesting in photosystem I; GO:0018298,protein-chromophore linkage; GO:000941…	Chlorophyll A-B binding protein
Cluster-10658.71559	TRUE	TRUE	TRUE	K01938 formate--tetrahydrofolate ligase [EC:6.3.4.3] | (RefSeq) formate--tetrahydrofolate ligase (A)	PREDICTED: formate--tetrahydrofolate ligase [Daucus carota subsp. sativus]	RecName: Full=Formate--tetrahydrofolate ligase; EC=6.3.4.3; AltName: Full=10-formyletrahydrofolate synthetase; Short=FHS; Short=FTHFS; AltName: Full=Formyltetrahydrofolate synthetase;	SubName: Full=Uncharacterized protein {ECO:0000313|EMBL:KZM87238.1};	--	GO:0048046,apoplast; GO:0009507,chloroplast; GO:0005829,cytosol; GO:0005886,plasma membrane; GO:0005524,ATP binding; GO:0005507,copper ion binding; GO:0004329,formate-tetrahydrofolate ligase activity; GO:0004477,methenyltetrahydrofolate cyclohydrolase activity; GO:0004488,methylenetetrahydrofolate dehydrogenase (NADP+) activity; GO:0009257,10-formyltetrahydrofolate biosynthetic process; GO:000911…	Formate--tetrahydrofolate ligase
Cluster-10658.122044	TRUE	TRUE	TRUE	K04733 interleukin-1 receptor-associated kinase 4 [EC:2.7.11.1] | (RefSeq) probable LRR receptor-like serine/threonine-protein kinase At1g51880 (A)	PREDICTED: uncharacterized protein LOC18606588 [Theobroma cacao]	RecName: Full=Heavy metal-associated isoprenylated plant protein 39 {ECO:0000303|PubMed:21072340, ECO:0000303|PubMed:23368984}; Short=AtHIP39 {ECO:0000303|PubMed:21072340, ECO:0000303|PubMed:23368984}; Flags: Precursor;	SubName: Full=Heavy metal transport/detoxification superfamily protein isoform 1 {ECO:0000313|EMBL:EOY24847.1};	Copper chaperone	GO:0005737,cytoplasm; GO:0046914,transition metal ion binding; GO:0046916,cellular transition metal ion homeostasis; GO:0030001,metal ion transport	Heavy-metal-associated domain
Cluster-10658.134645	TRUE	TRUE	TRUE	--	PREDICTED: uncharacterized protein LOC105123549 [Populus euphratica]	--	SubName: Full=Uncharacterized protein {ECO:0000313|EMBL:EEE95618.1};	--	--	--
Cluster-10658.76159	TRUE	TRUE	TRUE	K13448 calcium-binding protein CML | (RefSeq) calmodulin-like protein 11 (A)	PREDICTED: calmodulin-like protein 11 [Daucus carota subsp. sativus]	RecName: Full=Calmodulin-like protein 11;	SubName: Full=Uncharacterized protein {ECO:0000313|EMBL:KZM85325.1};	Calmodulin and related proteins (EF-Hand superfamily)	GO:0005509,calcium ion binding	Ca2+ insensitive EF hand
Cluster-10658.154639	TRUE	TRUE	TRUE	K06995 uncharacterized protein | (RefSeq) uncharacterized LOC105043207 (A)	PREDICTED: uncharacterized protein LOC108213442 [Daucus carota subsp. sativus]	--	SubName: Full=Uncharacterized protein {ECO:0000313|EMBL:CDP03811.1};	--	--	Cupin
Cluster-10658.135009	TRUE	TRUE	TRUE	K23222 nuclease HARBI1 [EC:3.1.-.-] | (RefSeq) uncharacterized protein LOC108205488 (A)	PREDICTED: uncharacterized protein LOC108205488 [Daucus carota subsp. sativus]	--	SubName: Full=Harbinger transposase-derived nuclease {ECO:0000313|EMBL:KVI01529.1};	Predicted transposase	--	--
Cluster-10658.981	TRUE	TRUE	TRUE	--	PREDICTED: gamma-glutamyl-gamma-aminobutyrate hydrolase-like [Daucus carota subsp. sativus]	RecName: Full=Putative glutamine amidotransferase GAT1_2.1 {ECO:0000305}; EC=2.4.2.- {ECO:0000305}; AltName: Full=Class I glutamine amidotransferase {ECO:0000303|PubMed:22885937}; AltName: Full=GAT1_2 domain-containing protein 1 {ECO:0000305};	SubName: Full=Uncharacterized protein {ECO:0000313|EMBL:ESR43968.1};	--	GO:0016787,hydrolase activity; GO:0016740,transferase activity; GO:0006541,glutamine metabolic process; GO:2000032,regulation of secondary shoot formation	Glutamine amidotransferase class-I
Cluster-10658.80445	TRUE	TRUE	TRUE	K00679 phospholipid:diacylglycerol acyltransferase [EC:2.3.1.158] | (RefSeq) hypothetical protein (A)	PREDICTED: GDSL esterase/lipase At5g55050 [Daucus carota subsp. sativus]	RecName: Full=GDSL esterase/lipase At5g55050; EC=3.1.1.-; AltName: Full=Extracellular lipase At5g55050; Flags: Precursor;	SubName: Full=Uncharacterized protein {ECO:0000313|EMBL:KZM93469.1};	--	GO:0005576,extracellular region; GO:0016298,lipase activity; GO:0016042,lipid catabolic process	GDSL-like Lipase/Acylhydrolase
Cluster-10658.137839	TRUE	TRUE	TRUE	K02115 F-type H+-transporting ATPase subunit gamma | (RefSeq) ATP synthase gamma chain, chloroplastic (A)	hypothetical protein DCAR_004220 [Daucus carota subsp. sativus]	RecName: Full=ATP synthase gamma chain, chloroplastic; AltName: Full=F-ATPase gamma subunit; Flags: Precursor;	SubName: Full=Uncharacterized protein {ECO:0000313|EMBL:KZN11564.1};	F0F1-type ATP synthase, gamma subunit	GO:0009535,chloroplast thylakoid membrane; GO:0045261,proton-transporting ATP synthase complex, catalytic core F(1); GO:0046933,proton-transporting ATP synthase activity, rotational mechanism; GO:0015986,ATP synthesis coupled proton transport	ATP synthase
Cluster-10658.168361	TRUE	TRUE	TRUE	--	--	--	--	--	--	--
Cluster-10658.33378	TRUE	TRUE	TRUE	--	--	--	--	--	--	--
Cluster-10658.66945	TRUE	TRUE	TRUE	--	PREDICTED: probable F-box protein At4g22030 [Daucus carota subsp. sativus]	RecName: Full=Probable F-box protein At4g22030;	SubName: Full=Uncharacterized protein {ECO:0000313|EMBL:KZN07329.1};	--	--	Petal formation-expressed
Cluster-10658.75260	TRUE	TRUE	TRUE	K08235 xyloglucan:xyloglucosyl transferase [EC:2.4.1.207] | (RefSeq) xyloglucan endotransglucosylase/hydrolase protein 31-like (A)	PREDICTED: xyloglucan endotransglucosylase/hydrolase protein 31-like [Daucus carota subsp. sativus]	RecName: Full=Probable xyloglucan endotransglucosylase/hydrolase protein 32; Short=At-XTH32; Short=XTH-32; EC=2.4.1.207; Flags: Precursor;	RecName: Full=Xyloglucan endotransglucosylase/hydrolase {ECO:0000256|RuleBase:RU361120}; EC=2.4.1.207 {ECO:0000256|RuleBase:RU361120};	--	GO:0048046,apoplast; GO:0005618,cell wall; GO:0004553,hydrolase activity, hydrolyzing O-glycosyl compounds; GO:0016762,xyloglucan:xyloglucosyl transferase activity; GO:0042546,cell wall biogenesis; GO:0016998,cell wall macromolecule catabolic process; GO:0071555,cell wall organization; GO:0010411,xyloglucan metabolic process	Xyloglucan endo-transglycosylase (XET) C-terminus
Cluster-10658.97549	TRUE	TRUE	TRUE	K04733 interleukin-1 receptor-associated kinase 4 [EC:2.7.11.1] | (RefSeq) probably inactive leucine-rich repeat receptor-like protein kinase At5g06940 (A)	PREDICTED: LOW QUALITY PROTEIN: probably inactive leucine-rich repeat receptor-like protein kinase At5g06940 [Vitis vinifera]	RecName: Full=Probably inactive leucine-rich repeat receptor-like protein kinase At5g06940; Flags: Precursor;	SubName: Full=Uncharacterized protein {ECO:0000313|EMBL:KZM92166.1};	--	GO:0016021,integral component of membrane; GO:0005524,ATP binding; GO:0004672,protein kinase activity	Leucine Rich Repeat
Cluster-10658.121299	TRUE	TRUE	TRUE	K14207 solute carrier family 38 (sodium-coupled neutral amino acid transporter), member 2 | (RefSeq) probable sodium-coupled neutral amino acid transporter 6 (A)	PREDICTED: probable sodium-coupled neutral amino acid transporter 6 [Daucus carota subsp. sativus]	RecName: Full=Amino acid transporter AVT6A {ECO:0000305}; Short=AtAvt6A {ECO:0000303|PubMed:27925655};	SubName: Full=Uncharacterized protein {ECO:0000313|EMBL:KZM82577.1};	Amino acid transporter protein	GO:0016021,integral component of membrane; GO:0005774,vacuolar membrane; GO:0005773,vacuole; GO:0015171,amino acid transmembrane transporter activity; GO:0003333,amino acid transmembrane transport	--
Cluster-10658.92314	TRUE	TRUE	TRUE	K05666 ATP-binding cassette, subfamily C (CFTR/MRP), member 2 | (RefSeq) ABC transporter C family member 3 (A)	PREDICTED: ABC transporter C family member 3 [Juglans regia]	RecName: Full=ABC transporter C family member 3; Short=ABC transporter ABCC.3; Short=AtABCC3; EC=3.6.3.44; AltName: Full=ATP-energized glutathione S-conjugate pump 3; AltName: Full=Glutathione S-conjugate-transporting ATPase 3; AltName: Full=Multidrug resistance-associated protein 3;	SubName: Full=ABC transporter C family member 3 {ECO:0000313|RefSeq:XP_018812887.1};	Multidrug resistance-associated protein/mitoxantrone resistance protein, ABC superfamily	GO:0048046,apoplast; GO:0016021,integral component of membrane; GO:0000325,plant-type vacuole; GO:0009506,plasmodesma; GO:0005774,vacuolar membrane; GO:0005773,vacuole; GO:0005524,ATP binding; GO:0042626,ATPase activity, coupled to transmembrane movement of substances; GO:0010290,chlorophyll catabolite transmembrane transporter activity; GO:0015431,glutathione S-conjugate-exporting ATPase activit…	ABC transporter
Cluster-10658.99215	TRUE	TRUE	TRUE	--	PREDICTED: BON1-associated protein 2-like [Daucus carota subsp. sativus]	RecName: Full=BON1-associated protein 2; AltName: Full=Protein BON1-ASSOCIATED PROTEIN 1-LIKE;	SubName: Full=Uncharacterized protein {ECO:0000313|EMBL:KZM97037.1};	--	GO:0016020,membrane; GO:0006952,defense response	C2 domain
Cluster-10658.107111	TRUE	TRUE	TRUE	--	pathogensis-related protein 10 [Panax notoginseng]	RecName: Full=Pathogenesis-related protein 2;	SubName: Full=Pathogensis-related protein 10 {ECO:0000313|EMBL:ASM46793.1};	--	GO:0006952,defense response; GO:0009607,response to biotic stimulus	Pathogenesis-related protein Bet v I family
Cluster-10658.86501	TRUE	TRUE	TRUE	K10256 omega-6 fatty acid desaturase / acyl-lipid omega-6 desaturase (Delta-12 desaturase) [EC:1.14.19.6 1.14.19.22] | (RefSeq) delta(12)-fatty-acid desaturase FAD2-like (A)	PREDICTED: delta(12)-fatty-acid desaturase FAD2-like [Daucus carota subsp. sativus]	RecName: Full=Delta(12) fatty acid desaturase FAD2 {ECO:0000303|PubMed:11161042}; Short=CoFad2 {ECO:0000303|PubMed:11161042}; EC=1.14.19.- {ECO:0000305};	SubName: Full=Uncharacterized protein {ECO:0000313|EMBL:KZM99087.1};	--	GO:0016021,integral component of membrane; GO:0016717,oxidoreductase activity, acting on paired donors, with oxidation of a pair of donors resulting in the reduction of molecular oxygen to two molecules of water; GO:0006636,unsaturated fatty acid biosynthetic process	Domain of unknown function (DUF3474)
Cluster-10658.85942	TRUE	TRUE	TRUE	--	--	--	--	--	--	--
Cluster-10658.134113	TRUE	TRUE	TRUE	K00924 kinase [EC:2.7.1.-] | (RefSeq) aspartic proteinase-like protein 2 isoform X1 (A)	PREDICTED: aspartic proteinase-like protein 2 isoform X3 [Daucus carota subsp. sativus]	RecName: Full=Aspartic proteinase-like protein 2; EC=3.4.23.-; Flags: Precursor;	SubName: Full=Uncharacterized protein {ECO:0000313|EMBL:KZM95511.1};	Aspartyl protease	GO:0031225,anchored component of membrane; GO:0046658,anchored component of plasma membrane; GO:0005886,plasma membrane; GO:0004190,aspartic-type endopeptidase activity; GO:0030163,protein catabolic process; GO:0006508,proteolysis	Xylanase inhibitor N-terminal
Cluster-10658.103865	TRUE	TRUE	TRUE	--	specific abundant protein 3 [Panax ginseng]	--	SubName: Full=Specific abundant protein 3 {ECO:0000313|EMBL:AAX40471.1};	--	--	Family of unknown function (DUF5637)
Cluster-10658.126022	TRUE	TRUE	TRUE	K03514 non-canonical poly(A) RNA polymerase PAPD5/7 [EC:2.7.7.19] | (Kazusa) Lj3g3v1440190.3; - (A)	PREDICTED: uncharacterized protein LOC108218607 isoform X1 [Daucus carota subsp. sativus]	RecName: Full=AAA-ATPase At3g28540; EC=3.6.1.3 {ECO:0000250|UniProtKB:Q9FLD5};	SubName: Full=Uncharacterized protein {ECO:0000313|EMBL:KZM96760.1};	DNA polymerase sigma	GO:0016021,integral component of membrane; GO:0005524,ATP binding; GO:0016887,ATPase activity	Cid1 family poly A polymerase
Cluster-10658.89405	TRUE	TRUE	TRUE	--	PREDICTED: putative transcription factor bHLH041 isoform X1 [Daucus carota subsp. sativus]	RecName: Full=Putative transcription factor bHLH041; AltName: Full=Basic helix-loop-helix protein 41; Short=AtbHLH41; Short=bHLH 41; AltName: Full=Transcription factor EN 51; AltName: Full=bHLH transcription factor bHLH041;	SubName: Full=Uncharacterized protein {ECO:0000313|EMBL:KZN03211.1};	--	GO:0005634,nucleus; GO:0003677,DNA binding; GO:0003700,DNA-binding transcription factor activity; GO:0046983,protein dimerization activity; GO:0006355,regulation of transcription, DNA-templated; GO:0010200,response to chitin; GO:0006351,transcription, DNA-templated	Helix-loop-helix DNA-binding domain
Cluster-10658.155229	TRUE	TRUE	TRUE	--	--	--	--	--	--	--
Cluster-10658.61439	TRUE	TRUE	TRUE	--	unnamed protein product [Coffea canephora]	RecName: Full=Ankyrin repeat-containing protein ITN1; AltName: Full=Protein INCREASED TOLERANCE TO NACL {ECO:0000303|PubMed:18643991};	SubName: Full=Uncharacterized protein {ECO:0000313|EMBL:CDP00021.1};	FOG: Ankyrin repeat	GO:0016021,integral component of membrane; GO:0005634,nucleus; GO:0005886,plasma membrane; GO:0034613,cellular protein localization; GO:0009651,response to salt stress; GO:0007165,signal transduction	--
Cluster-10658.31678	TRUE	TRUE	TRUE	--	hypothetical protein DCAR_032144 [Daucus carota subsp. sativus]	--	SubName: Full=Uncharacterized protein {ECO:0000313|EMBL:KZM80243.1};	--	--	--
Cluster-10658.142556	TRUE	TRUE	TRUE	--	--	--	--	--	--	--
Cluster-10658.55050	TRUE	TRUE	TRUE	--	PREDICTED: transcription factor bHLH92-like [Daucus carota subsp. sativus]	RecName: Full=Transcription factor bHLH92; AltName: Full=Basic helix-loop-helix protein 92; Short=AtbHLH92; Short=bHLH 92; AltName: Full=Transcription factor EN 22; AltName: Full=bHLH transcription factor bHLH092;	SubName: Full=Uncharacterized protein {ECO:0000313|EMBL:KZM85303.1};	--	GO:0005634,nucleus; GO:0003677,DNA binding; GO:0003700,DNA-binding transcription factor activity; GO:0046983,protein dimerization activity; GO:0006355,regulation of transcription, DNA-templated; GO:0006351,transcription, DNA-templated	--
Cluster-10658.158408	TRUE	TRUE	TRUE	K23260 scopoletin glucosyltransferase [EC:2.4.1.128] | (RefSeq) hypothetical protein (A)	UGTPg18 [Panax ginseng]	RecName: Full=Soyasapogenol B glucuronide galactosyltransferase; EC=2.4.1.272; AltName: Full=Soyasaponin glycosyltransferase 2; AltName: Full=UDP-galactose:SBMG-galactosyltransferase;	RecName: Full=Glycosyltransferase {ECO:0000256|RuleBase:RU362057}; EC=2.4.1.- {ECO:0000256|RuleBase:RU362057};	UDP-glucuronosyl and UDP-glucosyl transferase	GO:0043231,intracellular membrane-bounded organelle; GO:0080043,quercetin 3-O-glucosyltransferase activity; GO:0080044,quercetin 7-O-glucosyltransferase activity; GO:0102240,soyasapogenol B glucuronide galactosyltransferase activity; GO:0008152,metabolic process	Glycosyltransferase family 28 C-terminal domain
Cluster-10658.72300	TRUE	TRUE	TRUE	K00555 tRNA (guanine26-N2/guanine27-N2)-dimethyltransferase [EC:2.1.1.215 2.1.1.216] | (RefSeq) probable tRNA (guanine(26)-N(2))-dimethyltransferase 2 (A)	PREDICTED: probable tRNA (guanine(26)-N(2))-dimethyltransferase 2 [Gossypium hirsutum]	RecName: Full=Probable tRNA (guanine(26)-N(2))-dimethyltransferase 2; EC=2.1.1.216; AltName: Full=tRNA 2,2-dimethylguanosine-26 methyltransferase 2; AltName: Full=tRNA(guanine-26,N(2)-N(2)) methyltransferase 2; AltName: Full=tRNA(m(2,2)G26)dimethyltransferase 2;	RecName: Full=tRNA (guanine(26)-N(2))-dimethyltransferase {ECO:0000256|PROSITE-ProRule:PRU00958}; EC=2.1.1.216 {ECO:0000256|PROSITE-ProRule:PRU00958};	tRNA methyltransferase	GO:0005739,mitochondrion; GO:0005634,nucleus; GO:0004809,tRNA (guanine-N2-)-methyltransferase activity; GO:0000049,tRNA binding; GO:0002940,tRNA N2-guanine methylation	N2,N2-dimethylguanosine tRNA methyltransferase
Cluster-10658.140244	TRUE	TRUE	TRUE	--	--	--	--	--	--	--
Cluster-10658.63759	TRUE	TRUE	TRUE	K04733 interleukin-1 receptor-associated kinase 4 [EC:2.7.11.1] | (RefSeq) glycerophosphodiester phosphodiesterase protein kinase domain-containing GDPDL2-like (A)	PREDICTED: thaumatin-like protein 1 [Daucus carota subsp. sativus]	RecName: Full=Thaumatin-like protein 1; Flags: Precursor;	SubName: Full=Uncharacterized protein {ECO:0000313|EMBL:KZM86633.1};	--	GO:0005576,extracellular region	Thaumatin family
Cluster-10658.131380	TRUE	TRUE	TRUE	K14491 two-component response regulator ARR-B family | (RefSeq) two-component response regulator ORR24 (A)	PREDICTED: uncharacterized protein LOC108194033 [Daucus carota subsp. sativus]	RecName: Full=Transcription factor HHO3 {ECO:0000305}; AltName: Full=MYB-domain transcription factor HHO3 {ECO:0000305}; AltName: Full=Protein HRS1 HOMOLOG 3 {ECO:0000305};	SubName: Full=Uncharacterized protein {ECO:0000313|EMBL:KZM86544.1};	--	GO:0005634,nucleus; GO:0003677,DNA binding; GO:0003700,DNA-binding transcription factor activity; GO:0006355,regulation of transcription, DNA-templated; GO:0006351,transcription, DNA-templated	Myb-like DNA-binding domain
Cluster-10658.77357	TRUE	TRUE	TRUE	K11094 U2 small nuclear ribonucleoprotein B'' | (RefSeq) U2 small nuclear ribonucleoprotein B''-like isoform X1 (A)	Uncharacterized protein TCM_008722 [Theobroma cacao]	--	SubName: Full=Uncharacterized protein {ECO:0000313|EMBL:EOX99790.1};	--	GO:0016021,integral component of membrane	Protein of unknown function (DUF3339)
Cluster-10658.131777	TRUE	TRUE	TRUE	K03063 26S proteasome regulatory subunit T3 | (RefSeq) 26S protease regulatory subunit 6B homolog (A)	PREDICTED: BTB/POZ domain-containing protein NPY1 isoform X1 [Daucus carota subsp. sativus]	RecName: Full=BTB/POZ domain-containing protein NPY1; AltName: Full=Protein ENHANCER OF PINOID; AltName: Full=Protein MACCHI-BOU 4; AltName: Full=Protein NAKED PINS IN YUC MUTANTS 1;	SubName: Full=Uncharacterized protein {ECO:0000313|EMBL:KZM89777.1};	--	GO:0005770,late endosome; GO:0005886,plasma membrane; GO:0004871,NA; GO:0045176,apical protein localization; GO:0010540,basipetal auxin transport; GO:0048825,cotyledon development; GO:0009908,flower development; GO:0010229,inflorescence development; GO:0048827,phyllome development; GO:0009911,positive regulation of flower development; GO:0016567,protein ubiquitination	BTB/POZ domain
Cluster-10658.75422	TRUE	TRUE	TRUE	--	hypothetical protein A4A49_24155 [Nicotiana attenuata]	--	SubName: Full=Uncharacterized protein {ECO:0000313|EMBL:OIT26934.1};	--	GO:0016021,integral component of membrane	--
Cluster-10658.163824	TRUE	TRUE	TRUE	--	hypothetical protein DCAR_004216 [Daucus carota subsp. sativus]	--	SubName: Full=Uncharacterized protein {ECO:0000313|EMBL:KZN11560.1};	--	--	Domain of unknown function (DUF4228)
Cluster-10658.102259	TRUE	TRUE	TRUE	K20562 biphenyl-4-hydroxylase | (RefSeq) cytochrome P450 CYP736A12-like (A)	RecName: Full=Cytochrome P450 CYP736A12 AEY75215.1 cytochrome P450 CYP736A12 [Panax ginseng]	RecName: Full=Cytochrome P450 CYP736A12; EC=1.14.-.-;	SubName: Full=Cytochrome P450 {ECO:0000313|EMBL:BAD15331.1};	Cytochrome P450 CYP2 subfamily	GO:0016021,integral component of membrane; GO:0020037,heme binding; GO:0005506,iron ion binding; GO:0004497,monooxygenase activity; GO:0016705,oxidoreductase activity, acting on paired donors, with incorporation or reduction of molecular oxygen	Cytochrome P450
Cluster-10658.149751	TRUE	TRUE	TRUE	K03006 DNA-directed RNA polymerase II subunit RPB1 [EC:2.7.7.6] | (RefSeq) LOW QUALITY PROTEIN: DNA-directed RNA polymerase II subunit 1-like (A)	retrotransposon protein, putative, Ty1-copia sub-class [Oryza sativa Japonica Group]	RecName: Full=Retrovirus-related Pol polyprotein from transposon RE1; AltName: Full=Retro element 1 {ECO:0000303|PubMed:10689195}; Short=AtRE1 {ECO:0000303|PubMed:10689195}; Includes: RecName: Full=Protease RE1; EC=3.4.23.-; Includes: RecName: Full=Reverse transcriptase RE1; EC=2.7.7.49; Includes: RecName: Full=Endonuclease RE1;	SubName: Full=Retrotransposon protein, putative, Ty1-copia sub-class {ECO:0000313|EMBL:AAX92941.1}; SubName: Full=Retrotransposon protein, putative, Ty1-copia subclass {ECO:0000313|EMBL:ABA91548.1};	FOG: Transposon-encoded proteins with TYA, reverse transcriptase, integrase domains in various combinations	GO:0004190,aspartic-type endopeptidase activity; GO:0004519,endonuclease activity; GO:0046872,metal ion binding; GO:0003676,nucleic acid binding; GO:0003964,RNA-directed DNA polymerase activity; GO:0015074,DNA integration; GO:0006310,DNA recombination	Reverse transcriptase (RNA-dependent DNA polymerase)
Cluster-10658.107189	TRUE	TRUE	TRUE	K14638 solute carrier family 15 (peptide/histidine transporter), member 3/4 | (RefSeq) protein NRT1/ PTR FAMILY 1.2-like (A)	PREDICTED: protein NRT1/ PTR FAMILY 1.2-like [Daucus carota subsp. sativus]	RecName: Full=Protein NRT1/ PTR FAMILY 1.1; Short=AtNPF1.1; AltName: Full=Nitrate transporter 1.12;	SubName: Full=Uncharacterized protein {ECO:0000313|EMBL:KZN06735.1};	H+/oligopeptide symporter	GO:0016021,integral component of membrane; GO:0005886,plasma membrane; GO:0080054,low-affinity nitrate transmembrane transporter activity; GO:0015706,nitrate transport	Major Facilitator Superfamily
Cluster-10658.106165	TRUE	TRUE	TRUE	K14516 ethylene-responsive transcription factor 1 | (RefSeq) ethylene-responsive transcription factor 1B-like (A)	PREDICTED: ethylene-responsive transcription factor ERF096-like [Daucus carota subsp. sativus]	RecName: Full=Ethylene-responsive transcription factor 14; Short=AtERF14; AltName: Full=Ethylene-responsive element-binding factor 14; Short=EREBP-14;	SubName: Full=Uncharacterized protein {ECO:0000313|EMBL:KZM83170.1};	--	GO:0005634,nucleus; GO:0003677,DNA binding; GO:0003700,DNA-binding transcription factor activity; GO:0006952,defense response; GO:0009873,ethylene-activated signaling pathway; GO:0006351,transcription, DNA-templated	AP2 domain
Cluster-10658.125482	TRUE	TRUE	TRUE	K11982 E3 ubiquitin-protein ligase RNF115/126 [EC:2.3.2.27] | (RefSeq) RING-H2 finger protein ATL3-like (A)	PREDICTED: RING-H2 finger protein ATL3 [Daucus carota subsp. sativus]	RecName: Full=RING-H2 finger protein ATL60; EC=2.3.2.27 {ECO:0000305}; AltName: Full=RING-type E3 ubiquitin transferase ATL60 {ECO:0000305};	SubName: Full=Uncharacterized protein {ECO:0000313|EMBL:KZM89995.1};	FOG: Predicted E3 ubiquitin ligase	GO:0016021,integral component of membrane; GO:0046872,metal ion binding; GO:0061630,ubiquitin protein ligase activity; GO:0043161,proteasome-mediated ubiquitin-dependent protein catabolic process	FANCL C-terminal domain
Cluster-10658.46115	TRUE	TRUE	TRUE	--	--	--	--	--	--	--
Cluster-10658.83362	TRUE	TRUE	TRUE	K14493 gibberellin receptor GID1 [EC:3.-.-.-] | (RefSeq) gibberellin receptor GID1C-like (A)	PREDICTED: probable carboxylesterase 16 [Daucus carota subsp. sativus]	RecName: Full=Probable carboxylesterase 11; AltName: Full=AtCXE11; EC=3.1.1.1;	SubName: Full=Uncharacterized protein {ECO:0000313|EMBL:KZN06185.1};	Arylacetamide deacetylase	GO:0052689,carboxylic ester hydrolase activity; GO:0016787,hydrolase activity; GO:0009056,catabolic process	Carboxylesterase family
Cluster-10658.100887	TRUE	TRUE	TRUE	--	PREDICTED: uncharacterized protein LOC101207897 [Cucumis sativus]	--	SubName: Full=Uncharacterized protein {ECO:0000313|EMBL:KGN64222.1};	--	--	--
Cluster-10658.152165	TRUE	TRUE	TRUE	K08900 mitochondrial chaperone BCS1 | (RefSeq) AAA-ATPase At3g50940 (A)	PREDICTED: probable mitochondrial chaperone BCS1-B [Populus euphratica]	RecName: Full=AAA-ATPase At3g50940; EC=3.6.1.3 {ECO:0000250|UniProtKB:Q9FLD5}; Flags: Precursor;	SubName: Full=Uncharacterized protein {ECO:0000313|EMBL:OWM74659.1};	AAA+-type ATPase	GO:0005524,ATP binding; GO:0016887,ATPase activity; GO:0009651,response to salt stress	AAA domain
Cluster-10658.131779	TRUE	TRUE	TRUE	K11153 retinol dehydrogenase 12 [EC:1.1.1.300] | (RefSeq) short-chain dehydrogenase TIC 32, chloroplastic-like (A)	PREDICTED: short-chain dehydrogenase TIC 32, chloroplastic-like [Daucus carota subsp. sativus]	RecName: Full=Short-chain dehydrogenase TIC 32, chloroplastic; EC=1.1.1.-; AltName: Full=Translocon at the inner envelope membrane of chloroplasts 32; Short=AtTIC32;	SubName: Full=Uncharacterized protein {ECO:0000313|EMBL:KZN11969.1};	Dehydrogenases with different specificities (related to short-chain alcohol dehydrogenases)	GO:0009507,chloroplast; GO:0009941,chloroplast envelope; GO:0009706,chloroplast inner membrane; GO:0005886,plasma membrane; GO:0016491,oxidoreductase activity; GO:0015031,protein transport	short chain dehydrogenase
Cluster-10658.186819	TRUE	TRUE	TRUE	K01638 malate synthase [EC:2.3.3.9] | (RefSeq) malate synthase, glyoxysomal (A)	PREDICTED: malate synthase, glyoxysomal [Daucus carota subsp. sativus]	RecName: Full=Malate synthase, glyoxysomal; EC=2.3.3.9;	RecName: Full=Malate synthase {ECO:0000256|RuleBase:RU000555}; EC=2.3.3.9 {ECO:0000256|RuleBase:RU000555};	Malate synthase	GO:0009514,glyoxysome; GO:0004474,malate synthase activity; GO:0006097,glyoxylate cycle; GO:0006099,tricarboxylic acid cycle	HpcH/HpaI aldolase/citrate lyase family
Cluster-10658.88896	TRUE	TRUE	TRUE	K22374 3''-deamino-3''-oxonicotianamine reductase [EC:1.1.1.285] | (RefSeq) non-functional NADPH-dependent codeinone reductase 2-like (A)	PREDICTED: non-functional NADPH-dependent codeinone reductase 2-like [Daucus carota subsp. sativus]	RecName: Full=Deoxymugineic acid synthase 1 {ECO:0000303|PubMed:16926158}; Short=ZmDMAS1 {ECO:0000303|PubMed:16926158}; EC=1.1.1.285 {ECO:0000269|PubMed:16926158};	SubName: Full=Uncharacterized protein {ECO:0000313|EMBL:KZM87382.1};	Aldo/keto reductase family proteins	GO:0033707,3''-deamino-3''-oxonicotianamine reductase activity; GO:0034224,cellular response to zinc ion starvation; GO:1990641,response to iron ion starvation; GO:0019290,siderophore biosynthetic process	Aldo/keto reductase family
Cluster-10658.111637	TRUE	TRUE	TRUE	K03526 (E)-4-hydroxy-3-methylbut-2-enyl-diphosphate synthase [EC:1.17.7.1 1.17.7.3] | (RefSeq) 4-hydroxy-3-methylbut-2-en-1-yl diphosphate synthase (ferredoxin), chloroplastic-like (A)	(E)-4-hydroxy-3-methylbut-2-enyl-diphosphate synthase, partial [Hedera helix]	RecName: Full=4-hydroxy-3-methylbut-2-en-1-yl diphosphate synthase (ferredoxin), chloroplastic; EC=1.17.7.1 {ECO:0000269|PubMed:15650872}; AltName: Full=1-hydroxy-2-methyl-2-(E)-butenyl 4-diphosphate synthase; AltName: Full=Protein CHLOROPLAST BIOGENESIS 4; AltName: Full=Protein CONSTITUTIVE SUBTILISIN 3; Flags: Precursor;	SubName: Full=(E)-4-hydroxy-3-methylbut-2-enyl-diphosphate synthase {ECO:0000313|EMBL:APY22346.1}; Flags: Fragment;	--	GO:0009507,chloroplast; GO:0009941,chloroplast envelope; GO:0009570,chloroplast stroma; GO:0051539,4 iron, 4 sulfur cluster binding; GO:0046429,4-hydroxy-3-methylbut-2-en-1-yl diphosphate synthase activity; GO:0005506,iron ion binding; GO:0019288,isopentenyl diphosphate biosynthetic process, methylerythritol 4-phosphate pathway; GO:0009617,response to bacterium; GO:0009862,systemic acquired resis…	GcpE protein
Cluster-10658.168785	TRUE	TRUE	TRUE	K10696 E3 ubiquitin-protein ligase BRE1 [EC:2.3.2.27] | (RefSeq) E3 ubiquitin-protein ligase BRE1-like 2 isoform X1 (A)	PREDICTED: E3 ubiquitin-protein ligase BRE1-like 2 isoform X3 [Daucus carota subsp. sativus]	RecName: Full=E3 ubiquitin-protein ligase BRE1-like 2; EC=2.3.2.27 {ECO:0000269|PubMed:17329563}; AltName: Full=Protein HISTONE MONOUBIQUITINATION 2; Short=AtHUB2; AltName: Full=RING-type E3 ubiquitin transferase BRE1-like 2 {ECO:0000305};	SubName: Full=Uncharacterized protein {ECO:0000313|EMBL:KZN09338.1};	E3 ubiquitin ligase involved in syntaxin degradation	GO:0005634,nucleus; GO:0046872,metal ion binding; GO:0042803,protein homodimerization activity; GO:0004842,ubiquitin-protein transferase activity; GO:0033523,histone H2B ubiquitination; GO:0010390,histone monoubiquitination; GO:0045087,innate immune response; GO:0009965,leaf morphogenesis; GO:0010162,seed dormancy process; GO:0010228,vegetative to reproductive phase transition of meristem	RING-type zinc-finger
Cluster-10658.101610	TRUE	TRUE	TRUE	K23280 rhamnogalacturonan I rhamnosyltransferase [EC:2.4.1.351] | (RefSeq) uncharacterized protein At1g04910 (A)	PREDICTED: uncharacterized protein At1g04910-like [Daucus carota subsp. sativus]	RecName: Full=O-fucosyltransferase 20 {ECO:0000305}; Short=O-FucT-20 {ECO:0000305}; EC=2.4.1.- {ECO:0000305}; AltName: Full=O-fucosyltransferase family protein {ECO:0000305};	SubName: Full=Uncharacterized protein {ECO:0000313|EMBL:KZM96949.1};	--	GO:0005737,cytoplasm; GO:0000139,Golgi membrane; GO:0016021,integral component of membrane; GO:0016757,transferase activity, transferring glycosyl groups; GO:0071555,cell wall organization; GO:0006004,fucose metabolic process; GO:0006486,protein glycosylation	GDP-fucose protein O-fucosyltransferase
Cluster-10658.52106	TRUE	TRUE	TRUE	--	hypothetical protein L484_014990 [Morus notabilis]	--	SubName: Full=Uncharacterized protein {ECO:0000313|EMBL:EXC33110.1};	--	GO:0005622,intracellular; GO:0009055,electron transfer activity; GO:0015035,protein disulfide oxidoreductase activity; GO:0045454,cell redox homeostasis; GO:0035556,intracellular signal transduction	Protein of unknown function, DUF547
Cluster-10658.20346	TRUE	TRUE	TRUE	K20772 1-aminocyclopropane-1-carboxylate synthase 1/2/6 [EC:4.4.1.14] | (RefSeq) 1-aminocyclopropane-1-carboxylate synthase-like (A)	PREDICTED: 1-aminocyclopropane-1-carboxylate synthase-like [Daucus carota subsp. sativus]	RecName: Full=1-aminocyclopropane-1-carboxylate synthase; Short=ACC synthase; EC=4.4.1.14; AltName: Full=S-adenosyl-L-methionine methylthioadenosine-lyase;	SubName: Full=Uncharacterized protein {ECO:0000313|EMBL:KZN07965.1};	1-aminocyclopropane-1-carboxylate synthase, and related proteins	GO:0016847,1-aminocyclopropane-1-carboxylate synthase activity; GO:0030170,pyridoxal phosphate binding; GO:0009693,ethylene biosynthetic process; GO:0009835,fruit ripening	Aminotransferase class I and II
Cluster-10658.95771	TRUE	TRUE	TRUE	K21373 7-deoxyloganetic acid glucosyltransferase [EC:2.4.1.323] | (RefSeq) 7-deoxyloganetic acid glucosyltransferase-like (A)	PREDICTED: uncharacterized protein At1g66480-like [Daucus carota subsp. sativus]	RecName: Full=Uncharacterized protein At1g66480;	SubName: Full=Uncharacterized protein {ECO:0000313|EMBL:KZM82647.1};	--	GO:0005886,plasma membrane	Domain of unknown function (DUF4228)
Cluster-10658.119675	TRUE	TRUE	TRUE	--	--	--	--	--	--	--
Cluster-10658.130860	TRUE	TRUE	TRUE	K22684 metacaspase-1 [EC:3.4.22.-] | (RefSeq) putative metacaspase (A)	PREDICTED: protein strawberry notch-like [Daucus carota subsp. sativus]	RecName: Full=Protein FORGETTER 1 {ECO:0000303|PubMed:27680998}; AltName: Full=Protein EMBRYO DEFECTIVE 1135 {ECO:0000303|PubMed:15266054};	SubName: Full=protein strawberry notch {ECO:0000313|RefSeq:XP_010260806.1};	Nuclear helicase MOP-3/SNO (DEAD-box superfamily)	GO:0005829,cytosol; GO:0005634,nucleus; GO:0031490,chromatin DNA binding; GO:0042393,histone binding; GO:0046872,metal ion binding; GO:1990841,promoter-specific chromatin binding; GO:0010286,heat acclimation; GO:0007275,multicellular organism development; GO:0006334,nucleosome assembly; GO:0016584,nucleosome positioning; GO:1900036,positive regulation of cellular response to heat; GO:0040029,regu…	PHD-finger
Cluster-10658.97871	TRUE	TRUE	TRUE	K00422 polyphenol oxidase [EC:1.10.3.1] | (RefSeq) polyphenol oxidase, chloroplastic-like (A)	PREDICTED: polyphenol oxidase, chloroplastic-like [Daucus carota subsp. sativus]	RecName: Full=Polyphenol oxidase, chloroplastic; Short=PPO; EC=1.10.3.1; AltName: Full=Catechol oxidase; Flags: Precursor;	SubName: Full=Uncharacterized protein {ECO:0000313|EMBL:KZN07214.1};	--	GO:0009543,chloroplast thylakoid lumen; GO:0004097,catechol oxidase activity; GO:0046872,metal ion binding; GO:0046148,pigment biosynthetic process	Polyphenol oxidase middle domain
Cluster-10658.75889	TRUE	TRUE	TRUE	K13420 LRR receptor-like serine/threonine-protein kinase FLS2 [EC:2.7.11.1] | (RefSeq) probable LRR receptor-like serine/threonine-protein kinase At3g47570 (A)	PREDICTED: probable LRR receptor-like serine/threonine-protein kinase At3g47570 [Nicotiana sylvestris]	RecName: Full=Probable LRR receptor-like serine/threonine-protein kinase At3g47570; EC=2.7.11.1; Flags: Precursor;	SubName: Full=probable LRR receptor-like serine/threonine-protein kinase At3g47570 {ECO:0000313|RefSeq:XP_009780759.1};	--	GO:0016021,integral component of membrane; GO:0005886,plasma membrane; GO:0005524,ATP binding; GO:0004674,protein serine/threonine kinase activity	Protein kinase domain
Cluster-10658.44480	TRUE	TRUE	TRUE	--	PREDICTED: uncharacterized protein LOC108222229 [Daucus carota subsp. sativus]	RecName: Full=Vascular-related unknown protein 1 {ECO:0000303|PubMed:24567189};	SubName: Full=Uncharacterized protein {ECO:0000313|EMBL:KZM96527.1};	--	GO:0005829,cytosol; GO:0005634,nucleus; GO:0010089,xylem development	--
Cluster-10658.95873	TRUE	TRUE	TRUE	K14963 COMPASS component SWD3 | (RefSeq) myosin heavy chain kinase B-like (A)	PREDICTED: F-box/WD repeat-containing protein 7 [Daucus carota subsp. sativus]	RecName: Full=Protein JINGUBANG {ECO:0000303|PubMed:27468890};	SubName: Full=Uncharacterized protein {ECO:0000313|EMBL:KZM90554.1};	FOG: WD40 repeat	GO:0005737,cytoplasm; GO:0005634,nucleus; GO:0009846,pollen germination	Ciliary BBSome complex subunit 2, middle region
Cluster-10658.84689	TRUE	TRUE	TRUE	K04733 interleukin-1 receptor-associated kinase 4 [EC:2.7.11.1] | (RefSeq) U-box domain-containing protein 35-like (A)	PREDICTED: U-box domain-containing protein 35-like isoform X2 [Daucus carota subsp. sativus]	RecName: Full=U-box domain-containing protein 35; AltName: Full=Plant U-box protein 35; Includes: RecName: Full=E3 ubiquitin ligase; EC=2.3.2.27; AltName: Full=RING-type E3 ubiquitin transferase {ECO:0000305}; Includes: RecName: Full=Serine/threonine-protein kinase; EC=2.7.11.-;	SubName: Full=Uncharacterized protein {ECO:0000313|EMBL:KZN00699.1};	--	GO:0005524,ATP binding; GO:0004674,protein serine/threonine kinase activity; GO:0004842,ubiquitin-protein transferase activity; GO:0006950,response to stress	Phosphotransferase enzyme family
Cluster-10658.76571	TRUE	TRUE	TRUE	--	uncharacterized protein At4g00950 [Prunus avium]	--	SubName: Full=Uncharacterized protein {ECO:0000313|EMBL:EMJ20298.1};	--	--	--
Cluster-10658.128783	TRUE	TRUE	TRUE	--	PREDICTED: uncharacterized protein LOC105137807 [Populus euphratica]	--	SubName: Full=Uncharacterized protein {ECO:0000313|EMBL:PIA48552.1};	--	--	--
Cluster-10658.47298	TRUE	TRUE	TRUE	K17500 integrin-linked kinase-associated serine/threonine phosphatase 2C [EC:3.1.3.16] | (RefSeq) probable protein phosphatase 2C 63 (A)	probable protein phosphatase 2C 63 [Herrania umbratica]	RecName: Full=Probable protein phosphatase 2C 63; Short=AtPP2C63; EC=3.1.3.16;	SubName: Full=Phosphatase 2C family protein {ECO:0000313|EMBL:EOX98421.1};	Protein phosphatase 2C/pyruvate dehydrogenase (lipoamide) phosphatase	GO:0046872,metal ion binding; GO:0004722,protein serine/threonine phosphatase activity	Protein phosphatase 2C
Cluster-10658.92974	TRUE	TRUE	TRUE	K16040 trans-resveratrol di-O-methyltransferase [EC:2.1.1.240] | (RefSeq) trans-resveratrol di-O-methyltransferase (A)	unnamed protein product, partial [Vitis vinifera]	RecName: Full=Trans-resveratrol di-O-methyltransferase; EC=2.1.1.240; AltName: Full=Resveratrol O-methyltransferase; Short=ROMT; Short=VvROMT;	SubName: Full=Trans-resveratrol di-O-methyltransferase {ECO:0000313|EMBL:OAY66241.1};	--	GO:0008171,O-methyltransferase activity; GO:0046983,protein dimerization activity; GO:0102303,resveratrol 3,5-O-dimethyltransferase activity; GO:0008757,S-adenosylmethionine-dependent methyltransferase activity; GO:0019438,aromatic compound biosynthetic process	O-methyltransferase domain
Cluster-10658.66384	TRUE	TRUE	TRUE	--	--	--	--	--	--	--
Cluster-10658.17976	TRUE	TRUE	TRUE	K04733 interleukin-1 receptor-associated kinase 4 [EC:2.7.11.1] | (RefSeq) serine/threonine-protein kinase At5g01020 (A)	PREDICTED: serine/threonine-protein kinase At5g01020 [Daucus carota subsp. sativus]	RecName: Full=Probable serine/threonine-protein kinase PBL15 {ECO:0000305}; EC=2.7.11.1 {ECO:0000305}; AltName: Full=PBS1-like protein 15 {ECO:0000303|PubMed:20413097};	SubName: Full=Uncharacterized protein {ECO:0000313|EMBL:KZN11887.1};	Serine/threonine protein kinase	GO:0005886,plasma membrane; GO:0005524,ATP binding; GO:0004675,transmembrane receptor protein serine/threonine kinase activity; GO:0007166,cell surface receptor signaling pathway; GO:0006952,defense response; GO:0006468,protein phosphorylation	Protein kinase domain
Cluster-10658.161203	TRUE	TRUE	TRUE	K00901 diacylglycerol kinase (ATP) [EC:2.7.1.107] | (RefSeq) diacylglycerol kinase 5-like (A)	diacylglycerol kinase 5-like [Olea europaea var. sylvestris]	RecName: Full=Diacylglycerol kinase 6; Short=AtDGK6; Short=DAG kinase 6; EC=2.7.1.107; AltName: Full=Diglyceride kinase 6; Short=DGK 6;	RecName: Full=Diacylglycerol kinase {ECO:0000256|RuleBase:RU361128}; Short=DAG kinase {ECO:0000256|RuleBase:RU361128}; EC=2.7.1.107 {ECO:0000256|RuleBase:RU361128};	Diacylglycerol kinase	GO:0009507,chloroplast; GO:0005524,ATP binding; GO:0004143,diacylglycerol kinase activity; GO:0003951,NAD+ kinase activity; GO:0006952,defense response; GO:0007205,protein kinase C-activating G protein-coupled receptor signaling pathway	ATP-NAD kinase
Cluster-10658.132400	TRUE	TRUE	TRUE	--	--	RecName: Full=Probable beta-1,3-galactosyltransferase 4; EC=2.4.1.-;	--	--	GO:0000139,Golgi membrane; GO:0016021,integral component of membrane; GO:0008378,galactosyltransferase activity; GO:0006486,protein glycosylation	--
Cluster-10658.107455	TRUE	TRUE	TRUE	K23280 rhamnogalacturonan I rhamnosyltransferase [EC:2.4.1.351] | (RefSeq) hypothetical protein (A)	PREDICTED: uncharacterized protein At1g04910-like, partial [Juglans regia]	RecName: Full=O-fucosyltransferase 19 {ECO:0000305}; Short=O-FucT-19 {ECO:0000305}; EC=2.4.1.- {ECO:0000305}; AltName: Full=O-fucosyltransferase family protein {ECO:0000305};	SubName: Full=uncharacterized protein At1g04910-like {ECO:0000313|RefSeq:XP_018832131.1};	--	GO:0005737,cytoplasm; GO:0016021,integral component of membrane; GO:0016757,transferase activity, transferring glycosyl groups; GO:0006004,fucose metabolic process; GO:0006486,protein glycosylation	GDP-fucose protein O-fucosyltransferase
Cluster-10658.187370	TRUE	TRUE	TRUE	K22314 glucosinolate gamma-glutamyl hydrolase [EC:3.4.19.16] | (RefSeq) putative glutamine amidotransferase YLR126C (A)	PREDICTED: gamma-glutamyl peptidase 5 [Solanum lycopersicum]	RecName: Full=Gamma-glutamyl peptidase 5 {ECO:0000305}; EC=3.4.19.- {ECO:0000305};	SubName: Full=Uncharacterized protein {ECO:0000313|EnsemblPlants:Solyc01g106060.2.1};	Predicted glutamine synthetase	GO:0005829,cytosol; GO:0008233,peptidase activity	Homoserine O-succinyltransferase
Cluster-10658.82165	TRUE	TRUE	TRUE	K07466 replication factor A1 | (RefSeq) replication protein A 70 kDa DNA-binding subunit B-like (A)	PREDICTED: replication protein A 70 kDa DNA-binding subunit B-like [Daucus carota subsp. sativus]	RecName: Full=Replication protein A 70 kDa DNA-binding subunit B; Short=AtRPA70B; AltName: Full=AtRPA1-5; AltName: Full=Replication factor A protein 1B; AltName: Full=Replication protein A 1B; Short=AtRPA1B;	RecName: Full=Replication protein A subunit {ECO:0000256|RuleBase:RU364130};	Single-stranded DNA-binding replication protein A (RPA), large (70 kD) subunit and related ssDNA-binding proteins	GO:0005634,nucleus; GO:0003677,DNA binding; GO:0046872,metal ion binding; GO:0006310,DNA recombination; GO:0006281,DNA repair; GO:0006260,DNA replication; GO:0010224,response to UV-B	OB-fold nucleic acid binding domain
Cluster-10658.135097	TRUE	TRUE	TRUE	--	--	--	--	--	--	--
Cluster-10658.53435	TRUE	TRUE	TRUE	K17871 NADH:ubiquinone reductase (non-electrogenic) [EC:1.6.5.9] | (RefSeq) internal alternative NAD(P)H-ubiquinone oxidoreductase A2, mitochondrial-like (A)	PREDICTED: protein PSY3 isoform X2 [Vitis vinifera]	--	SubName: Full=Uncharacterized protein {ECO:0000313|EMBL:CBI15938.3};	--	--	--
Cluster-10658.116262	TRUE	TRUE	TRUE	K00901 diacylglycerol kinase (ATP) [EC:2.7.1.107] | (RefSeq) diacylglycerol kinase 5-like (A)	PREDICTED: diacylglycerol kinase 5-like isoform X1 [Erythranthe guttata]	RecName: Full=Diacylglycerol kinase 5; Short=AtDGK5; Short=DAG kinase 5; EC=2.7.1.107; AltName: Full=Diglyceride kinase 5; Short=DGK 5;	RecName: Full=Diacylglycerol kinase {ECO:0000256|RuleBase:RU361128}; Short=DAG kinase {ECO:0000256|RuleBase:RU361128}; EC=2.7.1.107 {ECO:0000256|RuleBase:RU361128};	Diacylglycerol kinase	GO:0005524,ATP binding; GO:0004143,diacylglycerol kinase activity; GO:0003951,NAD+ kinase activity; GO:0006952,defense response; GO:0007205,protein kinase C-activating G protein-coupled receptor signaling pathway	Diacylglycerol kinase catalytic domain
Cluster-10658.132975	TRUE	TRUE	TRUE	K13667 protein glucosyltransferase [EC:2.4.1.-] | (RefSeq) O-glucosyltransferase rumi homolog (A)	PREDICTED: O-glucosyltransferase rumi homolog [Daucus carota subsp. sativus]	--	SubName: Full=Uncharacterized protein {ECO:0000313|EMBL:KZM88104.1};	Endoplasmic reticulum protein EP58, contains filamin rod domain and KDEL motif	GO:0016021,integral component of membrane	Glycosyl transferase family 90
Cluster-10658.168639	TRUE	TRUE	TRUE	K14416 elongation factor 1 alpha-like protein | (RefSeq) hypothetical protein (A)	PREDICTED: flowering-promoting factor 1-like protein 3 [Daucus carota subsp. sativus]	RecName: Full=Flowering-promoting factor 1-like protein 3; AltName: Full=FPF1-like protein 3;	SubName: Full=Uncharacterized protein {ECO:0000313|EMBL:KZM87430.1};	--	--	--
Cluster-10658.23128	TRUE	TRUE	TRUE	K04733 interleukin-1 receptor-associated kinase 4 [EC:2.7.11.1] | (RefSeq) receptor-like serine/threonine-protein kinase At3g01300 (A)	receptor-like serine/threonine-protein kinase At3g01300 [Sesamum indicum]	RecName: Full=Probable serine/threonine-protein kinase PIX7 {ECO:0000305}; EC=2.7.11.1 {ECO:0000305};	SubName: Full=Uncharacterized protein {ECO:0000313|EMBL:CDP10443.1};	Serine/threonine protein kinase	GO:0005886,plasma membrane; GO:0005524,ATP binding; GO:0004675,transmembrane receptor protein serine/threonine kinase activity; GO:0007166,cell surface receptor signaling pathway; GO:0006952,defense response; GO:0006468,protein phosphorylation	Protein kinase domain
Cluster-10658.62510	TRUE	TRUE	TRUE	--	--	--	--	--	--	--
Cluster-10658.63172	TRUE	TRUE	TRUE	K08099 chlorophyllase [EC:3.1.1.14] | (RefSeq) chlorophyllase-2, chloroplastic (A)	chlorophyllase-2, chloroplastic [Hevea brasiliensis]	RecName: Full=Chlorophyllase-2, chloroplastic; Short=AtCLH2; EC=3.1.1.14; AltName: Full=Chlorophyll-chlorophyllido hydrolase 2; Short=Chlase 2; Flags: Precursor;	SubName: Full=Uncharacterized protein {ECO:0000313|EMBL:KZM87056.1};	--	GO:0009507,chloroplast; GO:0031969,chloroplast membrane; GO:0047746,chlorophyllase activity; GO:0102293,pheophytinase b activity; GO:0015996,chlorophyll catabolic process	Alpha/beta hydrolase family
Cluster-10658.50792	TRUE	TRUE	TRUE	K00734 galactosylxylosylprotein 3-beta-galactosyltransferase [EC:2.4.1.134] | (RefSeq) hydroxyproline O-galactosyltransferase GALT5-like (A)	PREDICTED: uncharacterized protein LOC108218007 [Daucus carota subsp. sativus]	RecName: Full=Hydroxyproline O-galactosyltransferase GALT3 {ECO:0000303|PubMed:26690932}; EC=2.4.1.- {ECO:0000269|PubMed:26690932}; AltName: Full=Beta-1,3-galactosyltransferase 16 {ECO:0000305};	RecName: Full=Hexosyltransferase {ECO:0000256|RuleBase:RU363063}; EC=2.4.1.- {ECO:0000256|RuleBase:RU363063};	Galactosyltransferases	GO:0005794,Golgi apparatus; GO:0000139,Golgi membrane; GO:0016021,integral component of membrane; GO:0030246,carbohydrate binding; GO:1990714,hydroxyproline O-galactosyltransferase activity; GO:0010405,arabinogalactan protein metabolic process; GO:0048354,mucilage biosynthetic process involved in seed coat development; GO:0018258,protein O-linked glycosylation via hydroxyproline; GO:0080147,root …	Galactosyltransferase
Cluster-10658.126201	TRUE	TRUE	TRUE	K22395 cinnamyl-alcohol dehydrogenase [EC:1.1.1.195] | (RefSeq) tetrahydrocannabinolic acid synthase-like (A)	PREDICTED: tetrahydrocannabinolic acid synthase-like [Daucus carota subsp. sativus]	RecName: Full=Berberine bridge enzyme-like 24 {ECO:0000303|PubMed:26037923}; Short=AtBBE-like 24 {ECO:0000303|PubMed:26037923}; EC=1.1.1.- {ECO:0000250|UniProtKB:O64743}; Flags: Precursor;	SubName: Full=Uncharacterized protein {ECO:0000313|EMBL:KZM96849.1};	--	GO:0005618,cell wall; GO:0005576,extracellular region; GO:0009506,plasmodesma; GO:0050660,flavin adenine dinucleotide binding; GO:0016614,oxidoreductase activity, acting on CH-OH group of donors; GO:0006979,response to oxidative stress	Berberine and berberine like
Cluster-10658.85276	TRUE	TRUE	TRUE	K07198 5'-AMP-activated protein kinase, catalytic alpha subunit [EC:2.7.11.11] | (RefSeq) LOW QUALITY PROTEIN: CBL-interacting serine/threonine-protein kinase 1 (A)	PREDICTED: LOW QUALITY PROTEIN: CBL-interacting serine/threonine-protein kinase 1 [Daucus carota subsp. sativus]	--	RecName: Full=Non-specific serine/threonine protein kinase {ECO:0000256|SAAS:SAAS00804148}; EC=2.7.11.1 {ECO:0000256|SAAS:SAAS00804148};	--	GO:0005524,ATP binding; GO:0004674,protein serine/threonine kinase activity; GO:0007165,signal transduction	--
Cluster-10658.83138	TRUE	TRUE	TRUE	no KO assigned | (RefSeq) crocetin glucosyltransferase, chloroplastic-like (A)	UGTPg41 [Panax ginseng]	RecName: Full=Crocetin glucosyltransferase, chloroplastic; EC=2.4.1.271; AltName: Full=UDP-glucose glucosyltransferase 1; Short=GjUGT1; AltName: Full=UDP-glycosyltransferase 75L6; Flags: Precursor;	RecName: Full=Glycosyltransferase {ECO:0000256|RuleBase:RU362057}; EC=2.4.1.- {ECO:0000256|RuleBase:RU362057};	UDP-glucuronosyl and UDP-glucosyl transferase	GO:0009507,chloroplast; GO:0016758,transferase activity, transferring hexosyl groups; GO:0008152,metabolic process	Glycosyltransferase family 28 N-terminal domain
Cluster-10658.102100	TRUE	TRUE	TRUE	--	--	--	--	--	--	--
Cluster-10658.67505	TRUE	TRUE	TRUE	K08332 vacuolar protein 8 | (RefSeq) U-box domain-containing protein 44-like (A)	PREDICTED: U-box domain-containing protein 43 [Vitis vinifera]	RecName: Full=U-box domain-containing protein 44; EC=2.3.2.27; AltName: Full=Plant U-box protein 44; AltName: Full=Protein SENESCENCE-ASSOCIATED E3 UBIQUITIN LIGASE 1; AltName: Full=RING-type E3 ubiquitin transferase PUB44 {ECO:0000305};	RecName: Full=RING-type E3 ubiquitin transferase {ECO:0000256|SAAS:SAAS00702733}; EC=2.3.2.27 {ECO:0000256|SAAS:SAAS00702733};	FOG: Armadillo/beta-catenin-like repeats	GO:0005737,cytoplasm; GO:0005634,nucleus; GO:0005886,plasma membrane; GO:0070696,transmembrane receptor protein serine/threonine kinase binding; GO:0004842,ubiquitin-protein transferase activity; GO:0010150,leaf senescence; GO:0090359,negative regulation of abscisic acid biosynthetic process; GO:0010115,regulation of abscisic acid biosynthetic process; GO:0010380,regulation of chlorophyll biosynt…	Domain of unknown function (DUF3361)
Cluster-10658.32211	TRUE	TRUE	TRUE	--	PREDICTED: uncharacterized protein LOC100261894 [Vitis vinifera]	--	SubName: Full=Uncharacterized protein {ECO:0000313|EMBL:CBI24236.3};	--	--	Domain of unknown function (DUF4228)
Cluster-10658.46870	TRUE	TRUE	TRUE	--	--	--	--	--	--	--
Cluster-10658.103978	TRUE	TRUE	TRUE	K14652 3,4-dihydroxy 2-butanone 4-phosphate synthase / GTP cyclohydrolase II [EC:4.1.99.12 3.5.4.25] | (RefSeq) bifunctional riboflavin biosynthesis protein RIBA 1, chloroplastic (A)	PREDICTED: bifunctional riboflavin biosynthesis protein RIBA 1, chloroplastic [Daucus carota subsp. sativus]	RecName: Full=Bifunctional riboflavin biosynthesis protein RIBA 1, chloroplastic; Short=AtRIBA1; Includes: RecName: Full=3,4-dihydroxy-2-butanone 4-phosphate synthase; Short=DHBP synthase; EC=4.1.99.12; Includes: RecName: Full=GTP cyclohydrolase-2; EC=3.5.4.25; AltName: Full=GTP cyclohydrolase II; Flags: Precursor;	SubName: Full=Uncharacterized protein {ECO:0000313|EMBL:KZN09114.1};	Bifunctional GTP cyclohydrolase II/3,4-dihydroxy-2butanone-4-phosphate synthase	GO:0009507,chloroplast; GO:0009570,chloroplast stroma; GO:0016020,membrane; GO:0008686,3,4-dihydroxy-2-butanone-4-phosphate synthase activity; GO:0005525,GTP binding; GO:0003935,GTP cyclohydrolase II activity; GO:0046872,metal ion binding; GO:0009231,riboflavin biosynthetic process	GTP cyclohydrolase II
Cluster-10658.38827	TRUE	TRUE	TRUE	K12130 pseudo-response regulator 5 | (RefSeq) two-component response regulator-like APRR5 (A)	PREDICTED: zinc finger protein CONSTANS-LIKE 6 [Daucus carota subsp. sativus]	RecName: Full=Zinc finger protein CONSTANS-LIKE 7;	SubName: Full=Uncharacterized protein {ECO:0000313|EMBL:KZN02522.1};	GATA-4/5/6 transcription factors	GO:0005730,nucleolus; GO:0003700,DNA-binding transcription factor activity; GO:0008270,zinc ion binding; GO:0045893,positive regulation of transcription, DNA-templated; GO:0006355,regulation of transcription, DNA-templated; GO:0010223,secondary shoot formation; GO:0009641,shade avoidance	CCT motif
Cluster-10658.88715	TRUE	TRUE	TRUE	K15333 tRNA guanosine-2'-O-methyltransferase [EC:2.1.1.34] | (RefSeq) uncharacterized protein LOC104224633 (A)	PREDICTED: subtilisin-like protease SBT4.10 [Daucus carota subsp. sativus]	RecName: Full=Subtilisin-like protease SBT1.6 {ECO:0000303|PubMed:16193095}; EC=3.4.21.- {ECO:0000305}; AltName: Full=Subtilase subfamily 1 member 6 {ECO:0000303|PubMed:16193095}; Short=AtSBT1.6 {ECO:0000303|PubMed:16193095}; AltName: Full=Subtilisin-like serine protease 2 {ECO:0000303|PubMed:12702015}; Short=At-SLP2 {ECO:0000303|PubMed:12702015}; Flags: Precursor;	SubName: Full=Uncharacterized protein {ECO:0000313|EMBL:OAY61029.1};	--	GO:0016020,membrane; GO:0004252,serine-type endopeptidase activity; GO:0008236,serine-type peptidase activity; GO:0009827,plant-type cell wall modification	PA domain
Cluster-10658.88451	TRUE	TRUE	TRUE	K00799 glutathione S-transferase [EC:2.5.1.18] | (RefSeq) probable glutathione S-transferase (A)	PREDICTED: probable glutathione S-transferase [Daucus carota subsp. sativus]	RecName: Full=Probable glutathione S-transferase; EC=2.5.1.18; AltName: Full=Auxin-induced protein PGNT35/PCNT111;	SubName: Full=Uncharacterized protein {ECO:0000313|EMBL:KZN03392.1};	Glutathione S-transferase	GO:0004364,glutathione transferase activity; GO:0009734,auxin-activated signaling pathway	Glutathione S-transferase N-terminal domain
Cluster-10658.63643	TRUE	TRUE	TRUE	K18045 tyrosine-protein phosphatase SIW14 [EC:3.1.3.48] | (RefSeq) probable tyrosine-protein phosphatase At1g05000 isoform X1 (A)	PREDICTED: probable tyrosine-protein phosphatase At1g05000 isoform X2 [Daucus carota subsp. sativus]	RecName: Full=Probable tyrosine-protein phosphatase DSP4 {ECO:0000305}; EC=3.1.3.48 {ECO:0000255|PROSITE-ProRule:PRU10044}; AltName: Full=Protein PLANT AND FUNGI ATYPICAL DUAL-SPECIFICITY PHOSPHATASE 4 {ECO:0000303|PubMed:21409566}; Short=AtPFA-DSP4 {ECO:0000303|PubMed:21409566};	SubName: Full=Uncharacterized protein {ECO:0000313|EMBL:KZM96498.1};	Predicted protein tyrosine phosphatase	GO:0005737,cytoplasm; GO:0004725,protein tyrosine phosphatase activity; GO:0006952,defense response; GO:1900424,regulation of defense response to bacterium	Protein-tyrosine phosphatase
Cluster-10658.197319	TRUE	TRUE	TRUE	--	hypothetical protein CCACVL1_07485 [Corchorus capsularis]	RecName: Full=Protein IDA; AltName: Full=Protein INFLORESCENCE DEFICIENT IN ABSCISSION; Flags: Precursor;	SubName: Full=Uncharacterized protein {ECO:0000313|EMBL:CCB50958.1};	--	GO:0048046,apoplast; GO:0005576,extracellular region; GO:0005615,extracellular space; GO:0005102,signaling receptor binding; GO:0010227,floral organ abscission; GO:0010102,lateral root morphogenesis; GO:0045490,pectin catabolic process; GO:0010468,regulation of gene expression; GO:0009723,response to ethylene	--
Cluster-10658.70997	TRUE	TRUE	TRUE	K08913 light-harvesting complex II chlorophyll a/b binding protein 2 | (RefSeq) chlorophyll a-b binding protein 151, chloroplastic (A)	hypothetical protein B456_001G099100 [Gossypium raimondii]	RecName: Full=Chlorophyll a-b binding protein 37, chloroplastic; AltName: Full=LHCII type I CAB-37; Short=LHCP; Flags: Precursor;	SubName: Full=Uncharacterized protein {ECO:0000313|EMBL:KJB08707.1};	--	GO:0009535,chloroplast thylakoid membrane; GO:0016021,integral component of membrane; GO:0009522,photosystem I; GO:0009523,photosystem II; GO:0016168,chlorophyll binding; GO:0046872,metal ion binding; GO:0009765,photosynthesis, light harvesting; GO:0018298,protein-chromophore linkage	SAM domain (Sterile alpha motif)
Cluster-10658.88301	TRUE	TRUE	TRUE	K09840 9-cis-epoxycarotenoid dioxygenase [EC:1.13.11.51] | (RefSeq) 9-cis-epoxycarotenoid dioxygenase NCED1, chloroplastic-like (A)	9-cis-epoxycarotenoid dioxygenase NCED1, chloroplastic-like [Daucus carota subsp. sativus]	RecName: Full=9-cis-epoxycarotenoid dioxygenase NCED1, chloroplastic; EC=1.13.11.51; AltName: Full=PvNCED1; Flags: Precursor;	SubName: Full=Putative 9-cis epoxycarotenoid dioxygenase {ECO:0000313|EMBL:ABB52079.1};	Beta, beta-carotene 15,15'-dioxygenase and related enzymes	GO:0009535,chloroplast thylakoid membrane; GO:0045549,9-cis-epoxycarotenoid dioxygenase activity; GO:0046872,metal ion binding; GO:0009688,abscisic acid biosynthetic process	Retinal pigment epithelial membrane protein
Cluster-10658.72794	TRUE	TRUE	TRUE	K01184 polygalacturonase [EC:3.2.1.15] | (RefSeq) polygalacturonase-like (A)	PREDICTED: polygalacturonase-like [Daucus carota subsp. sativus]	RecName: Full=Polygalacturonase; Short=PG; EC=3.2.1.15; AltName: Full=Pectinase; Flags: Precursor;	SubName: Full=Uncharacterized protein {ECO:0000313|EMBL:KZM82063.1};	--	GO:0005618,cell wall; GO:0005576,extracellular region; GO:0004650,polygalacturonase activity; GO:0005975,carbohydrate metabolic process; GO:0071555,cell wall organization; GO:0009835,fruit ripening	Pectate lyase superfamily protein
Cluster-10658.91202	TRUE	TRUE	TRUE	K00901 diacylglycerol kinase (ATP) [EC:2.7.1.107] | (RefSeq) diacylglycerol kinase 5 (A)	diacylglycerol kinase 5 [Sesamum indicum]	RecName: Full=Diacylglycerol kinase 5; Short=AtDGK5; Short=DAG kinase 5; EC=2.7.1.107; AltName: Full=Diglyceride kinase 5; Short=DGK 5;	SubName: Full=Uncharacterized protein {ECO:0000313|EnsemblPlants:PGSC0003DMT400055775};	Diacylglycerol kinase	GO:0005524,ATP binding; GO:0004143,diacylglycerol kinase activity; GO:0003951,NAD+ kinase activity; GO:0006952,defense response; GO:0007205,protein kinase C-activating G protein-coupled receptor signaling pathway	--
Cluster-10658.112345	TRUE	TRUE	TRUE	--	PREDICTED: zinc finger AN1 domain-containing stress-associated protein 12 [Daucus carota subsp. sativus]	RecName: Full=Zinc finger AN1 domain-containing stress-associated protein 12; Short=AtSAP12;	SubName: Full=Uncharacterized protein {ECO:0000313|EMBL:KZM98656.1};	Predicted Zn-finger protein	GO:0008270,zinc ion binding; GO:0009737,response to abscisic acid; GO:0010200,response to chitin	AN1-like Zinc finger
Cluster-10658.129275	TRUE	TRUE	TRUE	K21396 ATP-binding cassette, subfamily G (WHITE), eye pigment precursor transporter | (RefSeq) ABC transporter G family member 9-like (A)	PREDICTED: ABC transporter G family member 29 [Daucus carota subsp. sativus]	RecName: Full=ABC transporter G family member 35; Short=ABC transporter ABCG.35; Short=AtABCG35; AltName: Full=Pleiotropic drug resistance protein 7;	SubName: Full=Uncharacterized protein {ECO:0000313|EMBL:CBI36070.3};	Pleiotropic drug resistance proteins (PDR1-15), ABC superfamily	GO:0009507,chloroplast; GO:0016021,integral component of membrane; GO:0016020,membrane; GO:0005886,plasma membrane; GO:0005524,ATP binding; GO:0042626,ATPase activity, coupled to transmembrane movement of substances; GO:0006855,drug transmembrane transport	Zeta toxin
Cluster-10658.129292	TRUE	TRUE	TRUE	K12175 COP9 signalosome complex subunit 1 | (RefSeq) probable methyltransferase PMT15 (A)	PREDICTED: probable methyltransferase PMT2 [Nicotiana tomentosiformis]	RecName: Full=Probable methyltransferase PMT2; EC=2.1.1.-;	SubName: Full=probable methyltransferase PMT2 {ECO:0000313|RefSeq:XP_016505881.1, ECO:0000313|RefSeq:XP_016505889.1};	--	GO:0005737,cytoplasm; GO:0005768,endosome; GO:0005794,Golgi apparatus; GO:0000139,Golgi membrane; GO:0016021,integral component of membrane; GO:0016020,membrane; GO:0005802,trans-Golgi network; GO:0008757,S-adenosylmethionine-dependent methyltransferase activity; GO:0032259,methylation	Methyltransferase domain

## Sheet: S4
Different expression transcription factors in A-J vs B-J
ID	Family	Category	regulated
Cluster-10658.20296	AP2/ERF-AP2	TF	up
Cluster-10658.4643	AP2/ERF-AP2	TF	down
Cluster-10658.47824	AP2/ERF-AP2	TF	up
Cluster-10658.101394	AP2/ERF-ERF	TF	up
Cluster-10658.102065	AP2/ERF-ERF	TF	up
Cluster-10658.104553	AP2/ERF-ERF	TF	up
Cluster-10658.105481	AP2/ERF-ERF	TF	up
Cluster-10658.106165	AP2/ERF-ERF	TF	up
Cluster-10658.106262	AP2/ERF-ERF	TF	up
Cluster-10658.106314	AP2/ERF-ERF	TF	up
Cluster-10658.106703	AP2/ERF-ERF	TF	up
Cluster-10658.110068	AP2/ERF-ERF	TF	up
Cluster-10658.111583	AP2/ERF-ERF	TF	up
Cluster-10658.113379	AP2/ERF-ERF	TF	up
Cluster-10658.162234	AP2/ERF-ERF	TF	up
Cluster-10658.16317	AP2/ERF-ERF	TF	down
Cluster-10658.182861	AP2/ERF-ERF	TF	down
Cluster-10658.190681	AP2/ERF-ERF	TF	down
Cluster-10658.192676	AP2/ERF-ERF	TF	down
Cluster-10658.192969	AP2/ERF-ERF	TF	down
Cluster-10658.193636	AP2/ERF-ERF	TF	down
Cluster-10658.29136	AP2/ERF-ERF	TF	down
Cluster-10658.3248	AP2/ERF-ERF	TF	up
Cluster-10658.42103	AP2/ERF-ERF	TF	up
Cluster-10658.42614	AP2/ERF-ERF	TF	up
Cluster-10658.43462	AP2/ERF-ERF	TF	down
Cluster-10658.65727	AP2/ERF-ERF	TF	up
Cluster-10658.69621	AP2/ERF-ERF	TF	down
Cluster-10658.77341	AP2/ERF-ERF	TF	up
Cluster-10658.83126	AP2/ERF-ERF	TF	up
Cluster-10658.83323	AP2/ERF-ERF	TF	up
Cluster-10658.83614	AP2/ERF-ERF	TF	up
Cluster-10658.85184	AP2/ERF-ERF	TF	up
Cluster-10658.90849	AP2/ERF-ERF	TF	up
Cluster-10658.91123	AP2/ERF-ERF	TF	up
Cluster-10658.97019	AP2/ERF-ERF	TF	up
Cluster-10658.99843	AP2/ERF-ERF	TF	up
Cluster-13476.0	AP2/ERF-ERF	TF	down
Cluster-5208.0	AP2/ERF-ERF	TF	up
Cluster-7148.0	AP2/ERF-ERF	TF	up
Cluster-10658.108617	B3	TF	up
Cluster-10658.131516	B3	TF	down
Cluster-10658.159392	B3	TF	up
Cluster-10658.31804	B3	TF	down
Cluster-10658.49810	B3	TF	up
Cluster-11400.0	B3	TF	down
Cluster-10658.119553	B3-ARF	TF	down
Cluster-10658.27158	B3-ARF	TF	down
Cluster-10658.130418	BBR-BPC	TF	up
Cluster-10658.79906	BBR-BPC	TF	up
Cluster-10658.89055	BES1	TF	up
Cluster-10658.11408	bHLH	TF	down
Cluster-10658.116634	bHLH	TF	down
Cluster-10658.141609	bHLH	TF	down
Cluster-10658.144061	bHLH	TF	up
Cluster-10658.150548	bHLH	TF	down
Cluster-10658.15072	bHLH	TF	down
Cluster-10658.155100	bHLH	TF	up
Cluster-10658.165682	bHLH	TF	down
Cluster-10658.166977	bHLH	TF	down
Cluster-10658.172619	bHLH	TF	down
Cluster-10658.189101	bHLH	TF	down
Cluster-10658.192673	bHLH	TF	down
Cluster-10658.197924	bHLH	TF	down
Cluster-10658.24953	bHLH	TF	up
Cluster-10658.5273	bHLH	TF	down
Cluster-10658.57927	bHLH	TF	up
Cluster-10658.64081	bHLH	TF	up
Cluster-10658.83164	bHLH	TF	down
Cluster-10658.85630	bHLH	TF	down
Cluster-10658.89405	bHLH	TF	up
Cluster-10658.97141	bHLH	TF	up
Cluster-10658.99175	bHLH	TF	down
Cluster-10658.114312	bZIP	TF	up
Cluster-10658.114673	bZIP	TF	up
Cluster-10658.171263	bZIP	TF	down
Cluster-10658.172106	bZIP	TF	up
Cluster-10658.52645	bZIP	TF	down
Cluster-10658.52708	bZIP	TF	up
Cluster-10658.52709	bZIP	TF	down
Cluster-10658.58221	bZIP	TF	up
Cluster-10658.60732	bZIP	TF	up
Cluster-10658.64777	bZIP	TF	up
Cluster-10658.64778	bZIP	TF	up
Cluster-10658.85618	bZIP	TF	up
Cluster-10658.95752	bZIP	TF	up
Cluster-10658.97879	bZIP	TF	up
Cluster-15102.0	bZIP	TF	down
Cluster-10658.33414	C2C2-CO-like	TF	down
Cluster-10658.73492	C2C2-CO-like	TF	up
Cluster-10658.101124	C2C2-Dof	TF	up
Cluster-10658.149154	C2C2-Dof	TF	up
Cluster-10658.177963	C2C2-Dof	TF	down
Cluster-10658.189052	C2C2-Dof	TF	down
Cluster-10658.30025	C2C2-Dof	TF	down
Cluster-10658.83789	C2C2-Dof	TF	down
Cluster-10658.120563	C2C2-GATA	TF	up
Cluster-10658.35723	C2C2-GATA	TF	up
Cluster-10658.41600	C2C2-GATA	TF	down
Cluster-10658.4673	C2C2-GATA	TF	down
Cluster-10658.89680	C2C2-GATA	TF	up
Cluster-10658.105682	C2C2-LSD	TF	up
Cluster-10658.48318	C2C2-LSD	TF	down
Cluster-10658.48801	C2C2-LSD	TF	up
Cluster-10658.104483	C2H2	TF	up
Cluster-10658.104921	C2H2	TF	up
Cluster-10658.109773	C2H2	TF	up
Cluster-10658.110631	C2H2	TF	up
Cluster-10658.125804	C2H2	TF	up
Cluster-10658.135349	C2H2	TF	up
Cluster-10658.135706	C2H2	TF	up
Cluster-10658.138338	C2H2	TF	down
Cluster-10658.145985	C2H2	TF	up
Cluster-10658.190631	C2H2	TF	down
Cluster-10658.3374	C2H2	TF	up
Cluster-10658.36370	C2H2	TF	down
Cluster-10658.57309	C2H2	TF	up
Cluster-10658.63469	C2H2	TF	down
Cluster-10658.72282	C2H2	TF	up
Cluster-10658.76300	C2H2	TF	down
Cluster-10658.83906	C2H2	TF	up
Cluster-10658.85175	C2H2	TF	up
Cluster-10658.90458	C2H2	TF	down
Cluster-10658.91449	C2H2	TF	up
Cluster-10658.91458	C2H2	TF	up
Cluster-10658.97094	C2H2	TF	up
Cluster-10658.97095	C2H2	TF	up
Cluster-10658.100388	C3H	TF	down
Cluster-10658.128651	C3H	TF	down
Cluster-10658.132155	C3H	TF	down
Cluster-10658.15498	C3H	TF	up
Cluster-10658.162273	C3H	TF	down
Cluster-10658.16653	C3H	TF	down
Cluster-10658.176261	C3H	TF	down
Cluster-10658.188180	C3H	TF	up
Cluster-10658.56239	C3H	TF	up
Cluster-10658.57029	C3H	TF	down
Cluster-10658.63445	C3H	TF	up
Cluster-10658.74295	C3H	TF	down
Cluster-10658.78784	C3H	TF	up
Cluster-10658.83513	C3H	TF	up
Cluster-10658.98498	C3H	TF	up
Cluster-10658.98503	C3H	TF	up
Cluster-10658.116032	CSD	TF	down
Cluster-10658.124598	E2F-DP	TF	down
Cluster-10658.104546	EIL	TF	up
Cluster-10658.1389	FAR1	TF	down
Cluster-10658.154775	FAR1	TF	down
Cluster-10658.91244	GARP-ARR-B	TF	down
Cluster-10658.125085	GARP-G2-like	TF	up
Cluster-10658.128074	GARP-G2-like	TF	up
Cluster-10658.131380	GARP-G2-like	TF	up
Cluster-10658.88350	GARP-G2-like	TF	down
Cluster-10658.170214	GRAS	TF	down
Cluster-10658.25331	GRAS	TF	down
Cluster-10658.57794	GRAS	TF	down
Cluster-10658.76026	GRAS	TF	up
Cluster-10658.99718	GRAS	TF	up
Cluster-6815.0	GRAS	TF	down
Cluster-10658.111905	GRF	TF	up
Cluster-10658.32806	GRF	TF	up
Cluster-10658.120657	HB-HD-ZIP	TF	down
Cluster-10658.123588	HB-HD-ZIP	TF	down
Cluster-10658.134589	HB-HD-ZIP	TF	up
Cluster-10658.145843	HB-HD-ZIP	TF	up
Cluster-10658.194081	HB-HD-ZIP	TF	down
Cluster-10658.195181	HB-HD-ZIP	TF	up
Cluster-10658.40146	HB-HD-ZIP	TF	down
Cluster-10658.63378	HB-HD-ZIP	TF	down
Cluster-10658.66279	HB-HD-ZIP	TF	up
Cluster-10658.72130	HB-HD-ZIP	TF	up
Cluster-10658.78279	HB-HD-ZIP	TF	down
Cluster-10658.96853	HB-HD-ZIP	TF	up
Cluster-10658.123611	HB-other	TF	down
Cluster-10658.131824	HB-other	TF	down
Cluster-10658.59871	HB-other	TF	up
Cluster-10658.38682	HB-WOX	TF	down
Cluster-10658.85580	HB-WOX	TF	down
Cluster-10658.90503	HB-WOX	TF	down
Cluster-10658.149727	HRT	TF	down
Cluster-10658.172381	HRT	TF	down
Cluster-10658.52332	HRT	TF	down
Cluster-10658.78536	HRT	TF	down
Cluster-10658.89261	HRT	TF	down
Cluster-10658.94486	HRT	TF	down
Cluster-10658.103433	HSF	TF	down
Cluster-10658.105937	HSF	TF	up
Cluster-10658.111473	HSF	TF	up
Cluster-10658.112810	HSF	TF	up
Cluster-10658.113845	HSF	TF	down
Cluster-10658.120741	HSF	TF	down
Cluster-10658.120742	HSF	TF	down
Cluster-10658.121718	HSF	TF	up
Cluster-10658.149507	HSF	TF	down
Cluster-10658.151419	HSF	TF	up
Cluster-10658.45334	HSF	TF	up
Cluster-10658.98111	HSF	TF	down
Cluster-10658.99550	HSF	TF	up
Cluster-10658.99552	HSF	TF	up
Cluster-10658.149011	LIM	TF	up
Cluster-10658.63306	LOB	TF	down
Cluster-10658.108640	MADS-MIKC	TF	up
Cluster-10658.113397	MADS-MIKC	TF	up
Cluster-10658.114432	MADS-MIKC	TF	up
Cluster-10658.131353	MADS-MIKC	TF	up
Cluster-10658.111955	MADS-M-type	TF	up
Cluster-10658.197935	MADS-M-type	TF	up
Cluster-10658.40879	MADS-M-type	TF	up
Cluster-10658.91854	MADS-M-type	TF	up
Cluster-10658.100333	MYB	TF	up
Cluster-10658.114208	MYB	TF	up
Cluster-10658.118329	MYB	TF	down
Cluster-10658.119608	MYB	TF	up
Cluster-10658.121207	MYB	TF	up
Cluster-10658.125393	MYB	TF	up
Cluster-10658.139013	MYB	TF	down
Cluster-10658.153286	MYB	TF	up
Cluster-10658.190241	MYB	TF	down
Cluster-10658.31559	MYB	TF	up
Cluster-10658.46515	MYB	TF	up
Cluster-10658.79590	MYB	TF	up
Cluster-10658.82531	MYB	TF	up
Cluster-10658.83335	MYB	TF	up
Cluster-10658.83768	MYB	TF	up
Cluster-10658.89296	MYB	TF	up
Cluster-10658.90303	MYB	TF	up
Cluster-10658.91054	MYB	TF	up
Cluster-10658.128513	MYB-related	TF	up
Cluster-10658.130729	MYB-related	TF	up
Cluster-10658.130998	MYB-related	TF	up
Cluster-10658.14005	MYB-related	TF	down
Cluster-10658.14143	MYB-related	TF	up
Cluster-10658.14918	MYB-related	TF	up
Cluster-10658.177306	MYB-related	TF	down
Cluster-10658.179357	MYB-related	TF	up
Cluster-10658.32668	MYB-related	TF	up
Cluster-10658.75163	MYB-related	TF	up
Cluster-10658.79083	MYB-related	TF	up
Cluster-10658.87666	MYB-related	TF	up
Cluster-10658.91227	MYB-related	TF	down
Cluster-10658.9605	MYB-related	TF	up
Cluster-10658.102087	NAC	TF	down
Cluster-10658.116105	NAC	TF	up
Cluster-10658.121194	NAC	TF	up
Cluster-10658.121689	NAC	TF	up
Cluster-10658.122439	NAC	TF	up
Cluster-10658.133699	NAC	TF	down
Cluster-10658.134681	NAC	TF	up
Cluster-10658.144898	NAC	TF	up
Cluster-10658.151802	NAC	TF	up
Cluster-10658.159437	NAC	TF	up
Cluster-10658.84551	NAC	TF	up
Cluster-10658.87051	NAC	TF	up
Cluster-10658.87054	NAC	TF	up
Cluster-10658.88181	NAC	TF	up
Cluster-10658.88439	NAC	TF	down
Cluster-10658.98362	NAC	TF	up
Cluster-12831.0	NAC	TF	down
Cluster-14058.0	NAC	TF	down
Cluster-10658.113459	NF-X1	TF	up
Cluster-10658.174238	NF-YA	TF	up
Cluster-10658.10831	OFP	TF	down
Cluster-10658.14915	OFP	TF	down
Cluster-10658.166033	OFP	TF	up
Cluster-10658.188121	OFP	TF	up
Cluster-10658.47853	OFP	TF	down
Cluster-10658.188618	PLATZ	TF	down
Cluster-10658.102807	RWP-RK	TF	up
Cluster-10658.112143	SBP	TF	up
Cluster-10658.12575	SBP	TF	down
Cluster-10658.126822	SBP	TF	down
Cluster-10658.140580	SBP	TF	down
Cluster-10658.147695	SBP	TF	down
Cluster-10658.162101	SBP	TF	down
Cluster-10658.186282	SBP	TF	down
Cluster-10658.193662	SBP	TF	down
Cluster-10658.193663	SBP	TF	down
Cluster-10658.43886	SBP	TF	down
Cluster-10658.68113	SBP	TF	down
Cluster-10658.76934	SBP	TF	down
Cluster-10658.78571	SBP	TF	up
Cluster-10658.93506	SBP	TF	down
Cluster-10658.99544	SBP	TF	down
Cluster-10658.189572	SRS	TF	down
Cluster-10658.84256	SRS	TF	up
Cluster-10658.104593	TCP	TF	up
Cluster-10658.62487	TCP	TF	up
Cluster-10658.106169	Tify	TF	down
Cluster-10658.179808	Tify	TF	up
Cluster-10658.30010	Tify	TF	up
Cluster-10658.31086	Tify	TF	down
Cluster-10658.5	Tify	TF	up
Cluster-10658.94227	Tify	TF	up
Cluster-10658.103525	Trihelix	TF	down
Cluster-10658.125373	Trihelix	TF	up
Cluster-10658.131809	Trihelix	TF	up
Cluster-10658.137209	Trihelix	TF	down
Cluster-10658.84212	Trihelix	TF	down
Cluster-10658.90804	Trihelix	TF	down
Cluster-10658.100036	WRKY	TF	up
Cluster-10658.100180	WRKY	TF	up
Cluster-10658.100184	WRKY	TF	up
Cluster-10658.102894	WRKY	TF	up
Cluster-10658.103797	WRKY	TF	up
Cluster-10658.103858	WRKY	TF	up
Cluster-10658.104045	WRKY	TF	up
Cluster-10658.110024	WRKY	TF	up
Cluster-10658.114032	WRKY	TF	up
Cluster-10658.115997	WRKY	TF	up
Cluster-10658.116385	WRKY	TF	up
Cluster-10658.119426	WRKY	TF	up
Cluster-10658.121398	WRKY	TF	up
Cluster-10658.121731	WRKY	TF	down
Cluster-10658.122052	WRKY	TF	up
Cluster-10658.124100	WRKY	TF	up
Cluster-10658.125861	WRKY	TF	up
Cluster-10658.131714	WRKY	TF	up
Cluster-10658.132598	WRKY	TF	up
Cluster-10658.135062	WRKY	TF	up
Cluster-10658.145413	WRKY	TF	up
Cluster-10658.186698	WRKY	TF	up
Cluster-10658.21421	WRKY	TF	up
Cluster-10658.22908	WRKY	TF	up
Cluster-10658.27509	WRKY	TF	down
Cluster-10658.33	WRKY	TF	up
Cluster-10658.45045	WRKY	TF	up
Cluster-10658.45046	WRKY	TF	up
Cluster-10658.45047	WRKY	TF	up
Cluster-10658.45336	WRKY	TF	up
Cluster-10658.57373	WRKY	TF	up
Cluster-10658.75869	WRKY	TF	up
Cluster-10658.79195	WRKY	TF	up
Cluster-10658.79773	WRKY	TF	up
Cluster-10658.83553	WRKY	TF	up
Cluster-10658.85717	WRKY	TF	up
Cluster-10658.86833	WRKY	TF	up
Cluster-10658.87591	WRKY	TF	down
Cluster-10658.90392	WRKY	TF	up
Cluster-10658.91693	WRKY	TF	up
Cluster-10658.93867	WRKY	TF	up
Cluster-10658.94223	WRKY	TF	up
Cluster-10658.95305	WRKY	TF	down
Cluster-10658.97762	WRKY	TF	up
Cluster-10658.98217	WRKY	TF	up
Cluster-10658.93112	zf-HD	TF	down

## Sheet: S5
Different expression transcription factors in A-L vs B-L
ID	Family	Category	regulated
Cluster-10658.47824	AP2/ERF-AP2	TF	up
Cluster-10658.100365	AP2/ERF-ERF	TF	up
Cluster-10658.101394	AP2/ERF-ERF	TF	up
Cluster-10658.102065	AP2/ERF-ERF	TF	up
Cluster-10658.104553	AP2/ERF-ERF	TF	up
Cluster-10658.105481	AP2/ERF-ERF	TF	up
Cluster-10658.106165	AP2/ERF-ERF	TF	up
Cluster-10658.106703	AP2/ERF-ERF	TF	up
Cluster-10658.106908	AP2/ERF-ERF	TF	up
Cluster-10658.110707	AP2/ERF-ERF	TF	up
Cluster-10658.126997	AP2/ERF-ERF	TF	up
Cluster-10658.132372	AP2/ERF-ERF	TF	down
Cluster-10658.156475	AP2/ERF-ERF	TF	up
Cluster-10658.16374	AP2/ERF-ERF	TF	up
Cluster-10658.42614	AP2/ERF-ERF	TF	up
Cluster-10658.50339	AP2/ERF-ERF	TF	up
Cluster-10658.65727	AP2/ERF-ERF	TF	up
Cluster-10658.77341	AP2/ERF-ERF	TF	up
Cluster-10658.83126	AP2/ERF-ERF	TF	up
Cluster-10658.83323	AP2/ERF-ERF	TF	up
Cluster-10658.87377	AP2/ERF-ERF	TF	up
Cluster-10658.88680	AP2/ERF-ERF	TF	down
Cluster-10658.91123	AP2/ERF-ERF	TF	up
Cluster-12740.0	AP2/ERF-ERF	TF	up
Cluster-10658.155101	AP2/ERF-RAV	TF	up
Cluster-10658.34623	B3	TF	up
Cluster-10658.96648	B3	TF	up
Cluster-10658.119553	B3-ARF	TF	down
Cluster-10658.105035	bHLH	TF	up
Cluster-10658.110255	bHLH	TF	up
Cluster-10658.127311	bHLH	TF	down
Cluster-10658.131045	bHLH	TF	down
Cluster-10658.144061	bHLH	TF	up
Cluster-10658.180411	bHLH	TF	down
Cluster-10658.19728	bHLH	TF	down
Cluster-10658.24953	bHLH	TF	up
Cluster-10658.36590	bHLH	TF	down
Cluster-10658.44550	bHLH	TF	down
Cluster-10658.62934	bHLH	TF	down
Cluster-10658.67337	bHLH	TF	down
Cluster-10658.80673	bHLH	TF	up
Cluster-10658.83391	bHLH	TF	up
Cluster-10658.84979	bHLH	TF	down
Cluster-10658.89405	bHLH	TF	up
Cluster-10658.97141	bHLH	TF	up
Cluster-10658.99904	bHLH	TF	up
Cluster-10658.100379	bZIP	TF	up
Cluster-10658.51662	bZIP	TF	down
Cluster-10658.83533	bZIP	TF	up
Cluster-10658.98528	bZIP	TF	up
Cluster-23732.1	bZIP	TF	up
Cluster-10658.141352	C2C2-CO-like	TF	down
Cluster-10658.33414	C2C2-CO-like	TF	down
Cluster-10658.65570	C2C2-CO-like	TF	down
Cluster-10658.65571	C2C2-CO-like	TF	down
Cluster-10658.73492	C2C2-CO-like	TF	up
Cluster-10658.149154	C2C2-Dof	TF	up
Cluster-10658.31448	C2C2-Dof	TF	up
Cluster-10658.37434	C2C2-Dof	TF	down
Cluster-10658.67482	C2C2-Dof	TF	up
Cluster-10658.120563	C2C2-GATA	TF	up
Cluster-10658.63899	C2C2-GATA	TF	up
Cluster-10658.104483	C2H2	TF	up
Cluster-10658.104921	C2H2	TF	up
Cluster-10658.109773	C2H2	TF	up
Cluster-10658.110631	C2H2	TF	up
Cluster-10658.120869	C2H2	TF	up
Cluster-10658.135349	C2H2	TF	up
Cluster-10658.144451	C2H2	TF	up
Cluster-10658.145056	C2H2	TF	down
Cluster-10658.145985	C2H2	TF	up
Cluster-10658.57309	C2H2	TF	up
Cluster-10658.5919	C2H2	TF	up
Cluster-10658.91449	C2H2	TF	up
Cluster-10658.95021	C2H2	TF	up
Cluster-10658.97094	C2H2	TF	up
Cluster-10658.97095	C2H2	TF	up
Cluster-10658.161114	C3H	TF	up
Cluster-10658.161653	C3H	TF	up
Cluster-10658.176538	C3H	TF	down
Cluster-10658.43118	C3H	TF	up
Cluster-10658.78784	C3H	TF	up
Cluster-10658.98503	C3H	TF	up
Cluster-10658.3024	FAR1	TF	down
Cluster-10658.131380	GARP-G2-like	TF	up
Cluster-10658.134516	GARP-G2-like	TF	down
Cluster-10658.87940	GARP-G2-like	TF	up
Cluster-10658.134978	GRAS	TF	up
Cluster-10658.73024	GRAS	TF	up
Cluster-10658.99718	GRAS	TF	up
Cluster-17894.0	GRAS	TF	up
Cluster-3328.0	GRAS	TF	up
Cluster-10658.198593	HB-HD-ZIP	TF	up
Cluster-10658.63378	HB-HD-ZIP	TF	up
Cluster-10658.66279	HB-HD-ZIP	TF	up
Cluster-10658.96853	HB-HD-ZIP	TF	up
Cluster-10658.27585	HB-other	TF	up
Cluster-10658.126561	HB-WOX	TF	up
Cluster-10658.90503	HB-WOX	TF	down
Cluster-10658.100783	HSF	TF	up
Cluster-10658.100784	HSF	TF	up
Cluster-10658.105937	HSF	TF	up
Cluster-10658.108870	HSF	TF	up
Cluster-10658.112538	HSF	TF	up
Cluster-10658.149506	HSF	TF	down
Cluster-10658.149507	HSF	TF	down
Cluster-10658.175361	HSF	TF	up
Cluster-10658.30588	HSF	TF	down
Cluster-10658.35257	HSF	TF	up
Cluster-10658.99550	HSF	TF	up
Cluster-10658.26505	LOB	TF	up
Cluster-10658.139299	MADS-MIKC	TF	down
Cluster-4574.0	MADS-MIKC	TF	up
Cluster-10658.73511	MADS-M-type	TF	down
Cluster-10012.0	MYB	TF	up
Cluster-10658.100333	MYB	TF	up
Cluster-10658.114208	MYB	TF	up
Cluster-10658.116950	MYB	TF	up
Cluster-10658.121207	MYB	TF	up
Cluster-10658.125393	MYB	TF	up
Cluster-10658.129123	MYB	TF	up
Cluster-10658.138815	MYB	TF	up
Cluster-10658.41111	MYB	TF	up
Cluster-10658.72799	MYB	TF	up
Cluster-10658.79590	MYB	TF	up
Cluster-10658.89296	MYB	TF	up
Cluster-10658.90303	MYB	TF	up
Cluster-10658.91054	MYB	TF	up
Cluster-10658.93994	MYB	TF	up
Cluster-10658.96745	MYB	TF	up
Cluster-10658.99483	MYB	TF	up
Cluster-7978.0	MYB	TF	down
Cluster-10658.103384	MYB-related	TF	up
Cluster-10658.107782	MYB-related	TF	up
Cluster-10658.68878	MYB-related	TF	up
Cluster-10658.77755	MYB-related	TF	up
Cluster-10658.80377	MYB-related	TF	up
Cluster-10658.103214	NAC	TF	up
Cluster-10658.104993	NAC	TF	up
Cluster-10658.56203	NAC	TF	up
Cluster-10658.87054	NAC	TF	up
Cluster-10658.94923	NAC	TF	up
Cluster-10658.97116	NAC	TF	up
Cluster-10658.97126	NAC	TF	up
Cluster-10658.97182	NAC	TF	up
Cluster-10658.97183	NAC	TF	up
Cluster-10658.165083	NF-YA	TF	down
Cluster-10658.89015	NF-YA	TF	up
Cluster-10658.188121	OFP	TF	up
Cluster-10658.47853	OFP	TF	down
Cluster-10658.112143	SBP	TF	up
Cluster-10658.70052	SBP	TF	up
Cluster-10658.71231	SRS	TF	up
Cluster-10658.19300	TCP	TF	down
Cluster-10658.61346	TCP	TF	down
Cluster-10658.106169	Tify	TF	up
Cluster-10658.62515	Tify	TF	up
Cluster-10658.89120	Tify	TF	up
Cluster-10658.98076	Tify	TF	up
Cluster-10658.98077	Tify	TF	up
Cluster-10658.98083	Tify	TF	up
Cluster-10658.125373	Trihelix	TF	up
Cluster-10658.105012	TUB	TF	up
Cluster-10658.75074	TUB	TF	up
Cluster-10658.79623	TUB	TF	down
Cluster-10658.100036	WRKY	TF	up
Cluster-10658.100180	WRKY	TF	up
Cluster-10658.100184	WRKY	TF	up
Cluster-10658.100743	WRKY	TF	up
Cluster-10658.102894	WRKY	TF	up
Cluster-10658.103798	WRKY	TF	up
Cluster-10658.103857	WRKY	TF	up
Cluster-10658.103858	WRKY	TF	up
Cluster-10658.104752	WRKY	TF	up
Cluster-10658.105878	WRKY	TF	up
Cluster-10658.105912	WRKY	TF	up
Cluster-10658.107309	WRKY	TF	up
Cluster-10658.107586	WRKY	TF	up
Cluster-10658.110024	WRKY	TF	up
Cluster-10658.111096	WRKY	TF	up
Cluster-10658.114032	WRKY	TF	up
Cluster-10658.119226	WRKY	TF	up
Cluster-10658.121398	WRKY	TF	up
Cluster-10658.122052	WRKY	TF	up
Cluster-10658.124100	WRKY	TF	up
Cluster-10658.128678	WRKY	TF	up
Cluster-10658.132598	WRKY	TF	up
Cluster-10658.135062	WRKY	TF	up
Cluster-10658.145413	WRKY	TF	up
Cluster-10658.177689	WRKY	TF	down
Cluster-10658.21421	WRKY	TF	up
Cluster-10658.22908	WRKY	TF	up
Cluster-10658.44640	WRKY	TF	up
Cluster-10658.45045	WRKY	TF	up
Cluster-10658.45336	WRKY	TF	up
Cluster-10658.52787	WRKY	TF	up
Cluster-10658.65114	WRKY	TF	up
Cluster-10658.65831	WRKY	TF	up
Cluster-10658.75869	WRKY	TF	up
Cluster-10658.75870	WRKY	TF	up
Cluster-10658.79195	WRKY	TF	up
Cluster-10658.81604	WRKY	TF	down
Cluster-10658.82969	WRKY	TF	down
Cluster-10658.83577	WRKY	TF	up
Cluster-10658.83903	WRKY	TF	up
Cluster-10658.85717	WRKY	TF	up
Cluster-10658.90392	WRKY	TF	up
Cluster-10658.92590	WRKY	TF	down
Cluster-10658.93867	WRKY	TF	up
Cluster-10658.94013	WRKY	TF	up
Cluster-10658.94223	WRKY	TF	up
Cluster-10658.94490	WRKY	TF	up
Cluster-10658.95150	WRKY	TF	up
Cluster-10658.96450	WRKY	TF	up
Cluster-10658.97506	WRKY	TF	up
Cluster-10658.97762	WRKY	TF	up
Cluster-10658.98221	WRKY	TF	up

## Sheet: S6
Different expression transcription factors in A-R vs B-R
ID	Family	Category	regulated
Cluster-10658.174830	AP2/ERF-AP2	TF	up
Cluster-10658.4643	AP2/ERF-AP2	TF	down
Cluster-10658.47824	AP2/ERF-AP2	TF	up
Cluster-10658.55690	AP2/ERF-AP2	TF	down
Cluster-10658.84126	AP2/ERF-AP2	TF	up
Cluster-10658.102065	AP2/ERF-ERF	TF	up
Cluster-10658.104553	AP2/ERF-ERF	TF	up
Cluster-10658.106165	AP2/ERF-ERF	TF	up
Cluster-10658.106703	AP2/ERF-ERF	TF	up
Cluster-10658.106908	AP2/ERF-ERF	TF	up
Cluster-10658.111583	AP2/ERF-ERF	TF	up
Cluster-10658.113379	AP2/ERF-ERF	TF	up
Cluster-10658.115942	AP2/ERF-ERF	TF	up
Cluster-10658.132372	AP2/ERF-ERF	TF	down
Cluster-10658.16374	AP2/ERF-ERF	TF	down
Cluster-10658.169244	AP2/ERF-ERF	TF	down
Cluster-10658.182860	AP2/ERF-ERF	TF	down
Cluster-10658.190681	AP2/ERF-ERF	TF	down
Cluster-10658.192676	AP2/ERF-ERF	TF	down
Cluster-10658.192969	AP2/ERF-ERF	TF	down
Cluster-10658.193636	AP2/ERF-ERF	TF	down
Cluster-10658.25895	AP2/ERF-ERF	TF	up
Cluster-10658.29136	AP2/ERF-ERF	TF	down
Cluster-10658.3248	AP2/ERF-ERF	TF	up
Cluster-10658.42103	AP2/ERF-ERF	TF	up
Cluster-10658.65727	AP2/ERF-ERF	TF	up
Cluster-10658.69020	AP2/ERF-ERF	TF	down
Cluster-10658.69621	AP2/ERF-ERF	TF	down
Cluster-10658.7625	AP2/ERF-ERF	TF	down
Cluster-10658.77341	AP2/ERF-ERF	TF	up
Cluster-10658.83126	AP2/ERF-ERF	TF	up
Cluster-10658.83614	AP2/ERF-ERF	TF	up
Cluster-10658.87378	AP2/ERF-ERF	TF	up
Cluster-10658.90849	AP2/ERF-ERF	TF	up
Cluster-10658.91123	AP2/ERF-ERF	TF	up
Cluster-10658.95348	AP2/ERF-ERF	TF	down
Cluster-10658.97019	AP2/ERF-ERF	TF	up
Cluster-13476.0	AP2/ERF-ERF	TF	down
Cluster-3620.0	AP2/ERF-ERF	TF	down
Cluster-10658.108617	B3	TF	up
Cluster-10658.109245	B3	TF	down
Cluster-10658.40073	B3	TF	up
Cluster-10658.4105	B3	TF	down
Cluster-10658.42168	B3	TF	down
Cluster-10658.109861	B3-ARF	TF	up
Cluster-10658.139068	B3-ARF	TF	down
Cluster-10658.150229	B3-ARF	TF	down
Cluster-10658.25787	B3-ARF	TF	down
Cluster-10658.41021	B3-ARF	TF	down
Cluster-10658.80993	B3-ARF	TF	down
Cluster-10658.119986	BBR-BPC	TF	up
Cluster-10658.130418	BBR-BPC	TF	up
Cluster-10658.32599	BBR-BPC	TF	up
Cluster-10658.57632	BBR-BPC	TF	down
Cluster-10658.133762	BES1	TF	up
Cluster-10658.155330	BES1	TF	up
Cluster-10658.20429	BES1	TF	down
Cluster-10658.101950	bHLH	TF	up
Cluster-10658.101953	bHLH	TF	up
Cluster-10658.104835	bHLH	TF	down
Cluster-10658.106176	bHLH	TF	down
Cluster-10658.111781	bHLH	TF	down
Cluster-10658.116634	bHLH	TF	down
Cluster-10658.123983	bHLH	TF	up
Cluster-10658.126607	bHLH	TF	down
Cluster-10658.134497	bHLH	TF	down
Cluster-10658.14092	bHLH	TF	up
Cluster-10658.141609	bHLH	TF	down
Cluster-10658.165682	bHLH	TF	down
Cluster-10658.172619	bHLH	TF	down
Cluster-10658.175027	bHLH	TF	down
Cluster-10658.184687	bHLH	TF	down
Cluster-10658.192673	bHLH	TF	down
Cluster-10658.24327	bHLH	TF	down
Cluster-10658.27701	bHLH	TF	down
Cluster-10658.28670	bHLH	TF	down
Cluster-10658.2985	bHLH	TF	down
Cluster-10658.41440	bHLH	TF	down
Cluster-10658.5273	bHLH	TF	down
Cluster-10658.64931	bHLH	TF	down
Cluster-10658.76719	bHLH	TF	down
Cluster-10658.84322	bHLH	TF	down
Cluster-10658.85631	bHLH	TF	down
Cluster-10658.89405	bHLH	TF	up
Cluster-16874.0	bHLH	TF	down
Cluster-8548.1	bHLH	TF	down
Cluster-10658.107624	bZIP	TF	up
Cluster-10658.109060	bZIP	TF	down
Cluster-10658.114312	bZIP	TF	up
Cluster-10658.12397	bZIP	TF	down
Cluster-10658.134236	bZIP	TF	down
Cluster-10658.142765	bZIP	TF	up
Cluster-10658.17596	bZIP	TF	down
Cluster-10658.52709	bZIP	TF	down
Cluster-10658.58221	bZIP	TF	up
Cluster-10658.83533	bZIP	TF	up
Cluster-10658.85618	bZIP	TF	up
Cluster-4161.0	bZIP	TF	up
[truncated: 300 more rows]

## Sheet: S7
Expression of transcripts involved in saponin biosynthesis in P. notoginseng.
[truncated: 246 more rows]

[truncated: 3 more sheets: S8, S9, S10]
